# Supplementary material for: Complementary DNA/RNA-Based Profiling: Characterization of Corrosive Microbial Communities and Their Functional Profiles in an Oil Production Facility
Source: PubMed Central journal article supplement (PMC6853844; doi:10.3389/fmicb.2019.02587), 2019-11-07
Supplement: Image_2.pdf [file Image_2.pdf]

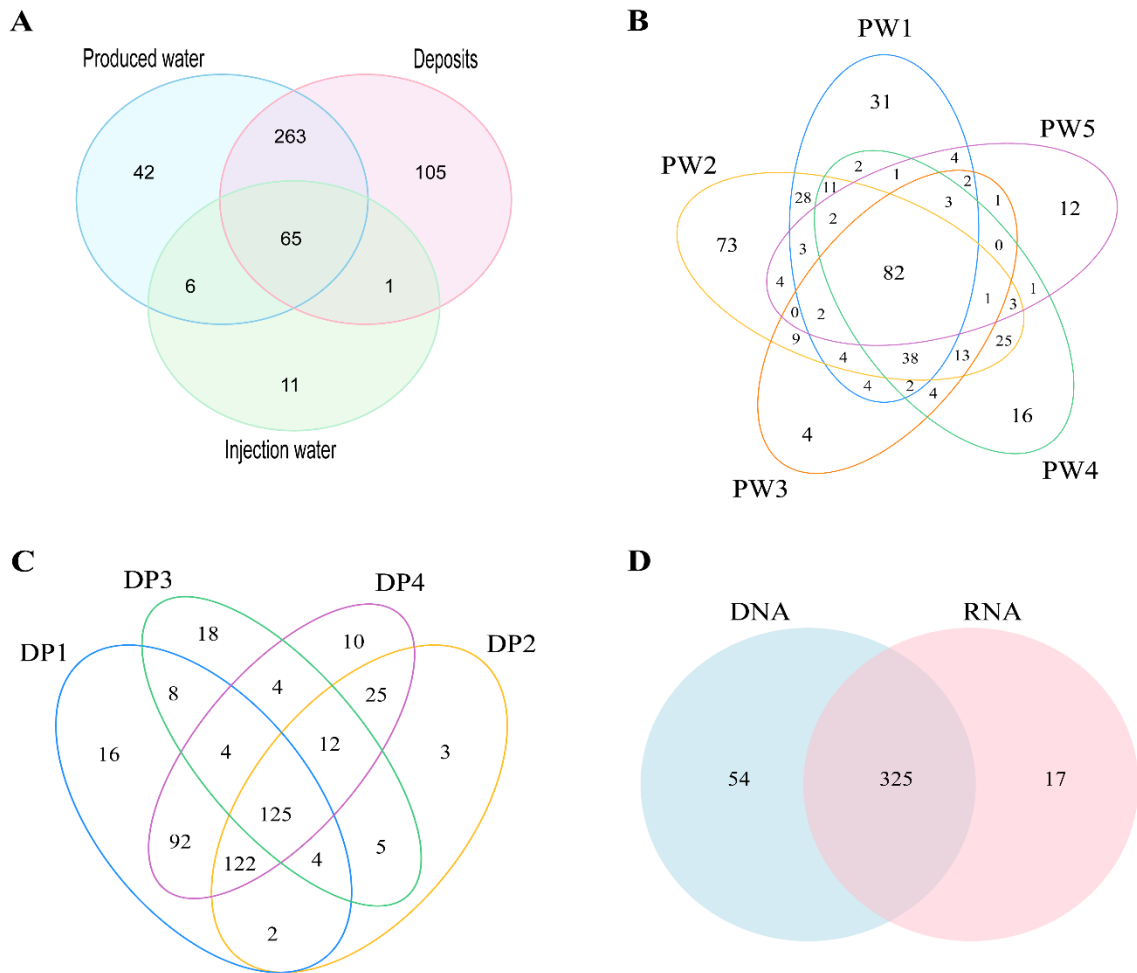

**Supplementary Figure S2.** Venn diagrams showing shared and unshared operational taxonomic units (zOTUs) among sample sources (A), satellite stations (B), deposits samples (C), and DNA-RNA based profiling analysis of produced water (D).
