# Supplementary material for: Complementary DNA/RNA-Based Profiling: Characterization of Corrosive Microbial Communities and Their Functional Profiles in an Oil Production Facility
Source: Front Microbiol. 2019 Nov 7;10:2587. doi: 10.3389/fmicb.2019.02587 (PMC6853844; doi:10.3389/fmicb.2019.02587)
Supplement: Supplementary file 5 [file Table_5.XLSX]

## Sheet: Table S5
Table S5: Predicted enzymes in total and active microbial communities recovered from produced water samples
KEGG Orthology	Enzyme	DNA_PW1_1	DNA_PW1_2	DNA_PW1_3	DNA_PW2_1	DNA_PW2_2	DNA_PW2_3	DNA_PW3_1	DNA_PW3_2	DNA_PW3_3	DNA_PW4_1	DNA_PW4_2	DNA_PW4_3	DNA_PW5_1	DNA_PW5_2	DNA_PW5_3	DNA_PW6_1	DNA_PW6_2	DNA_PW6_3	RNA_PW1_1	RNA_PW1_2	RNA_PW1_3	RNA_PW2_1	RNA_PW2_2	RNA_PW2_3	RNA_PW3_1	RNA_PW3_2	RNA_PW3_3	RNA_PW4_1	RNA_PW4_2	RNA_PW4_3	RNA_PW5_1	RNA_PW5_2	RNA_PW5_3	RNA_PW6_1	RNA_PW6_2	RNA_PW6_3
K00001	alcohol dehydrogenase [EC:1.1.1.1]	0.00117552	0.00117951	0.00119093	0.00113644	0.00114241	0.00113987	0.000999721	0.00105902	0.00101911	0.00125488	0.00129331	0.00127303	0.000987164	0.00111698	0.00100703	0.00112095	0.00113685	0.00111179	0.0011112	0.00106231	0.00111656	0.00103264	0.00107942	0.00106164	0.00081452	0.000801839	0.000843891	0.000999459	0.000953174	0.000909404	0.000920018	0.000963093	0.00090362	0.000918513	0.000925099	0.000985974
K00002	alcohol dehydrogenase (NADP+) [EC:1.1.1.2]	1.28838e-05	1.44525e-05	1.49179e-05	2.48212e-05	2.2303e-05	2.15558e-05	8.60195e-06	1.14178e-05	9.76464e-06	1.54343e-05	1.75878e-05	1.48596e-05	3.80403e-06	2.17109e-06	1.17772e-05	6.95083e-06	1.11035e-05	3.11111e-06	7.68362e-06	7.43157e-06	8.03845e-06	2.77569e-05	1.709e-05	2.16318e-05	8.8256e-06	9.43354e-06	8.58102e-06	2.6965e-05	2.82597e-05	2.88239e-05	2.44836e-06	2.40357e-06	2.91811e-06	3.92372e-06	1.02357e-05	9.01531e-06
K00003	homoserine dehydrogenase [EC:1.1.1.3]	0.000859586	0.000879956	0.000870488	0.000862889	0.000860034	0.000858295	0.000767639	0.00076637	0.000760583	0.000800441	0.000794342	0.000791403	0.000839993	0.000919798	0.000798084	0.000890841	0.000936686	0.000853511	0.000807315	0.000784702	0.000792584	0.000797301	0.000841336	0.000821115	0.000660085	0.000650594	0.000681191	0.000713002	0.000688284	0.000686917	0.000782657	0.000830342	0.000780681	0.000831352	0.000735816	0.00079069
K00004	(R,R)-butanediol dehydrogenase / diacetyl reductase [EC:1.1.1.4 1.1.1.303]	3.5482e-06	3.61133e-06	4.33702e-06	6.65678e-06	6.2665e-06	5.97845e-06	3.7601e-06	5.24153e-06	3.98285e-06	6.7137e-06	6.85838e-06	6.79826e-06	2.31334e-06	9.93287e-07	1.59519e-05	1.662e-06	4.59905e-06	1.2685e-06	3.04609e-06	3.37154e-06	3.4934e-06	7.889e-06	4.20591e-06	5.81898e-06	2.82834e-06	3.04306e-06	3.04297e-06	1.23715e-05	1.35221e-05	1.29855e-05	1.07397e-06	1.54446e-06	1.8105e-06	1.18223e-06	2.98732e-06	2.39984e-06
K00005	glycerol dehydrogenase [EC:1.1.1.6]	0.000151992	0.000146684	0.000142065	0.000172991	0.000172128	0.000171906	0.000187601	0.000193776	0.000190291	0.000219315	0.00024164	0.000238237	0.000156598	0.000136611	0.000169268	0.000158721	0.000130637	0.000175073	0.000160157	0.000160747	0.000158817	0.000126028	0.000146099	0.000137022	0.000208999	0.000209378	0.000199771	0.000130404	0.000129056	0.000135004	0.000184593	0.000172875	0.000181882	0.000164595	0.000180033	0.000170856
K00007	D-arabinitol 4-dehydrogenase [EC:1.1.1.11]	6.77093e-07	6.69115e-07	8.60195e-07	1.65279e-08	1.20347e-08	2.39876e-08	2.22682e-07	1.65851e-07	1.7697e-07	1.297e-06	1.31177e-06	1.07477e-06	2.95152e-06	1.89773e-07	3.19462e-06	1.94609e-07	2.74746e-07	1.29295e-06	8.86905e-07	1.17414e-06	1.07569e-06	6.75349e-09	6.42571e-09	1.91179e-08	9.65647e-08	1.01838e-07	1.70219e-07	1.24401e-06	1.5769e-06	1.05045e-06	1.24389e-07	1.62569e-07	2.97287e-07	1.22464e-07	1.19546e-07	1.72561e-07
K00008	L-iditol 2-dehydrogenase [EC:1.1.1.14]	0.000545549	0.000538871	0.00050941	0.000506922	0.00053218	0.000539116	0.000437759	0.00043563	0.000424049	0.000327058	0.000312403	0.000320161	0.000435938	0.000537566	0.000484842	0.000544517	0.000555765	0.000558205	0.000616573	0.000538176	0.000601013	0.000486096	0.00060605	0.000548421	0.00040488	0.000388505	0.000426996	0.000332996	0.000256988	0.000237765	0.000518571	0.000421743	0.000448805	0.000362726	0.000449039	0.00052956
K00009	mannitol-1-phosphate 5-dehydrogenase [EC:1.1.1.17]	0.000209867	0.000206767	0.000199868	0.000169236	0.000179195	0.000180576	0.000125966	0.000125128	0.000120343	8.64803e-05	7.894e-05	8.40066e-05	0.000126316	0.000171809	0.000149598	0.00019813	0.000213537	0.000180717	0.000206618	0.00017906	0.000198484	0.00015555	0.000201509	0.000182106	0.000106001	9.81958e-05	0.000116974	8.86522e-05	5.92328e-05	5.04754e-05	0.000154086	0.000119639	0.000129171	0.000115443	0.000142602	0.000180249
K00010	myo-inositol 2-dehydrogenase [EC:1.1.1.18]	4.13094e-05	4.09968e-05	4.35312e-05	6.34661e-05	5.97593e-05	5.63806e-05	8.58921e-05	7.77209e-05	8.17933e-05	5.74906e-05	5.64722e-05	5.71192e-05	9.68368e-05	5.18343e-05	0.00010823	5.18306e-05	5.88528e-05	3.94355e-05	3.24688e-05	4.19551e-05	3.39804e-05	5.53458e-05	3.82591e-05	4.51322e-05	0.000110074	0.000115135	0.000100637	7.13266e-05	8.17817e-05	8.83795e-05	8.39212e-05	8.37391e-05	8.87185e-05	7.62145e-05	8.27559e-05	6.56533e-05
K00011	aldehyde reductase [EC:1.1.1.21]	2.3205e-06	2.01393e-06	2.32289e-06	1.45307e-06	1.28776e-06	1.37025e-06	1.88842e-06	2.19715e-06	2.45741e-06	8.29704e-07	8.09475e-07	6.34367e-07	1.62766e-07	3.246e-07	4.38709e-07	9.98806e-07	4.4273e-07	8.4246e-07	2.20008e-06	2.32119e-06	2.58832e-06	1.06342e-06	9.14761e-07	1.11922e-06	2.471e-06	2.60524e-06	2.19106e-06	1.66656e-07	1.55161e-07	1.21062e-07	2.34704e-07	1.48023e-07	2.77473e-07	6.73239e-07	2.74098e-06	1.78953e-06
K00012	UDPglucose 6-dehydrogenase [EC:1.1.1.22]	0.00050451	0.000511219	0.00052485	0.000492166	0.000485637	0.00048896	0.000565808	0.000575375	0.000569589	0.000716388	0.000732619	0.000741775	0.000605637	0.000602702	0.000532164	0.000542728	0.000531586	0.000567614	0.000441287	0.000474458	0.000435511	0.000505882	0.000475506	0.000489352	0.000514666	0.000514035	0.000511907	0.000549472	0.000569044	0.000585732	0.000515888	0.000646864	0.000575317	0.000679478	0.000499865	0.000485175
K00013	histidinol dehydrogenase [EC:1.1.1.23]	0.000507002	0.000513167	0.000513533	0.000529778	0.000521413	0.000520456	0.000532765	0.000522987	0.00053068	0.000550851	0.000550985	0.000553453	0.000556017	0.000534907	0.000525106	0.000537012	0.000538913	0.000532837	0.000484373	0.000516652	0.000478792	0.000543721	0.00051605	0.000529198	0.000530976	0.000531544	0.000533356	0.000582188	0.000613674	0.000633647	0.000540872	0.000567846	0.0005588	0.000628276	0.000537821	0.000529699
K00014	shikimate dehydrogenase [EC:1.1.1.25]	0.000547312	0.000545628	0.000536996	0.000522928	0.000529951	0.000533701	0.000528441	0.00051906	0.000521011	0.000472963	0.000461213	0.000470244	0.00054442	0.000559137	0.000553866	0.000563275	0.000570308	0.000567074	0.000562566	0.000554991	0.000553587	0.000532069	0.000564514	0.000550068	0.000528602	0.000523042	0.000535588	0.000498476	0.000487934	0.000491971	0.000561388	0.000544242	0.000550385	0.000561828	0.00054151	0.000562241
K00015	glyoxylate reductase [EC:1.1.1.26]	0.000238314	0.000256896	0.000289144	0.000138658	0.000134819	0.000134632	0.000237066	0.000233777	0.000233482	0.000303022	0.000293586	0.000292283	0.000334892	0.000327067	0.000203176	0.000228526	0.000275527	0.000172943	0.000129284	0.000135629	0.000128982	0.000108409	0.000101506	0.000108743	0.000175753	0.000179898	0.000162162	0.00011336	0.000119778	0.000113571	0.000172532	0.000348068	0.000238283	0.000282709	0.000154586	0.000140908
K00016	L-lactate dehydrogenase [EC:1.1.1.27]	0.000175878	0.00017476	0.000173085	0.00017238	0.000176801	0.000176963	0.000146584	0.000145995	0.000141965	0.000128052	0.000114496	0.000126976	0.000156118	0.000173642	0.000184912	0.000176618	0.000183164	0.000182203	0.000182535	0.00018012	0.000176681	0.000159221	0.000183669	0.000174606	0.000127322	0.000121384	0.000137124	0.000142909	0.000142943	0.000148087	0.000166922	0.000164458	0.000159819	0.000185882	0.000151011	0.000167844
K00018	glycerate dehydrogenase [EC:1.1.1.29]	0.000119709	0.000120516	0.000126708	0.000112051	0.000108299	0.00010963	0.000118656	0.000128213	0.000122534	0.000137864	0.000146148	0.000138738	8.17579e-05	6.74151e-05	8.20569e-05	8.84963e-05	8.96072e-05	7.71538e-05	0.00010735	0.000114533	0.000110903	0.000148027	0.000107533	0.000127174	0.000146022	0.000149523	0.000140227	0.000188419	0.000200222	0.000196842	9.41116e-05	9.91278e-05	0.000108217	9.8714e-05	0.000129404	0.000114618
K00019	3-hydroxybutyrate dehydrogenase [EC:1.1.1.30]	0.000296401	0.000295909	0.000288098	0.000314642	0.000319916	0.000317506	0.000251633	0.00025063	0.000247595	0.000290076	0.000290414	0.000291299	0.000294026	0.000301061	0.000346821	0.000308658	0.000309227	0.000334373	0.000323301	0.000312166	0.000321897	0.000269551	0.000315127	0.000293299	0.000208872	0.00020137	0.000225341	0.000252918	0.000233084	0.00021224	0.000277464	0.000247003	0.000257694	0.000251876	0.000244461	0.00027937
K00020	3-hydroxyisobutyrate dehydrogenase [EC:1.1.1.31]	0.000154299	0.000154856	0.000162456	0.000143664	0.000141647	0.000142325	0.000158696	0.000156873	0.000159893	0.000160035	0.000159665	0.00015383	0.000162332	0.000130801	0.00018123	0.000127944	0.000126849	0.000137247	0.000161346	0.000168351	0.000167189	0.000141857	0.000134613	0.000140448	0.000185897	0.000187873	0.000179533	0.000167679	0.000175754	0.000170173	0.000157174	0.000160957	0.00016482	0.000150697	0.000163697	0.000149552
K00021	hydroxymethylglutaryl-CoA reductase (NADPH) [EC:1.1.1.34]	9.67807e-05	0.000111933	0.000129369	4.42718e-05	3.67268e-05	4.7246e-05	0.000160533	0.000151603	0.000155024	0.000237652	0.000226565	0.000244142	0.000232595	0.000213401	9.11699e-05	0.000142026	0.000137137	0.000162883	5.7635e-05	0.000122505	4.59975e-05	0.000108192	7.31883e-05	9.32708e-05	0.000133304	0.000129434	0.000138335	0.000216446	0.0002717	0.000298534	0.000144525	0.000298224	0.000222021	0.00039645	0.000122179	0.000104918
K00023	acetoacetyl-CoA reductase [EC:1.1.1.36]	5.36435e-05	5.40083e-05	5.62117e-05	7.67298e-05	7.33886e-05	6.97284e-05	4.3059e-05	4.56896e-05	4.54258e-05	7.72416e-05	8.11075e-05	7.67631e-05	6.30433e-05	4.15255e-05	8.58099e-05	4.71189e-05	4.77092e-05	5.67889e-05	5.21906e-05	5.53051e-05	5.65917e-05	5.24934e-05	4.85464e-05	5.06851e-05	3.12784e-05	3.21377e-05	3.3229e-05	6.58744e-05	7.13289e-05	6.49953e-05	3.75425e-05	3.34905e-05	3.63626e-05	3.18771e-05	4.11474e-05	4.0506e-05
K00024	malate dehydrogenase [EC:1.1.1.37]	0.000143301	0.000144853	0.000150177	0.000146916	0.000141552	0.000150465	0.000233827	0.000213323	0.000222372	0.000212812	0.000203933	0.000227004	0.000233894	0.000154541	0.000186139	0.00016851	0.00013779	0.000210725	0.000162975	0.000236312	0.000148216	0.000231138	0.000179351	0.000208743	0.000320956	0.000318101	0.000319487	0.000388957	0.000452932	0.000490032	0.00026396	0.000308912	0.000317762	0.000448545	0.00026717	0.000238512
K00027	malate dehydrogenase (oxaloacetate-decarboxylating) [EC:1.1.1.38]	0.00051312	0.0005253	0.000532925	0.000497061	0.000491923	0.000497275	0.000501008	0.000508185	0.000500186	0.000543262	0.000547628	0.000545107	0.000505952	0.000517295	0.00045077	0.000497287	0.000497155	0.000497923	0.000481327	0.000492306	0.000472973	0.000484825	0.000483195	0.000487978	0.000481705	0.000476495	0.000483498	0.000495375	0.000504051	0.000518555	0.000484546	0.000556808	0.000513379	0.000585194	0.000479847	0.000480328
K00029	malate dehydrogenase (oxaloacetate-decarboxylating)(NADP+) [EC:1.1.1.40]	0.000427712	0.000431346	0.000435912	0.000417846	0.000412896	0.000417721	0.000472996	0.000475789	0.000474975	0.000446926	0.0004563	0.000443074	0.000449682	0.000402716	0.000398635	0.000390347	0.000379023	0.000396751	0.000429056	0.000426536	0.000434227	0.000441411	0.000412391	0.000425999	0.000535401	0.000542495	0.000514786	0.000459459	0.000463564	0.000469455	0.00046029	0.00047519	0.000478346	0.000419414	0.000472475	0.000440318
K00030	isocitrate dehydrogenase (NAD+) [EC:1.1.1.41]	0.000279424	0.000288032	0.000275317	0.00029082	0.000290395	0.000295058	0.000284249	0.000281233	0.000280234	0.000308725	0.0003162	0.000314993	0.000310181	0.000329538	0.000269454	0.000311727	0.000301828	0.000337311	0.000296597	0.000295405	0.000286539	0.000275683	0.000312173	0.000294281	0.000264597	0.000258082	0.000271016	0.000243654	0.000238343	0.000247441	0.000316487	0.000328298	0.000314247	0.000345166	0.000271422	0.000290831
K00031	isocitrate dehydrogenase [EC:1.1.1.42]	0.000304092	0.000319182	0.000330703	0.000346341	0.000329033	0.000319333	0.00030481	0.000303867	0.000310492	0.000351163	0.000351388	0.000329519	0.000342252	0.000302907	0.00039201	0.000286829	0.000330208	0.000243179	0.000261607	0.000272802	0.000276882	0.000337686	0.000278761	0.000302695	0.000290388	0.000302001	0.000281975	0.000354103	0.00037578	0.000360801	0.000275107	0.000299987	0.000290973	0.000252984	0.000291715	0.00026894
K00032	phosphogluconate 2-dehydrogenase [EC:1.1.1.43]	1.75197e-05	1.66653e-05	1.8693e-05	8.39474e-06	8.0352e-06	8.05787e-06	2.59911e-05	2.19776e-05	2.50374e-05	8.04538e-06	7.50974e-06	6.96082e-06	2.53293e-05	9.23816e-06	1.85565e-05	1.21157e-05	1.21445e-05	5.37275e-06	1.2782e-05	1.39393e-05	1.34267e-05	7.86044e-06	6.55064e-06	7.59381e-06	4.56021e-05	4.74423e-05	3.94029e-05	3.48377e-06	4.00051e-06	3.57488e-06	2.43525e-05	2.55825e-05	2.80908e-05	1.68314e-05	2.94117e-05	2.21188e-05
K00033	6-phosphogluconate dehydrogenase [EC:1.1.1.44]	0.000166534	0.000162857	0.000177513	0.000116079	0.000114412	0.000108735	5.49764e-05	5.90455e-05	5.5403e-05	4.76256e-05	5.0366e-05	5.22304e-05	3.8941e-05	3.36197e-05	0.00010908	0.000110039	0.000153764	4.05045e-05	7.60675e-05	7.2886e-05	7.09373e-05	9.34203e-05	7.9632e-05	9.32751e-05	4.94964e-05	4.84921e-05	4.91884e-05	7.78334e-05	8.24954e-05	9.34652e-05	5.35976e-05	3.39504e-05	3.97325e-05	5.61926e-05	8.78561e-05	9.63624e-05
K00034	glucose 1-dehydrogenase [EC:1.1.1.47]	6.21708e-05	6.36899e-05	7.06105e-05	7.49751e-05	6.96776e-05	6.89214e-05	6.6838e-05	6.94925e-05	6.97872e-05	0.000122378	0.000126564	0.000126426	7.05932e-05	5.31792e-05	7.02557e-05	5.89322e-05	4.82436e-05	7.01963e-05	5.62749e-05	7.90781e-05	5.8464e-05	6.64995e-05	4.99962e-05	5.97198e-05	6.36863e-05	6.32872e-05	6.60511e-05	0.000119437	0.000138805	0.000137234	5.20965e-05	7.56722e-05	7.01959e-05	0.000112892	6.49583e-05	5.68639e-05
K00035	D-galactose 1-dehydrogenase [EC:1.1.1.48]	3.31281e-07	2.99991e-07	3.64701e-07	1.12418e-06	9.1768e-07	1.04439e-06	1.56416e-06	1.45494e-06	1.39331e-06	1.18513e-07	5.74837e-07	2.35965e-07	5.60025e-06	2.56389e-07	4.47051e-06	2.98104e-08	5.36429e-07	1.61635e-06	1.02459e-07	1.2599e-07	1.19257e-07	2.33747e-07	2.26915e-07	3.05572e-07	1.85203e-07	2.25606e-07	2.54208e-07	6.07441e-08	1.93564e-07	8.08395e-08	6.2543e-08	1.22309e-07	1.22548e-07	1.6062e-07	2.14933e-07	1.89933e-07
K00036	glucose-6-phosphate 1-dehydrogenase [EC:1.1.1.49]	0.000163493	0.000162281	0.000178412	0.000118505	0.000117559	0.000116186	8.50353e-05	9.51345e-05	9.02008e-05	0.000132187	0.000127428	0.000121797	8.4454e-05	6.97387e-05	0.000158851	0.00010883	0.000134156	8.11538e-05	0.000144152	0.000150058	0.000153179	0.000124062	0.000109473	0.000119336	7.75957e-05	7.78287e-05	8.23459e-05	0.000182841	0.000203456	0.000197346	9.71534e-05	6.30804e-05	7.34764e-05	6.93982e-05	0.000106256	0.000105217
K00038	3alpha(or 20beta)-hydroxysteroid dehydrogenase [EC:1.1.1.53]	3.48262e-05	3.35288e-05	3.64891e-05	5.46541e-05	4.95934e-05	4.83115e-05	4.28882e-05	4.43798e-05	4.50819e-05	7.93963e-05	8.53072e-05	8.57705e-05	4.76042e-05	2.62255e-05	8.97779e-05	3.79399e-05	3.74767e-05	4.85879e-05	2.86838e-05	4.4705e-05	2.93863e-05	5.02502e-05	3.4565e-05	4.32378e-05	4.01169e-05	4.05044e-05	4.18671e-05	8.47531e-05	0.000100716	0.000103704	3.73683e-05	4.20147e-05	4.51857e-05	6.8275e-05	4.38483e-05	3.82589e-05
K00039	ribitol 2-dehydrogenase [EC:1.1.1.56]	2.71071e-07	1.28396e-06	6.65705e-07	4.86424e-06	3.94031e-06	3.86255e-06	7.10857e-08	5.5676e-09	3.26012e-07	1.31408e-06	2.6218e-06	8.0823e-07	9.19469e-07	1.54715e-08	4.49219e-06	4.17114e-08	7.13177e-07	4.30062e-07	5.47574e-07	4.32021e-07	5.38693e-07	1.60991e-06	1.43207e-06	1.4317e-06	4.76856e-08	7.9106e-08	0	3.08215e-07	8.27911e-08	2.11951e-07	8.52784e-09	7.42776e-09	4.59977e-08	2.741e-08	9.84641e-08	1.22966e-07
K00040	fructuronate reductase [EC:1.1.1.57]	0.000144801	0.000142039	0.00014013	0.00011497	0.00012091	0.000121353	8.64962e-05	8.59325e-05	8.32373e-05	6.22849e-05	5.849e-05	6.04897e-05	9.52406e-05	0.00011057	0.000117536	0.000131424	0.000145902	0.00011665	0.000137622	0.000122347	0.000132923	0.000102571	0.000130194	0.000119245	6.89014e-05	6.47751e-05	7.60867e-05	7.60476e-05	6.93086e-05	7.05388e-05	0.000112677	8.43861e-05	9.00911e-05	7.80145e-05	9.75221e-05	0.000118963
K00041	tagaturonate reductase [EC:1.1.1.58]	6.79713e-05	6.69169e-05	6.28024e-05	6.51218e-05	6.88301e-05	6.95091e-05	4.97647e-05	5.00088e-05	4.77265e-05	3.46091e-05	3.04876e-05	3.29559e-05	5.05023e-05	6.76716e-05	5.97455e-05	6.85921e-05	7.00052e-05	7.12829e-05	7.85021e-05	6.74787e-05	7.64188e-05	5.9338e-05	7.76324e-05	6.89857e-05	4.10617e-05	3.82884e-05	4.55305e-05	3.47235e-05	2.31566e-05	1.96282e-05	6.033e-05	4.69987e-05	5.03752e-05	4.18508e-05	5.16312e-05	6.44852e-05
K00042	2-hydroxy-3-oxopropionate reductase [EC:1.1.1.60]	0.000236332	0.000235386	0.000228347	0.000227467	0.000235649	0.000237154	0.000189631	0.000191996	0.000186278	0.000160511	0.000155655	0.000152402	0.000184032	0.000213485	0.000214243	0.000217799	0.000223827	0.000226332	0.000270392	0.000243229	0.000269776	0.000232194	0.000260313	0.000246897	0.000185897	0.00018116	0.000193996	0.000197059	0.000172767	0.000157814	0.000214352	0.00017266	0.000189588	0.000146491	0.000199727	0.000224581
K00043	4-hydroxybutyrate dehydrogenase [EC:1.1.1.61]	0.000193114	0.000188835	0.000175787	0.000183195	0.000193577	0.000196016	0.000145121	0.000150232	0.000141886	0.000133279	0.000133965	0.000136503	0.000143401	0.000190333	0.000164341	0.000198787	0.000196211	0.0002139	0.000219694	0.000188936	0.000213713	0.000164836	0.00021748	0.000192197	0.000115386	0.000107321	0.000127665	0.000100759	6.71557e-05	5.65067e-05	0.00016912	0.000131362	0.00014108	0.000117207	0.000144614	0.000181292
K00044	estradiol 17beta-dehydrogenase [EC:1.1.1.62]	1.32521e-06	1.42639e-06	1.90645e-06	4.18916e-08	3.30203e-08	5.72878e-08	2.86256e-07	3.87267e-07	3.86099e-07	3.01354e-06	2.61661e-06	2.37849e-06	8.15843e-07	3.39266e-07	3.13433e-06	4.53762e-07	8.83975e-07	2.26818e-07	2.03217e-06	2.68994e-06	2.49932e-06	1.56915e-08	1.49299e-08	4.44198e-08	2.24749e-07	2.36618e-07	3.95498e-07	2.88935e-06	3.66388e-06	2.4368e-06	2.15231e-07	3.18681e-07	4.88702e-07	2.82805e-07	2.75008e-07	2.1163e-07
K00045	mannitol 2-dehydrogenase [EC:1.1.1.67]	9.37094e-06	1.00978e-05	1.3417e-05	3.16475e-07	2.62183e-07	5.84214e-07	2.07755e-06	2.71682e-06	2.61738e-06	2.12664e-05	1.87342e-05	1.68699e-05	7.25928e-06	2.41946e-06	1.55602e-05	3.19093e-06	4.1755e-06	2.27128e-06	1.43604e-05	1.90036e-05	1.76415e-05	1.18784e-07	1.20677e-07	3.36255e-07	1.58333e-06	1.6698e-06	2.79463e-06	2.04181e-05	2.58558e-05	1.72216e-05	1.56621e-06	2.31218e-06	3.56036e-06	2.00821e-06	2.01989e-06	1.61646e-06
K00046	gluconate 5-dehydrogenase [EC:1.1.1.69]	0.000101762	0.000101802	0.000101224	0.000158577	0.000151895	0.000142395	0.000116624	0.000111494	0.000115944	0.000139642	0.000146042	0.000142399	0.000156572	0.000118748	0.000203442	0.000120838	0.000132367	0.000118742	8.85693e-05	9.24117e-05	9.31056e-05	0.000119487	0.000108174	0.000111974	9.6083e-05	0.000100228	9.56692e-05	0.000114307	0.000115394	0.000105295	0.000105899	0.000100681	0.000107326	8.65996e-05	0.000104317	0.000103235
K00048	lactaldehyde reductase [EC:1.1.1.77]	0.000354643	0.000348343	0.000336241	0.000344477	0.000352423	0.000354912	0.000259069	0.00028011	0.000264995	0.000281136	0.000293769	0.00028832	0.000212996	0.000287502	0.000254907	0.000330393	0.000322508	0.00033576	0.000368672	0.000330001	0.000365763	0.000305869	0.000359859	0.000335454	0.000217685	0.000208332	0.000232185	0.000230148	0.000190082	0.000183288	0.000278183	0.000212301	0.000229859	0.000204314	0.000272523	0.000310687
K00050	hydroxypyruvate reductase [EC:1.1.1.81]	0.000147365	0.000156186	0.00017218	9.41923e-05	9.35384e-05	9.65469e-05	0.000204471	0.000198776	0.000203269	0.000209043	0.00020123	0.000195149	0.000240285	0.000209584	0.000150338	0.000138783	0.000147035	0.000124834	0.000135227	0.000137591	0.000142903	0.000105007	9.73989e-05	0.00010017	0.000213318	0.000220113	0.00019633	0.000126578	0.000125737	0.000109539	0.000162241	0.000242572	0.000198988	0.000175513	0.000156768	0.000131038
K00052	3-isopropylmalate dehydrogenase [EC:1.1.1.85]	0.000662509	0.000673578	0.00066952	0.000660127	0.000650169	0.00066017	0.000749132	0.000716583	0.000737839	0.000699216	0.000685121	0.000697999	0.000785901	0.000723202	0.000682026	0.000713402	0.00069165	0.000734265	0.000676088	0.000739509	0.000660519	0.000717418	0.000697897	0.000709035	0.000818729	0.000817086	0.000814416	0.000789616	0.000846514	0.000885672	0.000796975	0.00084531	0.000839854	0.000959675	0.000775475	0.000752908
K00053	ketol-acid reductoisomerase [EC:1.1.1.86]	0.000463968	0.000463992	0.00046374	0.000462414	0.000459443	0.00046177	0.000505005	0.000489674	0.00050069	0.000461818	0.000457477	0.000462555	0.000496732	0.000460491	0.000476005	0.000473254	0.000463243	0.000473525	0.000469303	0.00049238	0.000464603	0.000481751	0.000470105	0.000477387	0.000560202	0.000561731	0.00055198	0.000513567	0.000533053	0.000548106	0.000522802	0.000523016	0.00053541	0.000561181	0.000526068	0.000509514
K00054	hydroxymethylglutaryl-CoA reductase [EC:1.1.1.88]	4.14883e-07	6.70949e-07	5.36e-07	1.77682e-06	1.92388e-06	1.50216e-06	1.57332e-07	3.31861e-10	2.55852e-08	5.89331e-07	1.33222e-07	1.96972e-07	1.61025e-06	5.00823e-07	2.71474e-06	3.50299e-07	4.25095e-08	7.41252e-07	1.45951e-07	4.21236e-08	1.74498e-07	4.56113e-06	3.41911e-06	3.49672e-06	6.78169e-08	0	5.80475e-08	2.26095e-08	6.28643e-08	4.36079e-09	4.48856e-07	4.35849e-07	5.41951e-07	4.34689e-08	1.73344e-07	2.87156e-07
K00055	aryl-alcohol dehydrogenase [EC:1.1.1.90]	9.77944e-05	9.49452e-05	9.10024e-05	8.18206e-05	8.64019e-05	8.81026e-05	0.000128049	0.000115162	0.000122258	5.41053e-05	4.84633e-05	4.95559e-05	0.000124626	0.000103785	0.000135477	9.75574e-05	9.6486e-05	9.5943e-05	0.000122271	0.000111051	0.000121564	7.83045e-05	0.000100866	8.99583e-05	0.000177134	0.000179336	0.000165257	5.485e-05	4.40285e-05	4.17266e-05	0.000148257	0.000127822	0.000142136	8.9579e-05	0.000133737	0.000127514
K00057	glycerol-3-phosphate dehydrogenase (NAD(P)+) [EC:1.1.1.94]	0.000321207	0.000316633	0.000311437	0.000352791	0.000351009	0.000343712	0.000296427	0.000297743	0.00030041	0.000272082	0.000277651	0.000271842	0.00027445	0.000272476	0.000342535	0.000310041	0.000319036	0.00028901	0.000314172	0.000298251	0.000318909	0.000307269	0.000313397	0.000310212	0.000300212	0.00030359	0.000297023	0.000271501	0.000258877	0.000256252	0.000300046	0.000244134	0.000271502	0.000219938	0.000314559	0.000315367
K00058	D-3-phosphoglycerate dehydrogenase [EC:1.1.1.95]	0.00118701	0.00122301	0.00125939	0.00107445	0.0010615	0.00106131	0.00124102	0.00121114	0.00121182	0.00134942	0.00135098	0.00136016	0.00139831	0.00130142	0.00116802	0.00122796	0.00130963	0.0011199	0.000981376	0.00104303	0.000952498	0.00110002	0.00102082	0.0010637	0.00122885	0.00123458	0.0012063	0.00124059	0.0012998	0.00131644	0.00118922	0.00146191	0.00133491	0.00146401	0.00114845	0.00113566
K00059	3-oxoacyl-[acyl-carrier protein] reductase [EC:1.1.1.100]	0.00126838	0.00127906	0.00131843	0.00137867	0.00136065	0.00133306	0.00118227	0.0012103	0.00118581	0.00162042	0.00164987	0.00164429	0.0014361	0.00126625	0.00176304	0.00125607	0.00133258	0.00131273	0.00118427	0.00122284	0.0012085	0.00118554	0.00116048	0.00117419	0.000984727	0.000983509	0.00101452	0.00137129	0.00138276	0.00128199	0.00107885	0.00118699	0.00114089	0.00116813	0.00106234	0.00109797
K00060	threonine 3-dehydrogenase [EC:1.1.1.103]	0.000177591	0.000186546	0.000203341	0.000119777	0.000119657	0.000120314	0.000150144	0.000159144	0.000151733	0.000234714	0.000231981	0.000232881	0.000210694	0.000242361	0.000160653	0.000178833	0.000207582	0.000157583	0.000114042	0.000109112	0.000114147	9.53808e-05	0.000103061	0.000101255	6.66231e-05	6.55081e-05	6.95857e-05	8.59425e-05	8.06938e-05	6.98847e-05	0.000104907	0.000209909	0.000138507	0.000171678	8.77728e-05	9.71978e-05
K00064	D-threo-aldose 1-dehydrogenase [EC:1.1.1.122]	1.75791e-05	1.756e-05	2.06711e-05	1.41718e-05	1.36658e-05	1.25404e-05	1.51162e-05	1.22245e-05	1.37765e-05	1.52557e-05	1.35721e-05	1.40136e-05	1.88266e-05	5.51358e-06	2.58083e-05	1.11265e-05	1.28821e-05	6.30378e-06	1.3664e-05	1.79061e-05	1.45637e-05	6.6035e-06	5.34284e-06	6.96419e-06	2.55488e-05	2.61379e-05	2.34028e-05	1.73627e-05	2.16731e-05	1.87443e-05	1.58938e-05	1.71667e-05	1.95566e-05	1.81575e-05	1.80638e-05	1.526e-05
K00065	2-deoxy-D-gluconate 3-dehydrogenase [EC:1.1.1.125]	0.000152155	0.000150579	0.000150081	0.000168643	0.000167733	0.000164925	0.000137192	0.000135213	0.000134661	0.000158442	0.000158585	0.000160767	0.000159558	0.00014782	0.000185121	0.000160572	0.000163728	0.000162558	0.000152784	0.00015661	0.000152895	0.000150673	0.00015677	0.000154507	0.000117631	0.000116035	0.000124597	0.000156494	0.000157396	0.000146914	0.000143074	0.000131155	0.000139913	0.000140594	0.000135374	0.000146817
K00066	GDP-mannose 6-dehydrogenase [EC:1.1.1.132]	1.26502e-05	1.21977e-05	1.40567e-05	8.41595e-06	7.33568e-06	7.91441e-06	1.17388e-05	1.30105e-05	1.38702e-05	1.11354e-05	1.04953e-05	9.77962e-06	1.1591e-05	1.08715e-05	9.71879e-06	7.95802e-06	7.26844e-06	8.31126e-06	9.38553e-06	9.96521e-06	1.09768e-05	1.31338e-05	1.04949e-05	1.15172e-05	1.03391e-05	1.09184e-05	9.2111e-06	1.04975e-06	1.06354e-06	6.98482e-07	3.61988e-06	9.4003e-06	6.1155e-06	8.78193e-06	1.16183e-05	7.74388e-06
K00067	dTDP-4-dehydrorhamnose reductase [EC:1.1.1.133]	0.000304167	0.000307571	0.000321262	0.000256785	0.000253278	0.000259304	0.000333279	0.000329622	0.000335201	0.000361359	0.000355034	0.000356665	0.000329268	0.000299151	0.000286062	0.000286671	0.000272124	0.000292742	0.000307837	0.000339997	0.000312967	0.000286768	0.000268032	0.000279914	0.000373733	0.000376326	0.000365059	0.000371919	0.000404665	0.000406286	0.000334103	0.000371901	0.000363761	0.000389685	0.000337093	0.000309765
K00068	sorbitol-6-phosphate 2-dehydrogenase [EC:1.1.1.140]	0.00016379	0.000160592	0.000151706	0.000151983	0.000159815	0.00016186	0.000120046	0.000122265	0.000116334	9.88657e-05	9.66698e-05	0.00010059	0.000120681	0.000155152	0.000141716	0.000165086	0.00016763	0.00017144	0.000180407	0.000157616	0.000174719	0.000138452	0.000178965	0.000160397	9.75131e-05	9.08433e-05	0.000107771	8.81235e-05	6.25392e-05	5.48051e-05	0.000140202	0.000111074	0.000119143	0.000105156	0.000122688	0.000152472
K00073	ureidoglycolate dehydrogenase [EC:1.1.1.154]	6.0284e-06	7.42448e-06	9.01489e-06	4.12981e-06	3.86939e-06	3.90249e-06	8.12366e-06	8.76307e-06	7.84293e-06	1.68635e-05	1.65142e-05	1.66286e-05	1.62022e-05	1.63782e-05	9.07633e-06	7.47411e-06	1.01792e-05	7.0486e-06	6.50395e-07	7.99132e-07	5.29233e-07	4.85609e-06	2.38753e-06	3.34492e-06	9.53224e-07	1.08224e-06	1.02844e-06	7.62155e-06	8.0153e-06	7.83623e-06	3.44505e-06	1.53514e-05	7.64705e-06	1.16597e-05	6.47503e-07	7.2921e-07
K00074	3-hydroxybutyryl-CoA dehydrogenase [EC:1.1.1.157]	0.000349214	0.00035198	0.000316461	0.000661796	0.000647863	0.0005933	0.000410852	0.000359999	0.000392936	0.000359999	0.000339715	0.000341909	0.000591092	0.000540889	0.000724437	0.000529302	0.000592429	0.000457982	0.000323605	0.000297659	0.000340974	0.000433208	0.000438661	0.000418146	0.000296258	0.000316427	0.000305391	0.000299659	0.00026932	0.000227927	0.000447625	0.000330109	0.000389028	0.00021813	0.00037985	0.000412753
K00075	UDP-N-acetylmuramate dehydrogenase [EC:1.1.1.158]	0.000308706	0.000304299	0.000297177	0.000343878	0.000344953	0.000337875	0.000284963	0.000285534	0.000286617	0.000252843	0.000254732	0.000248699	0.000266078	0.000271494	0.000334264	0.000298205	0.00030767	0.000282207	0.000313578	0.000289658	0.000318228	0.000302023	0.000314274	0.000307145	0.000286684	0.000289244	0.000284828	0.000253499	0.000234321	0.000226258	0.000292056	0.000234404	0.000262388	0.00019439	0.000297545	0.000304297
K00076	7-alpha-hydroxysteroid dehydrogenase [EC:1.1.1.159]	5.72371e-05	5.68854e-05	5.64061e-05	4.9526e-05	5.09115e-05	5.00148e-05	3.21114e-05	3.13136e-05	3.08766e-05	2.89087e-05	2.71102e-05	2.7766e-05	3.81995e-05	4.47809e-05	6.03295e-05	5.38925e-05	6.32828e-05	4.58684e-05	5.193e-05	4.71723e-05	5.09834e-05	4.23364e-05	5.10088e-05	4.74972e-05	2.46619e-05	2.33558e-05	2.76066e-05	2.93681e-05	2.48901e-05	2.12303e-05	3.98529e-05	3.04836e-05	3.37355e-05	2.86192e-05	3.72774e-05	4.6065e-05
K00077	2-dehydropantoate 2-reductase [EC:1.1.1.169]	0.000327194	0.000340391	0.0003441	0.000335373	0.00033126	0.000333668	0.000437243	0.000418549	0.000423334	0.000467377	0.000465203	0.000469309	0.000501463	0.000442502	0.000409914	0.00037804	0.000372217	0.00039366	0.000327333	0.000358751	0.000320439	0.000341909	0.000327594	0.000332874	0.000465805	0.000468369	0.000454147	0.000419577	0.000443812	0.000444441	0.000433965	0.00052877	0.000493088	0.00052397	0.000390334	0.000374359
K00082	5-amino-6-(5-phosphoribosylamino)uracil reductase [EC:1.1.1.193]	1.33648e-05	1.4168e-05	1.50119e-05	1.46251e-05	1.314e-05	1.51062e-05	2.7368e-05	2.49478e-05	2.62914e-05	3.41978e-05	3.51115e-05	3.70218e-05	2.56659e-05	1.38719e-05	1.93895e-05	1.98769e-05	1.3878e-05	2.89784e-05	1.6272e-05	3.35427e-05	1.31621e-05	3.26892e-05	1.96916e-05	2.69282e-05	3.87158e-05	3.75472e-05	4.07121e-05	7.3102e-05	8.90447e-05	9.79578e-05	3.14071e-05	4.08511e-05	4.13268e-05	7.957e-05	3.51363e-05	3.03669e-05
K00086	1,3-propanediol dehydrogenase [EC:1.1.1.202]	0.000473379	0.000464339	0.000451738	0.000457805	0.000468937	0.000474661	0.00036881	0.000394537	0.000375915	0.000385401	0.000391847	0.000391414	0.000301462	0.000397331	0.000347273	0.000440086	0.00042166	0.000466029	0.000514816	0.000478099	0.000513045	0.000450592	0.000501398	0.000479835	0.000329216	0.000317227	0.000350886	0.000393299	0.000358989	0.0003508	0.000395801	0.000318407	0.000345826	0.000328135	0.000393862	0.000435436
K00087	xanthine dehydrogenase molybdenum-binding subunit [EC:1.17.1.4]	0.000953977	0.00093826	0.000878321	0.000879128	0.000930855	0.000944152	0.000714454	0.0007211	0.000695047	0.000525732	0.0004944	0.000514613	0.000704553	0.000951991	0.000798852	0.000963844	0.000975684	0.00100962	0.00110901	0.000957443	0.00108084	0.000849285	0.00109079	0.000974769	0.000607895	0.00057286	0.000665122	0.000556877	0.000419672	0.000394986	0.00088854	0.000682695	0.000731364	0.000597901	0.000749958	0.000913517
K00088	IMP dehydrogenase [EC:1.1.1.205]	0.001008	0.00102584	0.00103703	0.00103898	0.00101635	0.00101821	0.00116214	0.00112593	0.00115345	0.001244	0.00123409	0.00126606	0.00128976	0.00120776	0.00116338	0.00115533	0.00114583	0.00117918	0.000937837	0.00107245	0.000917529	0.00102506	0.000971213	0.00100517	0.00112377	0.00112268	0.00113324	0.00123428	0.00134875	0.00141257	0.00115226	0.00134011	0.00125994	0.00157332	0.00113137	0.00109506
K00090	gluconate 2-dehydrogenase [EC:1.1.1.215]	0.000100189	0.000107252	0.000118778	7.71097e-05	7.27147e-05	7.07181e-05	9.32597e-05	9.11496e-05	9.229e-05	0.000125079	0.000128382	0.000122863	0.000128462	0.000103861	9.15353e-05	8.6643e-05	0.000101668	6.35989e-05	5.42672e-05	5.68843e-05	5.5166e-05	4.51617e-05	4.19015e-05	4.53764e-05	8.45896e-05	8.70508e-05	7.60388e-05	4.33477e-05	4.44243e-05	3.77439e-05	6.75696e-05	0.000120844	9.0918e-05	9.38001e-05	6.84705e-05	6.18851e-05
K00091	dihydroflavonol-4-reductase [EC:1.1.1.219]	3.82094e-05	3.80872e-05	4.2114e-05	3.57739e-05	3.41473e-05	3.448e-05	7.6592e-05	7.32912e-05	7.47194e-05	5.22601e-05	5.54132e-05	5.37709e-05	5.81048e-05	2.30322e-05	6.06223e-05	2.43603e-05	2.85072e-05	1.65005e-05	3.48516e-05	3.83091e-05	3.60139e-05	6.65996e-05	3.54097e-05	4.95258e-05	0.00012611	0.000131795	0.000112528	0.000101319	0.000105406	0.000106911	6.88494e-05	7.26003e-05	8.32481e-05	4.82292e-05	8.05531e-05	6.06968e-05
K00094	galactitol-1-phosphate 5-dehydrogenase [EC:1.1.1.251]	2.37067e-06	2.05103e-06	2.24573e-06	3.72381e-06	3.62552e-06	3.42163e-06	1.91548e-06	3.11934e-06	2.4496e-06	1.24645e-05	1.43441e-05	1.37136e-05	1.08248e-06	4.2989e-07	3.56022e-06	2.27978e-06	5.28788e-07	3.58854e-06	1.6622e-06	2.14924e-06	2.01116e-06	4.55211e-07	7.23058e-07	5.7977e-07	2.86928e-07	2.20068e-07	3.67835e-07	3.21749e-06	3.49663e-06	2.27575e-06	2.96289e-07	3.36415e-07	5.75028e-07	2.49737e-07	3.06878e-07	6.1437e-07
K00096	glycerol-1-phosphate dehydrogenase [NAD(P)] [EC:1.1.1.261]	9.29542e-05	0.000101853	0.000115623	6.36634e-05	5.70559e-05	6.33844e-05	0.00013902	0.000137619	0.000136145	0.000232579	0.00023548	0.000247108	0.000184184	0.000158821	8.61919e-05	0.000125161	0.000114318	0.00014197	5.16276e-05	0.00010457	4.22186e-05	9.60978e-05	6.78264e-05	8.42801e-05	0.000109668	0.000106107	0.000114389	0.000186285	0.000233209	0.000254347	0.000118947	0.000229651	0.00017596	0.000312848	0.000104301	9.22027e-05
K00097	4-hydroxythreonine-4-phosphate dehydrogenase [EC:1.1.1.262]	0.000143161	0.000139271	0.000141577	0.000132828	0.000133696	0.000135074	0.000149178	0.000155601	0.00015317	0.000154081	0.00016351	0.000158308	0.00011943	0.000103634	0.00012548	0.000118038	0.000107489	0.000124226	0.000152326	0.000149418	0.000157091	0.000149762	0.000137066	0.00014301	0.000179945	0.000182905	0.000172505	0.000176696	0.000178437	0.000180803	0.00015127	0.000127679	0.000142226	0.000108163	0.000160185	0.000146285
K00098	L-idonate 5-dehydrogenase [EC:1.1.1.264]	9.47541e-07	8.95882e-07	1.17219e-06	4.75041e-06	4.7272e-06	4.12116e-06	1.39147e-06	1.81018e-06	1.6503e-06	3.42619e-06	4.92949e-06	3.94677e-06	1.76472e-06	4.15138e-07	2.16775e-05	3.26233e-07	4.2762e-06	1.01549e-06	7.08211e-07	7.27087e-07	6.87272e-07	6.18112e-06	3.24403e-06	4.50769e-06	1.09648e-06	1.37098e-06	1.09231e-06	1.05481e-05	1.31999e-05	1.58904e-05	3.94745e-06	2.10829e-06	2.12407e-06	9.54537e-07	1.91033e-06	1.02939e-06
K00099	1-deoxy-D-xylulose-5-phosphate reductoisomerase [EC:1.1.1.267]	0.000419863	0.000417769	0.000405939	0.000463681	0.000464172	0.000454971	0.000360447	0.000358511	0.000360721	0.000281383	0.000273296	0.000265652	0.000347237	0.000369876	0.000417712	0.000405181	0.00043178	0.000366155	0.000421436	0.000383279	0.000425924	0.000409392	0.000428624	0.000417707	0.000348191	0.000350579	0.000351286	0.000321401	0.000291443	0.000281099	0.00037466	0.000291869	0.000326181	0.000245188	0.000385364	0.000403823
K00100	[EC:1.1.1.-]	0.000912932	0.000913388	0.00094915	0.000931005	0.000910679	0.000904485	0.000897853	0.000902121	0.000898204	0.00105635	0.00105711	0.0010628	0.000929906	0.000788046	0.000896391	0.000880555	0.000866017	0.000862202	0.0008395	0.000942743	0.00084639	0.000909435	0.000825159	0.000872814	0.00090158	0.00090237	0.000909627	0.00112655	0.00122708	0.00122426	0.000851009	0.000901578	0.00090922	0.00106862	0.000917694	0.000885022
K00101	L-lactate dehydrogenase (cytochrome) [EC:1.1.2.3]	0.000152889	0.000148285	0.000142579	0.000138322	0.000143913	0.000146167	0.000114697	0.000119763	0.000116713	9.87155e-05	0.000100648	9.85096e-05	0.000113102	0.000133855	0.000171334	0.000142619	0.000147933	0.000157436	0.000170539	0.000151318	0.000170231	0.000132622	0.000162398	0.000148699	9.94112e-05	9.51046e-05	0.000106088	8.59918e-05	6.57535e-05	6.1741e-05	0.000127284	9.413e-05	0.000103026	8.81367e-05	0.000122688	0.000139212
K00102	D-lactate dehydrogenase (cytochrome) [EC:1.1.2.4]	0.000245004	0.000238342	0.000253311	0.000246687	0.00023968	0.000236335	0.000294139	0.000297386	0.000309985	0.000251577	0.000250166	0.000231142	0.000230194	0.000164269	0.000269948	0.000179808	0.000169441	0.000166733	0.000269622	0.000275263	0.000296385	0.000285876	0.000227511	0.000252702	0.000388211	0.000404681	0.000360119	0.000306812	0.0003219	0.000303318	0.000235559	0.000202938	0.000236957	0.000154967	0.000325575	0.000261962
K00103	L-gulonolactone oxidase [EC:1.1.3.8]	5.63511e-06	4.96371e-06	6.06169e-06	8.02562e-06	7.70181e-06	6.94444e-06	2.19612e-05	1.741e-05	2.06539e-05	4.62144e-06	3.745e-06	4.32284e-06	2.08574e-05	5.91499e-06	4.11545e-05	4.06152e-06	6.30741e-06	2.36274e-06	7.69702e-06	8.31616e-06	8.36854e-06	2.90127e-06	2.54305e-06	2.8204e-06	4.16267e-05	4.34391e-05	3.58193e-05	3.61731e-06	3.19775e-06	3.04686e-06	2.28157e-05	2.22845e-05	2.58073e-05	1.20702e-05	2.26622e-05	1.56209e-05
K00104	glycolate oxidase [EC:1.1.3.15]	0.00076199	0.00074269	0.000748704	0.000811494	0.000807832	0.000796749	0.000811148	0.000830214	0.000839784	0.000712536	0.000735294	0.000697317	0.000648989	0.000615207	0.000747321	0.000660738	0.000636843	0.000643549	0.000815011	0.000774961	0.000854002	0.000834431	0.000779664	0.00079939	0.000936499	0.000959929	0.000893895	0.000768566	0.000752439	0.00075012	0.000771436	0.000622947	0.000698952	0.000493828	0.000869106	0.000786273
K00105	alpha-glycerophosphate oxidase [EC:1.1.3.21]	1.81065e-07	1.8284e-07	2.32458e-07	8.44711e-07	1.05703e-06	6.9824e-07	3.69265e-08	2.41559e-10	8.90527e-09	5.69526e-08	0	8.90259e-08	0	0	4.67278e-07	2.39383e-07	3.09422e-08	3.05352e-10	3.00582e-08	8.25525e-09	3.85526e-08	1.95373e-07	1.79172e-07	2.1323e-07	4.83981e-08	0	0	1.07327e-08	7.27972e-09	4.53303e-10	4.02764e-09	1.42852e-09	6.42141e-09	5.43055e-09	1.85318e-09	1.88981e-08
K00108	choline dehydrogenase [EC:1.1.99.1]	3.5857e-05	3.42085e-05	4.13981e-05	1.73845e-05	1.58978e-05	1.84698e-05	3.49688e-05	3.33319e-05	3.69445e-05	5.60657e-05	5.54279e-05	5.46193e-05	6.51431e-05	1.6423e-05	0.000106841	2.57624e-05	2.72285e-05	4.69424e-05	4.23429e-05	6.35328e-05	4.62779e-05	2.50793e-05	1.87747e-05	2.33793e-05	4.60022e-05	4.55186e-05	4.74324e-05	8.65785e-05	0.000106056	0.00011669	5.51892e-05	4.22759e-05	4.64601e-05	7.887e-05	4.91052e-05	3.68489e-05
K00109	2-hydroxyglutarate dehydrogenase [EC:1.1.99.2]	8.92919e-09	1.25137e-09	1.37845e-08	7.80517e-09	0	1.38344e-10	2.25473e-09	1.70714e-09	1.27846e-08	0	4.14654e-09	1.13736e-09	5.8938e-08	9.91725e-10	1.4253e-06	0	2.18674e-07	2.92738e-08	0	3.19205e-09	0	0	0	0	0	0	0	0	0	6.19987e-09	0	0	1.77738e-08	2.77363e-09	0	7.70404e-10
K00111	glycerol-3-phosphate dehydrogenase [EC:1.1.5.3]	0.000461339	0.00045727	0.000477545	0.000444154	0.000446246	0.000435454	0.000457462	0.000497266	0.000470925	0.000726298	0.000792448	0.000773268	0.000463718	0.000465752	0.000498172	0.000451579	0.000442961	0.00045459	0.000369639	0.000353291	0.000379819	0.000306567	0.000338658	0.00032573	0.000350944	0.000351146	0.00034061	0.000291444	0.00025654	0.000231722	0.000370706	0.000442601	0.000379891	0.000357385	0.000347	0.000345924
K00112	glycerol-3-phosphate dehydrogenase subunit B [EC:1.1.5.3]	3.92689e-05	3.53882e-05	4.0298e-05	2.85955e-05	2.8569e-05	2.68595e-05	9.89776e-05	8.61169e-05	9.91046e-05	3.08363e-05	3.53703e-05	2.8604e-05	7.15876e-05	2.54887e-05	6.11032e-05	2.52838e-05	1.27283e-05	1.95902e-05	5.02421e-05	5.5962e-05	5.60592e-05	2.96936e-05	2.2866e-05	2.76729e-05	0.0001751	0.000182433	0.00015248	3.04064e-05	3.22205e-05	3.79525e-05	9.77514e-05	8.62971e-05	9.99972e-05	6.10596e-05	0.000112667	7.63305e-05
K00113	glycerol-3-phosphate dehydrogenase subunit C [EC:1.1.5.3]	1.21844e-05	1.19108e-05	1.33198e-05	1.07637e-05	1.05276e-05	9.80569e-06	8.07256e-06	8.97853e-06	1.00175e-05	7.27523e-06	7.72149e-06	7.65066e-06	7.47165e-07	3.00005e-06	9.33393e-06	4.35663e-06	2.4856e-06	5.31813e-06	9.76809e-06	1.00599e-05	1.12515e-05	1.4354e-05	1.12643e-05	1.29719e-05	9.51936e-06	9.9872e-06	8.61538e-06	5.44393e-06	3.03363e-06	2.04484e-06	3.15861e-06	4.15866e-06	5.16818e-06	3.46097e-06	1.1637e-05	8.28687e-06
K00114	alcohol dehydrogenase (cytochrome c) [EC:1.1.2.8]	2.61609e-05	2.84453e-05	3.73713e-05	8.64247e-07	8.00732e-07	1.09342e-06	5.90133e-06	7.56612e-06	7.02065e-06	5.97066e-05	5.20003e-05	4.71083e-05	2.20267e-05	6.98291e-06	9.86311e-06	8.94886e-06	5.97988e-06	7.0842e-06	4.02021e-05	5.31406e-05	4.94444e-05	1.80825e-06	1.44066e-06	2.03915e-06	4.43547e-06	4.67769e-06	7.83256e-06	5.70977e-05	7.2445e-05	4.80508e-05	4.42828e-06	6.45381e-06	9.59267e-06	5.54628e-06	5.41354e-06	4.29045e-06
K00115	glucose dehydrogenase (acceptor) [EC:1.1.99.10]	1.88537e-08	9.47626e-09	4.6176e-09	0	0	1.04764e-09	1.70744e-08	0	2.88227e-09	0	3.39819e-08	9.49798e-09	4.4632e-07	7.51004e-09	1.74587e-07	0	0	2.0534e-07	1.52035e-10	0	0	0	0	0	0	0	0	4.44599e-10	0	4.84069e-10	0	3.14678e-10	3.08315e-10	2.16557e-10	1.15151e-09	6.69995e-09
K00116	malate dehydrogenase (quinone) [EC:1.1.5.4]	1.44856e-05	1.49285e-05	1.97987e-05	1.58583e-05	1.52327e-05	1.3294e-05	3.92541e-06	4.13807e-06	3.99072e-06	2.53334e-05	2.18117e-05	2.10995e-05	1.88549e-05	2.93733e-06	7.2473e-05	4.94813e-06	1.29664e-05	7.38e-06	1.7e-05	2.19359e-05	2.08334e-05	3.68711e-06	3.40027e-06	4.2102e-06	1.93231e-06	1.96699e-06	3.28775e-06	2.34777e-05	2.96899e-05	1.97216e-05	1.95826e-06	2.94026e-06	4.66699e-06	2.47604e-06	2.51367e-06	2.61443e-06
K00117	quinoprotein glucose dehydrogenase [EC:1.1.5.2]	4.75149e-05	5.09351e-05	6.53685e-05	8.95715e-06	8.21273e-06	1.00416e-05	2.20204e-05	2.46894e-05	2.38601e-05	0.000107657	9.62615e-05	8.94574e-05	4.4165e-05	1.61427e-05	2.92238e-05	2.20547e-05	1.46667e-05	2.25574e-05	6.98437e-05	9.59346e-05	8.31544e-05	1.93056e-05	1.15075e-05	1.61354e-05	2.4397e-05	2.45867e-05	3.01507e-05	0.000123117	0.000153147	0.000121008	2.16056e-05	2.56533e-05	3.11375e-05	3.90355e-05	2.48137e-05	2.02691e-05
K00118	glucose-fructose oxidoreductase [EC:1.1.99.28]	1.27508e-05	1.27459e-05	1.40194e-05	1.0827e-05	1.06822e-05	9.81195e-06	2.05733e-06	2.63273e-06	1.36287e-06	2.68192e-06	3.40227e-06	3.57393e-06	3.53509e-06	2.42098e-07	8.29166e-06	8.20574e-06	1.28097e-05	1.55395e-06	2.78906e-06	2.75918e-06	2.02461e-06	6.39095e-06	4.32979e-06	6.06742e-06	1.26369e-06	1.09848e-06	1.33111e-06	4.94947e-06	5.12186e-06	5.27401e-06	7.32838e-07	9.63792e-07	1.11015e-06	3.23101e-06	4.74239e-06	6.129e-06
K00119	[EC:1.1.99.-]	2.34101e-05	2.19397e-05	2.52698e-05	1.35572e-05	1.22479e-05	1.45918e-05	2.98161e-05	2.73089e-05	3.04151e-05	3.48742e-05	3.63041e-05	3.65487e-05	4.96647e-05	1.3644e-05	5.77921e-05	2.12545e-05	1.79862e-05	3.94949e-05	2.61256e-05	4.30939e-05	2.65075e-05	2.26889e-05	1.64573e-05	2.0783e-05	4.06203e-05	3.98833e-05	4.1507e-05	6.41717e-05	8.01923e-05	9.55683e-05	4.75328e-05	3.86592e-05	4.12156e-05	7.4723e-05	4.22233e-05	3.23395e-05
K00121	S-(hydroxymethyl)glutathione dehydrogenase / alcohol dehydrogenase [EC:1.1.1.284 1.1.1.1]	7.95268e-05	8.42797e-05	9.90706e-05	6.13059e-05	5.6199e-05	5.49928e-05	6.13464e-05	6.29455e-05	6.39927e-05	0.000108669	0.000104436	9.96054e-05	8.64297e-05	6.02231e-05	0.000128151	5.43817e-05	7.18909e-05	4.49813e-05	5.92863e-05	7.47358e-05	6.61654e-05	4.53753e-05	3.18205e-05	4.07394e-05	5.66029e-05	5.83931e-05	5.47666e-05	8.78918e-05	0.000105498	9.25355e-05	3.98384e-05	7.64979e-05	6.18623e-05	7.71092e-05	5.38981e-05	4.4156e-05
K00122	formate dehydrogenase [EC:1.2.1.2]	4.97521e-05	4.65335e-05	5.66231e-05	2.57441e-05	2.46734e-05	2.52475e-05	8.35409e-05	7.65892e-05	8.64327e-05	5.89523e-05	5.35216e-05	5.33818e-05	6.93049e-05	2.73699e-05	7.44841e-05	2.94887e-05	2.14832e-05	2.42705e-05	6.30363e-05	7.54538e-05	7.21872e-05	2.43616e-05	1.96989e-05	2.30267e-05	0.000139543	0.000145317	0.000123954	6.34655e-05	6.88536e-05	6.68766e-05	8.48388e-05	7.49545e-05	8.52851e-05	6.20327e-05	9.70582e-05	6.5738e-05
K00123	formate dehydrogenase, alpha subunit [EC:1.2.1.2]	0.0025184	0.00252888	0.00256672	0.00282033	0.00274747	0.00270241	0.00370516	0.00347197	0.00368284	0.00330182	0.00334024	0.00330063	0.00373991	0.00301691	0.00319516	0.00280471	0.00260318	0.00277193	0.00256462	0.00285998	0.00261808	0.00274774	0.00243938	0.00257564	0.00447708	0.00459539	0.0042251	0.0033144	0.0035971	0.00370708	0.00364456	0.00387081	0.00392189	0.00374717	0.00369109	0.00320977
K00124	formate dehydrogenase, beta subunit	0.000209265	0.00020807	0.000221552	0.000295379	0.00027597	0.000259797	0.000294476	0.00029418	0.00031392	0.000278972	0.000283516	0.000263411	0.000265417	0.000208885	0.000270126	0.000198709	0.000201594	0.000158644	0.000179315	0.000196179	0.000209161	0.00027716	0.000182455	0.000222061	0.000324237	0.000348674	0.000298026	0.000318437	0.000350733	0.000357044	0.000229376	0.000215431	0.000229599	0.000161985	0.000300593	0.000226373
K00125	formate dehydrogenase, beta subunit [EC:1.2.1.2]	0.000190871	0.000189711	0.000206296	0.000143599	0.00012594	0.000154165	0.000391625	0.00034158	0.000377833	0.000366984	0.000357098	0.000403534	0.000372489	0.000192589	0.000151096	0.000265778	0.000146899	0.000375292	0.000232792	0.00045741	0.000199318	0.000333767	0.000223065	0.0002953	0.000595077	0.000584332	0.000599489	0.000766714	0.000964766	0.00108043	0.000469553	0.000576901	0.000593428	0.00104223	0.000511838	0.000424164
K00126	formate dehydrogenase, delta subunit [EC:1.2.1.2]	3.34843e-08	1.66726e-08	8.69368e-09	2.5452e-10	0	1.84322e-09	3.00407e-08	8.30141e-11	5.67425e-09	0	8.14972e-08	2.41541e-08	7.85256e-07	1.32132e-08	4.50106e-07	0	1.06336e-08	3.61381e-07	9.80421e-10	1.55449e-10	0	0	0	0	0	0	0	4.52119e-09	0	5.07836e-09	1.51113e-10	2.02925e-09	2.71412e-09	2.2719e-09	1.17098e-08	1.81996e-08
K00127	formate dehydrogenase, gamma subunit	5.23399e-05	5.16577e-05	5.17953e-05	0.000102524	9.5895e-05	8.76402e-05	5.94672e-05	6.03564e-05	6.53877e-05	7.90137e-05	7.73643e-05	7.18062e-05	6.90948e-05	6.03269e-05	8.67612e-05	6.58515e-05	7.23e-05	5.00065e-05	4.20783e-05	4.61656e-05	5.1499e-05	8.09763e-05	5.51908e-05	6.39343e-05	3.82593e-05	4.47084e-05	3.90499e-05	9.03651e-05	0.000101059	9.55739e-05	3.87405e-05	2.45966e-05	3.20605e-05	1.79081e-05	6.05719e-05	5.16518e-05
K00128	aldehyde dehydrogenase (NAD+) [EC:1.2.1.3]	0.000627311	0.000616712	0.000629701	0.000621541	0.00062199	0.000624783	0.000705663	0.000679806	0.000694954	0.000632503	0.00062231	0.000620348	0.000736006	0.000545384	0.000941306	0.000578323	0.00058054	0.000631822	0.000708286	0.000743767	0.000721057	0.000665245	0.000645233	0.000655578	0.000875486	0.000881888	0.000850826	0.00077143	0.000804081	0.000786468	0.00074559	0.000682675	0.000751443	0.000689397	0.000755107	0.000708625
K00129	aldehyde dehydrogenase (NAD(P)+) [EC:1.2.1.5]	8.75357e-07	8.81002e-07	1.11956e-06	4.18874e-06	3.99847e-06	3.47346e-06	2.60212e-07	1.55693e-07	1.04135e-07	2.80947e-07	2.11527e-09	4.59426e-07	5.12489e-08	0	1.28731e-06	2.548e-07	2.65763e-07	1.73597e-09	1.42629e-07	4.14978e-08	1.86941e-07	9.68717e-07	8.90694e-07	1.05186e-06	1.19181e-08	9.29449e-09	1.55354e-08	5.39009e-08	3.73008e-08	3.14572e-09	2.92503e-08	2.78543e-08	3.15021e-08	3.83086e-08	6.1014e-08	1.2355e-07
K00130	betaine-aldehyde dehydrogenase [EC:1.2.1.8]	0.00015458	0.000148869	0.000170081	0.000131807	0.00012222	0.000127832	0.000208183	0.000196504	0.000211974	0.000200118	0.000193901	0.000196808	0.000222257	9.03315e-05	0.000335441	0.000117922	0.000110966	0.000155617	0.000170493	0.000234167	0.000179326	0.000175664	0.000126331	0.00015517	0.000305244	0.000309973	0.000291792	0.000310363	0.000369206	0.000383697	0.000207176	0.000216489	0.00023787	0.000303731	0.000252109	0.000197216
K00131	glyceraldehyde-3-phosphate dehydrogenase (NADP) [EC:1.2.1.9]	0.000249789	0.000254056	0.000256891	0.000220835	0.000224057	0.000230896	0.000351471	0.000326637	0.000333338	0.000267219	0.000253073	0.000264395	0.000362152	0.000295468	0.000287819	0.000261224	0.000249032	0.00027075	0.000283961	0.000303909	0.000277705	0.000265089	0.000257281	0.00026241	0.000453976	0.000457527	0.0004341	0.000337686	0.000356976	0.000359022	0.000380676	0.000415378	0.000420757	0.000393338	0.000347568	0.000323716
K00132	acetaldehyde dehydrogenase (acetylating) [EC:1.2.1.10]	0.000331302	0.000324284	0.000308097	0.000313655	0.000327701	0.000332569	0.000253736	0.00026696	0.000251867	0.000196213	0.000187654	0.000193598	0.000225049	0.000307699	0.00025853	0.000322668	0.000324037	0.000332962	0.000375828	0.000327842	0.000370432	0.000302378	0.0003679	0.000336805	0.000215835	0.000205415	0.000233677	0.000203237	0.000153961	0.000138724	0.000274435	0.000215358	0.000231743	0.000196293	0.000265637	0.00031172
K00133	aspartate-semialdehyde dehydrogenase [EC:1.2.1.11]	0.000456941	0.000460921	0.000461489	0.000469445	0.000464234	0.000465544	0.000526463	0.000513437	0.00052109	0.000490686	0.000486995	0.000488296	0.000527602	0.000484717	0.000498434	0.000470301	0.00046707	0.00046662	0.000463748	0.000480355	0.00046309	0.00049397	0.000469866	0.000480238	0.000579398	0.000585017	0.000565689	0.00052717	0.000546099	0.000556651	0.000538008	0.000550037	0.000554796	0.000542132	0.000526749	0.000502977
K00134	glyceraldehyde 3-phosphate dehydrogenase [EC:1.2.1.12]	0.00078915	0.000778186	0.000766694	0.000781572	0.000794307	0.000793518	0.000771086	0.000767568	0.000768751	0.000648916	0.000646866	0.000635727	0.00068661	0.000695519	0.000785228	0.000739374	0.000739478	0.000723614	0.000860175	0.000812664	0.000867968	0.000788083	0.000814976	0.000801001	0.000859692	0.000863156	0.000847474	0.000751402	0.000711851	0.000688143	0.000807818	0.000680958	0.000753085	0.000594808	0.000814852	0.000817955
K00135	succinate-semialdehyde dehydrogenase (NADP+) [EC:1.2.1.16]	0.000343642	0.000340452	0.000377847	0.000298204	0.000280329	0.000292785	0.000455581	0.000434101	0.000457652	0.000459347	0.000446788	0.000452362	0.000459446	0.000250137	0.000582675	0.000283684	0.00026492	0.000338072	0.000369314	0.000488133	0.000380892	0.00044212	0.000326837	0.000387453	0.000638044	0.000646674	0.00061379	0.000685786	0.000804866	0.00082957	0.000459359	0.000501233	0.000533694	0.000648088	0.000524328	0.000428424
K00137	aminobutyraldehyde dehydrogenase [EC:1.2.1.19]	3.55159e-05	3.38466e-05	3.7268e-05	2.56093e-05	2.53099e-05	2.58646e-05	2.36492e-05	2.61612e-05	2.66592e-05	2.81813e-05	2.60462e-05	2.51275e-05	2.46074e-05	1.75124e-05	5.03309e-05	2.28543e-05	2.42567e-05	2.50483e-05	3.77246e-05	3.87857e-05	4.13316e-05	2.41024e-05	2.46802e-05	2.50148e-05	2.44088e-05	2.47214e-05	2.44544e-05	2.83657e-05	2.80028e-05	2.35636e-05	1.79648e-05	1.30158e-05	1.575e-05	1.49249e-05	2.93277e-05	2.61735e-05
K00138	aldehyde dehydrogenase [EC:1.2.1.-]	3.93906e-06	4.20552e-06	5.53858e-06	1.84251e-06	1.75028e-06	1.64286e-06	1.13841e-06	1.45133e-06	1.20228e-06	8.64443e-06	7.45924e-06	6.99274e-06	4.93594e-06	9.52378e-07	1.15693e-05	1.4342e-06	2.0527e-06	1.80614e-06	5.54009e-06	7.27673e-06	6.77317e-06	5.00277e-07	4.50493e-07	5.8323e-07	6.53613e-07	6.94994e-07	1.10528e-06	7.8189e-06	9.86706e-06	6.55242e-06	6.86289e-07	1.01654e-06	1.56756e-06	8.33668e-07	9.56911e-07	9.36399e-07
K00140	malonate-semialdehyde dehydrogenase (acetylating) / methylmalonate-semialdehyde dehydrogenase [EC:1.2.1.18 1.2.1.27]	7.8114e-05	7.90234e-05	9.40893e-05	7.26984e-05	6.73803e-05	6.78826e-05	0.000112383	0.000103811	0.000109879	0.000134704	0.000127822	0.000126784	0.000135759	4.52057e-05	0.000161847	5.13748e-05	4.62596e-05	6.8028e-05	9.36279e-05	0.00012971	0.000102679	8.86012e-05	5.5457e-05	7.35026e-05	0.00017252	0.000177062	0.000163488	0.000199486	0.000238998	0.000228641	0.000112786	0.000123672	0.000138429	0.000141538	0.000123737	9.48178e-05
K00141	benzaldehyde dehydrogenase (NAD) [EC:1.2.1.28]	7.702e-06	7.90191e-06	8.99745e-06	1.20693e-05	1.03619e-05	1.06237e-05	6.0096e-06	7.76772e-06	6.1999e-06	1.34648e-05	1.51212e-05	1.34377e-05	1.49326e-05	2.87204e-06	3.52794e-05	2.69005e-06	7.44569e-06	8.3257e-06	5.94463e-06	6.72649e-06	6.69027e-06	2.16833e-05	1.25864e-05	1.6644e-05	4.74423e-06	5.11624e-06	5.15274e-06	2.36191e-05	2.5963e-05	2.47707e-05	3.04488e-06	4.58633e-06	5.31923e-06	2.39539e-06	5.37854e-06	4.62155e-06
K00145	N-acetyl-gamma-glutamyl-phosphate reductase [EC:1.2.1.38]	0.000306692	0.000302978	0.000307654	0.000314408	0.000308827	0.000309352	0.000325451	0.000322758	0.000328266	0.000348262	0.000352702	0.00035861	0.000311704	0.000278214	0.000298956	0.000311041	0.000293563	0.000319887	0.000293429	0.000330269	0.000291253	0.000335624	0.000303044	0.000321032	0.000346997	0.000347459	0.000347723	0.000405803	0.000442341	0.000464216	0.000328013	0.000329383	0.000338779	0.000406856	0.000348902	0.000331037
K00146	phenylacetaldehyde dehydrogenase [EC:1.2.1.39]	4.66799e-05	4.32175e-05	5.04635e-05	5.23904e-05	4.89452e-05	4.82372e-05	6.43546e-05	6.06018e-05	6.61216e-05	7.16051e-05	7.26679e-05	7.45272e-05	6.85044e-05	2.26942e-05	0.000102982	3.53193e-05	2.6865e-05	5.00139e-05	4.72319e-05	6.65937e-05	5.04712e-05	3.82436e-05	2.98306e-05	3.64975e-05	9.25339e-05	9.39901e-05	8.70138e-05	7.49375e-05	9.07173e-05	9.42475e-05	5.90383e-05	6.19553e-05	6.84125e-05	8.86338e-05	7.40882e-05	5.6531e-05
K00147	glutamate-5-semialdehyde dehydrogenase [EC:1.2.1.41]	0.000282748	0.000278315	0.000278143	0.000342321	0.000334305	0.000322288	0.000275451	0.000279908	0.000283454	0.000280609	0.000291231	0.000278309	0.000247222	0.000227859	0.000322063	0.000266158	0.000279907	0.000229389	0.000253878	0.000242173	0.000265161	0.000314952	0.000282503	0.000293014	0.000283652	0.000293339	0.000273146	0.000272726	0.000270228	0.000267424	0.000259746	0.000206521	0.000235272	0.000161292	0.000288867	0.00027297
K00148	glutathione-independent formaldehyde dehydrogenase [EC:1.2.1.46]	3.18963e-05	3.05333e-05	3.07186e-05	2.43261e-05	2.47252e-05	2.56754e-05	4.14348e-05	3.75608e-05	4.09633e-05	1.84148e-05	1.67147e-05	1.59324e-05	4.30891e-05	2.83293e-05	5.14266e-05	2.67091e-05	2.52999e-05	2.92594e-05	3.81509e-05	3.64929e-05	3.95541e-05	2.81403e-05	3.14771e-05	2.96309e-05	6.01154e-05	6.14696e-05	5.50741e-05	1.53403e-05	1.30242e-05	1.09229e-05	4.26767e-05	3.86664e-05	4.40848e-05	2.65846e-05	4.5072e-05	3.94225e-05
K00150	glyceraldehyde-3-phosphate dehydrogenase (NAD(P)) [EC:1.2.1.59]	0.000129706	0.000143055	0.000158138	8.75989e-05	7.95536e-05	8.90264e-05	0.000183004	0.000176502	0.000180695	0.000243804	0.000233061	0.000247811	0.000239868	0.000225855	0.000119514	0.000165414	0.000159572	0.000184156	9.64545e-05	0.000153754	8.78831e-05	0.000143516	0.000111474	0.000129432	0.000155933	0.000152683	0.000161125	0.000231119	0.000279739	0.000309286	0.000171738	0.000295831	0.000230589	0.000389185	0.000153731	0.000135101
K00151	5-carboxymethyl-2-hydroxymuconic-semialdehyde dehydrogenase [EC:1.2.1.60]	4.97083e-05	4.82318e-05	5.13093e-05	4.77306e-05	4.71315e-05	4.71482e-05	7.77386e-05	6.83959e-05	7.42426e-05	5.10813e-05	4.91046e-05	4.89266e-05	8.88835e-05	4.37982e-05	0.000124513	4.32876e-05	4.50455e-05	5.12936e-05	5.98238e-05	6.75072e-05	6.11981e-05	4.97893e-05	4.5773e-05	4.86273e-05	0.000118299	0.000120727	0.000109615	6.80146e-05	7.49644e-05	7.27988e-05	8.2189e-05	8.18308e-05	9.14061e-05	7.53075e-05	8.31727e-05	7.04364e-05
K00152	salicylaldehyde dehydrogenase [EC:1.2.1.65]	1.87282e-06	2.01442e-06	2.64974e-06	6.49487e-08	6.14203e-08	1.7549e-07	4.35621e-07	5.36437e-07	5.084e-07	4.2145e-06	3.87e-06	3.39413e-06	2.06333e-06	4.89991e-07	1.75884e-06	6.32368e-07	5.74724e-07	7.35033e-07	2.84317e-06	3.75963e-06	3.49536e-06	2.1945e-08	2.08799e-08	6.21221e-08	3.1378e-07	3.30916e-07	5.53112e-07	4.06592e-06	5.12402e-06	3.43046e-06	3.01293e-07	4.48036e-07	6.72598e-07	4.05596e-07	4.49604e-07	3.44089e-07
K00153	S-(hydroxymethyl)mycothiol dehydrogenase [EC:1.1.1.306]	7.53262e-05	7.51182e-05	7.10575e-05	6.88099e-05	7.16871e-05	7.2942e-05	5.40548e-05	5.4391e-05	5.3613e-05	4.11816e-05	3.89791e-05	3.81228e-05	5.51253e-05	7.19105e-05	9.4169e-05	7.30152e-05	8.00277e-05	7.69667e-05	8.81521e-05	7.76951e-05	8.70328e-05	6.39844e-05	8.27918e-05	7.40187e-05	4.62909e-05	4.36137e-05	5.07681e-05	4.08544e-05	2.96652e-05	2.44161e-05	6.37717e-05	4.97419e-05	5.40144e-05	4.50712e-05	5.74479e-05	6.96146e-05
K00154	coniferyl-aldehyde dehydrogenase [EC:1.2.1.68]	6.0104e-05	5.87505e-05	6.08872e-05	9.18792e-05	8.95327e-05	8.41808e-05	5.66572e-05	6.23535e-05	5.93541e-05	0.000124585	0.000132503	0.000130162	6.27403e-05	5.15015e-05	9.22714e-05	6.4909e-05	6.07946e-05	7.03309e-05	5.64177e-05	6.39512e-05	6.10996e-05	7.12766e-05	6.18746e-05	6.48403e-05	3.88076e-05	3.94831e-05	4.24752e-05	9.79396e-05	0.000101691	8.96163e-05	4.3644e-05	3.90768e-05	4.46068e-05	4.653e-05	4.9964e-05	5.14393e-05
K00155	[EC:1.2.1.-]	3.0225e-05	3.09993e-05	3.34583e-05	2.97988e-05	2.7221e-05	2.87401e-05	6.2672e-05	5.4172e-05	5.93134e-05	4.33388e-05	4.38234e-05	4.73819e-05	6.91782e-05	2.4963e-05	7.98705e-05	2.94377e-05	2.83523e-05	3.96087e-05	2.98861e-05	4.84572e-05	2.75147e-05	4.46565e-05	2.77786e-05	3.75649e-05	0.000102699	0.000104493	9.59489e-05	8.63974e-05	0.000103935	0.000112982	6.87776e-05	8.01946e-05	8.61993e-05	0.000100768	7.26002e-05	5.77672e-05
K00156	pyruvate dehydrogenase (quinone) [EC:1.2.5.1]	2.7936e-05	2.90659e-05	3.53807e-05	2.27552e-05	2.11898e-05	2.12286e-05	2.33516e-05	2.50636e-05	2.48384e-05	5.14173e-05	4.8315e-05	4.8702e-05	3.53695e-05	1.68614e-05	8.90602e-05	1.65031e-05	2.49008e-05	2.39636e-05	2.84993e-05	3.90472e-05	3.19151e-05	3.03474e-05	1.90043e-05	2.50536e-05	2.26944e-05	2.30222e-05	2.41873e-05	6.58079e-05	7.5202e-05	6.8158e-05	1.67491e-05	2.68831e-05	2.71608e-05	3.54727e-05	2.30334e-05	1.9175e-05
K00158	pyruvate oxidase [EC:1.2.3.3]	4.96834e-05	5.0447e-05	5.50109e-05	4.51858e-05	3.97801e-05	4.64412e-05	9.08499e-05	8.02739e-05	8.75697e-05	9.83815e-05	9.42282e-05	0.000109211	8.88324e-05	4.86237e-05	3.67405e-05	7.01261e-05	4.01828e-05	0.000100018	5.81244e-05	0.000118838	4.86759e-05	9.2618e-05	6.26629e-05	8.23005e-05	0.000131893	0.000127728	0.000137029	0.00020617	0.000258922	0.000287295	0.000108516	0.000141411	0.000143475	0.000274103	0.000122006	0.000104058
K00161	pyruvate dehydrogenase E1 component subunit alpha [EC:1.2.4.1]	0.000326325	0.000318792	0.000314385	0.000363428	0.000365524	0.000360283	0.00036954	0.000387722	0.000370976	0.00049326	0.000553869	0.000535566	0.000308458	0.00029094	0.000365661	0.000318107	0.00029647	0.000329658	0.000302072	0.000275183	0.000299323	0.000313008	0.000312392	0.000310518	0.000403467	0.000406735	0.000381591	0.000310406	0.000282636	0.000266172	0.000335849	0.000332843	0.000346812	0.000243998	0.000323766	0.000323852
K00162	pyruvate dehydrogenase E1 component subunit beta [EC:1.2.4.1]	0.000459965	0.00045236	0.000438761	0.000489516	0.000496906	0.000494892	0.000454628	0.00047758	0.000455587	0.000577716	0.000637053	0.000619378	0.000397455	0.00042302	0.000458905	0.000453438	0.000430011	0.000479125	0.000454065	0.00040995	0.000446681	0.000434446	0.000466132	0.000449186	0.000453658	0.000449751	0.000446114	0.00039453	0.000347757	0.000326133	0.000438049	0.00041512	0.000431512	0.000334867	0.000411931	0.000441262
K00163	pyruvate dehydrogenase E1 component [EC:1.2.4.1]	2.09369e-05	2.10447e-05	2.81795e-05	1.46703e-06	9.88417e-07	1.50729e-06	5.72596e-06	5.76738e-06	6.6296e-06	4.25521e-05	3.9729e-05	3.43836e-05	5.28599e-05	5.48305e-06	0.000167453	6.55062e-06	2.73982e-05	2.23409e-05	2.88581e-05	3.81825e-05	3.52879e-05	3.60725e-07	4.0793e-07	8.90146e-07	3.19985e-06	3.35081e-06	5.63122e-06	4.07662e-05	5.1716e-05	3.46172e-05	3.22655e-06	4.90145e-06	8.27318e-06	4.10801e-06	3.94929e-06	3.98178e-06
K00164	2-oxoglutarate dehydrogenase E1 component [EC:1.2.4.2]	6.51488e-05	6.68956e-05	7.86453e-05	5.4629e-05	5.11924e-05	4.90746e-05	0.000143612	0.000120687	0.000134894	9.28462e-05	8.83949e-05	8.3905e-05	0.000161762	5.56959e-05	0.000281078	3.70846e-05	5.30628e-05	3.59843e-05	7.62045e-05	8.87656e-05	8.47401e-05	5.59239e-05	3.34898e-05	4.5191e-05	0.000252879	0.000264161	0.000222212	0.000110588	0.000127878	0.000111779	0.000152141	0.000165248	0.000188698	8.74261e-05	0.000141067	0.000102201
K00166	2-oxoisovalerate dehydrogenase E1 component, alpha subunit [EC:1.2.4.4]	2.07444e-05	2.09496e-05	2.24029e-05	3.01911e-05	2.97127e-05	2.77499e-05	1.59914e-05	1.87078e-05	1.599e-05	3.85416e-05	4.27687e-05	4.2996e-05	1.95001e-05	1.96255e-05	2.18788e-05	1.97457e-05	1.99135e-05	2.00346e-05	9.89648e-06	8.51536e-06	9.38081e-06	1.69066e-05	1.54069e-05	1.63258e-05	5.9663e-06	5.60019e-06	6.40974e-06	1.66012e-05	1.53469e-05	1.44711e-05	9.31168e-06	1.69135e-05	1.17488e-05	1.42736e-05	7.85462e-06	1.04149e-05
K00167	2-oxoisovalerate dehydrogenase E1 component, beta subunit [EC:1.2.4.4]	0.000187921	0.000184954	0.000176258	0.000198759	0.000202816	0.000202471	0.000189291	0.000189251	0.000186698	0.00018819	0.000202608	0.000197743	0.000173128	0.000182365	0.000191784	0.000187284	0.000175756	0.000198463	0.000201407	0.0001783	0.000198231	0.000165598	0.000197043	0.000182033	0.000203135	0.000201388	0.000198104	0.000119938	9.41284e-05	8.46123e-05	0.000198458	0.000177744	0.000189848	0.000135788	0.000179278	0.000191862
K00169	pyruvate ferredoxin oxidoreductase, alpha subunit [EC:1.2.7.1]	0.000300839	0.000340351	0.000377565	0.000269866	0.000246251	0.000258389	0.00058721	0.00054614	0.000566364	0.000717258	0.000698205	0.000724961	0.000766416	0.000637936	0.000400643	0.000441709	0.000439732	0.000456544	0.000210336	0.000361279	0.000188628	0.000400387	0.000260311	0.000326032	0.000590735	0.000600261	0.000574379	0.000741709	0.000897598	0.000978703	0.000555711	0.000899703	0.000734546	0.00103454	0.0004752	0.000392146
K00170	pyruvate ferredoxin oxidoreductase, beta subunit [EC:1.2.7.1]	0.000213425	0.000242743	0.000271929	0.00018413	0.000166973	0.000175816	0.000439887	0.000407007	0.000422802	0.000531862	0.00051629	0.000537195	0.000577325	0.00047288	0.000298208	0.000320523	0.00032018	0.00032838	0.000143914	0.000256577	0.000128171	0.000287401	0.000181007	0.000230101	0.000448926	0.000457275	0.000433393	0.000541359	0.000657048	0.000715964	0.000413696	0.000675411	0.000550498	0.000765754	0.000350979	0.000285394
K00171	pyruvate ferredoxin oxidoreductase, delta subunit [EC:1.2.7.1]	6.12898e-05	6.86343e-05	7.88387e-05	3.57691e-05	3.24442e-05	3.35263e-05	9.16329e-05	8.80683e-05	9.02144e-05	0.000124135	0.000122708	0.000124815	0.000129189	0.000119273	6.41203e-05	7.51678e-05	8.23541e-05	6.62788e-05	2.73698e-05	4.15673e-05	2.57581e-05	3.7627e-05	2.69754e-05	3.23829e-05	7.38746e-05	7.59058e-05	6.84146e-05	6.03315e-05	7.36101e-05	7.99825e-05	7.24789e-05	0.000146143	0.000103857	0.000138602	5.84658e-05	4.6744e-05
K00172	pyruvate ferredoxin oxidoreductase, gamma subunit [EC:1.2.7.1]	9.12586e-05	0.000102029	0.000108573	0.000115121	0.000104683	0.00010612	0.000202265	0.00018193	0.000194411	0.000221206	0.000216897	0.000225446	0.000251107	0.000185391	0.000145344	0.000146512	0.000137366	0.000153684	7.49973e-05	0.000133726	6.75173e-05	0.000152929	9.92118e-05	0.000123983	0.000230748	0.000235708	0.000223701	0.000282862	0.000345854	0.000381021	0.000211571	0.000289865	0.000260537	0.000353576	0.000187608	0.000153815
K00174	2-oxoglutarate ferredoxin oxidoreductase subunit alpha [EC:1.2.7.3]	0.00148884	0.0015182	0.00150132	0.0014514	0.00144776	0.00146223	0.00159437	0.00154887	0.0015758	0.00145961	0.00144405	0.00144729	0.00167036	0.00169735	0.00141729	0.0015838	0.00158787	0.00157877	0.00149246	0.00150947	0.0014651	0.00149573	0.00152744	0.00151166	0.00159805	0.00159368	0.00159494	0.00146224	0.00147001	0.00152491	0.00165772	0.00174925	0.00168233	0.00178996	0.00155859	0.00156132
K00175	2-oxoglutarate ferredoxin oxidoreductase subunit beta [EC:1.2.7.3]	0.000682727	0.000695561	0.000689143	0.000702849	0.000693134	0.000693676	0.000760767	0.000734589	0.000757379	0.000680334	0.000678077	0.000671747	0.000780746	0.000763693	0.000676452	0.000725117	0.000724301	0.000706622	0.000672836	0.000689403	0.000667483	0.000702037	0.000690173	0.000694709	0.000790298	0.000796148	0.000777625	0.000691996	0.000705564	0.000733996	0.000772668	0.000803343	0.0007864	0.000815273	0.000756767	0.000733174
K00176	2-oxoglutarate ferredoxin oxidoreductase subunit delta [EC:1.2.7.3]	0.000122064	0.000120983	0.000123316	9.94794e-05	0.000100483	0.000101876	0.000130332	0.000124617	0.00013043	9.65434e-05	9.3279e-05	9.42277e-05	0.000127399	0.000124298	0.000104207	0.000118356	0.000115546	0.000113231	0.000121731	0.00012278	0.000121589	9.9416e-05	0.00010675	0.000104899	0.000147241	0.000148365	0.000141631	9.44391e-05	9.63644e-05	0.000104007	0.000136995	0.000139887	0.000136035	0.000135868	0.000136164	0.000127061
K00177	2-oxoglutarate ferredoxin oxidoreductase subunit gamma [EC:1.2.7.3]	0.000485735	0.000497849	0.000491075	0.000482436	0.000480854	0.000480514	0.000499486	0.000482454	0.000493703	0.000446225	0.000432376	0.000432703	0.000554701	0.00058368	0.000477228	0.000526546	0.000547596	0.000504624	0.000470968	0.000460481	0.00046558	0.000463089	0.000483473	0.000472266	0.000463091	0.000463936	0.000464492	0.00041094	0.000400149	0.000405613	0.000508837	0.000546775	0.000514463	0.000520509	0.000473957	0.000484974
K00179	indolepyruvate ferredoxin oxidoreductase, alpha subunit [EC:1.2.7.8]	0.00111855	0.00115589	0.00117108	0.00101928	0.00101515	0.00102798	0.00127842	0.0012463	0.00126508	0.0013235	0.00131299	0.00131927	0.00143408	0.00148318	0.00110209	0.00122631	0.00123587	0.00123462	0.00104837	0.00107862	0.00103124	0.00110586	0.00109974	0.0010976	0.00120439	0.0012065	0.00118919	0.00106876	0.00108957	0.00112403	0.00125834	0.00155518	0.00137625	0.00149572	0.00113639	0.0011125
K00180	indolepyruvate ferredoxin oxidoreductase, beta subunit [EC:1.2.7.8]	0.000328198	0.000339712	0.000345639	0.000294983	0.000295209	0.000297867	0.000351517	0.000347783	0.000348843	0.000388288	0.000381376	0.000386186	0.000413756	0.000449074	0.000320089	0.000362541	0.000376751	0.000359542	0.000294777	0.000294541	0.000290282	0.000302734	0.00030905	0.000304385	0.000291907	0.000291384	0.000293101	0.0002849	0.000283793	0.000290821	0.00033986	0.000435672	0.000369428	0.000406184	0.000296035	0.00029995
K00183	molybdopterin oxidoreductase, molybdopterin binding subunit [EC:1.2.7.-]	2.03914e-05	2.09773e-05	2.19955e-05	2.93763e-05	2.85452e-05	2.75431e-05	1.80142e-05	1.69546e-05	1.76018e-05	1.88859e-05	1.73397e-05	1.99101e-05	1.7786e-05	1.85246e-05	1.33281e-05	1.85884e-05	1.59964e-05	2.03456e-05	1.85275e-05	2.09274e-05	1.80986e-05	1.93016e-05	1.97288e-05	2.02847e-05	1.75185e-05	1.69293e-05	1.82627e-05	2.31547e-05	2.45596e-05	2.888e-05	2.36873e-05	2.31553e-05	2.18165e-05	3.0861e-05	1.93584e-05	1.87465e-05
K00184	molybdopterin oxidoreductase, iron-sulfur binding subunit [EC:1.2.7.-]	0.000106261	0.000101018	0.000108223	9.96216e-05	9.64421e-05	9.61306e-05	0.000142393	0.00014257	0.000151535	8.28694e-05	8.76286e-05	8.14041e-05	8.25467e-05	6.18061e-05	7.97736e-05	6.7192e-05	5.32801e-05	6.1444e-05	0.000115953	0.000115688	0.000125795	0.000120295	9.25115e-05	0.00010714	0.000210627	0.000219979	0.000189642	0.000135222	0.000145673	0.000164069	0.000141033	0.00011527	0.000131257	8.15449e-05	0.000169292	0.000125503
K00185	molybdopterin oxidoreductase, membrane subunit [EC:1.2.7.-]	0.000123532	0.00011241	0.000127789	9.68935e-05	9.10594e-05	9.06049e-05	0.000214739	0.000206131	0.000229828	9.06637e-05	9.76479e-05	8.58372e-05	0.000119566	5.3874e-05	0.000101177	6.38452e-05	3.35174e-05	4.80503e-05	0.000138757	0.000147813	0.000158214	0.000112702	7.72258e-05	9.7187e-05	0.000356386	0.000374463	0.000311239	0.000131645	0.00014799	0.000179517	0.000208706	0.000165291	0.000192992	0.00011385	0.000261437	0.00017158
K00186	2-oxoisovalerate ferredoxin oxidoreductase, alpha subunit [EC:1.2.7.7]	0.000220052	0.000229944	0.000231724	0.000175443	0.000179627	0.000183406	0.000240506	0.000232809	0.000233737	0.000222445	0.000208789	0.000212226	0.000295632	0.000324668	0.000229444	0.000241228	0.000263132	0.000231061	0.000209987	0.000189005	0.000207442	0.0001801	0.000209305	0.000192863	0.000209035	0.000209174	0.00020399	0.000115683	9.2039e-05	8.34364e-05	0.00023881	0.000302385	0.000254422	0.000230236	0.000189754	0.000198789
K00187	2-oxoisovalerate ferredoxin oxidoreductase, beta subunit [EC:1.2.7.7]	5.39291e-05	6.27728e-05	6.9515e-05	4.69731e-05	4.09464e-05	4.00761e-05	6.01981e-05	6.17321e-05	6.34255e-05	9.32194e-05	8.9917e-05	8.81354e-05	9.58155e-05	0.000109846	5.69045e-05	6.49346e-05	8.12477e-05	5.05221e-05	1.95018e-05	2.17691e-05	2.26763e-05	4.85165e-05	3.9543e-05	4.15199e-05	1.8989e-05	2.15652e-05	1.68351e-05	1.10973e-05	1.23419e-05	1.51296e-05	4.18466e-05	9.30867e-05	5.45892e-05	7.32999e-05	3.02463e-05	2.36442e-05
K00188	2-oxoisovalerate ferredoxin oxidoreductase, delta subunit [EC:1.2.7.7]	1.48905e-05	1.89465e-05	2.29473e-05	2.48995e-06	1.84838e-06	2.54969e-06	2.02408e-05	2.10075e-05	1.97819e-05	4.01988e-05	3.79328e-05	3.88294e-05	4.06592e-05	4.72187e-05	1.65886e-05	2.0792e-05	2.77785e-05	1.75363e-05	7.94621e-07	1.51748e-06	5.33145e-07	5.99532e-06	4.39236e-06	4.52379e-06	3.3199e-07	4.89611e-07	1.75984e-07	1.95016e-06	2.10555e-06	1.06635e-06	9.68238e-06	4.40559e-05	2.17064e-05	3.29373e-05	2.94976e-07	2.72785e-07
K00189	2-oxoisovalerate ferredoxin oxidoreductase, gamma subunit [EC:1.2.7.7]	2.0359e-05	2.54165e-05	3.11999e-05	2.58149e-06	2.21611e-06	2.90902e-06	2.77173e-05	2.86825e-05	2.69978e-05	5.45847e-05	5.20045e-05	5.31727e-05	5.57422e-05	6.37836e-05	2.27218e-05	2.84937e-05	3.76452e-05	2.40416e-05	9.4508e-07	1.9305e-06	5.17835e-07	5.26953e-07	1.00276e-07	1.49171e-07	3.01386e-07	4.54064e-07	1.42303e-07	2.64295e-06	2.77045e-06	1.39519e-06	1.23526e-05	5.95335e-05	2.86649e-05	4.4979e-05	0	3.59991e-08
K00190	carbon monoxide dehydrogenase / acetyl-CoA synthase subunit beta [EC:1.2.7.4 1.2.99.2 2.3.1.169]	0.000110038	0.000108524	0.000102822	0.000105557	0.000110879	0.000111205	8.13355e-05	7.98319e-05	7.89427e-05	5.93069e-05	5.40618e-05	5.88283e-05	8.23449e-05	0.000107694	8.76552e-05	0.000110615	0.00011052	0.000116028	0.000125544	0.000113218	0.000121475	0.000100378	0.00012497	0.000113707	7.24404e-05	6.87918e-05	7.89986e-05	8.24717e-05	7.9162e-05	8.72409e-05	0.000116021	8.94214e-05	9.42392e-05	8.6164e-05	9.18075e-05	0.000106853
K00192	acetyl-CoA decarbonylase/synthase complex subunit alpha [EC:1.2.99.2]	3.14539e-05	3.695e-05	3.65621e-05	3.40518e-05	2.558e-05	3.33311e-05	6.12308e-05	5.42011e-05	5.93918e-05	7.07455e-05	6.34471e-05	7.4025e-05	6.17175e-05	4.21807e-05	2.16441e-05	4.74422e-05	3.11658e-05	6.91178e-05	3.86916e-05	8.1027e-05	3.21003e-05	0.000133112	9.60798e-05	0.000110686	9.11124e-05	8.86791e-05	9.44679e-05	0.000142355	0.000180447	0.000200433	8.39962e-05	0.000106442	0.000109765	0.000192936	8.60884e-05	7.38929e-05
K00193	acetyl-CoA decarbonylase/synthase complex subunit beta [EC:2.3.1.-]	5.53363e-05	5.80047e-05	5.80492e-05	5.40591e-05	4.91605e-05	5.60156e-05	8.47561e-05	7.80153e-05	8.20277e-05	0.000100556	9.73563e-05	0.000107836	8.37331e-05	6.36768e-05	4.17482e-05	7.41131e-05	5.24939e-05	0.000100029	6.42278e-05	0.000107201	5.58735e-05	0.000131457	0.000101438	0.000115093	0.000111331	0.000107617	0.000116885	0.000178891	0.000219278	0.000242902	0.000108823	0.000129694	0.000131873	0.000224042	0.000107821	9.81102e-05
K00194	acetyl-CoA decarbonylase/synthase complex subunit delta [EC:2.1.1.245]	0.000234364	0.000231473	0.000221542	0.000221415	0.000226605	0.000234208	0.000264878	0.000249619	0.000255835	0.000230641	0.00022955	0.000242734	0.000255155	0.00024477	0.000220048	0.00025887	0.000226758	0.000294782	0.000276106	0.000295466	0.000263145	0.00027662	0.000294937	0.00028594	0.000317301	0.000310774	0.000319248	0.000282999	0.000294958	0.000312655	0.000322345	0.000304433	0.000324448	0.000363925	0.000292193	0.000296823
K00195	acetyl-CoA decarbonylase/synthase complex subunit epsilon	4.21465e-06	5.13541e-06	4.90981e-06	4.83278e-06	3.5918e-06	4.75961e-06	8.17583e-06	7.14171e-06	7.82313e-06	9.90468e-06	8.40248e-06	9.77633e-06	8.23523e-06	6.58517e-06	2.87417e-06	6.32511e-06	3.86141e-06	9.22268e-06	5.20386e-06	1.07613e-05	4.33611e-06	2.53656e-05	1.86365e-05	2.05606e-05	1.20481e-05	1.16797e-05	1.26428e-05	1.8938e-05	2.40665e-05	2.66547e-05	1.20769e-05	1.49638e-05	1.55854e-05	2.56948e-05	1.1524e-05	9.99762e-06
K00196	carbon-monoxide dehydrogenase iron sulfur subunit	7.28956e-06	7.67014e-06	8.38522e-06	9.27446e-06	8.69057e-06	8.51206e-06	8.95091e-06	1.20914e-05	9.95206e-06	3.20485e-05	3.65311e-05	3.58459e-05	9.31533e-06	1.11843e-05	6.63506e-06	9.33488e-06	8.70619e-06	1.04461e-05	8.33349e-07	9.31935e-07	7.0623e-07	5.37179e-06	3.54044e-06	4.15911e-06	1.33632e-06	1.35074e-06	1.20297e-06	1.00473e-05	9.3232e-06	8.71416e-06	2.58603e-06	1.03973e-05	5.41216e-06	8.18092e-06	1.32621e-06	1.86043e-06
K00197	acetyl-CoA decarbonylase/synthase complex subunit gamma [EC:2.1.1.245]	0.000335082	0.000330136	0.000319028	0.00032652	0.000331062	0.000342304	0.000399635	0.000383373	0.000389622	0.000384097	0.000391723	0.000408501	0.000367406	0.000340496	0.000311668	0.000367668	0.000314427	0.000422508	0.000387688	0.000425167	0.000369943	0.000412659	0.000414913	0.000413637	0.000485141	0.000477868	0.000484579	0.000470703	0.000498312	0.000527831	0.000465223	0.000449792	0.00047863	0.000545452	0.000435717	0.000431382
K00198	carbon-monoxide dehydrogenase catalytic subunit [EC:1.2.99.2]	0.000967574	0.00094299	0.000919751	0.000879644	0.000908337	0.000924131	0.00100202	0.000976789	0.00098879	0.000822223	0.000825927	0.000850327	0.000910667	0.000936469	0.000848302	0.000972788	0.000882782	0.00104419	0.00108218	0.00106523	0.00106161	0.000895395	0.00102109	0.000968072	0.00113679	0.0011231	0.00112602	0.000829706	0.000796885	0.000832938	0.00113232	0.00103033	0.00108474	0.00105539	0.00106687	0.00107347
K00200	formylmethanofuran dehydrogenase subunit A [EC:1.2.99.5]	0.000189443	0.000193357	0.000207451	0.000148294	0.000127647	0.000161898	0.000380371	0.000329497	0.000361876	0.000415688	0.000398493	0.000458656	0.000385254	0.000211824	0.000134054	0.000293693	0.000163239	0.000430548	0.000231556	0.000493862	0.000186007	0.000413839	0.000278253	0.000360004	0.000556268	0.000536734	0.000581835	0.000885326	0.0011165	0.00124468	0.000472846	0.000615014	0.000622966	0.00118844	0.000510122	0.000439194
K00201	formylmethanofuran dehydrogenase subunit B [EC:1.2.99.5]	0.000160221	0.000164689	0.000176501	0.000126459	0.000108256	0.000137442	0.000320201	0.000277835	0.000304692	0.00035304	0.000337179	0.000387959	0.000326349	0.000185262	0.000114019	0.000247925	0.000139605	0.00036186	0.000193968	0.000413291	0.000155936	0.000369682	0.000251027	0.000319567	0.000465244	0.00044893	0.000486757	0.000741155	0.00093423	0.00104095	0.000399265	0.000521645	0.000526477	0.00099765	0.000427139	0.000367875
K00202	formylmethanofuran dehydrogenase subunit C [EC:1.2.99.5]	9.96883e-05	0.000103465	0.000110134	8.11509e-05	6.80183e-05	8.66838e-05	0.000199013	0.000173811	0.000190684	0.000216316	0.000206919	0.000238481	0.000200879	0.000110979	6.96976e-05	0.000152857	8.85196e-05	0.00022352	0.000121784	0.000258271	9.87139e-05	0.000223001	0.000150971	0.000194281	0.000291012	0.0002815	0.000303263	0.000459206	0.000579474	0.000645747	0.000246373	0.000320216	0.000324825	0.000617589	0.000267921	0.000229851
K00203	formylmethanofuran dehydrogenase subunit D [EC:1.2.99.5]	4.74433e-05	4.88234e-05	5.21321e-05	3.78639e-05	3.22084e-05	4.10255e-05	9.51669e-05	8.25714e-05	9.06616e-05	0.000104255	9.96072e-05	0.000114737	9.60959e-05	5.39329e-05	3.33605e-05	7.35275e-05	4.12602e-05	0.000107618	5.8072e-05	0.000123757	4.67294e-05	0.000110685	7.52011e-05	9.57892e-05	0.000139381	0.00013455	0.000145718	0.000221576	0.000279534	0.000311549	0.000119248	0.000154776	0.000156988	0.000297649	0.00012803	0.000110194
K00204	formylmethanofuran dehydrogenase subunit H [EC:1.2.99.5]	3.04102e-08	2.16602e-07	1.42487e-07	4.41321e-07	2.01653e-07	2.73348e-07	6.53278e-08	2.36765e-07	1.65987e-07	1.13097e-07	1.67938e-09	8.32441e-08	4.06881e-08	0	3.61078e-08	5.81259e-08	4.95514e-07	0	6.17746e-08	1.18359e-07	9.68454e-08	1.19294e-07	1.14591e-07	2.03584e-07	1.56475e-07	2.17627e-07	4.74761e-08	3.14028e-08	6.21334e-08	6.64919e-08	4.12145e-08	8.51226e-08	1.01629e-07	1.40199e-07	2.56499e-07	1.50437e-07
K00205	formylmethanofuran dehydrogenase subunit F [EC:1.2.99.5]	8.40483e-05	8.70355e-05	9.04083e-05	7.87083e-05	6.89087e-05	8.06381e-05	0.000147157	0.000131936	0.000143027	0.000165744	0.000159573	0.000180387	0.000146516	9.4103e-05	7.22232e-05	0.000119926	7.86743e-05	0.000165636	9.65948e-05	0.000183882	8.25177e-05	0.000184458	0.000133897	0.000161354	0.000201371	0.000195439	0.000209682	0.000309232	0.000383867	0.000425221	0.000175776	0.000222395	0.000226038	0.000412493	0.000191086	0.000166675
K00207	dihydropyrimidine dehydrogenase (NADP+) [EC:1.3.1.2]	1.48402e-06	1.61148e-06	1.87781e-06	2.62391e-06	2.5007e-06	2.30739e-06	2.0484e-06	2.48912e-06	1.65459e-06	2.3405e-06	2.76966e-06	2.77637e-06	6.54951e-06	2.66329e-06	4.53447e-06	1.74747e-06	2.27167e-06	2.81931e-06	2.69401e-07	2.71785e-07	2.66886e-07	6.24169e-07	5.77908e-07	6.22969e-07	9.91689e-08	1.00565e-07	1.42342e-07	2.27554e-07	1.66821e-07	1.73299e-07	6.8149e-07	2.82533e-06	1.49408e-06	2.07132e-06	6.55096e-07	5.76963e-07
K00208	enoyl-[acyl-carrier protein] reductase I [EC:1.3.1.9]	4.81501e-05	4.78274e-05	5.50157e-05	4.85679e-05	4.47805e-05	4.48638e-05	3.89587e-05	4.85583e-05	4.63881e-05	5.76815e-05	5.95737e-05	5.55455e-05	1.86978e-05	1.51231e-05	4.55636e-05	2.02038e-05	2.1377e-05	2.07079e-05	4.41729e-05	4.82432e-05	5.15972e-05	6.19091e-05	3.63231e-05	4.91035e-05	4.16329e-05	4.43134e-05	4.01426e-05	8.71545e-05	9.49876e-05	9.59565e-05	2.25551e-05	1.93469e-05	2.12403e-05	2.0343e-05	4.61046e-05	3.19052e-05
K00210	prephenate dehydrogenase [EC:1.3.1.12]	0	0	0	6.26669e-09	6.66999e-09	3.24842e-08	0	0	0	0	1.81871e-08	6.23573e-09	0	0	7.96663e-08	3.00003e-10	0	0	5.23075e-10	0	0	0	0	0	7.23039e-11	0	0	3.13235e-09	0	3.41043e-09	0	1.08265e-09	1.06076e-09	1.52572e-09	8.11276e-09	5.14036e-09
K00214	biliverdin reductase [EC:1.3.1.24]	2.28259e-06	2.66289e-06	3.16635e-06	4.72665e-07	4.47906e-07	4.75691e-07	2.08785e-06	2.13645e-06	2.00679e-06	4.07516e-06	3.91794e-06	4.00351e-06	4.31523e-06	4.73663e-06	2.4167e-06	2.60335e-06	3.51061e-06	1.87123e-06	2.78199e-07	3.50244e-07	1.90009e-07	1.84069e-07	1.37748e-07	1.95846e-07	5.86303e-08	5.52638e-08	4.12005e-08	2.11359e-07	2.1799e-07	1.17341e-07	9.53082e-07	4.44993e-06	2.19867e-06	3.56266e-06	2.39601e-07	3.65912e-07
K00215	dihydrodipicolinate reductase [EC:1.3.1.26]	0.000610111	0.000601325	0.000583729	0.000597226	0.000605125	0.000610279	0.000516457	0.000519922	0.000516315	0.000483516	0.000483048	0.000488762	0.000478189	0.000538034	0.000551746	0.00060625	0.000601958	0.00061743	0.000639427	0.000623433	0.000628463	0.000594678	0.000644035	0.000623915	0.000503484	0.00049101	0.000525144	0.000539253	0.000518293	0.000518866	0.000561633	0.000482025	0.000521341	0.000546075	0.000565446	0.000609621
K00216	2,3-dihydro-2,3-dihydroxybenzoate dehydrogenase [EC:1.3.1.28]	2.13886e-05	2.09466e-05	2.136e-05	3.33894e-05	3.2673e-05	3.08429e-05	1.79051e-05	2.02153e-05	1.87314e-05	4.21496e-05	4.57449e-05	4.46664e-05	2.2776e-05	1.93265e-05	4.15769e-05	2.21243e-05	2.27545e-05	2.51615e-05	1.88061e-05	1.85387e-05	2.0056e-05	2.16529e-05	2.05223e-05	2.07268e-05	9.4498e-06	9.51481e-06	1.06879e-05	2.66304e-05	2.61358e-05	2.17772e-05	1.3467e-05	1.21857e-05	1.3071e-05	9.8147e-06	1.29705e-05	1.53483e-05
K00217	maleylacetate reductase [EC:1.3.1.32]	1.70247e-07	6.99011e-08	8.49699e-08	2.62087e-08	0	7.72786e-09	1.25948e-07	8.26448e-09	8.13103e-08	0	2.67616e-07	7.58729e-08	3.29225e-06	5.53973e-08	7.24722e-06	0	1.05863e-06	1.52512e-06	2.73436e-09	8.87801e-09	0	0	0	0	0	0	0	6.19885e-09	0	2.32719e-08	7.45368e-10	5.65951e-09	5.42903e-08	1.04111e-08	1.6055e-08	5.67796e-08
K00218	protochlorophyllide reductase [EC:1.3.1.33]	6.85903e-07	5.95202e-07	8.96111e-07	2.29434e-07	1.66057e-07	1.61333e-07	2.82886e-07	3.76147e-07	4.1765e-07	1.19078e-06	1.15958e-06	1.00917e-06	2.06187e-06	1.613e-07	1.73528e-05	2.60378e-07	3.60264e-06	8.90811e-07	8.02241e-07	1.07456e-06	9.8211e-07	4.15173e-08	4.12731e-08	4.90383e-08	1.01943e-07	1.04862e-07	1.75273e-07	1.13857e-06	1.44036e-06	9.8932e-07	1.00528e-07	1.68295e-07	2.99598e-07	1.40993e-07	1.80814e-07	1.66173e-07
K00219	2,4-dienoyl-CoA reductase (NADPH2) [EC:1.3.1.34]	0.000413232	0.000403173	0.000404151	0.000473911	0.000472325	0.000451031	0.000350201	0.000368229	0.000352084	0.000552368	0.000615301	0.000598831	0.000341799	0.000312495	0.000429882	0.000410033	0.000410816	0.000384101	0.000331273	0.000317975	0.000331616	0.000369127	0.000364095	0.000367015	0.000315996	0.000317921	0.000312182	0.000372415	0.00034644	0.000314373	0.000329561	0.000288897	0.00031994	0.000242422	0.000333535	0.00035754
K00220	cyclohexadieny/prephenate dehydrogenase [EC:1.3.1.43 1.3.1.12]	1.23115e-05	1.29323e-05	1.31599e-05	2.34453e-05	2.18917e-05	2.01987e-05	1.45445e-05	1.46312e-05	1.52998e-05	2.44952e-05	2.48554e-05	2.38547e-05	1.8242e-05	1.51292e-05	2.06581e-05	1.55676e-05	1.69359e-05	1.42369e-05	1.10934e-05	1.4563e-05	1.25687e-05	2.43751e-05	1.51317e-05	1.88781e-05	1.07965e-05	1.21634e-05	1.16232e-05	3.94941e-05	4.78596e-05	4.98393e-05	1.71462e-05	1.43002e-05	1.62128e-05	1.42521e-05	1.59111e-05	1.35511e-05
K00221	alkylmercury lyase [EC:4.99.1.2]	8.48711e-09	1.53091e-08	1.27334e-08	5.82089e-08	5.80015e-08	6.51881e-08	1.87347e-09	1.70154e-09	1.26796e-08	0	3.44538e-09	9.45041e-10	4.89719e-08	9.92086e-08	1.33413e-06	1.47385e-09	2.17958e-07	1.60452e-07	2.34321e-08	2.19597e-08	2.63265e-08	4.50074e-08	4.2823e-08	6.37038e-08	3.55214e-10	0	0	4.88606e-09	1.49134e-08	2.37194e-08	1.26841e-07	2.56041e-07	3.1692e-07	2.60809e-08	2.53097e-08	3.64655e-08
K00224	[EC:1.3.1.-]	1.41635e-06	2.03601e-06	2.09221e-06	5.66702e-06	5.2959e-06	5.61152e-06	3.77814e-06	6.04021e-06	3.93987e-06	1.16893e-05	1.27434e-05	1.16635e-05	0	8.54329e-07	5.41125e-07	6.29569e-07	2.63885e-06	0	1.2804e-06	1.08228e-06	1.219e-06	1.69953e-05	7.70984e-06	1.11594e-05	3.49085e-06	3.86966e-06	3.96982e-06	2.76884e-05	2.91883e-05	2.99112e-05	1.07881e-06	1.02207e-06	1.084e-06	1.08203e-06	2.51924e-06	2.2966e-06
K00226	dihydroorotate dehydrogenase (fumarate) [EC:1.3.98.1]	0.000626937	0.000634225	0.000625196	0.000608713	0.000613588	0.000617991	0.000587959	0.000586905	0.000582594	0.000571597	0.000558042	0.000563897	0.00062381	0.000678052	0.000603598	0.000650629	0.000667496	0.000650801	0.000633207	0.000617501	0.000623972	0.000605819	0.000644371	0.000625656	0.00053203	0.000524026	0.000548205	0.000555298	0.000538139	0.000538929	0.000609757	0.000623429	0.000600426	0.000630843	0.000574636	0.000608763
K00228	coproporphyrinogen III oxidase [EC:1.3.3.3]	6.96917e-06	7.3781e-06	9.60862e-06	2.12088e-07	1.97727e-07	4.18819e-07	1.7819e-06	1.92953e-06	1.83949e-06	1.51903e-05	1.40334e-05	1.22358e-05	1.29729e-05	1.85923e-06	1.02587e-05	2.27924e-06	1.56581e-06	5.19128e-06	1.02881e-05	1.35722e-05	1.25983e-05	9.68571e-08	1.09055e-07	2.74185e-07	1.13096e-06	1.19272e-06	2.00158e-06	1.46023e-05	1.84685e-05	1.23011e-05	1.13526e-06	1.6987e-06	2.57979e-06	1.43355e-06	1.49856e-06	1.35215e-06
K00230	menaquinone-dependent protoporphyrinogen oxidase [EC:1.3.5.3]	0.000101497	0.00010012	9.69744e-05	9.32901e-05	9.4899e-05	9.90338e-05	0.000110416	0.000107325	0.000107322	0.000113981	0.000115434	0.000121657	0.000109221	0.000107196	9.38239e-05	0.000114919	0.000100276	0.000133122	0.000113396	0.000125624	0.000106928	0.000104906	0.000114053	0.000111391	0.000118174	0.000113981	0.000122519	0.000125427	0.000132668	0.000139495	0.000124711	0.000128336	0.00013104	0.000168024	0.000116	0.000121301
K00231	oxygen-dependent protoporphyrinogen oxidase [EC:1.3.3.4]	7.55746e-05	7.62057e-05	7.81229e-05	0.000106216	0.000104201	0.000102302	9.58272e-05	9.86682e-05	9.39329e-05	0.000109436	0.000113729	0.000115546	7.54126e-05	6.36148e-05	0.000138077	6.52379e-05	7.28477e-05	7.00594e-05	7.53449e-05	7.72148e-05	7.43989e-05	0.000128317	9.67506e-05	0.000110501	0.000118582	0.000120522	0.000114777	0.000162015	0.000169123	0.000172446	9.53276e-05	9.53915e-05	0.00010358	8.62072e-05	9.35697e-05	8.73279e-05
K00232	acyl-CoA oxidase [EC:1.3.3.6]	2.64285e-07	1.13425e-07	3.78534e-07	6.19572e-07	4.73841e-07	4.09275e-07	3.32089e-08	3.87211e-08	2.87489e-07	3.33249e-08	2.37936e-08	5.87869e-08	3.03273e-07	5.10306e-09	2.88334e-05	2.54021e-08	4.95995e-06	1.88475e-07	1.7623e-08	4.63161e-08	2.25584e-08	1.14319e-07	1.04839e-07	1.24768e-07	6.82919e-10	0	0	6.70326e-09	4.25961e-09	8.1303e-08	2.3567e-09	9.08337e-10	2.34827e-07	3.94314e-08	2.18038e-09	1.56541e-08
K00239	succinate dehydrogenase flavoprotein subunit [EC:1.3.99.1]	0.000377241	0.000376452	0.000388609	0.000363229	0.000354237	0.00036524	0.000669633	0.000603709	0.000645125	0.000455977	0.000433913	0.000451622	0.000639986	0.000411207	0.000610157	0.000389192	0.000356993	0.000407014	0.000448728	0.000528453	0.00044586	0.000472561	0.000395743	0.000435676	0.000990499	0.00101126	0.000922727	0.000674502	0.000745267	0.000775462	0.000718717	0.000747593	0.000801658	0.000750337	0.000714971	0.000601973
K00240	succinate dehydrogenase iron-sulfur subunit [EC:1.3.99.1]	3.04354e-05	3.13993e-05	3.58036e-05	3.36169e-05	3.09252e-05	3.07873e-05	7.84222e-05	7.09747e-05	7.59862e-05	5.28898e-05	5.0099e-05	4.89951e-05	7.01332e-05	2.47452e-05	9.81977e-05	1.73243e-05	2.15477e-05	1.41081e-05	3.90681e-05	4.36825e-05	4.33488e-05	5.52866e-05	3.19807e-05	4.17948e-05	0.000137162	0.000143788	0.00012092	7.95758e-05	8.51421e-05	8.03656e-05	7.59294e-05	7.75465e-05	9.03126e-05	4.22395e-05	8.02803e-05	5.71063e-05
K00241	succinate dehydrogenase cytochrome b556 subunit	8.63895e-06	9.99028e-06	1.17562e-05	1.76318e-05	1.67093e-05	1.60844e-05	6.94624e-06	1.02162e-05	7.28842e-06	2.4561e-05	2.50799e-05	2.56451e-05	4.68818e-06	3.75909e-06	3.46323e-05	2.65253e-06	9.4442e-06	4.45007e-06	7.24003e-06	7.88491e-06	7.92087e-06	2.88424e-05	1.43455e-05	2.06266e-05	5.59213e-06	6.16547e-06	6.60788e-06	4.92178e-05	5.09953e-05	4.91431e-05	4.48896e-06	7.08357e-06	8.54844e-06	3.33703e-06	5.16577e-06	5.19983e-06
K00242	succinate dehydrogenase membrane anchor subunit	3.36598e-06	3.53041e-06	4.67074e-06	1.97299e-07	1.58602e-07	2.42193e-07	8.34099e-07	9.33286e-07	9.58106e-07	7.26361e-06	6.6603e-06	5.84174e-06	5.65895e-06	8.79324e-07	1.17542e-05	1.0927e-06	2.19335e-06	2.24642e-06	4.91718e-06	6.49558e-06	6.02341e-06	6.00799e-08	6.11634e-08	1.39721e-07	5.4045e-07	5.69927e-07	9.54786e-07	6.97722e-06	8.8256e-06	5.89352e-06	5.44476e-07	8.08561e-07	1.28167e-06	6.92447e-07	7.1006e-07	6.37562e-07
K00243	hypothetical protein	0.000212378	0.000208773	0.000199377	0.000209224	0.000218714	0.000219386	0.000157685	0.000166589	0.000155508	0.00016351	0.000162134	0.000164434	0.000145993	0.000196457	0.000171418	0.000207526	0.000203753	0.000219707	0.000238843	0.000210803	0.000236236	0.000190633	0.000234628	0.000213693	0.000126665	0.000119105	0.000139541	0.000142138	0.000114376	0.000104175	0.000186886	0.00014194	0.000154197	0.000125732	0.000159131	0.000192148
K00244	fumarate reductase flavoprotein subunit [EC:1.3.99.1]	0.00118814	0.00115946	0.00110558	0.00112735	0.00116951	0.00117564	0.00113511	0.00110009	0.00111933	0.000768694	0.000745332	0.000751338	0.00107234	0.00118502	0.00115991	0.00119569	0.00116723	0.00121812	0.00134994	0.00121261	0.00134301	0.0010238	0.00126344	0.00114954	0.00121488	0.00120345	0.00120642	0.000660142	0.00050669	0.000472239	0.00126466	0.0010382	0.00113345	0.000869981	0.00118432	0.00125322
K00245	fumarate reductase iron-sulfur subunit [EC:1.3.99.1]	0.000101944	9.88319e-05	0.000108619	7.95557e-05	6.8971e-05	7.9469e-05	0.000173923	0.000160507	0.000177988	0.000142605	0.000139106	0.000151739	0.000138318	7.30852e-05	6.92953e-05	0.000105774	6.11622e-05	0.000137508	0.000116295	0.00019349	0.000111713	0.000139381	9.52672e-05	0.000124883	0.000264284	0.000264948	0.000256849	0.00027703	0.000348638	0.000393814	0.000185954	0.000212905	0.000222658	0.000366568	0.000230334	0.000179526
K00246	fumarate reductase subunit C	4.60062e-05	4.05144e-05	4.63364e-05	2.94886e-05	2.70911e-05	2.77124e-05	6.48287e-05	6.3339e-05	7.22964e-05	1.9994e-05	2.08961e-05	1.59092e-05	3.05954e-05	1.43105e-05	2.96862e-05	2.2569e-05	1.00981e-05	1.69066e-05	4.88078e-05	5.19991e-05	5.65764e-05	2.30004e-05	1.98171e-05	2.35724e-05	0.000104458	0.000109375	9.10635e-05	8.77162e-06	1.00138e-05	1.3889e-05	4.68842e-05	3.72923e-05	4.50206e-05	3.1363e-05	8.16977e-05	5.37178e-05
K00247	fumarate reductase subunit D	1.57363e-08	4.09792e-09	1.94391e-08	2.352e-08	1.37834e-08	1.46863e-08	7.38367e-09	2.01033e-09	1.58534e-08	0	1.87572e-08	5.50005e-09	1.93007e-07	3.24765e-09	1.83255e-06	0	2.57511e-07	9.13386e-08	8.12986e-09	9.54288e-09	0	9.66853e-09	1.83985e-08	2.73698e-08	0	0	4.35162e-09	8.91862e-10	0	9.71039e-10	1.91652e-08	1.6827e-08	5.19108e-08	4.34413e-10	9.92179e-09	3.32743e-08
K00248	butyryl-CoA dehydrogenase [EC:1.3.8.1]	0.00111206	0.00110792	0.00102599	0.00161365	0.00162394	0.00153696	0.00119486	0.00111167	0.00114231	0.000988583	0.000957886	0.000964657	0.00143243	0.00141878	0.00165406	0.00140363	0.0015055	0.00130018	0.00117857	0.00105647	0.00119262	0.00126083	0.00135476	0.00127824	0.00105054	0.00107208	0.00107026	0.000952626	0.000807629	0.000691052	0.00129078	0.0010215	0.00115708	0.000741151	0.00114271	0.00125621
K00249	acyl-CoA dehydrogenase [EC:1.3.8.7]	0.000785325	0.000786571	0.000744624	0.0012143	0.00121315	0.00113325	0.00088586	0.000810365	0.000847646	0.000821377	0.00080386	0.000797162	0.00115537	0.00102174	0.00150297	0.000999084	0.00112691	0.000931358	0.00082739	0.000768248	0.000855571	0.000944623	0.00095164	0.000921136	0.000794658	0.000822105	0.000801691	0.000849275	0.00076006	0.000641723	0.00093538	0.000746097	0.000858262	0.000520222	0.000836663	0.000894125
K00252	glutaryl-CoA dehydrogenase [EC:1.3.8.6]	0.000267666	0.000269047	0.00025428	0.000402888	0.000402079	0.000379757	0.000282127	0.000265968	0.000270454	0.00026582	0.000257199	0.000255807	0.000346836	0.000333201	0.000463913	0.000328855	0.000371863	0.000302293	0.000281613	0.000257726	0.000288156	0.00033675	0.00033264	0.000325711	0.000242509	0.000249015	0.000250062	0.000300877	0.000275919	0.000242441	0.000297467	0.000235404	0.000268606	0.000171372	0.00026764	0.000293588
K00253	isovaleryl-CoA dehydrogenase [EC:1.3.8.4]	0.000302842	0.000301804	0.000279214	0.000492924	0.00048772	0.00045535	0.000420299	0.000373695	0.000399254	0.000319134	0.000308744	0.000306809	0.000519724	0.000421241	0.000563385	0.00040732	0.000437263	0.000361738	0.000311258	0.000287926	0.000321269	0.000370307	0.000365691	0.000354806	0.000446319	0.000465576	0.000427117	0.000304005	0.000279265	0.00024586	0.000440988	0.00036297	0.000418254	0.000235947	0.000397917	0.000396191
K00254	dihydroorotate dehydrogenase [EC:1.3.5.2]	2.83813e-10	0	4.51206e-10	2.30684e-10	0	0	0	7.52398e-11	5.4669e-10	0	8.55058e-10	2.93169e-10	0	0	5.25274e-08	0	9.63777e-09	9.511e-11	0	7.26944e-11	0	0	0	0	0	0	0	1.47266e-10	0	3.01533e-10	0	0	4.04774e-10	1.34896e-10	3.81417e-10	1.98581e-10
K00255	long-chain-acyl-CoA dehydrogenase [EC:1.3.8.8]	1.8437e-05	1.99019e-05	1.82039e-05	7.45431e-05	7.10509e-05	6.30247e-05	2.93109e-05	2.85083e-05	2.8684e-05	5.12068e-05	5.14318e-05	5.16101e-05	4.63757e-05	3.94758e-05	8.97018e-05	3.89028e-05	5.53607e-05	2.86943e-05	9.48358e-06	9.6377e-06	1.22587e-05	5.83444e-05	3.73179e-05	4.36522e-05	8.82888e-06	1.22213e-05	1.15536e-05	7.11373e-05	7.0348e-05	6.56016e-05	2.16217e-05	1.38337e-05	1.79746e-05	6.79215e-06	2.16384e-05	2.35724e-05
K00256	isoquinoline 1-oxidoreductase [EC:1.3.99.16]	2.35722e-06	2.18396e-06	2.57942e-06	2.84717e-07	1.3988e-07	2.46167e-07	9.59509e-07	4.78364e-07	5.49293e-07	3.59713e-06	4.34192e-06	3.16844e-06	1.64945e-05	7.17855e-07	9.00466e-06	5.65729e-07	3.68918e-07	7.48046e-06	2.49251e-06	3.27718e-06	3.01536e-06	5.16398e-07	3.24789e-07	5.13768e-07	2.69557e-07	2.83702e-07	4.73015e-07	3.45398e-06	4.40218e-06	2.91978e-06	3.46859e-07	5.66076e-07	8.20559e-07	3.79684e-07	3.87981e-07	5.63336e-07
K00257	[EC:1.3.99.-]	0.00104403	0.00104563	0.000995786	0.0016377	0.00163	0.00151964	0.00119917	0.00110014	0.00114957	0.00115053	0.00113023	0.00111888	0.0015483	0.00135054	0.0020937	0.00132644	0.0015111	0.00122546	0.00109174	0.00102451	0.00113511	0.00125567	0.00124924	0.00121685	0.00109091	0.00113168	0.00109358	0.00115516	0.00105342	0.000885757	0.00125453	0.00101133	0.00116612	0.000692354	0.00112553	0.00118932
K00258	[EC:1.3.-.-]	1.30062e-07	4.08919e-08	8.29377e-08	2.68398e-08	0	4.52077e-09	7.36793e-08	1.29119e-08	1.06255e-07	0	1.70163e-07	4.90513e-08	1.92595e-06	3.24072e-08	8.50307e-06	0	1.65393e-06	9.02402e-07	6.88279e-09	4.97694e-09	0	0	0	0	0	0	0	5.97014e-09	0	1.58745e-08	3.02225e-10	1.42458e-08	4.13908e-08	7.10175e-09	1.54626e-08	4.55267e-08
K00259	alanine dehydrogenase [EC:1.4.1.1]	0.000139216	0.000134042	0.000145461	0.000148002	0.000139911	0.000136128	0.000151908	0.000158612	0.000163199	0.000154712	0.000175333	0.000163763	7.93278e-05	4.82708e-05	0.000121024	8.89888e-05	7.94188e-05	6.92451e-05	0.00010687	0.00011284	0.000114984	0.000134106	9.60302e-05	0.000117077	0.000213872	0.000221908	0.000191864	0.000144514	0.000146818	0.000155998	0.000117894	0.000105249	0.000121474	9.61137e-05	0.000174015	0.000134409
K00260	glutamate dehydrogenase [EC:1.4.1.2]	0.000419465	0.000428223	0.000426155	0.000364238	0.000374977	0.000376415	0.000363521	0.000360395	0.000350132	0.000373472	0.000362653	0.000370978	0.000423729	0.000484791	0.000364265	0.000439817	0.000472301	0.000410731	0.000380787	0.000346564	0.000366975	0.000335249	0.000390024	0.000363702	0.000292526	0.000284074	0.000302306	0.000251945	0.000213113	0.000198671	0.000368592	0.000422428	0.000373933	0.000375853	0.00031438	0.000362417
K00261	glutamate dehydrogenase (NAD(P)+) [EC:1.4.1.3]	0.000455567	0.000471108	0.000472525	0.000413402	0.000418988	0.000419272	0.000495966	0.000483712	0.000478889	0.000513822	0.000508719	0.000510202	0.000585173	0.000595787	0.000474753	0.000500313	0.000536144	0.000465601	0.000404215	0.000376482	0.000393222	0.000399687	0.000425924	0.000407764	0.000446516	0.000447088	0.000437866	0.00033308	0.000302577	0.00028662	0.00047461	0.000578439	0.000510634	0.000475607	0.000403286	0.000425502
K00262	glutamate dehydrogenase (NADP+) [EC:1.4.1.4]	0.000200814	0.00021149	0.000216089	0.000244798	0.000235186	0.000229904	0.000214493	0.000226085	0.000218618	0.000289594	0.000294797	0.000283963	0.00023397	0.000243967	0.000248047	0.000214155	0.000245281	0.000191172	0.000167303	0.000168927	0.000172407	0.000251874	0.000201294	0.000220603	0.000166959	0.000172605	0.000168762	0.000284483	0.000290428	0.000279958	0.000166641	0.00021492	0.000189058	0.000190321	0.00018024	0.000177301
K00263	leucine dehydrogenase [EC:1.4.1.9]	4.41631e-05	4.42459e-05	5.08926e-05	2.83556e-05	2.77463e-05	2.48836e-05	3.62077e-06	2.8649e-06	2.26919e-06	1.73954e-05	1.54285e-05	1.61467e-05	7.70948e-06	2.02311e-06	1.06952e-05	2.51094e-05	3.43553e-05	3.04255e-06	1.74586e-05	2.06034e-05	1.75937e-05	1.14187e-05	1.01965e-05	1.34017e-05	2.80453e-06	2.19829e-06	3.43482e-06	1.54579e-05	1.92084e-05	1.29061e-05	2.54617e-06	2.99553e-06	4.61203e-06	9.80509e-06	1.23592e-05	1.68864e-05
K00265	glutamate synthase (NADPH/NADH) large chain [EC:1.4.1.13 1.4.1.14]	0.000538979	0.000528028	0.000546041	0.00059187	0.000581888	0.000581375	0.000543157	0.000600638	0.000569988	0.000755163	0.000814011	0.00078883	0.00040213	0.000374866	0.000544866	0.000441363	0.000413016	0.000491016	0.000533323	0.00055008	0.000552681	0.000673719	0.000551759	0.000608362	0.000580349	0.000587294	0.000572169	0.000849997	0.000889916	0.000916217	0.000520904	0.000452906	0.000493939	0.000463271	0.000559383	0.00051143
K00266	glutamate synthase (NADPH/NADH) small chain [EC:1.4.1.13 1.4.1.14]	0.000984712	0.00101929	0.0010893	0.000918136	0.000892637	0.000878328	0.00120594	0.00122974	0.00121851	0.00153682	0.00159421	0.00156938	0.00133767	0.00127132	0.00102107	0.00103627	0.00108349	0.000941867	0.000711087	0.000754766	0.000722828	0.00083278	0.000716998	0.000769107	0.00107538	0.00110444	0.00101373	0.000936708	0.000976426	0.000991359	0.000960845	0.00140036	0.001143	0.00121612	0.00095351	0.000846987
K00270	phenylalanine dehydrogenase [EC:1.4.1.20]	1.03971e-06	1.03007e-06	1.1835e-06	1.59898e-06	1.53993e-06	1.34898e-06	8.57128e-08	7.69852e-09	1.39062e-08	1.1303e-07	5.30562e-08	1.9464e-07	1.10675e-07	1.86228e-09	5.3695e-07	5.43901e-07	7.06372e-07	5.57843e-08	1.92192e-07	1.64561e-07	1.54069e-07	4.48711e-07	4.08905e-07	5.159e-07	3.61972e-08	2.12516e-08	3.0193e-08	3.17962e-08	2.36005e-08	1.44452e-08	2.99374e-08	1.92198e-08	4.42301e-08	1.89632e-07	2.3901e-07	3.64861e-07
K00271	valine dehydrogenase (NAD+) [EC:1.4.1.23]	3.11996e-06	3.28399e-06	4.17554e-06	1.55345e-06	1.48668e-06	1.35547e-06	5.45443e-07	6.16813e-07	5.8949e-07	4.8848e-06	4.20165e-06	3.95341e-06	1.67753e-06	5.445e-07	3.73899e-06	1.26434e-06	1.45674e-06	5.3464e-07	3.41358e-06	4.43545e-06	4.11389e-06	4.49044e-07	4.10028e-07	5.59937e-07	3.92905e-07	3.9682e-07	6.57862e-07	4.60918e-06	5.83335e-06	3.88153e-06	3.72111e-07	5.25743e-07	8.40044e-07	6.41151e-07	6.69026e-07	7.03272e-07
K00273	D-amino-acid oxidase [EC:1.4.3.3]	5.83604e-08	5.11202e-08	7.88182e-08	2.30983e-08	0	1.1392e-09	1.85666e-08	1.00366e-08	7.60595e-08	0	3.59751e-08	9.99321e-09	4.85325e-07	8.16636e-09	6.04812e-06	0	1.28562e-06	2.35972e-07	1.08541e-07	9.91067e-08	1.12956e-07	0	0	0	0	0	0	3.15262e-10	0	1.02351e-08	0	2.03652e-09	3.03533e-08	8.62691e-08	8.16526e-10	8.49304e-09
K00274	monoamine oxidase [EC:1.4.3.4]	7.98828e-05	7.76048e-05	7.83262e-05	0.000106758	0.000106809	0.000101433	8.29444e-05	8.36457e-05	8.12964e-05	0.000100957	0.000105571	0.000106283	9.12735e-05	7.36247e-05	0.000132726	8.13698e-05	8.21384e-05	8.5864e-05	8.06759e-05	7.85916e-05	8.32001e-05	6.70071e-05	7.66758e-05	7.23886e-05	8.08762e-05	8.12564e-05	7.93242e-05	6.03793e-05	5.37282e-05	4.29485e-05	7.79702e-05	7.16996e-05	7.73547e-05	5.85612e-05	7.56487e-05	7.70962e-05
K00275	pyridoxamine 5'-phosphate oxidase [EC:1.4.3.5]	4.91274e-06	5.48945e-06	6.96698e-06	3.35686e-06	3.15053e-06	3.34448e-06	3.27131e-06	4.62969e-06	3.45631e-06	1.60018e-05	1.61753e-05	1.44316e-05	9.61179e-06	1.69805e-06	1.82479e-05	1.72492e-06	4.43398e-06	3.9451e-06	7.34513e-06	9.28776e-06	8.7484e-06	9.59546e-06	4.30021e-06	6.44732e-06	2.70974e-06	2.96722e-06	3.53965e-06	2.49027e-05	2.83038e-05	2.47733e-05	1.34763e-06	1.67531e-06	2.37602e-06	1.58591e-06	2.33854e-06	2.14937e-06
K00276	primary-amine oxidase [EC:1.4.3.21]	1.18548e-07	1.83052e-08	1.61063e-07	7.36335e-08	0	2.02371e-09	3.29824e-08	2.17727e-08	1.63768e-07	0	7.5028e-08	2.15651e-08	8.6215e-07	1.4507e-08	1.87336e-05	0	2.78896e-06	4.24175e-07	2.39341e-08	3.95712e-08	0	0	0	0	0	0	0	2.47529e-09	0	5.15694e-08	2.89358e-08	4.9538e-08	2.42133e-07	2.30705e-08	6.41098e-09	7.96501e-08
K00278	L-aspartate oxidase [EC:1.4.3.16]	0.000579071	0.000577211	0.000583058	0.000595191	0.000591561	0.000587444	0.000797816	0.000760485	0.000786978	0.000658829	0.000651878	0.000647611	0.000788866	0.000664999	0.000733975	0.000600229	0.000590786	0.000575116	0.000607747	0.000609735	0.000621543	0.000591403	0.000563187	0.000571654	0.000968541	0.000993156	0.000907684	0.000617352	0.000618989	0.000611684	0.000784692	0.000801751	0.000817316	0.000652962	0.00077246	0.000692364
K00281	glycine dehydrogenase [EC:1.4.4.2]	0.000367442	0.000364245	0.000351126	0.000347483	0.000359599	0.000359928	0.000266511	0.000273497	0.000264846	0.00028434	0.000284579	0.000276998	0.000300374	0.000346211	0.000424641	0.000363415	0.000385835	0.000378564	0.000403694	0.000364181	0.000402685	0.000312388	0.000382205	0.00034859	0.00020764	0.000197631	0.00022946	0.000248323	0.000213078	0.000185381	0.000304663	0.000239332	0.000256948	0.000213756	0.000269617	0.0003241
K00282	glycine dehydrogenase subunit 1 [EC:1.4.4.2]	0.000709873	0.000723465	0.000712405	0.000669781	0.00067861	0.000680481	0.000573727	0.000595721	0.00057774	0.000612345	0.000613298	0.000601527	0.000626827	0.000786815	0.000600138	0.000715111	0.00075834	0.000695512	0.000674881	0.000597727	0.000667334	0.000592024	0.000683123	0.000639134	0.000395262	0.000382354	0.000422864	0.000409668	0.000336692	0.000321383	0.000561527	0.000597696	0.000525596	0.000515835	0.000504264	0.00057836
K00283	glycine dehydrogenase subunit 2 [EC:1.4.4.2]	0.000642281	0.000660579	0.000660558	0.000600507	0.000602968	0.000602913	0.000528508	0.000552782	0.000535167	0.00060901	0.000614397	0.000599747	0.000594294	0.000733405	0.000531904	0.000645353	0.000693851	0.000613193	0.000571753	0.000510683	0.000566895	0.000523307	0.00058297	0.00055436	0.000344202	0.000335641	0.00036514	0.000379435	0.000324646	0.000314787	0.000487959	0.000572423	0.000476107	0.000489933	0.000441338	0.000496686
K00284	glutamate synthase (ferredoxin) [EC:1.4.7.1]	0.000213896	0.000203306	0.000192698	0.000291502	0.000295362	0.000286189	0.000174187	0.000205448	0.00017918	0.000349739	0.000395183	0.000388681	0.000158203	0.000175856	0.000285859	0.000219359	0.000202963	0.000266884	0.000200974	0.000175458	0.000198525	0.000198116	0.000228253	0.000213173	0.000108522	0.000101396	0.000119487	0.000168579	0.000140242	0.000122598	0.00015645	0.000131464	0.000143718	0.000106737	0.000137764	0.000174561
K00285	D-amino-acid dehydrogenase [EC:1.4.99.1]	7.66146e-05	7.62328e-05	8.30653e-05	0.00010271	9.83709e-05	9.01644e-05	7.28839e-05	7.28134e-05	7.52223e-05	0.000168039	0.000174837	0.000165529	0.000126439	7.36354e-05	0.000130509	8.17265e-05	7.41835e-05	9.10519e-05	7.18195e-05	8.79195e-05	8.40528e-05	4.81345e-05	4.66006e-05	4.67887e-05	4.96048e-05	5.25895e-05	5.1603e-05	9.27191e-05	0.000108597	7.95364e-05	5.40128e-05	5.60526e-05	6.10523e-05	5.00112e-05	5.69802e-05	5.47557e-05
K00286	pyrroline-5-carboxylate reductase [EC:1.5.1.2]	0.00040064	0.0004041	0.000399314	0.000422588	0.000422273	0.000418829	0.000353216	0.000358266	0.000353213	0.000365436	0.00036087	0.000362488	0.00036932	0.00041145	0.000386887	0.000407587	0.000423689	0.000396869	0.000387133	0.00037027	0.000384888	0.000395788	0.000412678	0.000403389	0.000298193	0.00029457	0.000309795	0.000337209	0.000321977	0.000319425	0.000357258	0.000351228	0.000341408	0.000345916	0.000344261	0.000368291
K00287	dihydrofolate reductase [EC:1.5.1.3]	6.51103e-05	6.47714e-05	6.28048e-05	6.44896e-05	6.7253e-05	6.75664e-05	5.07301e-05	5.23354e-05	4.88591e-05	4.80349e-05	4.55712e-05	4.62068e-05	5.44988e-05	6.14881e-05	7.455e-05	6.24275e-05	6.67966e-05	6.77339e-05	7.4838e-05	6.87154e-05	7.38398e-05	6.68667e-05	7.45192e-05	7.09643e-05	4.20421e-05	3.98148e-05	4.6905e-05	6.26684e-05	5.78154e-05	5.2965e-05	5.713e-05	4.86332e-05	5.23098e-05	4.60574e-05	5.05586e-05	6.0773e-05
K00288	methylenetetrahydrofolate dehydrogenase (NADP+) / methenyltetrahydrofolate cyclohydrolase / formyltetrahydrofolate synthetase [EC:1.5.1.5 3.5.4.9 6.3.4.3]	1.02181e-07	7.43201e-08	2.4307e-07	7.03701e-07	7.52745e-07	6.60933e-07	1.50097e-08	5.98015e-08	2.90635e-09	7.18449e-07	4.98639e-07	1.15007e-06	0	0	0	1.56778e-08	0	0	6.86408e-08	2.27059e-08	5.98436e-08	2.83038e-07	1.79074e-07	2.00304e-07	4.17423e-09	9.43326e-09	5.91275e-09	1.62211e-06	5.92064e-07	3.91811e-07	1.44651e-08	4.28309e-08	2.24954e-08	1.4043e-08	3.98888e-08	5.26945e-08
K00290	saccharopine dehydrogenase (NAD+, L-lysine forming) [EC:1.5.1.7]	8.26477e-05	7.77549e-05	8.60899e-05	8.40007e-05	7.92559e-05	7.93711e-05	0.00014447	0.000147318	0.000150703	0.000169319	0.000186809	0.000178239	9.29195e-05	4.26293e-05	9.1039e-05	5.82428e-05	3.38518e-05	6.50436e-05	8.52218e-05	0.000103168	9.34182e-05	9.88329e-05	6.05555e-05	7.97007e-05	0.000215137	0.00022323	0.000194637	0.000165037	0.000182337	0.000178759	0.000112318	0.000121243	0.000137201	0.000106676	0.000149352	0.000109988
K00292	saccharopine dehydrogenase (NAD+, L-glutamate forming) [EC:1.5.1.9]	2.25538e-09	0	3.4746e-09	1.73601e-09	0	0	0	5.9791e-10	4.34439e-09	0	0	0	0	0	5.49895e-07	0	7.65887e-08	7.55813e-10	5.76458e-10	5.19377e-10	0	0	0	0	0	0	0	0	0	1.00878e-09	0	1.19314e-09	4.06098e-09	4.51296e-10	0	1.01006e-09
K00293	saccharopine dehydrogenase (NADP+, L-glutamate forming) [EC:1.5.1.10]	7.57347e-08	2.28396e-06	8.35534e-07	8.43996e-06	6.60208e-06	6.5524e-06	0	0	5.73112e-07	2.64562e-06	4.94841e-06	1.33336e-06	0	0	1.57054e-07	0	0	0	1.08409e-06	8.7724e-07	1.05346e-06	2.98448e-06	2.6438e-06	2.5734e-06	9.81002e-08	1.66271e-07	0	5.52467e-07	1.59137e-07	3.46919e-07	0	1.51725e-09	3.93603e-09	2.82732e-09	1.30013e-08	7.8359e-08
K00294	1-pyrroline-5-carboxylate dehydrogenase [EC:1.5.1.12]	9.77985e-05	9.65799e-05	0.00010433	0.000101201	9.45066e-05	9.36714e-05	0.000230041	0.000204498	0.000226769	0.000101639	0.000103652	9.10731e-05	0.000182184	7.90307e-05	0.000175499	6.90161e-05	5.27049e-05	5.19603e-05	0.000122538	0.000133238	0.000133111	0.00010139	7.42651e-05	8.78156e-05	0.000391597	0.000407972	0.000344711	0.000119978	0.000130791	0.000129335	0.000216081	0.000216156	0.000244301	0.000140716	0.000243907	0.000175129
K00297	methylenetetrahydrofolate reductase (NADPH) [EC:1.5.1.20]	0.000333694	0.000328377	0.000321826	0.000377832	0.000380194	0.000369298	0.000324448	0.000321763	0.000327414	0.000282102	0.000286258	0.000280185	0.000309786	0.000319261	0.00036211	0.000332994	0.0003444	0.000311934	0.000338313	0.000310527	0.000345607	0.000356396	0.000356851	0.000351867	0.000325253	0.00033128	0.000320291	0.000299749	0.000273189	0.0002685	0.000334369	0.000269255	0.00029599	0.000212914	0.000338168	0.000337383
K00298	N5-(carboxyethyl)ornithine synthase [EC:1.5.1.24]	2.73547e-08	0	0	1.54388e-06	1.47051e-06	1.40906e-06	1.06334e-06	1.99425e-06	7.71556e-07	8.43154e-08	2.73353e-08	3.93638e-07	6.62281e-07	0	2.64613e-07	7.66595e-07	1.16115e-06	0	1.44926e-08	3.16692e-08	1.522e-08	3.53128e-07	3.53672e-07	3.15675e-07	1.24015e-07	1.20111e-07	2.00761e-07	2.82476e-08	2.87393e-08	3.07553e-08	1.27205e-07	3.59957e-07	1.46949e-07	1.65108e-07	6.73081e-07	4.95178e-07
K00299	FMN reductase [EC:1.5.1.38]	4.3e-05	4.24707e-05	4.05958e-05	5.17909e-05	5.14904e-05	5.069e-05	4.156e-05	3.97345e-05	4.0808e-05	4.69591e-05	4.62843e-05	4.80311e-05	5.10125e-05	4.67051e-05	6.94773e-05	5.10722e-05	5.05389e-05	5.7318e-05	4.50293e-05	4.90483e-05	4.41267e-05	4.744e-05	4.99933e-05	4.86084e-05	3.64038e-05	3.53922e-05	3.94627e-05	4.75695e-05	5.04591e-05	5.03912e-05	4.61517e-05	4.28718e-05	4.63548e-05	5.57757e-05	4.36996e-05	4.75236e-05
K00301	sarcosine oxidase [EC:1.5.3.1]	1.8561e-06	1.72516e-06	2.00332e-06	2.09099e-06	2.03073e-06	2.0659e-06	3.1381e-06	2.62649e-06	2.90598e-06	3.77488e-06	4.56655e-06	4.58499e-06	6.8493e-06	1.66795e-06	1.4172e-05	2.27072e-06	3.1131e-06	5.2427e-06	1.81799e-06	3.72529e-06	1.46241e-06	3.54264e-06	2.41936e-06	3.12801e-06	4.12744e-06	3.96596e-06	4.32717e-06	7.54596e-06	8.64114e-06	9.56645e-06	3.57095e-06	4.69554e-06	4.85914e-06	8.89556e-06	4.10336e-06	3.56393e-06
K00302	sarcosine oxidase, subunit alpha [EC:1.5.3.1]	0.000295747	0.000327003	0.000363765	0.000195199	0.000193383	0.000193731	0.000346577	0.00036273	0.000344162	0.000605622	0.000619007	0.000615851	0.000546495	0.000586661	0.000329594	0.000355597	0.000407366	0.000340121	0.000144818	0.000138555	0.000140989	0.000121509	0.00014066	0.0001303	0.000135476	0.000135843	0.000130583	0.000113309	0.00010256	9.10153e-05	0.000230654	0.000550832	0.000334271	0.000419433	0.000129166	0.000136148
K00303	sarcosine oxidase, subunit beta [EC:1.5.3.1]	0.000141208	0.000164877	0.000193122	9.79094e-05	9.13671e-05	8.90134e-05	0.000185194	0.000207295	0.00018994	0.000452017	0.000483144	0.000471893	0.000319892	0.000348909	0.000165441	0.000187353	0.000211469	0.000190156	1.57334e-05	2.02659e-05	1.48262e-05	2.50092e-05	2.48335e-05	2.40583e-05	1.22071e-05	1.2258e-05	9.60225e-06	3.29178e-05	2.80629e-05	1.98155e-05	7.51419e-05	0.000324317	0.000159124	0.000247643	1.29293e-05	1.36417e-05
K00304	sarcosine oxidase, subunit delta [EC:1.5.3.1]	8.72508e-08	4.13358e-08	2.92873e-08	2.3309e-08	1.88743e-08	1.02021e-07	7.44792e-08	1.32829e-09	2.22238e-08	0	2.66627e-07	8.20246e-08	1.94686e-06	3.27591e-08	2.13277e-06	0	1.70145e-07	8.9738e-07	2.95713e-09	2.26045e-09	0	0	0	0	0	0	0	2.23307e-08	0	2.73146e-08	1.43619e-09	6.12058e-09	1.7256e-08	1.22197e-08	5.78362e-08	6.18885e-08
K00305	sarcosine oxidase, subunit gamma [EC:1.5.3.1]	1.45899e-07	6.64916e-08	5.60348e-08	3.35916e-08	2.19221e-08	1.20539e-07	1.19805e-07	3.60783e-09	4.64383e-08	0	4.66317e-07	1.44775e-07	3.13167e-06	5.26953e-08	4.46449e-06	0	4.62142e-07	1.44536e-06	4.78467e-09	5.16881e-09	0	0	0	0	0	0	0	4.23667e-08	0	5.37075e-08	2.54334e-09	9.90318e-09	3.61332e-08	2.40271e-08	1.09729e-07	1.0848e-07
K00309	[EC:1.5.3.-]	3.01349e-06	2.74187e-06	3.08173e-06	2.35198e-06	2.04702e-06	2.15701e-06	2.36928e-06	2.89131e-06	2.91803e-06	1.03255e-06	1.04311e-06	9.29537e-07	1.55717e-06	8.30796e-07	9.49073e-06	1.34391e-06	2.3795e-06	1.68214e-06	2.44183e-06	2.57116e-06	2.84437e-06	3.61594e-06	2.9432e-06	3.19056e-06	2.56212e-06	2.69497e-06	2.31442e-06	2.55731e-07	2.67412e-07	2.51856e-07	7.92247e-07	9.78546e-07	1.26747e-06	9.04098e-07	3.17496e-06	2.19226e-06
K00311	electron-transferring-flavoprotein dehydrogenase [EC:1.5.5.1]	0.000111971	0.000106921	0.000114249	9.62661e-05	9.32304e-05	9.5611e-05	0.000112845	0.000118746	0.000121271	0.000141916	0.000152322	0.000143641	9.92224e-05	6.94716e-05	8.07895e-05	9.07855e-05	6.79529e-05	0.000109024	0.000118214	0.00013729	0.000124726	9.85553e-05	9.01853e-05	9.71292e-05	0.000127114	0.000127553	0.000125276	0.000135472	0.00015296	0.000153626	9.42874e-05	9.16233e-05	9.71502e-05	0.00012864	0.000126695	0.000108599
K00313	electron transfer flavoprotein-quinone oxidoreductase [EC:1.5.5.-]	7.71233e-05	7.79972e-05	7.18247e-05	0.000188162	0.000176365	0.000159849	0.000185169	0.000160555	0.000180098	0.000162815	0.000163461	0.000163697	0.000225586	0.00015112	0.000225757	0.000145652	0.000146082	0.000126098	6.18832e-05	8.59196e-05	6.66348e-05	0.000136765	0.000102537	0.000112736	0.000206976	0.00022044	0.000192157	0.000157809	0.000193908	0.000211472	0.00019727	0.000181921	0.000199024	0.000165405	0.000177126	0.000146458
K00314	sarcosine dehydrogenase [EC:1.5.8.3]	1.12805e-07	6.21319e-08	1.04512e-07	2.28e-07	1.88285e-07	1.82031e-07	4.30918e-07	3.80795e-07	3.85429e-07	3.28143e-08	1.11994e-06	3.88272e-07	1.79769e-06	7.36666e-08	2.98628e-06	7.5674e-09	4.98655e-07	5.7392e-07	6.67972e-09	1.14505e-08	7.564e-09	4.54873e-08	4.87693e-08	5.5339e-08	3.41031e-08	3.85345e-08	6.44089e-08	1.76381e-07	4.56854e-08	1.96676e-07	1.34614e-08	2.4996e-08	3.45607e-08	9.96063e-08	4.57368e-07	2.61477e-07
K00315	dimethylglycine dehydrogenase [EC:1.5.8.4]	6.13686e-06	5.86903e-06	5.08544e-06	1.67839e-05	1.57051e-05	1.38309e-05	8.56068e-06	7.29665e-06	8.96586e-06	6.66349e-06	7.67009e-06	6.40798e-06	1.36463e-05	1.11991e-05	1.86168e-05	1.16413e-05	1.33442e-05	8.99863e-06	3.38219e-06	3.46268e-06	4.43432e-06	7.65247e-06	6.75817e-06	6.7229e-06	3.41457e-06	4.35052e-06	3.54353e-06	1.88042e-06	1.81279e-06	1.20235e-06	5.72355e-06	3.19402e-06	4.50328e-06	2.0705e-06	8.32275e-06	7.63002e-06
K00316	spermidine dehydrogenase [EC:1.5.99.6]	9.74957e-08	4.82808e-08	2.8542e-08	4.82099e-08	4.51692e-08	4.86192e-08	1.19655e-07	6.14152e-08	3.95356e-08	2.58989e-09	1.62646e-07	5.65983e-08	2.2943e-06	3.8263e-08	1.73799e-06	2.35472e-08	5.59592e-08	1.04639e-06	6.52046e-09	5.21581e-09	4.67509e-10	1.08469e-08	1.08636e-08	9.69649e-09	3.80933e-09	3.68941e-09	6.16671e-09	1.18168e-09	8.82776e-10	1.93506e-09	1.17582e-08	2.36311e-08	3.32043e-08	5.51461e-09	2.14881e-08	6.22717e-08
K00317	trimethylamine dehydrogenase [EC:1.5.8.2]	6.67189e-08	5.94975e-08	7.23756e-08	3.40621e-07	4.40224e-07	2.90087e-07	8.75603e-08	1.22514e-07	5.1419e-08	2.17228e-08	6.09913e-08	6.89264e-08	3.41546e-07	5.06245e-09	1.89834e-06	1.50595e-07	7.1333e-08	1.38418e-07	2.40639e-08	6.16995e-09	1.21334e-08	7.84438e-08	7.37713e-08	8.13299e-08	2.98633e-08	7.37883e-09	1.23334e-08	1.14226e-08	3.8801e-09	9.7734e-09	1.2033e-08	5.2421e-08	4.75341e-08	1.51887e-08	5.89034e-08	7.64417e-08
K00318	proline dehydrogenase [EC:1.5.99.8]	2.0758e-05	1.84788e-05	2.15768e-05	2.505e-05	2.38233e-05	2.20112e-05	3.41327e-05	3.1334e-05	3.56049e-05	9.96708e-06	9.96192e-06	8.79562e-06	2.01654e-05	7.80558e-06	3.28005e-05	1.07441e-05	7.28495e-06	7.02678e-06	2.10524e-05	2.21646e-05	2.41067e-05	1.26729e-05	1.07814e-05	1.28878e-05	5.64085e-05	5.89404e-05	4.89777e-05	3.91422e-06	4.06452e-06	3.56481e-06	2.45852e-05	2.41031e-05	2.76779e-05	1.62077e-05	3.94488e-05	2.67634e-05
K00319	methylenetetrahydromethanopterin dehydrogenase [EC:1.5.99.9]	3.66115e-05	3.8439e-05	4.06426e-05	3.04302e-05	2.52184e-05	3.23105e-05	7.32969e-05	6.3943e-05	7.02004e-05	8.05955e-05	7.67705e-05	8.86171e-05	7.39366e-05	4.16964e-05	2.57355e-05	5.661e-05	3.31948e-05	8.2802e-05	4.49258e-05	9.56286e-05	3.63271e-05	8.72842e-05	5.94912e-05	7.56508e-05	0.00010776	0.000104253	0.000112266	0.00017066	0.000215354	0.000240021	9.20505e-05	0.000119469	0.000121313	0.000229474	9.93115e-05	8.52795e-05
K00320	coenzyme F420-dependent N5,N10-methenyltetrahydromethanopterin reductase [EC:1.5.99.11]	4.36828e-05	4.55928e-05	4.84787e-05	3.6074e-05	2.99301e-05	3.82966e-05	8.72474e-05	7.61123e-05	8.37362e-05	9.57653e-05	9.13869e-05	0.000105462	8.81634e-05	4.93956e-05	5.06923e-05	6.73924e-05	4.30134e-05	9.86786e-05	5.34405e-05	0.000113829	4.31822e-05	0.000101867	6.92608e-05	8.8459e-05	0.000128239	0.000124044	0.000133625	0.000203153	0.000256341	0.000285771	0.000109347	0.000142003	0.000144297	0.000273165	0.000118108	0.000101427
K00322	NAD(P) transhydrogenase [EC:1.6.1.1]	4.39879e-05	4.60482e-05	4.75647e-05	3.77165e-05	3.76492e-05	3.84873e-05	2.82573e-05	3.14574e-05	2.9245e-05	4.86223e-05	4.59261e-05	4.29968e-05	2.8647e-05	3.25577e-05	4.34342e-05	3.49744e-05	3.88973e-05	3.35595e-05	5.34331e-05	5.37479e-05	5.63628e-05	4.16198e-05	4.17034e-05	4.15255e-05	2.48372e-05	2.43174e-05	2.78418e-05	5.89618e-05	6.0704e-05	5.02586e-05	2.88118e-05	2.42975e-05	2.75354e-05	2.23571e-05	2.98774e-05	3.37538e-05
K00324	NAD(P) transhydrogenase subunit alpha [EC:1.6.1.2]	4.91053e-05	4.77569e-05	5.52489e-05	3.56839e-05	3.24659e-05	3.37306e-05	4.27234e-05	4.45234e-05	4.81522e-05	6.03868e-05	6.1935e-05	5.66121e-05	3.86134e-05	1.59337e-05	5.64598e-05	3.00264e-05	2.45713e-05	3.77463e-05	5.14409e-05	6.93336e-05	5.65894e-05	4.12787e-05	2.81599e-05	3.7332e-05	5.52633e-05	5.59235e-05	5.50473e-05	8.12658e-05	9.65143e-05	9.27677e-05	2.63938e-05	3.32609e-05	3.63866e-05	6.53455e-05	5.73984e-05	4.43168e-05
K00325	NAD(P) transhydrogenase subunit beta [EC:1.6.1.2]	7.34171e-05	6.74639e-05	7.93381e-05	4.20106e-05	3.84586e-05	4.07621e-05	6.66832e-05	7.03876e-05	7.79578e-05	7.04404e-05	7.11827e-05	6.4707e-05	4.73918e-05	2.58296e-05	5.99431e-05	4.31886e-05	2.90679e-05	5.22996e-05	7.65613e-05	9.84515e-05	8.61365e-05	4.3968e-05	3.35871e-05	4.35273e-05	8.49295e-05	8.67239e-05	8.17228e-05	7.57602e-05	9.36926e-05	8.95023e-05	3.29165e-05	4.37739e-05	4.57377e-05	8.41762e-05	8.92662e-05	6.47114e-05
K00329	NADH dehydrogenase [EC:1.6.5.3]	7.13592e-05	8.56339e-05	9.85968e-05	4.7953e-05	4.28568e-05	4.57802e-05	9.74535e-05	0.000104381	9.90606e-05	0.000174391	0.000174994	0.000173811	0.000139163	0.000151387	5.90738e-05	8.41093e-05	0.000100253	7.86347e-05	3.05867e-05	4.62325e-05	2.85338e-05	7.62003e-05	4.17569e-05	5.73389e-05	5.07522e-05	5.23358e-05	5.13793e-05	0.000136449	0.000159829	0.000172737	6.65421e-05	0.000169378	0.000104981	0.00016577	4.98071e-05	3.93891e-05
K00330	NADH-quinone oxidoreductase subunit A [EC:1.6.5.3]	3.63365e-05	3.56569e-05	3.77549e-05	5.12466e-05	4.77054e-05	4.65452e-05	9.42107e-05	8.83971e-05	9.39454e-05	5.81429e-05	6.03462e-05	5.58431e-05	7.51259e-05	3.6036e-05	7.32091e-05	3.00633e-05	2.94474e-05	2.1826e-05	4.17189e-05	4.4152e-05	4.61095e-05	7.94428e-05	4.5504e-05	5.88881e-05	0.00015071	0.000159216	0.000133562	0.000101559	0.000112045	0.000116307	8.73018e-05	8.24819e-05	9.54974e-05	4.62858e-05	9.81402e-05	7.03743e-05
K00331	NADH-quinone oxidoreductase subunit B [EC:1.6.5.3]	0.000151279	0.000160828	0.000176781	0.000152774	0.000139224	0.000142084	0.000244596	0.000241043	0.000248259	0.000271225	0.000273507	0.000270019	0.00024987	0.000202854	0.00016787	0.000159437	0.000158883	0.00015275	0.000116723	0.000160172	0.000118943	0.000225494	0.000138214	0.000178222	0.000277383	0.00028718	0.000262276	0.000324053	0.000373785	0.000394045	0.000195879	0.000291086	0.000256965	0.000315237	0.000227264	0.000178546
K00332	NADH-quinone oxidoreductase subunit C [EC:1.6.5.3]	9.60076e-05	0.000107963	0.000125843	7.2761e-05	6.71452e-05	6.71566e-05	0.000151328	0.00015412	0.000152515	0.000201426	0.00019721	0.000195522	0.000196775	0.000190336	0.000125024	0.000101507	0.000124528	8.47791e-05	4.90375e-05	5.39706e-05	5.39435e-05	9.93309e-05	5.85337e-05	7.48443e-05	0.000121328	0.000128989	0.000109086	0.000120217	0.000130354	0.000128318	9.6634e-05	0.000209893	0.000145125	0.000148379	8.80512e-05	6.42194e-05
K00333	NADH-quinone oxidoreductase subunit D [EC:1.6.5.3]	0.000260679	0.000284089	0.000318142	0.000243835	0.000222544	0.000224944	0.000405002	0.000409501	0.000412099	0.000490042	0.000490163	0.000482901	0.000453562	0.000408475	0.00029962	0.000272155	0.000306689	0.000237398	0.000166324	0.000208186	0.000174219	0.000350668	0.000209502	0.000270778	0.000397687	0.000417234	0.000369231	0.000465993	0.000525468	0.000545637	0.000293326	0.000505051	0.000400727	0.000451261	0.000319349	0.000246256
K00334	NADH-quinone oxidoreductase subunit E [EC:1.6.5.3]	0.000313284	0.00031593	0.00029707	0.000426121	0.000422886	0.000410892	0.000354104	0.000350916	0.000347746	0.000351278	0.000362685	0.00035285	0.000364659	0.000357848	0.000392441	0.000360005	0.000384716	0.000337331	0.000312232	0.000286896	0.000311265	0.000423904	0.000384759	0.000392419	0.000336235	0.000344151	0.000337172	0.000422897	0.000413378	0.000407952	0.000356454	0.000306063	0.000335681	0.000244235	0.000335226	0.000350343
K00335	NADH-quinone oxidoreductase subunit F [EC:1.6.5.3]	0.00134189	0.00135235	0.00127605	0.00167767	0.00167382	0.00164464	0.00147195	0.00145931	0.00144421	0.00145584	0.00151389	0.00147072	0.00149128	0.00148891	0.00153771	0.00149251	0.0015442	0.00144786	0.00136772	0.0012595	0.00135272	0.00163514	0.0015806	0.00157308	0.00143391	0.00145061	0.00143334	0.00156126	0.00149246	0.00146729	0.00150727	0.00133734	0.00143394	0.00110573	0.00139125	0.00146589
K00336	NADH-quinone oxidoreductase subunit G [EC:1.6.5.3]	0.00129325	0.00127858	0.00121316	0.0016349	0.00163176	0.00158232	0.00154849	0.0014861	0.00152156	0.00129362	0.00131318	0.0012936	0.00157292	0.00145863	0.0016523	0.00146608	0.00149136	0.00139039	0.00133411	0.00125087	0.00134377	0.00149843	0.00146677	0.00145357	0.00163848	0.00167757	0.00159324	0.00135013	0.00130819	0.00128919	0.00159219	0.00137599	0.00151683	0.00108735	0.00152289	0.00151174
K00337	NADH-quinone oxidoreductase subunit H [EC:1.6.5.3]	0.000151062	0.000158833	0.0001755	0.000167216	0.000155351	0.000154723	0.000282497	0.000285091	0.000286497	0.00028853	0.000296843	0.00028529	0.000258619	0.000194236	0.000210478	0.000136296	0.000153046	0.000111031	0.000121523	0.00013426	0.000131861	0.000270569	0.000151448	0.000200309	0.000354211	0.000374378	0.000320412	0.000364423	0.000400523	0.000411636	0.000221154	0.000290037	0.00027119	0.000205277	0.000250782	0.000185582
K00338	NADH-quinone oxidoreductase subunit I [EC:1.6.5.3]	0.00010136	0.000110776	0.000123317	9.05228e-05	8.48013e-05	8.6048e-05	0.000162058	0.000164284	0.000163217	0.000188568	0.000188219	0.000184636	0.000182001	0.000165049	0.000126503	0.000102686	0.000119287	8.95261e-05	7.21105e-05	7.78393e-05	7.59118e-05	0.000128423	8.08638e-05	0.000100401	0.000162912	0.000170934	0.000149349	0.000167957	0.000178494	0.00017907	0.0001171	0.000197512	0.0001569	0.000150183	0.000120406	9.45634e-05
K00339	NADH-quinone oxidoreductase subunit J [EC:1.6.5.3]	4.37609e-05	4.27604e-05	4.59124e-05	5.85191e-05	5.44159e-05	5.3334e-05	9.12303e-05	8.92428e-05	9.34316e-05	6.52341e-05	6.84845e-05	6.27938e-05	6.95883e-05	3.53953e-05	7.74783e-05	3.20122e-05	3.23714e-05	2.6283e-05	4.71869e-05	4.99025e-05	5.27744e-05	8.9543e-05	5.16373e-05	6.7193e-05	0.000139163	0.000147322	0.000124323	0.000112814	0.000124198	0.000127788	7.80983e-05	7.41161e-05	8.64229e-05	4.3382e-05	9.69848e-05	6.98037e-05
K00340	NADH-quinone oxidoreductase subunit K [EC:1.6.5.3]	2.59402e-05	2.64557e-05	2.90902e-05	3.17922e-05	2.94861e-05	3.04723e-05	5.62859e-05	5.89162e-05	5.77165e-05	5.08292e-05	5.43373e-05	5.02883e-05	3.54157e-05	1.84433e-05	3.40104e-05	1.44441e-05	1.59127e-05	1.18506e-05	2.86378e-05	2.99642e-05	3.12958e-05	6.97546e-05	3.60749e-05	4.99849e-05	8.67479e-05	9.154e-05	7.83065e-05	9.91036e-05	0.000107005	0.000109468	4.43563e-05	4.64019e-05	5.23083e-05	2.80505e-05	5.74339e-05	4.1116e-05
K00341	NADH-quinone oxidoreductase subunit L [EC:1.6.5.3]	0.00022818	0.000237547	0.000247587	0.000299425	0.000280467	0.000277839	0.000420246	0.000405329	0.000416409	0.000380433	0.000389422	0.000378421	0.00038264	0.000255152	0.000347072	0.000224162	0.000231465	0.000205126	0.000216735	0.000257412	0.000223988	0.000477865	0.000298828	0.000371233	0.000572438	0.000598582	0.000530559	0.000628123	0.00070653	0.000742077	0.000410561	0.000436283	0.000464271	0.000375858	0.000427371	0.000339651
K00342	NADH-quinone oxidoreductase subunit M [EC:1.6.5.3]	0.000302772	0.000324116	0.000361647	0.000262088	0.000245057	0.000247751	0.000533283	0.000523607	0.000533112	0.000537258	0.000535165	0.000523776	0.000572338	0.000472891	0.00040518	0.00029999	0.000336372	0.000253895	0.000225843	0.000249838	0.00023932	0.000394814	0.000244875	0.000306424	0.000609704	0.000640303	0.000551142	0.000509782	0.000561644	0.000577254	0.000427401	0.000633714	0.000540879	0.000466445	0.000430509	0.000326061
K00343	NADH-quinone oxidoreductase subunit N [EC:1.6.5.3]	0.000252095	0.000267312	0.000296043	0.000229433	0.000214097	0.000215124	0.000410636	0.000404729	0.000413918	0.000421134	0.00041654	0.000407497	0.000437732	0.000371245	0.000333379	0.000246058	0.000272176	0.000211849	0.000194158	0.000214185	0.000207582	0.000330433	0.000215134	0.000261935	0.000462294	0.000485538	0.000420262	0.000394048	0.000434083	0.000440682	0.000326884	0.000479676	0.000413615	0.000358387	0.000341668	0.000262738
K00344	NADPH2:quinone reductase [EC:1.6.5.5]	0.000170643	0.000171796	0.000189041	0.000174489	0.000168162	0.000162234	0.000203658	0.000190081	0.000202752	0.000212715	0.000203579	0.000189284	0.000250942	0.000137697	0.000394708	0.000130072	0.000152539	0.000134852	0.000193496	0.00021182	0.000214958	0.000158668	0.000132666	0.000145325	0.000267165	0.000278113	0.000250023	0.000235427	0.000263268	0.000225007	0.000194364	0.000186824	0.000214124	0.000126962	0.00020412	0.000171254
K00346	Na+-transporting NADH:ubiquinone oxidoreductase subunit A [EC:1.6.5.-]	1.81758e-05	1.81906e-05	2.27942e-05	1.07329e-05	1.01279e-05	1.02404e-05	1.0962e-05	1.38174e-05	1.34835e-05	3.07924e-05	2.99631e-05	2.71906e-05	4.91583e-06	3.9626e-06	5.68658e-06	7.04416e-06	4.89909e-06	4.80726e-06	2.25574e-05	2.71468e-05	2.69665e-05	1.55167e-05	9.32797e-06	1.2715e-05	1.23906e-05	1.31131e-05	1.27573e-05	3.77567e-05	4.12344e-05	3.26083e-05	3.40905e-06	4.6369e-06	5.45159e-06	5.02884e-06	1.3593e-05	9.51164e-06
K00347	Na+-transporting NADH:ubiquinone oxidoreductase subunit B [EC:1.6.5.-]	4.81191e-05	4.75675e-05	4.96324e-05	3.65163e-05	3.86364e-05	3.87317e-05	3.25761e-05	3.38742e-05	3.33999e-05	4.04649e-05	3.83573e-05	3.68007e-05	3.08737e-05	3.70348e-05	3.28294e-05	3.95519e-05	3.77301e-05	3.96528e-05	5.83496e-05	5.72533e-05	6.12329e-05	3.47886e-05	4.2752e-05	3.9675e-05	2.86183e-05	2.76131e-05	3.12975e-05	4.12403e-05	3.76555e-05	2.70325e-05	3.24817e-05	2.66212e-05	2.9268e-05	2.46014e-05	3.50728e-05	3.85079e-05
K00348	Na+-transporting NADH:ubiquinone oxidoreductase subunit C [EC:1.6.5.-]	3.18318e-05	3.09934e-05	3.25363e-05	2.42633e-05	2.51926e-05	2.54358e-05	2.25567e-05	2.36979e-05	2.38819e-05	2.42054e-05	2.28073e-05	2.18449e-05	1.90267e-05	2.25926e-05	2.03311e-05	2.49962e-05	2.30927e-05	2.48884e-05	3.74555e-05	3.67025e-05	3.95797e-05	2.22954e-05	2.69151e-05	2.53244e-05	2.08422e-05	2.04506e-05	2.19744e-05	2.3579e-05	2.12139e-05	1.53034e-05	1.97698e-05	1.61686e-05	1.77314e-05	1.56299e-05	2.50086e-05	2.56587e-05
K00349	Na+-transporting NADH:ubiquinone oxidoreductase subunit D [EC:1.6.5.-]	4.37576e-05	4.25977e-05	4.37824e-05	3.30609e-05	3.47313e-05	3.51218e-05	4.05467e-05	3.94576e-05	4.09086e-05	3.22552e-05	3.02241e-05	2.87924e-05	3.61069e-05	3.55603e-05	3.4931e-05	3.68145e-05	3.40568e-05	3.60525e-05	5.3127e-05	5.14384e-05	5.54534e-05	3.16675e-05	3.89615e-05	3.59738e-05	4.74369e-05	4.75082e-05	4.64187e-05	3.10571e-05	2.82011e-05	2.28616e-05	4.28633e-05	3.45157e-05	3.85736e-05	2.8399e-05	4.3871e-05	4.25962e-05
K00350	Na+-transporting NADH:ubiquinone oxidoreductase subunit E [EC:1.6.5.-]	7.56937e-05	7.4179e-05	7.41058e-05	6.03142e-05	6.34905e-05	6.40443e-05	5.01183e-05	5.14183e-05	5.03574e-05	4.40129e-05	4.09995e-05	4.13195e-05	4.59813e-05	5.9818e-05	5.06057e-05	6.68431e-05	6.76761e-05	6.40584e-05	8.21649e-05	7.54839e-05	8.27604e-05	5.76922e-05	7.16353e-05	6.58496e-05	4.41771e-05	4.21672e-05	4.76445e-05	4.40585e-05	3.45302e-05	2.6514e-05	5.3163e-05	4.22342e-05	4.57482e-05	4.0281e-05	5.60628e-05	6.43136e-05
K00351	Na+-transporting NADH:ubiquinone oxidoreductase subunit F [EC:1.6.5.-]	6.19614e-05	6.11939e-05	6.37498e-05	4.56206e-05	4.80379e-05	4.81085e-05	3.88564e-05	4.00709e-05	3.97072e-05	4.58441e-05	4.32631e-05	4.17983e-05	3.64855e-05	4.4247e-05	3.92147e-05	5.02214e-05	4.9566e-05	4.74809e-05	6.92793e-05	6.74479e-05	7.20024e-05	4.22725e-05	5.1882e-05	4.84461e-05	3.43502e-05	3.30508e-05	3.73647e-05	4.61533e-05	4.17526e-05	3.02139e-05	3.9152e-05	3.23562e-05	3.5287e-05	3.05071e-05	4.33146e-05	4.81835e-05
K00354	NADPH2 dehydrogenase [EC:1.6.99.1]	5.28079e-05	5.11307e-05	5.12204e-05	4.82352e-05	4.88468e-05	4.89847e-05	3.59559e-05	3.98936e-05	3.76717e-05	4.95782e-05	5.23644e-05	5.11258e-05	3.06081e-05	3.65347e-05	3.81437e-05	4.51343e-05	4.25247e-05	4.7099e-05	5.18614e-05	4.81492e-05	5.26574e-05	4.22495e-05	4.76114e-05	4.5599e-05	2.98862e-05	2.88372e-05	3.16456e-05	3.5209e-05	3.12329e-05	2.63514e-05	3.2522e-05	2.64453e-05	2.9503e-05	2.52334e-05	3.71577e-05	4.16875e-05
K00355	NAD(P)H dehydrogenase (quinone) [EC:1.6.5.2]	2.81607e-05	2.85072e-05	3.00587e-05	2.9763e-05	2.9065e-05	2.9307e-05	4.3727e-05	3.82787e-05	4.09925e-05	3.45691e-05	3.07685e-05	3.30677e-05	4.74419e-05	2.76545e-05	3.61342e-05	2.73528e-05	2.21513e-05	3.04746e-05	3.53248e-05	4.29516e-05	3.55445e-05	3.86494e-05	3.4453e-05	3.62242e-05	6.58741e-05	6.66581e-05	6.24148e-05	4.90574e-05	5.58827e-05	5.49977e-05	5.01621e-05	5.12715e-05	5.6208e-05	5.50959e-05	4.77409e-05	4.15721e-05
K00356	NADH dehydrogenase [EC:1.6.99.3]	0.000139931	0.000137618	0.000133972	0.000178933	0.0001774	0.000170796	0.000120074	0.000127235	0.00012	0.00018111	0.000198396	0.000197089	0.000114988	0.00012168	0.000131565	0.000150284	0.000144374	0.000145994	0.000115053	0.000111213	0.000112499	0.000124562	0.000132852	0.000128945	9.42021e-05	9.22649e-05	9.76739e-05	0.000110747	0.000104634	0.000102429	0.000117259	0.000105882	0.000110453	0.0001091	0.000110541	0.000124006
K00358	[EC:1.6.99.-]	3.56903e-05	3.47788e-05	3.70675e-05	4.66578e-05	4.40561e-05	4.22693e-05	2.79436e-05	3.17927e-05	3.12375e-05	2.65283e-05	2.59892e-05	2.55898e-05	1.54627e-05	1.65211e-05	2.10583e-05	2.48515e-05	2.66557e-05	1.73628e-05	2.73492e-05	2.67809e-05	2.99571e-05	4.75314e-05	3.58321e-05	4.10468e-05	2.64307e-05	2.80295e-05	2.54845e-05	3.98973e-05	4.3626e-05	4.87524e-05	2.22497e-05	1.25555e-05	1.49354e-05	1.45339e-05	3.41039e-05	2.81385e-05
K00359	NADH oxidase [EC:1.6.-.-]	0.00112018	0.00111999	0.00109403	0.00117553	0.00118697	0.00117519	0.00111123	0.00112022	0.0011097	0.00110707	0.00113625	0.0011208	0.0011149	0.00122455	0.00110104	0.00116438	0.00117577	0.00113559	0.00110703	0.000999352	0.00110484	0.00099736	0.00111301	0.00105159	0.00102019	0.00102017	0.0010108	0.00075816	0.000641193	0.000612309	0.00109662	0.001074	0.00104254	0.000868053	0.00101955	0.00106792
K00360	nitrate reductase (NADH) [EC:1.7.1.1]	1.32805e-07	1.19726e-07	1.56865e-07	5.22755e-07	4.92413e-07	4.28261e-07	3.66717e-08	1.85488e-09	2.02291e-08	3.48611e-08	4.24661e-08	6.72794e-08	3.67753e-07	6.18803e-09	1.5641e-06	2.39806e-08	2.376e-07	1.71538e-07	1.8485e-08	6.98289e-09	2.35983e-08	1.19589e-07	1.09672e-07	1.30519e-07	8.95643e-11	0	0	9.42741e-09	4.45597e-09	7.13721e-09	2.46535e-09	1.05283e-09	1.48508e-08	6.39291e-09	8.53608e-09	2.03794e-08
K00362	nitrite reductase (NAD(P)H) large subunit [EC:1.7.1.4]	0.000635896	0.000645328	0.000650425	0.00060724	0.00061477	0.000611501	0.000570956	0.000577982	0.000567019	0.000651925	0.000644728	0.000641779	0.000638526	0.00069409	0.000644607	0.000635688	0.000669969	0.000620632	0.000622958	0.000590578	0.000626149	0.000573448	0.000613602	0.000591653	0.00047429	0.000470323	0.000487844	0.000548505	0.000530342	0.000511237	0.000598903	0.000611196	0.000572531	0.000527483	0.000515006	0.000551653
K00363	nitrite reductase (NAD(P)H) small subunit [EC:1.7.1.4]	4.38923e-06	4.68419e-06	5.92682e-06	2.40633e-06	2.17521e-06	2.0814e-06	1.01211e-06	1.11457e-06	1.11459e-06	7.3942e-06	6.5582e-06	6.08822e-06	4.1489e-06	1.27108e-06	1.02533e-05	1.35881e-06	1.90693e-06	2.12342e-06	5.24182e-06	6.7956e-06	6.36219e-06	1.16439e-06	9.3864e-07	1.31134e-06	5.64929e-07	5.88373e-07	9.79644e-07	7.04761e-06	8.98179e-06	6.0074e-06	1.09612e-06	1.89601e-06	2.58102e-06	9.50481e-07	9.03534e-07	8.85958e-07
K00364	GMP reductase [EC:1.7.1.7]	3.47982e-06	3.62337e-06	4.27227e-06	1.29813e-05	1.27407e-05	1.09896e-05	1.19214e-06	1.02962e-06	6.62774e-07	1.77192e-06	4.73296e-07	2.06128e-06	1.83951e-06	1.01448e-06	1.0604e-05	1.28639e-06	1.15124e-06	2.08247e-06	9.28432e-07	6.22811e-07	1.04861e-06	3.4913e-06	3.23929e-06	3.8872e-06	1.43339e-07	9.39639e-08	1.38945e-07	4.44853e-07	5.15828e-07	4.03357e-07	1.45925e-06	2.8015e-06	3.42602e-06	6.05809e-07	7.40572e-07	1.15331e-06
K00365	urate oxidase [EC:1.7.3.3]	2.78301e-06	3.0674e-06	4.01407e-06	5.32221e-07	4.92865e-07	4.84414e-07	6.20903e-07	7.78011e-07	7.65764e-07	6.10618e-06	5.40977e-06	4.88547e-06	2.27969e-06	6.94741e-07	6.62131e-06	9.37716e-07	1.41937e-06	7.45763e-07	4.32869e-06	5.62083e-06	5.28559e-06	1.34516e-07	1.2445e-07	2.01844e-07	4.53761e-07	4.77092e-07	7.97441e-07	5.84681e-06	7.3913e-06	4.93881e-06	4.36787e-07	6.43897e-07	1.01505e-06	7.47761e-07	5.95288e-07	4.66739e-07
K00366	ferredoxin-nitrite reductase [EC:1.7.7.1]	0.00027161	0.000268322	0.000251202	0.000255118	0.000269802	0.000273356	0.00019915	0.000200137	0.000191708	0.000139669	0.000125622	0.000133844	0.00019929	0.000272654	0.000227747	0.000273916	0.000279895	0.000286261	0.000315584	0.000271368	0.000307212	0.000242757	0.000312779	0.000279615	0.000165593	0.000154645	0.0001836	0.000148207	0.000102714	8.88747e-05	0.000243145	0.000190636	0.000204837	0.000168575	0.000207228	0.000258414
K00367	ferredoxin-nitrate reductase [EC:1.7.7.2]	7.43292e-06	8.67e-06	1.01115e-05	7.47401e-06	7.0906e-06	7.35972e-06	1.14571e-05	1.25689e-05	1.1444e-05	2.47639e-05	2.52692e-05	2.48442e-05	1.42307e-05	1.05942e-05	9.50768e-06	8.05491e-06	9.04999e-06	9.99991e-06	8.11339e-06	1.27663e-05	8.07819e-06	1.95084e-05	1.01189e-05	1.42113e-05	1.10537e-05	1.12922e-05	1.19219e-05	4.16109e-05	4.97087e-05	5.24135e-05	1.27195e-05	1.76626e-05	1.49793e-05	2.3187e-05	1.05399e-05	8.50162e-06
K00368	nitrite reductase (NO-forming) [EC:1.7.2.1]	5.25705e-06	5.37713e-06	7.46882e-06	1.22529e-06	1.26739e-06	8.8177e-07	1.26831e-06	1.47456e-06	1.87446e-06	1.12101e-05	1.09825e-05	9.22006e-06	5.24115e-06	1.28217e-06	5.2757e-05	1.74867e-06	1.01825e-05	2.23601e-06	7.51143e-06	9.93253e-06	9.21862e-06	9.19382e-07	6.96992e-07	1.00291e-06	8.70842e-07	8.72538e-07	1.48097e-06	1.08348e-05	1.35817e-05	9.1321e-06	8.19876e-07	1.17554e-06	2.07031e-06	1.1239e-06	1.19569e-06	9.56449e-07
K00370	nitrate reductase 1, alpha subunit [EC:1.7.99.4]	0.000225802	0.000230273	0.000242544	0.000198466	0.00020156	0.000197856	0.00015714	0.000158704	0.000157091	0.000213361	0.000201473	0.000199654	0.000195061	0.000228039	0.000271112	0.000194823	0.000213176	0.000202853	0.000228565	0.000219747	0.000235241	0.000172319	0.000198434	0.000191097	0.000108624	0.000104389	0.00011887	0.000161149	0.000156457	0.000133325	0.000176494	0.000195815	0.000174681	0.000155878	0.000141166	0.00015887
K00371	nitrate reductase 1, beta subunit [EC:1.7.99.4]	2.10614e-05	2.18615e-05	2.76623e-05	2.41004e-05	2.21729e-05	1.98287e-05	6.26988e-06	6.33804e-06	7.06143e-06	3.23636e-05	3.04552e-05	2.88998e-05	1.15106e-05	5.17062e-06	5.14929e-05	6.3971e-06	9.59741e-06	8.63129e-06	2.13988e-05	2.66317e-05	2.5527e-05	1.67474e-05	1.22816e-05	1.63108e-05	4.67714e-06	4.89493e-06	5.68265e-06	3.20233e-05	3.72775e-05	2.86869e-05	1.00256e-05	1.09752e-05	1.27465e-05	5.55742e-06	7.86791e-06	6.35655e-06
K00372	nitrate reductase catalytic subunit [EC:1.7.99.4]	0.000151305	0.000154777	0.000173628	0.000142751	0.000134985	0.000132973	0.000274501	0.000254254	0.000272476	0.000248054	0.000241095	0.000241843	0.000292477	0.000190211	0.000233743	0.000151455	0.000143311	0.000143396	0.000152857	0.000193718	0.000162744	0.000173646	0.000119029	0.00014447	0.000369712	0.00038508	0.000338407	0.00029614	0.000350975	0.0003665	0.000271912	0.000319973	0.00031077	0.000288384	0.000272503	0.00020504
K00373	nitrate reductase 1, delta subunit	7.2778e-06	7.72512e-06	9.99551e-06	5.86613e-06	5.65455e-06	4.92867e-06	1.68767e-06	1.70923e-06	1.86781e-06	1.40572e-05	1.2535e-05	1.14704e-05	5.19321e-06	1.80358e-06	2.20231e-05	2.24957e-06	4.294e-06	2.65522e-06	8.75996e-06	1.1316e-05	1.06388e-05	3.17281e-06	2.42845e-06	3.24322e-06	9.69847e-07	9.81184e-07	1.65064e-06	1.21579e-05	1.52753e-05	1.00937e-05	1.55704e-06	2.58958e-06	3.4987e-06	1.49613e-06	1.5291e-06	1.57004e-06
K00374	nitrate reductase 1, gamma subunit [EC:1.7.99.4]	5.3806e-05	4.93855e-05	5.72186e-05	4.06501e-05	3.76771e-05	3.72955e-05	8.67992e-05	8.18389e-05	9.23967e-05	4.16684e-05	4.16989e-05	3.68304e-05	5.39189e-05	2.22539e-05	6.15792e-05	2.68623e-05	1.6308e-05	2.0023e-05	6.07144e-05	6.64004e-05	6.98555e-05	3.96635e-05	2.9011e-05	3.59894e-05	0.000144654	0.000151681	0.000126574	4.61237e-05	5.29341e-05	5.95286e-05	8.28702e-05	6.66255e-05	7.86377e-05	4.63852e-05	0.000104556	6.9117e-05
K00375	GntR family transcriptional regulator / MocR family aminotransferase	0.00108344	0.0010848	0.00104525	0.00104264	0.00107548	0.00108381	0.000842202	0.000861371	0.000828933	0.000810636	0.000788217	0.000797557	0.000917163	0.00110459	0.000971442	0.00108793	0.00110054	0.00114395	0.00117048	0.00105679	0.00115224	0.000903067	0.00112915	0.00102555	0.000661705	0.000626308	0.000721962	0.000639967	0.000513993	0.000458589	0.000915248	0.000838571	0.000826866	0.000793548	0.000816463	0.00096912
K00376	nitrous-oxide reductase [EC:1.7.2.4]	1.34093e-05	1.45197e-05	1.9087e-05	3.27522e-06	3.13259e-06	2.89413e-06	2.99204e-06	3.70765e-06	3.4569e-06	2.94013e-05	2.57106e-05	2.34742e-05	1.01788e-05	3.32545e-06	4.48008e-06	4.51845e-06	2.84957e-06	3.18746e-06	1.9799e-05	2.60688e-05	2.43535e-05	8.4769e-07	7.82624e-07	1.18962e-06	2.1739e-06	2.29262e-06	3.83202e-06	2.80675e-05	3.55256e-05	2.35993e-05	2.10364e-06	3.09707e-06	4.62644e-06	2.75378e-06	2.7595e-06	2.20021e-06
K00378	hydroxylamine reductase [EC:1.7.-.-]	0.000852031	0.00086038	0.000846	0.000904223	0.000900948	0.000902985	0.000838699	0.000858446	0.000841177	0.000832534	0.000840112	0.000834418	0.000783832	0.000857964	0.00073648	0.000860661	0.000880029	0.000842021	0.000846149	0.000825702	0.000838677	0.0010033	0.000944457	0.000964146	0.000806537	0.000806528	0.00081838	0.000978338	0.000966976	0.000985898	0.000834827	0.000814625	0.000818882	0.00081931	0.000846981	0.000862369
K00380	sulfite reductase (NADPH) flavoprotein alpha-component [EC:1.8.1.2]	1.67518e-05	1.70045e-05	2.1331e-05	1.96592e-05	1.8977e-05	1.65706e-05	5.79598e-06	5.01653e-06	5.23084e-06	2.45121e-05	2.36321e-05	2.15251e-05	4.1317e-05	3.68038e-06	6.51027e-05	5.35329e-06	8.64083e-06	1.85359e-05	1.81159e-05	2.26402e-05	2.18891e-05	6.58835e-06	5.62894e-06	6.91067e-06	3.26506e-06	3.57074e-06	4.29029e-06	2.55473e-05	3.35806e-05	2.67786e-05	6.00264e-06	5.52475e-06	6.84924e-06	3.78884e-06	5.19218e-06	4.31949e-06
K00381	sulfite reductase (NADPH) hemoprotein beta-component [EC:1.8.1.2]	8.03306e-05	7.99333e-05	8.01127e-05	6.54057e-05	6.84305e-05	6.97659e-05	5.5028e-05	5.49953e-05	5.35098e-05	6.11724e-05	5.62198e-05	5.57368e-05	7.66509e-05	6.9233e-05	7.67557e-05	7.1965e-05	7.0033e-05	8.25708e-05	9.5951e-05	9.30333e-05	9.77914e-05	6.05542e-05	7.65958e-05	6.97873e-05	4.76649e-05	4.51142e-05	5.3231e-05	6.48401e-05	6.16587e-05	4.91379e-05	6.30207e-05	5.24959e-05	5.74526e-05	5.2681e-05	5.81249e-05	6.85608e-05
K00382	dihydrolipoamide dehydrogenase [EC:1.8.1.4]	0.00156852	0.00154566	0.0015167	0.00158533	0.00159376	0.0015849	0.00145098	0.00145508	0.00145585	0.00149834	0.00156394	0.00154664	0.00141571	0.00144099	0.00158011	0.00157412	0.0015447	0.00158804	0.0015362	0.0014869	0.00152239	0.00138187	0.00152215	0.00146293	0.00142607	0.00141276	0.00142839	0.00117903	0.00111119	0.00110134	0.00148844	0.00136764	0.00142274	0.00136261	0.00146983	0.00152967
K00383	glutathione reductase (NADPH) [EC:1.8.1.7]	0.000342618	0.000337064	0.000335668	0.000305317	0.000306903	0.00031455	0.000294357	0.000292761	0.000300567	0.00026329	0.000249563	0.000256578	0.000281346	0.000306975	0.000324995	0.000331546	0.000316506	0.000355632	0.000370438	0.000386475	0.000369354	0.000338577	0.000361692	0.000353402	0.000292592	0.000285096	0.000305954	0.000311108	0.000324055	0.00033862	0.000328221	0.00029989	0.000312534	0.000378141	0.000339564	0.000344025
K00384	thioredoxin reductase (NADPH) [EC:1.8.1.9]	0.00153307	0.00153578	0.00154197	0.00145195	0.00145909	0.00145929	0.00150212	0.0014922	0.001498	0.00140754	0.00138818	0.00139659	0.00152469	0.0015712	0.00143528	0.00152691	0.00154531	0.00147363	0.00148788	0.00145355	0.0014844	0.00135746	0.00143664	0.00140437	0.00147966	0.00147854	0.00146678	0.0012286	0.00119456	0.00120775	0.00150928	0.00154481	0.00149083	0.00147848	0.00147575	0.00147842
K00385	anaerobic sulfite reductase subunit C [EC:1.8.1.-]	0.000203185	0.000198125	0.000190549	0.000183573	0.000191667	0.000191477	0.000136978	0.000144693	0.000136525	0.000137572	0.000144836	0.00014466	0.000123281	0.000167468	0.000144457	0.00019609	0.000197933	0.000191459	0.000202422	0.00017683	0.000196752	0.000155156	0.000198467	0.000179547	0.000109746	0.000103274	0.000118638	9.97247e-05	7.71082e-05	7.4885e-05	0.00015809	0.000121647	0.000128996	0.000113022	0.000146051	0.000175322
K00386	[EC:1.8.2.-]	0.000125026	0.000122006	0.000114503	0.000121983	0.000127888	0.000128744	9.29842e-05	9.97017e-05	9.15698e-05	0.000100643	0.000105159	0.000106584	8.50829e-05	0.000115717	0.00010085	0.000127982	0.000126671	0.000133337	0.00013463	0.000115986	0.000130554	0.000108199	0.000136812	0.000122894	7.17455e-05	6.68921e-05	7.92339e-05	7.46417e-05	5.56152e-05	5.03106e-05	0.000104948	8.13169e-05	8.71721e-05	7.31303e-05	9.15056e-05	0.000114222
K00387	sulfite oxidase [EC:1.8.3.1]	2.21732e-08	4.39395e-09	1.80633e-08	6.16306e-09	0	4.85769e-10	7.91704e-09	3.56064e-09	2.72079e-08	0	3.43016e-08	1.07624e-08	2.06949e-07	3.48225e-09	1.87103e-06	0	4.56097e-07	9.97128e-08	4.76944e-10	5.87913e-10	0	0	0	0	0	0	0	3.40012e-09	0	4.84387e-09	0	9.87165e-10	4.24079e-09	2.167e-09	8.80628e-09	8.12573e-09
K00389	putative membrane protein	1.13917e-05	1.00804e-05	1.16198e-05	7.54325e-06	6.92976e-06	7.20723e-06	2.80496e-05	2.52333e-05	2.84527e-05	8.9102e-06	8.34072e-06	7.42836e-06	1.99807e-05	7.06543e-06	2.36227e-05	6.97125e-06	5.00931e-06	4.07334e-06	1.44865e-05	1.57115e-05	1.63117e-05	7.76476e-06	5.38834e-06	6.7077e-06	4.95148e-05	5.17959e-05	4.30432e-05	8.64864e-06	9.47432e-06	9.19368e-06	2.37534e-05	2.30299e-05	2.68301e-05	1.42088e-05	3.11002e-05	2.11391e-05
K00390	phosphoadenosine phosphosulfate reductase [EC:1.8.4.8]	0.000266705	0.000295857	0.000338996	0.000144083	0.000128409	0.000150231	0.000394268	0.000377016	0.000386114	0.000554287	0.000527548	0.000558967	0.000538051	0.000498817	0.000246876	0.000339739	0.000321195	0.000380998	0.000181191	0.000314961	0.000163113	0.00029941	0.00021754	0.000260343	0.000335982	0.000329025	0.000344562	0.000486137	0.000601174	0.00065214	0.000346072	0.000673479	0.000510144	0.000861134	0.000310202	0.000264591
K00392	sulfite reductase (ferredoxin) [EC:1.8.7.1]	0.000115899	0.000114107	0.000107164	0.000105811	0.000111954	0.000113988	8.65025e-05	8.65091e-05	8.35409e-05	6.03518e-05	5.3856e-05	5.74977e-05	8.85269e-05	0.000116311	0.000130434	0.000117783	0.0001257	0.000124472	0.000134526	0.000117851	0.000130644	0.000101388	0.000131692	0.000117518	7.34089e-05	6.85843e-05	8.11539e-05	6.49148e-05	4.70718e-05	4.2205e-05	0.000105603	8.43015e-05	9.03626e-05	7.93288e-05	9.08519e-05	0.00011189
K00394	adenylylsulfate reductase, subunit A [EC:1.8.99.2]	0.000207876	0.000193475	0.000205936	0.000173668	0.000170511	0.000173303	0.000263135	0.000259678	0.000279694	0.000127272	0.000123199	0.000116814	0.000161245	0.000123168	0.000150714	0.000145224	0.000112671	0.000130596	0.000231251	0.000231452	0.000249903	0.000167734	0.000158813	0.000167643	0.000381363	0.000393871	0.000346035	0.000139414	0.000131213	0.000142494	0.000228452	0.000184602	0.000212653	0.000161773	0.000311555	0.000240996
K00395	adenylylsulfate reductase, subunit B [EC:1.8.99.2]	3.44107e-05	3.0662e-05	3.50333e-05	2.31845e-05	2.14497e-05	2.22082e-05	6.55224e-05	6.11939e-05	6.91135e-05	2.17121e-05	2.08185e-05	1.85833e-05	3.9334e-05	1.56436e-05	3.18502e-05	1.86643e-05	9.02075e-06	1.21e-05	3.97671e-05	4.25518e-05	4.56212e-05	2.26017e-05	1.72568e-05	2.04797e-05	0.000111795	0.000116994	9.73127e-05	2.21077e-05	2.37556e-05	3.11518e-05	6.29624e-05	4.8802e-05	5.77365e-05	3.49095e-05	7.80018e-05	5.13574e-05
K00397	anaerobic dimethyl sulfoxide reductase [EC:1.8.99.-]	6.06031e-07	6.56698e-07	6.93864e-07	6.51645e-07	3.61295e-07	4.37409e-07	1.06378e-07	9.51694e-08	1.16843e-07	6.44851e-08	5.74336e-07	2.52519e-07	1.51274e-08	2.12684e-07	2.81243e-07	1.19431e-07	0	3.00111e-07	2.18017e-07	2.60059e-07	2.01733e-07	1.07659e-06	6.90506e-07	1.02044e-06	1.33298e-08	1.17489e-08	1.50009e-08	1.33085e-07	1.6108e-07	1.64368e-07	2.78277e-07	5.49358e-07	6.65807e-07	1.96778e-07	3.02675e-07	2.45425e-07
K00399	methyl-coenzyme M reductase alpha subunit [EC:2.8.4.1]	0.00010217	0.000107135	0.000113499	8.48642e-05	7.02691e-05	8.99119e-05	0.000204606	0.000178691	0.0001962	0.000224411	0.00021451	0.00024769	0.000206301	0.000114906	7.18475e-05	0.000157978	9.3456e-05	0.000231038	0.000125351	0.000267008	0.000101364	0.000232153	0.000157326	0.00020254	0.000300993	0.000291333	0.000313229	0.000476417	0.000601041	0.000670056	0.00025557	0.000332264	0.000337169	0.000640488	0.000277232	0.000237838
K00400	methyl coenzyme M reductase system, component A2	0.000295208	0.000301998	0.000298026	0.000268199	0.000260912	0.000281809	0.000362703	0.000339523	0.000349899	0.000337731	0.000318772	0.000351861	0.000372972	0.000329949	0.000250178	0.000349365	0.000304521	0.000414762	0.000336016	0.00043448	0.000310609	0.000432649	0.000393902	0.000416714	0.000429308	0.000416622	0.000446146	0.000553917	0.000637416	0.000691278	0.00043292	0.000480649	0.000486361	0.000720866	0.000421773	0.000411022
K00401	methyl-coenzyme M reductase beta subunit [EC:2.8.4.1]	7.08761e-05	7.44593e-05	7.88532e-05	5.91217e-05	4.87962e-05	6.24431e-05	0.000141891	0.00012407	0.000136224	0.000155489	0.000148798	0.000171887	0.000143054	7.92912e-05	4.98473e-05	0.00010956	6.53734e-05	0.000160207	8.69752e-05	0.000185294	7.03758e-05	0.000158066	0.000106867	0.000138326	0.000208919	0.000202304	0.000217227	0.000330428	0.000416857	0.000464755	0.000176901	0.000230158	0.000233518	0.000444288	0.000192461	0.000165006
K00402	methyl-coenzyme M reductase gamma subunit [EC:2.8.4.1]	4.68843e-05	4.89179e-05	5.20037e-05	3.85313e-05	3.20891e-05	4.09499e-05	9.39458e-05	8.20264e-05	9.00727e-05	0.00010276	9.85485e-05	0.000113771	9.47154e-05	5.20193e-05	3.2982e-05	7.25272e-05	4.28188e-05	0.000106072	5.74853e-05	0.000122543	4.64415e-05	0.000100799	6.77553e-05	8.84654e-05	0.000138164	0.000133717	0.000143761	0.00021876	0.000275922	0.000307663	0.000116642	0.000151915	0.000154008	0.000294001	0.000127112	0.000109026
K00404	cytochrome c oxidase cbb3-type subunit I [EC:1.9.3.1]	2.84011e-05	3.0949e-05	4.01375e-05	3.46292e-06	4.09064e-06	3.57397e-06	6.83288e-06	8.05387e-06	7.69547e-06	6.26998e-05	5.85911e-05	5.06948e-05	2.6192e-05	9.06809e-06	1.56654e-05	9.52143e-06	6.05873e-06	1.25749e-05	4.278e-05	5.6125e-05	5.24303e-05	4.03611e-06	3.26429e-06	4.89301e-06	4.77706e-06	4.96185e-06	8.3281e-06	6.06528e-05	7.66141e-05	5.10833e-05	7.04516e-06	1.15948e-05	1.58687e-05	6.6377e-06	6.82317e-06	5.77833e-06
K00405	cytochrome c oxidase cbb3-type subunit II	1.09529e-05	1.1757e-05	1.48993e-05	2.86563e-06	3.2483e-06	2.7926e-06	3.37395e-06	3.70262e-06	3.78092e-06	2.15272e-05	2.15554e-05	1.78084e-05	1.0329e-05	3.93731e-06	7.5279e-06	3.68885e-06	2.21424e-06	6.68558e-06	1.558e-05	2.00338e-05	1.8985e-05	3.21323e-06	2.59528e-06	3.61091e-06	2.72003e-06	2.81332e-06	3.79039e-06	2.07519e-05	2.60782e-05	1.74843e-05	3.45862e-06	5.87191e-06	7.76032e-06	2.83581e-06	3.89917e-06	3.20674e-06
K00406	cytochrome c oxidase cbb3-type subunit III	1.48283e-05	1.62975e-05	2.0923e-05	3.01977e-06	2.75357e-06	3.07596e-06	4.61692e-06	6.06812e-06	5.11815e-06	3.58286e-05	3.2554e-05	2.93169e-05	1.63554e-05	4.78109e-06	1.03725e-05	5.00923e-06	4.0049e-06	6.77776e-06	2.21019e-05	2.88404e-05	2.6952e-05	8.02378e-06	4.41355e-06	6.19874e-06	3.5264e-06	3.78877e-06	5.50325e-06	3.9539e-05	4.82807e-05	3.55814e-05	3.60992e-06	5.5143e-06	7.56133e-06	3.64368e-06	4.06756e-06	3.51827e-06
K00407	cytochrome c oxidase cbb3-type subunit IV	1.63476e-06	1.74505e-06	2.2774e-06	3.3442e-08	3.35745e-08	5.34719e-08	4.02054e-07	4.59465e-07	4.33266e-07	3.61838e-06	3.24105e-06	2.88255e-06	2.50468e-06	4.33022e-07	1.45467e-06	5.42923e-07	3.53129e-07	9.67006e-07	2.44352e-06	3.22823e-06	3.00096e-06	1.88409e-08	1.79265e-08	5.33352e-08	2.69397e-07	2.84109e-07	4.74877e-07	3.46788e-06	4.39925e-06	2.91836e-06	2.61419e-07	3.89837e-07	5.82111e-07	3.36201e-07	3.26621e-07	2.80652e-07
K00410	ubiquinol-cytochrome c reductase cytochrome b/c1 subunit	1.38035e-08	6.93794e-09	3.45453e-09	0	0	7.67019e-10	1.25008e-08	0	2.11022e-09	0	3.18453e-07	1.0761e-07	3.26768e-07	5.49839e-09	1.98641e-07	0	0	1.50337e-07	8.1198e-10	7.75317e-11	0	0	0	0	0	0	0	5.08874e-08	0	5.54051e-08	1.55709e-10	1.68061e-09	1.93444e-09	2.47865e-08	1.31798e-07	7.44379e-08
K00411	ubiquinol-cytochrome c reductase iron-sulfur subunit [EC:1.10.2.2]	8.37769e-06	7.97455e-06	9.57139e-06	3.65838e-06	3.03598e-06	3.36677e-06	4.69312e-06	5.35351e-06	5.86032e-06	8.3942e-06	8.06936e-06	6.78532e-06	6.44564e-06	1.84563e-06	4.81639e-06	3.12295e-06	1.56264e-06	4.67859e-06	9.17891e-06	1.09012e-05	1.09761e-05	3.31899e-06	2.63932e-06	3.47965e-06	5.46905e-06	5.76705e-06	5.2928e-06	6.84206e-06	8.61794e-06	5.7969e-06	1.4447e-06	2.03639e-06	2.81883e-06	2.20321e-06	6.36717e-06	4.38909e-06
K00412	ubiquinol-cytochrome c reductase cytochrome b subunit	1.82755e-05	1.96431e-05	2.32657e-05	1.70726e-05	1.52871e-05	1.56965e-05	2.05609e-05	2.19557e-05	2.0556e-05	3.85714e-05	3.89886e-05	3.57866e-05	2.68401e-05	9.19224e-06	2.08419e-05	7.20651e-06	6.97465e-06	1.15979e-05	2.18304e-05	2.61988e-05	2.52527e-05	3.10896e-05	1.61656e-05	2.33019e-05	2.91285e-05	3.0776e-05	2.78069e-05	6.01734e-05	6.73869e-05	5.99584e-05	1.76651e-05	2.11139e-05	2.52759e-05	1.11137e-05	1.99366e-05	1.53483e-05
K00413	ubiquinol-cytochrome c reductase cytochrome c1 subunit	6.63998e-06	7.06462e-06	9.20429e-06	1.90493e-07	1.75322e-07	3.09367e-07	1.65684e-06	1.85581e-06	1.75953e-06	1.461e-05	1.34004e-05	1.17424e-05	1.09877e-05	1.76314e-06	6.90453e-06	2.19217e-06	1.50464e-06	4.30762e-06	9.87353e-06	1.3031e-05	1.21171e-05	9.54114e-08	1.09179e-07	2.70092e-07	1.08775e-06	1.14716e-06	1.92613e-06	1.40458e-05	1.7763e-05	1.18323e-05	1.04654e-06	1.58909e-06	2.35265e-06	1.37931e-06	1.44662e-06	1.20879e-06
K00423	L-ascorbate oxidase [EC:1.10.3.3]	1.89442e-05	1.8516e-05	2.18315e-05	1.54143e-05	1.41707e-05	1.48299e-05	1.65854e-05	2.13449e-05	1.97821e-05	3.12463e-05	3.20823e-05	2.85153e-05	1.38963e-05	4.40741e-06	1.00595e-05	7.84946e-06	7.29148e-06	9.88473e-06	2.1837e-05	2.47e-05	2.56257e-05	2.80396e-05	1.48617e-05	2.08381e-05	1.88222e-05	2.01016e-05	1.86464e-05	4.88175e-05	5.40451e-05	4.97959e-05	3.56912e-06	3.48086e-06	4.88596e-06	6.32143e-06	1.90661e-05	1.35632e-05
K00425	cytochrome d ubiquinol oxidase subunit I [EC:1.10.3.-]	0.00014194	0.00013699	0.000158932	0.000127908	0.000121511	0.000118517	0.000295971	0.000272461	0.000297363	0.000182347	0.000180249	0.000166491	0.000236286	9.20031e-05	0.000251558	7.93746e-05	6.30089e-05	6.01938e-05	0.000170478	0.000189166	0.000193024	0.000160392	9.78424e-05	0.000127277	0.000499865	0.000524177	0.000439896	0.00024987	0.000281167	0.000284492	0.000286209	0.000269228	0.000306684	0.000162653	0.000319791	0.000218786
K00426	cytochrome d ubiquinol oxidase subunit II [EC:1.10.3.-]	0.000112679	0.000108677	0.000125867	0.000105022	9.94207e-05	9.68622e-05	0.000227791	0.000210874	0.000229621	0.000138623	0.000136767	0.000127254	0.000180895	7.2202e-05	0.000185529	6.2983e-05	4.87289e-05	4.83882e-05	0.000131766	0.000145479	0.000149306	0.000125479	7.78942e-05	0.000100578	0.000380251	0.000398783	0.000334585	0.000186347	0.000209063	0.00021331	0.000217945	0.000204976	0.000232287	0.000125693	0.000246273	0.00016823
K00427	L-lactate permease	8.79636e-06	8.8548e-06	9.99928e-06	1.93693e-05	1.83788e-05	1.67096e-05	6.7662e-06	7.91626e-06	7.46401e-06	8.29268e-06	8.62988e-06	9.08522e-06	6.53498e-06	1.47994e-06	1.14133e-05	3.11368e-06	2.47163e-06	4.70588e-06	6.11154e-06	6.02763e-06	6.975e-06	1.45795e-05	8.87623e-06	1.18582e-05	6.99629e-06	7.68041e-06	6.61479e-06	1.76472e-05	2.07922e-05	2.33836e-05	4.96879e-06	3.08885e-06	3.49328e-06	2.63813e-06	8.10353e-06	5.64197e-06
K00428	cytochrome c peroxidase [EC:1.11.1.5]	3.21438e-05	3.37728e-05	3.79353e-05	3.17963e-05	2.85692e-05	3.01151e-05	2.68201e-05	3.58389e-05	3.11726e-05	5.51236e-05	5.86982e-05	5.3209e-05	1.44565e-05	1.05618e-05	1.6798e-05	1.18099e-05	1.25016e-05	1.59759e-05	3.16789e-05	3.53171e-05	3.67165e-05	6.8232e-05	3.71302e-05	5.07905e-05	2.84112e-05	3.04517e-05	2.89219e-05	0.000104169	0.000116195	0.000122498	3.11557e-05	1.86227e-05	2.37774e-05	1.58223e-05	3.14887e-05	2.23169e-05
K00432	glutathione peroxidase [EC:1.11.1.9]	1.32256e-05	1.42683e-05	1.79722e-05	1.55906e-05	1.50555e-05	1.41188e-05	7.95088e-06	1.15855e-05	7.80628e-06	3.47594e-05	3.20752e-05	3.08904e-05	1.63172e-05	3.95956e-06	2.89497e-05	5.48944e-06	9.39755e-06	6.69516e-06	1.64875e-05	2.0868e-05	1.98594e-05	1.88101e-05	9.67347e-06	1.3652e-05	5.25872e-06	5.6993e-06	6.99528e-06	4.74179e-05	5.46306e-05	4.62109e-05	3.65321e-06	5.77266e-06	6.92835e-06	3.64631e-06	5.6081e-06	5.20224e-06
K00433	chloride peroxidase [EC:1.11.1.10]	0.000232487	0.000228683	0.000220901	0.000213653	0.000222378	0.000226679	0.000184276	0.00018641	0.000181076	0.000160073	0.000151554	0.000157686	0.00018183	0.000216955	0.000195085	0.000228697	0.000222573	0.000248619	0.000267422	0.000253613	0.000262878	0.000214538	0.000254311	0.000237291	0.000169559	0.00016121	0.000183814	0.000188848	0.000171855	0.000163008	0.000209477	0.000179979	0.000192513	0.000197956	0.000199476	0.000227897
K00435	peroxiredoxin [EC:1.11.1.-]	5.03453e-06	4.94096e-06	5.46197e-06	5.68163e-06	5.08768e-06	5.64398e-06	8.61702e-06	7.30205e-06	8.21904e-06	9.1896e-06	9.24612e-06	1.04469e-05	1.30954e-05	4.94545e-06	2.32447e-05	6.54076e-06	7.59024e-06	1.2094e-05	5.249e-06	1.09014e-05	4.28483e-06	8.69211e-06	5.94692e-06	7.89171e-06	1.21212e-05	1.17075e-05	1.26593e-05	1.94022e-05	2.44227e-05	2.72839e-05	1.06898e-05	1.43077e-05	1.47473e-05	2.60173e-05	1.13198e-05	9.87983e-06
K00436	hydrogen dehydrogenase [EC:1.12.1.2]	7.90802e-05	8.34586e-05	7.94344e-05	0.00012265	0.000113585	0.000111433	0.000160342	0.000143931	0.000154619	0.000128829	0.000138027	0.000130406	0.000157572	9.45994e-05	0.000134351	9.7332e-05	9.17474e-05	8.9071e-05	7.89062e-05	9.57245e-05	7.818e-05	0.000133213	9.6742e-05	0.000111449	0.000227248	0.000235587	0.000209586	0.000177493	0.000198795	0.00021465	0.000180031	0.000167313	0.000188077	0.000154589	0.000164985	0.00013766
K00437	cytochrome-c3 hydrogenase [EC:1.12.2.1]	0.000114984	0.000131379	0.000149242	4.95899e-05	5.03517e-05	5.29824e-05	0.000126038	0.000131266	0.000122631	0.000216989	0.000208742	0.00021366	0.000220804	0.000258104	0.000111856	0.000142874	0.000175591	0.000126224	4.86416e-05	4.58841e-05	4.55611e-05	3.63595e-05	4.54834e-05	4.08576e-05	2.46789e-05	2.34536e-05	2.66127e-05	2.97022e-05	2.32891e-05	1.63682e-05	7.69042e-05	0.000231953	0.000127517	0.000180078	3.14646e-05	3.96571e-05
K00438	F420-nonreducing hydrogenase [EC:1.12.2.-]	8.89389e-08	1.16227e-06	3.92089e-07	2.01256e-06	8.22307e-07	1.60933e-06	1.11525e-07	0	0	1.82758e-06	0	0	0	4.17402e-06	0	0	0	0	2.8272e-07	1.02967e-07	3.95882e-07	3.23786e-05	2.51308e-05	2.52964e-05	0	0	2.1758e-07	0	1.86882e-07	0	3.89147e-06	3.51103e-06	4.37823e-06	1.62673e-07	6.48736e-07	7.43069e-07
K00440	coenzyme F420 hydrogenase alpha subunit [EC:1.12.98.1]	8.40009e-05	8.99311e-05	0.000100734	5.20886e-05	4.51624e-05	5.67624e-05	0.000161304	0.00014463	0.000154343	0.000191668	0.000184088	0.000204084	0.000187705	0.000133458	7.2625e-05	0.000124485	9.1563e-05	0.000162256	7.9451e-05	0.000164581	6.48723e-05	0.000128746	8.47164e-05	0.000111802	0.000200172	0.000195173	0.000205162	0.000293311	0.000367694	0.000407456	0.000173978	0.000266402	0.000239668	0.000430575	0.000175315	0.000148754
K00441	coenzyme F420 hydrogenase beta subunit [EC:1.12.98.1]	0.000126908	0.000136198	0.000143974	0.000115239	0.000101167	0.000116049	0.000204714	0.000189506	0.000200521	0.000261202	0.000255144	0.000280251	0.000221261	0.00017046	0.000100878	0.000174708	0.000132984	0.000228675	0.000130305	0.000236146	0.00011391	0.000261552	0.000194988	0.000229012	0.000250601	0.000243694	0.000260053	0.000399116	0.000487153	0.000539486	0.000243037	0.000322321	0.00030654	0.000539654	0.000241432	0.000211248
K00442	coenzyme F420 hydrogenase delta subunit	3.77885e-05	3.73095e-05	4.06028e-05	2.74547e-05	2.43751e-05	2.92913e-05	0.00010995	9.30857e-05	0.000104432	7.29997e-05	7.05684e-05	7.77502e-05	0.000102217	4.4645e-05	5.41038e-05	5.14035e-05	2.89648e-05	6.52271e-05	5.24741e-05	9.16215e-05	4.76326e-05	6.54008e-05	4.28866e-05	5.62198e-05	0.000185116	0.000187144	0.000174127	0.000143233	0.00017677	0.000194914	0.000124058	0.00014294	0.000152383	0.000199141	0.000130591	0.000102126
K00443	coenzyme F420 hydrogenase gamma subunit [EC:1.12.98.1]	5.53923e-05	5.94976e-05	6.64425e-05	3.40408e-05	2.90102e-05	3.67389e-05	0.000108314	9.66517e-05	0.000103848	0.000123714	0.000118459	0.000131692	0.000125679	8.81003e-05	4.96269e-05	8.17182e-05	6.05366e-05	0.000105929	5.30565e-05	0.00010872	4.38086e-05	8.2367e-05	5.49989e-05	7.22774e-05	0.000137401	0.00013456	0.000139274	0.000186706	0.000234968	0.00026069	0.000117183	0.000177472	0.000160595	0.000282444	0.000118238	9.9457e-05
K00446	catechol 2,3-dioxygenase [EC:1.13.11.2]	1.96527e-06	2.00305e-06	2.65898e-06	1.15224e-06	1.06697e-06	9.76766e-07	4.99941e-07	4.71271e-07	5.41609e-07	3.68477e-06	3.53317e-06	3.08634e-06	3.85074e-06	4.5503e-07	1.13093e-05	5.96033e-07	1.9613e-06	1.60247e-06	2.47755e-06	3.24679e-06	3.045e-06	2.66919e-07	2.45432e-07	3.24034e-07	2.70165e-07	2.83643e-07	4.74098e-07	3.51069e-06	4.40128e-06	2.97755e-06	2.66667e-07	3.9073e-07	6.63001e-07	3.70909e-07	4.18744e-07	3.69066e-07
K00448	protocatechuate 3,4-dioxygenase, alpha subunit [EC:1.13.11.3]	2.76041e-06	2.89657e-06	3.80892e-06	1.02976e-07	8.05299e-08	2.20212e-07	6.97222e-07	7.64783e-07	7.72059e-07	5.96665e-06	5.53521e-06	4.81437e-06	5.02523e-06	7.29106e-07	7.59657e-06	8.9527e-07	1.49605e-06	2.01539e-06	4.03048e-06	5.3312e-06	4.94853e-06	3.10684e-08	2.95605e-08	8.79489e-08	4.44231e-07	4.68491e-07	7.83065e-07	5.74049e-06	7.25428e-06	4.85072e-06	4.32054e-07	6.45229e-07	1.0054e-06	5.71564e-07	5.956e-07	5.06979e-07
K00449	protocatechuate 3,4-dioxygenase, beta subunit [EC:1.13.11.3]	2.28705e-06	2.36008e-06	3.07945e-06	1.55321e-07	1.28433e-07	2.70166e-07	6.2112e-07	6.13369e-07	6.50949e-07	4.77209e-06	4.63404e-06	3.9071e-06	5.70664e-06	7.03285e-07	9.61901e-06	7.14133e-07	1.61879e-06	2.5216e-06	3.24328e-06	4.27729e-06	3.97908e-06	7.81416e-08	7.4349e-08	1.37219e-07	3.56631e-07	3.78853e-07	6.27858e-07	4.61893e-06	5.8247e-06	3.93449e-06	4.68117e-07	7.61925e-07	1.12176e-06	4.96192e-07	5.44279e-07	4.90444e-07
K00450	gentisate 1,2-dioxygenase [EC:1.13.11.4]	8.49715e-07	7.54249e-07	9.4881e-07	3.14976e-06	2.98054e-06	2.59382e-06	2.75952e-07	7.6735e-09	1.05732e-07	2.10871e-07	3.12302e-07	4.19144e-07	3.63941e-06	6.12388e-08	8.45186e-06	1.4663e-07	9.8293e-07	1.6841e-06	1.21643e-07	4.65996e-08	1.42744e-07	7.23381e-07	6.63395e-07	7.89497e-07	9.21065e-10	0	0	4.94274e-08	2.69537e-08	2.65488e-08	3.23054e-08	2.67119e-08	1.17971e-07	3.12332e-08	3.19551e-08	1.62633e-07
K00451	homogentisate 1,2-dioxygenase [EC:1.13.11.5]	9.37324e-06	9.87995e-06	1.2902e-05	6.50893e-06	6.1751e-06	5.53738e-06	2.24874e-06	2.25576e-06	2.25738e-06	1.80915e-05	1.59401e-05	1.47718e-05	1.2557e-05	2.12017e-06	1.60372e-05	2.95317e-06	3.25053e-06	4.88712e-06	1.21532e-05	1.58325e-05	1.49403e-05	1.56126e-06	1.46034e-06	1.90879e-06	1.31967e-06	1.38747e-06	2.3307e-06	1.70304e-05	2.15379e-05	1.42952e-05	1.295e-06	1.91005e-06	2.93088e-06	1.69977e-06	1.66884e-06	1.52241e-06
K00452	3-hydroxyanthranilate 3,4-dioxygenase [EC:1.13.11.6]	1.6286e-07	1.29863e-07	1.43187e-07	5.31986e-07	5.06973e-07	4.48158e-07	1.3051e-07	1.00241e-07	5.50395e-08	3.47339e-08	1.26242e-07	1.02969e-07	1.5359e-06	2.5286e-08	1.35988e-06	6.12405e-08	1.0882e-07	6.91871e-07	1.89092e-08	7.05504e-09	2.14167e-08	1.22352e-07	1.13699e-07	1.30043e-07	6.73821e-09	6.01358e-09	1.00515e-08	1.04624e-08	5.33902e-09	7.40647e-09	8.52653e-09	2.30919e-08	2.08434e-08	1.36917e-08	4.32337e-08	6.26511e-08
K00453	tryptophan 2,3-dioxygenase [EC:1.13.11.11]	1.84364e-06	1.68998e-06	2.07014e-06	7.69085e-06	7.52126e-06	6.36746e-06	7.74324e-07	1.38247e-07	2.42421e-07	6.10356e-07	1.6192e-06	1.27697e-06	7.38676e-06	1.2355e-07	9.35284e-06	3.93605e-07	7.3275e-07	3.68554e-06	2.97537e-07	9.58855e-08	3.55716e-07	2.42011e-06	2.07328e-06	2.53604e-06	4.39737e-08	1.27129e-08	4.38086e-08	3.01951e-07	2.02846e-07	1.00374e-07	7.35943e-08	4.69579e-08	1.30241e-07	9.56438e-08	1.90074e-07	4.05559e-07
K00455	3,4-dihydroxyphenylacetate 2,3-dioxygenase [EC:1.13.11.15]	2.62479e-07	2.12986e-07	2.42954e-07	7.54908e-07	7.17647e-07	6.2833e-07	1.26845e-07	0	2.22174e-08	5.00209e-08	1.83565e-07	1.29222e-07	2.46793e-06	4.15269e-08	2.44165e-06	3.60845e-08	0	1.13543e-06	3.85961e-08	2.21673e-08	3.38604e-08	1.77898e-07	1.6936e-07	2.05122e-07	5.32368e-10	0	2.83719e-09	1.11376e-08	6.39371e-09	2.13207e-09	3.36288e-08	2.64982e-08	8.56223e-08	5.54531e-09	1.10223e-08	9.65635e-08
K00457	4-hydroxyphenylpyruvate dioxygenase [EC:1.13.11.27]	4.72761e-05	4.82272e-05	5.36148e-05	3.20458e-05	3.2893e-05	3.29018e-05	2.80959e-05	2.73541e-05	2.73104e-05	5.9799e-05	5.48143e-05	5.22786e-05	5.19231e-05	3.15546e-05	5.29052e-05	3.52305e-05	3.35529e-05	4.29365e-05	5.90936e-05	6.82002e-05	6.39599e-05	2.81449e-05	3.22903e-05	3.15397e-05	2.62705e-05	2.51104e-05	3.05625e-05	6.58655e-05	7.59997e-05	6.00696e-05	3.12899e-05	3.02727e-05	3.39231e-05	3.77583e-05	3.0029e-05	3.29633e-05
K00459	nitronate monooxygenase [EC:1.13.12.16]	0.000421463	0.000417826	0.000402397	0.000444667	0.000450851	0.000448132	0.000312363	0.000327822	0.00031806	0.000311938	0.000314841	0.000311834	0.000303222	0.000363021	0.000400347	0.000401411	0.000413058	0.000409525	0.000445025	0.000397625	0.000445586	0.000377591	0.000438961	0.000409704	0.000256508	0.0002484	0.000274662	0.000282427	0.000225363	0.000207422	0.000333076	0.000250685	0.000274937	0.000230281	0.000330235	0.000375069
K00460	arachidonate 15-lipoxygenase [EC:1.13.11.33]	2.51161e-08	1.26239e-08	7.13641e-09	0	0	1.39563e-09	2.27459e-08	0	3.83965e-09	0	4.18305e-08	1.14738e-08	5.9457e-07	1.00046e-08	4.25733e-07	0	0	2.73546e-07	1.39235e-09	1.03471e-09	0	0	0	0	0	0	0	0	0	0	2.07805e-09	2.88185e-09	6.66455e-09	0	0	1.18709e-08
K00462	biphenyl-2,3-diol 1,2-dioxygenase [EC:1.13.11.39]	2.9621e-06	3.17114e-06	4.21669e-06	1.71495e-07	1.54642e-07	1.95465e-07	6.66674e-07	8.50962e-07	8.4653e-07	6.75044e-06	5.88342e-06	5.35285e-06	2.68534e-06	7.61597e-07	6.59255e-06	9.99126e-07	1.77927e-06	9.06947e-07	4.47796e-06	5.92115e-06	5.50305e-06	7.3477e-08	7.17324e-08	1.43806e-07	4.94063e-07	5.20726e-07	8.73986e-07	6.37296e-06	8.07229e-06	5.36334e-06	4.75809e-07	7.08855e-07	1.08595e-06	6.25121e-07	6.18187e-07	5.01004e-07
K00463	indoleamine 2,3-dioxygenase [EC:1.13.11.52]	1.48915e-09	0	1.97317e-09	8.6524e-10	0	0	0	3.94778e-10	2.86844e-09	0	0	0	0	0	3.18432e-07	0	5.05687e-08	4.99036e-10	0	1.74338e-10	0	0	0	0	0	0	0	0	0	3.38614e-10	0	0	9.7074e-10	1.51485e-10	0	0
K00464	all-trans-8'-apo-beta-carotenal 15,15'-oxygenase [EC:1.14.99.41]	4.49312e-06	4.59203e-06	4.91397e-06	2.98199e-06	1.89394e-06	2.26892e-06	1.54621e-06	1.65509e-06	1.93896e-06	6.86451e-07	1.32181e-06	1.01272e-06	5.12356e-07	1.36003e-06	4.47872e-06	1.15117e-06	8.87714e-07	2.27175e-06	2.28908e-06	2.52691e-06	2.42122e-06	4.48899e-06	3.05593e-06	4.37944e-06	1.33141e-06	1.39116e-06	1.19861e-06	4.83625e-07	8.49313e-07	6.13351e-07	1.67284e-06	3.14763e-06	3.86684e-06	1.27522e-06	2.17641e-06	1.82049e-06
K00466	tryptophan 2-monooxygenase [EC:1.13.12.3]	1.48059e-06	1.21266e-06	1.40859e-06	1.34687e-06	1.20523e-06	1.19254e-06	1.19749e-06	1.24813e-06	1.38354e-06	5.6782e-07	7.25955e-07	4.86056e-07	4.05128e-06	2.31238e-07	9.0363e-06	5.7714e-07	1.29128e-06	2.2455e-06	1.14256e-06	1.19916e-06	1.33986e-06	6.74544e-07	5.89672e-07	7.1085e-07	1.26475e-06	1.33285e-06	1.12708e-06	9.88853e-08	8.48729e-08	9.17276e-08	1.30772e-07	1.08859e-07	2.27393e-07	3.68295e-07	1.45305e-06	1.0214e-06
K00467	lactate 2-monooxygenase [EC:1.13.12.4]	9.88787e-06	9.66847e-06	9.09156e-06	8.73725e-06	9.27328e-06	9.45557e-06	7.15505e-06	7.1247e-06	6.99984e-06	4.85882e-06	4.42589e-06	4.63684e-06	7.48361e-06	9.92259e-06	1.62835e-05	9.9381e-06	1.1773e-05	1.0536e-05	1.14807e-05	9.8886e-06	1.11736e-05	8.49041e-06	1.11905e-05	9.90271e-06	6.0051e-06	5.59954e-06	6.65229e-06	5.06721e-06	3.37784e-06	2.89167e-06	8.8219e-06	6.86551e-06	7.40243e-06	6.11977e-06	7.48973e-06	9.36134e-06
K00468	[EC:1.13.12.-]	1.56033e-08	0	2.66468e-08	1.41141e-08	0	0	0	4.13649e-09	3.00556e-08	0	0	0	0	0	3.05128e-06	0	5.2986e-07	5.22891e-09	2.01107e-10	5.07098e-09	0	0	0	0	0	0	0	0	0	9.43087e-09	4.32638e-10	4.16246e-10	2.8244e-08	4.21908e-09	0	6.97846e-10
K00470	[EC:1.14.1.-]	2.41066e-08	1.08093e-08	2.19296e-08	1.08453e-09	4.84811e-10	1.19501e-09	1.94762e-08	6.8949e-10	8.29752e-09	0	4.59081e-08	1.32842e-08	5.09102e-07	8.56645e-09	1.92448e-06	3.843e-10	8.83196e-08	2.35096e-07	1.22649e-08	1.44434e-08	0	0	0	0	9.26202e-11	0	0	1.73789e-09	0	1.98639e-09	2.89097e-08	2.53856e-08	7.85778e-08	8.88648e-10	4.50111e-09	5.35736e-08
K00471	gamma-butyrobetaine dioxygenase [EC:1.14.11.1]	4.74e-08	2.3538e-08	1.31007e-08	7.6304e-08	7.56944e-08	3.93425e-07	4.2411e-08	1.50987e-10	8.25631e-09	0	1.40229e-07	4.27311e-08	1.10861e-06	1.86541e-08	9.46974e-07	0	1.93406e-08	5.10233e-07	2.3652e-09	6.40854e-10	0	0	0	0	0	0	0	1.07184e-08	0	1.24723e-08	4.57367e-10	4.89543e-09	7.94213e-09	5.57972e-09	2.77604e-08	3.34539e-08
K00472	prolyl 4-hydroxylase [EC:1.14.11.2]	1.17943e-06	1.12333e-06	1.36522e-06	4.93734e-06	4.71858e-06	4.0989e-06	3.92915e-07	9.9959e-08	1.0207e-07	3.32162e-07	2.35017e-07	5.96419e-07	3.35418e-06	5.58815e-08	2.54148e-06	2.74105e-07	7.2639e-08	1.52806e-06	1.77075e-07	4.7886e-08	2.22753e-07	1.14266e-06	1.0494e-06	1.24361e-06	9.49489e-09	6.01358e-09	1.00515e-08	6.32148e-08	4.33565e-08	1.7523e-09	2.95604e-08	3.30162e-08	4.40908e-08	3.84636e-08	4.43698e-08	1.8275e-07
K00476	aspartate beta-hydroxylase [EC:1.14.11.16]	2.67219e-08	1.31457e-08	7.79e-09	4.61354e-10	0	1.45332e-09	2.36861e-08	1.50475e-10	5.09171e-09	0	8.15993e-08	2.49905e-08	6.19147e-07	1.04181e-08	4.82172e-07	0	1.9275e-08	2.85043e-07	1.49996e-09	6.51647e-10	0	0	0	0	0	0	0	6.55154e-09	0	7.41554e-09	1.01674e-09	3.10457e-09	5.73062e-09	3.31748e-09	1.69684e-08	2.03677e-08
K00477	phytanoyl-CoA hydroxylase [EC:1.14.11.18]	8.61807e-08	4.33163e-08	2.11072e-08	0	0	4.7888e-09	7.80477e-08	0	1.31749e-08	0	1.43533e-07	3.93699e-08	2.04014e-06	3.43286e-08	8.92755e-07	0	0	9.38616e-07	1.51434e-09	0	0	0	0	0	0	0	0	0	0	0	0	3.13434e-09	3.07097e-09	0	0	2.9321e-08
K00478	[EC:1.14.11.-]	4.74596e-08	9.75525e-09	4.31728e-08	1.73935e-08	0	1.07848e-09	1.75771e-08	7.43638e-09	5.69996e-08	0	3.23249e-08	8.86647e-09	4.5946e-07	7.73114e-09	4.80431e-06	0	9.52556e-07	2.20786e-07	2.83575e-09	3.94103e-09	0	0	0	0	0	0	0	0	0	7.6546e-09	0	5.86936e-09	2.76949e-08	3.42443e-09	0	1.09746e-08
K00479	Rieske 2Fe-2S family protein	6.28825e-07	4.34179e-07	5.56815e-07	2.33119e-07	1.78495e-07	3.86513e-07	4.14752e-07	2.60998e-07	3.11981e-07	6.09113e-07	1.49969e-06	8.08316e-07	7.24537e-06	1.86025e-07	1.56686e-05	1.5662e-07	2.47856e-06	3.30006e-06	4.18081e-07	5.58698e-07	5.00612e-07	3.26019e-08	3.24952e-08	3.52164e-08	5.57318e-08	5.72969e-08	9.57695e-08	6.62336e-07	7.34408e-07	6.07872e-07	6.16664e-08	1.16189e-07	2.28222e-07	1.23273e-07	3.25336e-07	3.12453e-07
K00480	salicylate hydroxylase [EC:1.14.13.1]	1.3215e-05	1.25593e-05	1.4504e-05	1.50209e-05	1.42016e-05	1.39471e-05	1.44166e-05	1.53816e-05	1.48522e-05	3.93198e-05	4.42255e-05	4.33386e-05	2.41476e-05	8.43024e-06	4.88785e-05	1.34282e-05	1.29053e-05	2.28365e-05	1.0887e-05	1.82798e-05	1.10592e-05	1.11008e-05	8.75536e-06	1.03783e-05	1.32021e-05	1.25991e-05	1.40759e-05	3.05507e-05	3.67731e-05	3.75907e-05	1.4613e-05	1.73146e-05	1.73592e-05	2.97217e-05	1.32213e-05	1.19526e-05
K00481	p-hydroxybenzoate 3-monooxygenase [EC:1.14.13.2]	5.81568e-06	6.10438e-06	8.01562e-06	1.58756e-06	1.4753e-06	1.55057e-06	1.45039e-06	1.53298e-06	1.54714e-06	1.20655e-05	1.11575e-05	9.82361e-06	9.85841e-06	1.45928e-06	1.60945e-05	1.86448e-06	2.78563e-06	3.9383e-06	8.13756e-06	1.07143e-05	9.99265e-06	3.85836e-07	3.62347e-07	5.40768e-07	8.92723e-07	9.40109e-07	1.57426e-06	1.15481e-05	1.45688e-05	9.75381e-06	8.72234e-07	1.29899e-06	2.04714e-06	1.16437e-06	1.23271e-06	1.06098e-06
K00483	4-hydroxyphenylacetate-3-monooxygenase large chain [EC:1.14.14.9]	9.51951e-06	8.91718e-06	9.55492e-06	1.81753e-05	1.75246e-05	1.5747e-05	4.6032e-05	3.68841e-05	4.24269e-05	1.38036e-05	1.20143e-05	1.26604e-05	4.75579e-05	1.70857e-05	4.96323e-05	1.24759e-05	1.16168e-05	7.48949e-06	1.36846e-05	1.48482e-05	1.48548e-05	1.09463e-05	7.82727e-06	8.65819e-06	8.18936e-05	8.58696e-05	7.09304e-05	1.42032e-05	1.41489e-05	1.36087e-05	4.84524e-05	4.63081e-05	5.35584e-05	2.42545e-05	4.54741e-05	3.26104e-05
K00484	4-hydroxyphenylacetate-3-monooxygenase small chain [EC:1.14.14.9]	1.83717e-06	1.98837e-06	2.62731e-06	4.62323e-08	4.32333e-08	6.35567e-08	4.18571e-07	5.30411e-07	4.94133e-07	4.17507e-06	3.64485e-06	3.29923e-06	1.70487e-06	4.797e-07	1.83414e-06	6.26452e-07	4.40294e-07	5.70846e-07	2.82493e-06	3.73582e-06	3.46266e-06	2.48915e-08	2.66823e-08	7.04633e-08	3.10844e-07	3.2782e-07	5.49356e-07	3.99944e-06	5.07608e-06	3.36586e-06	3.22916e-07	4.61146e-07	7.23967e-07	3.87255e-07	3.7424e-07	3.3226e-07
K00485	dimethylaniline monooxygenase (N-oxide forming) [EC:1.14.13.8]	1.72816e-06	1.64568e-06	1.85166e-06	6.48876e-07	6.19142e-07	6.09382e-07	1.25456e-07	3.75985e-08	1.13582e-07	5.01529e-08	3.30771e-07	1.86774e-07	1.78519e-06	3.00386e-08	9.49421e-06	1.01192e-06	3.13096e-06	8.47792e-07	3.24422e-07	3.43729e-07	2.14889e-07	3.28399e-07	2.81781e-07	4.05927e-07	7.99681e-08	5.09596e-08	7.28616e-08	5.80602e-08	3.46959e-08	7.27699e-08	5.07718e-08	4.76336e-08	1.38989e-07	3.99146e-07	5.5313e-07	7.65083e-07
K00486	kynurenine 3-monooxygenase [EC:1.14.13.9]	2.18089e-07	1.38433e-07	1.30837e-07	2.93037e-07	2.69791e-07	2.41622e-07	1.5179e-07	1.0493e-09	3.35533e-08	1.90102e-08	2.61767e-07	1.01879e-07	3.64556e-06	6.13424e-08	4.10936e-06	1.40852e-08	1.34409e-07	1.67855e-06	1.91009e-08	9.03385e-09	1.28684e-08	6.52133e-08	5.98055e-08	7.11737e-08	2.91853e-10	0	0	4.49288e-09	2.42989e-09	1.24139e-08	2.29873e-09	1.92451e-08	5.4609e-08	7.29856e-09	2.97651e-09	7.18389e-08
K00491	nitric-oxide synthase, bacterial [EC:1.14.13.39]	2.06283e-06	2.07862e-06	2.6421e-06	9.94579e-06	9.57827e-06	8.2503e-06	6.55512e-07	4.44372e-07	2.69046e-07	6.66157e-07	6.05947e-09	1.09935e-06	1.46809e-07	0	4.53004e-06	6.99992e-07	5.52294e-07	2.91021e-09	3.47613e-07	1.01524e-07	4.4166e-07	2.29938e-06	2.11531e-06	2.49408e-06	4.95616e-08	2.66253e-08	4.45031e-08	1.28277e-07	8.91303e-08	1.32403e-08	7.39859e-08	1.01586e-07	1.14657e-07	9.89049e-08	1.70271e-07	3.29312e-07
K00492	[EC:1.14.13.-]	6.3941e-06	5.46814e-06	7.44191e-06	1.19066e-05	1.11348e-05	9.72466e-06	2.62717e-06	1.86548e-06	2.37579e-06	6.16747e-06	7.35205e-06	6.3584e-06	3.05382e-05	1.09228e-06	0.000122748	1.84024e-06	1.99631e-05	1.38011e-05	4.12522e-06	5.09163e-06	4.97765e-06	2.68456e-06	2.49585e-06	2.97373e-06	5.02308e-07	4.86762e-07	8.21597e-07	5.44153e-06	6.68137e-06	4.71436e-06	5.82098e-07	9.68679e-07	1.9523e-06	8.04265e-07	1.15598e-06	1.61975e-06
K00493	unspecific monooxygenase [EC:1.14.14.1]	7.5548e-07	7.16385e-07	9.8444e-07	3.43706e-06	3.24951e-06	2.81384e-06	2.22568e-07	1.44653e-07	1.64382e-07	2.27431e-07	1.86471e-07	4.35319e-07	2.47356e-07	3.41822e-09	1.01715e-05	2.18318e-07	1.55339e-06	1.08026e-07	1.15536e-07	5.16599e-08	1.5116e-07	7.84455e-07	7.21396e-07	8.51498e-07	1.23596e-08	8.01834e-09	1.34023e-08	7.30245e-08	3.02695e-08	6.93878e-08	2.43457e-08	2.44321e-08	1.26468e-07	6.15052e-08	1.28141e-07	1.4464e-07
K00494	alkanal monooxygenase alpha chain [EC:1.14.14.3]	0	0	0	0	0	0	0	0	0	0	0	0	0	0	4.58335e-08	0	0	0	2.69419e-10	0	0	0	0	0	0	0	0	0	0	0	0	5.57637e-10	5.46361e-10	0	0	4.72073e-10
K00495	[EC:1.14.14.-]	5.13981e-08	2.55821e-08	1.35574e-08	4.07052e-10	0	2.82821e-09	4.60941e-08	1.32764e-10	8.74563e-09	0	1.13013e-07	3.29355e-08	1.20488e-06	2.02741e-08	9.35285e-07	0	1.70063e-08	5.54504e-07	2.505e-09	4.38778e-10	0	0	0	0	0	0	0	4.86456e-09	0	5.54556e-09	6.23597e-10	5.18478e-09	6.94681e-09	2.48091e-09	1.25992e-08	2.71964e-08
K00496	alkane 1-monooxygenase [EC:1.14.15.3]	2.52196e-07	8.14414e-08	1.633e-07	5.2425e-08	0	9.00369e-09	1.46742e-07	2.39025e-08	1.98446e-07	0	3.64587e-07	1.06499e-07	3.83578e-06	6.45432e-08	1.71083e-05	0	3.06178e-06	1.79496e-06	1.34328e-08	1.48887e-08	0	0	0	0	0	0	0	1.63142e-08	0	3.83082e-08	8.65711e-09	2.78027e-08	1.02142e-07	1.71379e-08	4.22536e-08	1.02588e-07
K00499	choline monooxygenase [EC:1.14.15.7]	2.69168e-07	1.3529e-07	6.5924e-08	0	0	1.49568e-08	2.43766e-07	0	4.11492e-08	0	4.48295e-07	1.22964e-07	6.37196e-06	1.07218e-07	3.49554e-06	0	0	2.93157e-06	1.20942e-08	0	0	0	0	0	0	0	0	0	0	0	0	2.50323e-08	2.45262e-08	0	0	1.04482e-07
K00500	phenylalanine-4-hydroxylase [EC:1.14.16.1]	8.15478e-06	8.54994e-06	1.1037e-05	1.25249e-05	1.19547e-05	1.05087e-05	1.91401e-06	1.54359e-06	1.56724e-06	1.29859e-05	1.08914e-05	1.09834e-05	9.0185e-06	1.4645e-06	6.55905e-06	2.41576e-06	1.24846e-06	3.52736e-06	8.64034e-06	1.09568e-05	1.0643e-05	2.94239e-06	2.71963e-06	3.35502e-06	9.11464e-07	9.54176e-07	1.60357e-06	1.17977e-05	1.48814e-05	9.79663e-06	9.2959e-07	1.31744e-06	2.01012e-06	1.20357e-06	1.12313e-06	1.20206e-06
K00505	tyrosinase [EC:1.14.18.1]	1.26964e-07	1.0352e-07	1.20895e-07	4.31462e-07	4.08189e-07	3.5911e-07	9.23162e-08	6.69653e-08	3.86545e-08	2.80668e-08	1.14234e-07	8.63658e-08	1.07946e-06	1.77916e-08	1.48643e-06	4.48719e-08	8.99238e-08	4.86965e-07	1.46735e-08	7.69553e-09	1.76021e-08	9.84142e-08	9.12489e-08	1.05082e-07	4.66541e-09	4.00917e-09	6.70117e-09	1.2407e-08	4.18708e-09	1.43125e-08	6.03177e-09	1.44326e-08	2.60831e-08	1.37728e-08	4.0655e-08	4.92812e-08
K00507	stearoyl-CoA desaturase (delta-9 desaturase) [EC:1.14.19.1]	7.11357e-06	7.54647e-06	9.70225e-06	2.04569e-07	1.70852e-07	2.68463e-07	1.90142e-06	1.93282e-06	1.8836e-06	1.51903e-05	1.39389e-05	1.21884e-05	1.60971e-05	1.9118e-06	1.35343e-05	2.27924e-06	1.9878e-06	6.63281e-06	1.05474e-05	1.37912e-05	1.28807e-05	1.00072e-07	1.15173e-07	2.83286e-07	1.13096e-06	1.19272e-06	2.00302e-06	1.45482e-05	1.84685e-05	1.22563e-05	1.08836e-06	1.67867e-06	2.51412e-06	1.61776e-06	1.36091e-06	1.26559e-06
K00508	linoleoyl-CoA desaturase [EC:1.14.19.3]	4.56011e-07	6.48851e-08	5.15752e-07	2.29264e-07	4.68486e-08	7.17333e-09	1.16911e-07	8.6667e-08	6.49455e-07	0	2.15003e-07	5.89736e-08	3.056e-06	5.14222e-08	5.88435e-05	3.7136e-08	1.11015e-05	1.51554e-06	1.60115e-08	6.82126e-08	0	0	0	0	8.95015e-09	0	0	0	0	1.20153e-07	1.27546e-08	3.31401e-08	4.00501e-07	5.37528e-08	0	7.81862e-08
K00510	heme oxygenase [EC:1.14.99.3]	5.12324e-07	4.14059e-07	6.68055e-07	2.87095e-06	2.7274e-06	2.3882e-06	6.92598e-07	1.16562e-06	6.28883e-07	1.77262e-07	1.56549e-08	4.27043e-07	3.79287e-07	0	1.84803e-05	5.78063e-07	3.67647e-06	2.97188e-08	8.16349e-08	6.10795e-08	9.60227e-08	6.44676e-07	6.08299e-07	6.63666e-07	8.34811e-08	6.87875e-08	1.14976e-07	4.04827e-08	3.29446e-08	6.57362e-08	8.19708e-08	2.2028e-07	2.44393e-07	1.27924e-07	3.89669e-07	3.3561e-07
K00514	zeta-carotene desaturase [EC:1.3.5.6]	4.17509e-06	3.4626e-06	2.54585e-06	1.35309e-05	1.29029e-05	1.1584e-05	6.17182e-06	7.70858e-06	7.06594e-06	2.23289e-05	2.69165e-05	2.58475e-05	5.83527e-06	5.42983e-06	1.15705e-05	8.82633e-06	6.60597e-06	1.00982e-05	4.79752e-07	3.9e-07	7.49168e-07	3.67287e-06	3.96028e-06	3.41269e-06	4.58068e-07	6.73059e-07	5.52533e-07	2.55516e-06	1.96002e-06	1.12602e-06	2.76669e-06	1.49667e-06	2.18675e-06	6.01821e-07	2.34993e-06	3.23764e-06
K00517	[EC:1.14.-.-]	1.26433e-05	1.09967e-05	1.59491e-05	4.20819e-05	3.93511e-05	3.41287e-05	3.14447e-06	1.58604e-06	4.26194e-06	6.72057e-06	5.04317e-06	7.94647e-06	1.82377e-05	9.00196e-07	0.000267754	2.94463e-06	5.5375e-05	8.62861e-06	4.08496e-06	4.13631e-06	5.09287e-06	1.08541e-05	9.77148e-06	1.1433e-05	3.93757e-07	3.45598e-07	5.86866e-07	4.33295e-06	5.09628e-06	3.74588e-06	6.89359e-07	7.6225e-07	2.58635e-06	9.4086e-07	9.02022e-07	1.72382e-06
K00518	superoxide dismutase [EC:1.15.1.1]	2.36279e-06	2.04799e-06	2.37479e-06	1.48645e-06	1.33482e-06	1.39417e-06	1.91921e-06	2.23686e-06	2.50821e-06	8.44282e-07	8.19298e-07	6.44306e-07	1.03097e-07	3.29251e-07	2.2761e-06	1.03572e-06	5.91959e-07	8.2989e-07	2.2445e-06	2.36572e-06	2.63379e-06	1.0821e-06	9.30833e-07	1.13888e-06	2.51909e-06	2.65102e-06	2.22956e-06	1.69584e-07	1.57887e-07	1.30472e-07	2.38827e-07	1.6255e-07	3.14914e-07	6.88326e-07	2.78914e-06	1.83025e-06
K00520	mercuric reductase [EC:1.16.1.1]	0.000393367	0.000386704	0.000382344	0.000381256	0.000386884	0.000388476	0.000309809	0.000327926	0.000320043	0.000339248	0.000350441	0.000347398	0.000261127	0.000318954	0.000336359	0.000357244	0.000345592	0.000381379	0.000409363	0.000394306	0.000412302	0.000391594	0.000407103	0.000402119	0.000281221	0.000274586	0.000296316	0.000369367	0.000354032	0.000360061	0.000342923	0.000275547	0.000300884	0.000293358	0.000341389	0.000359085
K00523	CDP-4-dehydro-6-deoxyglucose reductase [EC:1.17.1.1]	6.68678e-06	7.06886e-06	9.24794e-06	4.47563e-07	5.13019e-07	5.39464e-07	1.76127e-06	1.9032e-06	1.85107e-06	1.46525e-05	1.36587e-05	1.1817e-05	1.17048e-05	1.77249e-06	1.14307e-05	2.20545e-06	2.40314e-06	4.7912e-06	9.87465e-06	1.30296e-05	1.21141e-05	4.62312e-07	3.53169e-07	5.84857e-07	1.10433e-06	1.15033e-06	1.93401e-06	1.4074e-05	1.78057e-05	1.18031e-05	1.07365e-06	1.58762e-06	2.39779e-06	1.37406e-06	1.3648e-06	1.20903e-06
K00524	ribonucleotide reductase, class II [EC:1.17.4.1]	2.4513e-07	1.35106e-06	6.80574e-07	5.17906e-06	4.2147e-06	4.07012e-06	4.41987e-08	0	2.95055e-07	1.38754e-06	2.46368e-06	7.64006e-07	5.79605e-08	9.75278e-10	3.33414e-08	4.38498e-08	0	2.66661e-08	5.75187e-07	4.47514e-07	5.70554e-07	1.71434e-06	1.52558e-06	1.5291e-06	4.90494e-08	8.31344e-08	0	2.85922e-07	8.78434e-08	1.70297e-07	4.57898e-09	2.59344e-10	4.48589e-09	5.94339e-09	2.10686e-09	5.62397e-08
K00525	ribonucleoside-diphosphate reductase alpha chain [EC:1.17.4.1]	0.00162067	0.00166671	0.00168718	0.00139748	0.00141598	0.00143803	0.00149677	0.0015223	0.00148458	0.00171542	0.00168552	0.00168772	0.00172123	0.00192367	0.00150689	0.00166313	0.00175138	0.00165078	0.00153578	0.00148329	0.00151538	0.00138704	0.00149856	0.00144587	0.00118679	0.00116205	0.00123134	0.00132474	0.00127407	0.00124331	0.00145173	0.00175299	0.00151163	0.00165159	0.0012871	0.00138847
K00526	ribonucleoside-diphosphate reductase beta chain [EC:1.17.4.1]	0.000201963	0.000199769	0.000191563	0.000184798	0.000195338	0.000196979	0.000143696	0.000145492	0.000138632	0.000118321	0.000105415	0.000110342	0.000159121	0.000193556	0.000249609	0.000197553	0.000214052	0.000207643	0.000236125	0.0002097	0.000233552	0.000168119	0.000219509	0.000195462	0.000117708	0.000109921	0.000131602	0.000118554	9.13824e-05	7.28178e-05	0.00017178	0.000135025	0.000145906	0.000120286	0.000148334	0.000184067
K00527	ribonucleoside-triphosphate reductase [EC:1.17.4.2]	0.00127508	0.00127808	0.00127265	0.00123947	0.0012357	0.00124942	0.00117652	0.00119592	0.00118762	0.0013579	0.00136021	0.0013855	0.0012004	0.00132222	0.00106916	0.00134581	0.00129629	0.0013946	0.00123458	0.00129516	0.00121039	0.00122693	0.00127742	0.00126067	0.00100978	0.00098257	0.00106442	0.00122871	0.00126284	0.00130273	0.00117456	0.00126236	0.00119215	0.00152468	0.00117382	0.00122585
K00528	ferredoxin--NADP+ reductase [EC:1.18.1.2]	0.000385304	0.000408462	0.000438215	0.000305073	0.000298807	0.000299996	0.000394651	0.00039728	0.000390456	0.000519526	0.000506879	0.000513276	0.000518255	0.000528686	0.000421328	0.000417827	0.00047584	0.000375388	0.000275101	0.000304791	0.000270749	0.000308416	0.000282492	0.000295343	0.000280079	0.000280562	0.000283857	0.000362397	0.000391809	0.000398582	0.000340583	0.000536889	0.000413127	0.000528305	0.000301566	0.000297373
K00529	ferredoxin--NAD+ reductase [EC:1.18.1.3]	0.000356257	0.000352459	0.000344959	0.000325588	0.000334037	0.000331557	0.000264987	0.000262247	0.000262772	0.000202381	0.000195575	0.000196119	0.000279034	0.000323018	0.00034193	0.000343938	0.000378052	0.000315311	0.000340398	0.000302832	0.000335883	0.000293963	0.000338414	0.000318467	0.000232724	0.000228583	0.00024124	0.000203546	0.000172117	0.000170774	0.000296936	0.000246722	0.00025604	0.000217246	0.000283062	0.000316429
K00531	nitrogenase [EC:1.18.6.1]	2.74218e-06	2.08343e-06	1.6674e-06	7.50503e-06	7.07361e-06	6.70414e-06	3.57024e-06	6.04461e-06	4.52255e-06	2.01416e-05	2.43609e-05	2.35189e-05	2.04796e-07	6.19405e-07	2.91761e-06	4.01034e-06	8.80755e-07	6.46081e-06	1.58971e-07	9.96472e-08	1.7668e-07	3.23561e-06	3.32432e-06	2.96787e-06	2.97039e-07	1.65226e-07	1.794e-07	1.8798e-06	1.25018e-06	7.6204e-07	5.14014e-07	4.65927e-07	6.08473e-07	1.40382e-07	4.33045e-07	9.47277e-07
K00532	ferredoxin hydrogenase [EC:1.12.7.2]	0.000584018	0.000572314	0.000533661	0.000587772	0.00061361	0.000611418	0.000463893	0.000465275	0.000452836	0.000370567	0.000360665	0.000369319	0.000470179	0.000595101	0.000537779	0.000619365	0.000626448	0.000627916	0.00064878	0.000562951	0.000636336	0.000507537	0.000650133	0.000580114	0.000384289	0.000367979	0.000413929	0.000302781	0.000216526	0.000190865	0.000539362	0.000415643	0.000450784	0.000357802	0.000473792	0.000566555
K00533	ferredoxin hydrogenase large subunit [EC:1.12.7.2]	0.000532031	0.000521392	0.000495077	0.000465959	0.000490636	0.000498819	0.000445717	0.000438296	0.000436541	0.000263214	0.000238199	0.000248058	0.000418917	0.000509022	0.000451337	0.000520689	0.000520288	0.000524912	0.000613483	0.000539973	0.000605664	0.000440103	0.000566421	0.00050804	0.000452219	0.000440487	0.00046298	0.000262011	0.000184659	0.000162536	0.000508208	0.000405853	0.000441817	0.000345981	0.000478482	0.000533808
K00534	ferredoxin hydrogenase small subunit [EC:1.12.7.2]	1.06077e-05	9.83815e-06	1.09086e-05	6.48424e-06	5.89866e-06	6.10411e-06	1.75288e-05	1.64527e-05	1.87739e-05	4.74679e-06	4.40365e-06	3.69241e-06	1.03915e-05	4.07248e-06	8.71909e-06	5.34519e-06	2.35904e-06	3.80179e-06	1.16278e-05	1.24559e-05	1.3374e-05	4.97136e-06	4.03385e-06	4.98664e-06	2.947e-05	3.08727e-05	2.56879e-05	1.91256e-06	2.08226e-06	1.85608e-06	1.22057e-05	1.16483e-05	1.37603e-05	8.34996e-06	2.09415e-05	1.39861e-05
K00535	[EC:1.18.-.-]	3.07219e-05	3.01613e-05	3.30138e-05	2.37147e-05	2.11093e-05	2.4702e-05	6.62347e-05	5.90574e-05	6.51565e-05	5.18053e-05	5.00451e-05	5.50382e-05	5.63808e-05	2.80135e-05	2.79563e-05	3.56056e-05	1.99369e-05	4.58208e-05	3.79797e-05	6.42966e-05	3.56869e-05	5.4687e-05	3.67654e-05	4.66585e-05	0.000105112	0.000105659	0.000100986	0.000101836	0.000124435	0.000139704	7.55538e-05	8.34966e-05	8.84664e-05	0.000130306	8.29573e-05	6.48322e-05
K00537	arsenate reductase [EC:1.20.4.1]	0.000138262	0.000135638	0.000130359	0.000134423	0.000140692	0.000140636	9.89219e-05	0.000101891	9.6778e-05	9.79129e-05	9.3878e-05	9.62675e-05	0.000103115	0.00012738	0.000123749	0.000134079	0.00013255	0.000142724	0.000157022	0.000139605	0.000155819	0.000113484	0.000147503	0.000131791	7.97794e-05	7.46696e-05	8.83262e-05	7.95668e-05	6.11164e-05	4.84047e-05	0.000112924	8.87326e-05	9.58804e-05	7.9418e-05	9.97564e-05	0.000122838
K00539	[EC:1.97.1.-]	3.1746e-09	1.59562e-09	7.77517e-10	6.07107e-09	6.09512e-09	3.16465e-08	2.87501e-09	0	4.8532e-10	0	5.28725e-09	1.45025e-09	7.51518e-08	1.26455e-09	5.04105e-08	0	0	3.45754e-08	1.7277e-10	0	0	0	0	0	0	0	0	0	0	0	0	3.57595e-10	3.50364e-10	0	0	1.28507e-09
K00540	[EC:1.-.-.-]	0.00148839	0.00148882	0.00151964	0.00147209	0.00147148	0.001463	0.00129887	0.00132491	0.00130273	0.00148616	0.00147117	0.00148151	0.00142696	0.00137012	0.00188155	0.00142064	0.00155074	0.00144658	0.00145451	0.00147918	0.00146203	0.00145144	0.00142952	0.00144841	0.0011832	0.00117208	0.0012258	0.00161205	0.00164909	0.0016143	0.00130307	0.00130192	0.00129929	0.00137845	0.00130938	0.00135586
K00543	acetylserotonin N-methyltransferase [EC:2.1.1.4]	1.33667e-08	6.71839e-09	3.27374e-09	0	0	7.42747e-10	1.21052e-08	0	2.04344e-09	0	2.2262e-08	6.10629e-09	3.16427e-07	5.3244e-09	1.12882e-07	0	0	1.4558e-07	0	0	0	0	0	0	0	0	0	0	0	0	0	0	0	0	0	4.13616e-09
K00544	betaine-homocysteine S-methyltransferase [EC:2.1.1.5]	0	0	0	1.93865e-08	1.20713e-07	2.5529e-07	0	0	0	0	0	0	0	0	4.82955e-08	1.0405e-09	0	0	5.49475e-08	1.19451e-07	4.01852e-07	6.30917e-07	1.26729e-06	5.29188e-07	6.70742e-08	0	0	2.98326e-06	4.66119e-06	1.26444e-05	1.43938e-05	2.26341e-06	3.10447e-06	3.16569e-06	1.76608e-06	4.9743e-10
K00545	catechol O-methyltransferase [EC:2.1.1.6]	2.79815e-08	0	3.16556e-08	1.15129e-08	0	0	0	7.41799e-09	5.38989e-08	0	0	0	0	0	3.64437e-06	0	9.50201e-07	9.37703e-09	0	4.28766e-10	0	0	0	0	0	0	0	0	0	8.32786e-10	0	0	2.38744e-09	3.72562e-10	0	0
K00547	homocysteine S-methyltransferase [EC:2.1.1.10]	0.000117874	0.000119664	0.000120143	0.000176968	0.000171963	0.000164165	0.000103527	0.000116554	0.000104509	0.000150784	0.000159832	0.000154735	7.94109e-05	8.6535e-05	0.000110606	0.000107714	0.000128893	8.34815e-05	8.09624e-05	7.41624e-05	8.1516e-05	0.000198807	0.000136684	0.000162672	8.58551e-05	9.02046e-05	8.83929e-05	0.000226278	0.000231444	0.000230296	7.88708e-05	7.09024e-05	8.24529e-05	5.4849e-05	0.000100003	0.000104049
K00548	5-methyltetrahydrofolate--homocysteine methyltransferase [EC:2.1.1.13]	0.00131138	0.0012632	0.0012071	0.00165625	0.00165896	0.00161287	0.00107832	0.00122336	0.00113216	0.00186395	0.00209287	0.00203549	0.000890617	0.00108563	0.00125856	0.00135424	0.00125317	0.00144286	0.0012123	0.00109747	0.00121325	0.0012875	0.00137673	0.00131908	0.000740635	0.000722085	0.000793083	0.00113772	0.00105223	0.00102817	0.00103057	0.000772259	0.000851446	0.000699524	0.000977398	0.00111616
K00549	5-methyltetrahydropteroyltriglutamate--homocysteine methyltransferase [EC:2.1.1.14]	0.000166343	0.000180237	0.000202756	0.00017519	0.000161535	0.000156188	0.000213591	0.000205673	0.000215068	0.00030499	0.000282534	0.00029249	0.000317605	0.000276783	0.000254632	0.000204145	0.000217088	0.000201119	0.000106368	0.00016089	0.000113137	0.000155818	0.000118563	0.000137477	0.000137914	0.000141642	0.00014223	0.00019888	0.000247772	0.000244165	0.000151039	0.00029074	0.0002204	0.000337969	0.000157764	0.000134938
K00551	phosphatidylethanolamine N-methyltransferase [EC:2.1.1.17]	6.48673e-08	2.07031e-08	2.28446e-08	7.58626e-08	7.24312e-08	6.32351e-08	1.10093e-08	0	1.94084e-09	5.11935e-09	8.70076e-08	3.68644e-08	2.01017e-07	3.38242e-09	1.04616e-07	3.61697e-09	0	9.24825e-08	5.95083e-09	7.36677e-09	1.30471e-08	1.75616e-08	1.61053e-08	1.91667e-08	3.61519e-11	0	0	1.35142e-08	6.54358e-10	1.36636e-08	1.37088e-08	6.3505e-08	3.17186e-08	9.46987e-09	3.26696e-08	2.16127e-08
K00554	tRNA (guanine37-N1)-methyltransferase [EC:2.1.1.228]	0.000240791	0.000236644	0.00023459	0.000290225	0.000283049	0.000274434	0.000315868	0.000300809	0.000317444	0.000227553	0.000229963	0.000219125	0.00028545	0.000219779	0.000310559	0.000236249	0.000234204	0.000204349	0.000244645	0.000239435	0.000256394	0.000250825	0.000230904	0.000237464	0.000394793	0.000409373	0.000366517	0.000233672	0.000232061	0.000232099	0.000306838	0.000257653	0.000294507	0.00019286	0.000329715	0.000288888
K00555	tRNA (guanine26-N2/guanine27-N2)-dimethyltransferase [EC:2.1.1.215 2.1.1.216]	8.81541e-05	0.000103876	0.000121452	3.47214e-05	2.87127e-05	3.70627e-05	0.000141035	0.000135366	0.000136408	0.00022112	0.000210473	0.000224307	0.000217789	0.000211136	8.48765e-05	0.000128119	0.000132722	0.00013933	4.27429e-05	9.06895e-05	3.39538e-05	8.08994e-05	5.4595e-05	6.92659e-05	9.71327e-05	9.45073e-05	0.000100565	0.00015961	0.000199798	0.000218146	0.000115951	0.000268959	0.000186585	0.000327347	8.88768e-05	7.63432e-05
K00556	tRNA (guanosine-2'-O-)-methyltransferase [EC:2.1.1.34]	2.77169e-05	2.50588e-05	2.84763e-05	1.75717e-05	1.58479e-05	1.6496e-05	2.04018e-05	2.37701e-05	2.62829e-05	9.77044e-06	9.31032e-06	7.66623e-06	1.24516e-06	3.49755e-06	6.23585e-06	1.22485e-05	7.07837e-06	8.64813e-06	2.45349e-05	2.60279e-05	2.88782e-05	1.29066e-05	1.13344e-05	1.3511e-05	2.64752e-05	2.78454e-05	2.36094e-05	4.41162e-06	5.47488e-06	9.53414e-06	1.12911e-05	3.11978e-06	5.11206e-06	9.68459e-06	3.11379e-05	2.02237e-05
K00557	tRNA (uracil-5-)-methyltransferase [EC:2.1.1.35]	1.32541e-05	1.44407e-05	1.81463e-05	1.61972e-05	1.54972e-05	1.4283e-05	6.67407e-06	8.42369e-06	6.88927e-06	2.68954e-05	2.4276e-05	2.38865e-05	7.93123e-06	5.29184e-06	9.73043e-06	5.51066e-06	5.16921e-06	3.3416e-06	1.43858e-05	1.7919e-05	1.7342e-05	1.24631e-05	7.23547e-06	9.94011e-06	4.54132e-06	4.87083e-06	5.67736e-06	3.16552e-05	3.70633e-05	2.99672e-05	2.98546e-06	5.82515e-06	5.75952e-06	4.5147e-06	4.729e-06	4.05939e-06
K00558	DNA (cytosine-5-)-methyltransferase [EC:2.1.1.37]	0.000315723	0.000304908	0.000296169	0.000313519	0.000320701	0.000321286	0.000379789	0.000380301	0.000375136	0.000399673	0.00042758	0.000426848	0.000348861	0.000317609	0.000358963	0.000323255	0.000286394	0.00034657	0.000330782	0.000307736	0.000329298	0.00024944	0.000301789	0.000275816	0.000434506	0.000436117	0.000410934	0.000205787	0.000171979	0.000161152	0.000387354	0.000369	0.000384429	0.000283736	0.000348519	0.000343177
K00560	thymidylate synthase [EC:2.1.1.45]	0.00011095	0.00011019	0.000108889	0.000110747	0.000110753	0.000114498	0.000109209	0.000108678	0.000106627	0.000133114	0.000131391	0.000140951	0.000114752	0.000104499	0.000125231	0.000121423	0.000109533	0.000145687	0.000126246	0.000147538	0.000120813	0.000126	0.000129857	0.000129894	0.000114324	0.000108964	0.000122527	0.000163494	0.000177728	0.00018222	0.00012645	0.000129176	0.000134802	0.000189927	0.000122229	0.000128498
K00561	23S rRNA (adenine2085-N6)-dimethyltransferase [EC:2.1.1.184]	6.5901e-05	6.49848e-05	6.06914e-05	5.90369e-05	6.28652e-05	6.39721e-05	4.79815e-05	4.77253e-05	4.63412e-05	3.26486e-05	2.95455e-05	3.11375e-05	4.86116e-05	6.65604e-05	5.54707e-05	6.67472e-05	6.79427e-05	6.98548e-05	7.70544e-05	6.6272e-05	7.4965e-05	5.71228e-05	7.52298e-05	6.66136e-05	4.03048e-05	3.75768e-05	4.46415e-05	3.40053e-05	2.26731e-05	1.92784e-05	5.91394e-05	4.57758e-05	4.91964e-05	4.10011e-05	5.02439e-05	6.28104e-05
K00563	23S rRNA (guanine745-N1)-methyltransferase [EC:2.1.1.187]	5.27654e-05	5.17937e-05	5.18796e-05	4.53008e-05	4.67201e-05	4.764e-05	4.06575e-05	4.16024e-05	4.08548e-05	3.9958e-05	3.65614e-05	3.75392e-05	3.91265e-05	4.48566e-05	6.10784e-05	4.85104e-05	4.97696e-05	5.13892e-05	6.12372e-05	6.10147e-05	6.17137e-05	4.62405e-05	5.30992e-05	5.05559e-05	3.90266e-05	3.75153e-05	4.19499e-05	4.83179e-05	4.73125e-05	4.31499e-05	4.40264e-05	3.9086e-05	4.19412e-05	4.48545e-05	4.52978e-05	4.94411e-05
K00564	16S rRNA (guanine1207-N2)-methyltransferase [EC:2.1.1.172]	6.31585e-05	7.08065e-05	8.63286e-05	2.22383e-05	2.08395e-05	2.15385e-05	5.96626e-05	6.06833e-05	5.90563e-05	0.000124401	0.000117163	0.000117147	0.000105648	9.97059e-05	6.22664e-05	6.08911e-05	7.10528e-05	5.22608e-05	3.67462e-05	5.29197e-05	4.02388e-05	1.98825e-05	1.43151e-05	1.86459e-05	2.40122e-05	2.38511e-05	2.60774e-05	6.23738e-05	7.73817e-05	6.48892e-05	3.41783e-05	0.000105237	6.47624e-05	0.000102877	2.58783e-05	2.27849e-05
K00566	tRNA-specific 2-thiouridylase [EC:2.8.1.-]	0.000463682	0.000457579	0.000448318	0.000555746	0.000548192	0.00053239	0.000453339	0.000463419	0.000460972	0.000456475	0.000477036	0.000459453	0.000408425	0.000400016	0.000488541	0.000459786	0.000475168	0.000409487	0.000431856	0.000403024	0.000442345	0.000481943	0.000459273	0.000464748	0.000451955	0.000462763	0.000441432	0.00043166	0.000412246	0.000404394	0.000430785	0.000349188	0.000391864	0.000282245	0.000464057	0.000458356
K00567	methylated-DNA-[protein]-cysteine S-methyltransferase [EC:2.1.1.63]	0.000273448	0.000275809	0.000274562	0.000259401	0.000260881	0.000262397	0.000247659	0.000250381	0.000248525	0.000253505	0.000250625	0.000251043	0.000260308	0.000288329	0.000255563	0.000274561	0.000281308	0.00027351	0.000267848	0.000257104	0.000265974	0.000243895	0.000264897	0.000255561	0.00021806	0.000215033	0.00022297	0.0002093	0.000196694	0.000193824	0.000244952	0.000258157	0.000242308	0.000251768	0.00023732	0.000250261
K00568	2-polyprenyl-6-hydroxyphenyl methylase / 3-demethylubiquinone-9 3-methyltransferase [EC:2.1.1.222 2.1.1.64]	4.19525e-05	4.01437e-05	4.59722e-05	2.72709e-05	2.49631e-05	2.65541e-05	7.49987e-05	6.73247e-05	7.53567e-05	4.996e-05	4.8997e-05	4.70385e-05	6.75148e-05	2.62589e-05	5.30563e-05	2.87385e-05	1.57742e-05	3.35969e-05	4.99929e-05	6.54549e-05	5.40926e-05	4.00854e-05	2.7413e-05	3.51092e-05	0.00012414	0.000128083	0.00011281	6.91892e-05	8.29851e-05	8.20308e-05	6.96824e-05	7.63307e-05	8.59921e-05	7.79032e-05	8.68844e-05	6.35412e-05
K00569	thiopurine S-methyltransferase [EC:2.1.1.67]	5.33076e-06	5.76782e-06	7.58517e-06	1.63323e-07	1.51888e-07	2.89862e-07	1.21727e-06	1.53794e-06	1.43244e-06	1.21069e-05	1.05512e-05	9.56047e-06	5.03503e-06	1.39257e-06	3.33924e-06	1.81659e-06	1.25844e-06	1.69714e-06	8.17391e-06	1.0798e-05	1.0041e-05	7.75434e-08	8.75786e-08	2.19511e-07	9.01387e-07	9.50613e-07	1.59544e-06	1.15934e-05	1.47196e-05	9.75484e-06	8.66752e-07	1.3003e-06	1.93193e-06	1.12051e-06	1.07848e-06	8.72097e-07
K00570	phosphatidyl-N-methylethanolamine N-methyltransferase [EC:2.1.1.71]	8.90769e-06	1.20263e-05	1.3331e-05	8.85202e-06	7.709e-06	7.5314e-06	1.10343e-05	1.22042e-05	1.14075e-05	2.41458e-05	2.4933e-05	2.3536e-05	1.91791e-05	2.21384e-05	9.10084e-06	1.06737e-05	1.51501e-05	8.05232e-06	2.40148e-06	2.69054e-06	2.12756e-06	1.29009e-05	7.6971e-06	9.37038e-06	1.9359e-06	2.56587e-06	1.80734e-06	1.83292e-05	2.35911e-05	2.84301e-05	1.21252e-05	2.39156e-05	1.35365e-05	1.69137e-05	3.58694e-06	2.03678e-06
K00571	site-specific DNA-methyltransferase (adenine-specific) [EC:2.1.1.72]	0.000130181	0.000132996	0.000128747	0.000215995	0.000207556	0.000196715	0.000279176	0.000248098	0.000266761	0.000200952	0.000196901	0.000196885	0.00028777	0.000187949	0.000273619	0.000175443	0.000181328	0.000146228	0.000137031	0.000155625	0.000139589	0.000235734	0.000172093	0.000194342	0.000385429	0.000402546	0.000354937	0.000291739	0.000318637	0.000328023	0.000289055	0.000278458	0.000308363	0.000230044	0.000280321	0.000235481
K00573	protein-L-isoaspartate(D-aspartate) O-methyltransferase [EC:2.1.1.77]	0.000183452	0.000195242	0.000213992	0.000154821	0.00014457	0.000152125	0.000324505	0.00030821	0.000320541	0.000326829	0.000321807	0.000320786	0.00034702	0.000254906	0.000220242	0.000194006	0.000183197	0.000197628	0.000176709	0.000230451	0.000179889	0.000240597	0.000166101	0.000199791	0.000403013	0.000413742	0.000378511	0.000383418	0.000436655	0.000458768	0.000308135	0.000397219	0.00036655	0.000410028	0.000302307	0.000240247
K00574	cyclopropane-fatty-acyl-phospholipid synthase [EC:2.1.1.79]	0.000270387	0.000266604	0.00026747	0.000253027	0.000259567	0.000263587	0.000295399	0.000295271	0.000291376	0.000250729	0.000248939	0.000243464	0.000269417	0.000243486	0.000345344	0.00024719	0.000260098	0.000256924	0.000317237	0.000308932	0.000321824	0.000304457	0.000298778	0.000298814	0.000355506	0.000357054	0.000347408	0.000348409	0.000348235	0.000366444	0.000361595	0.000282691	0.000311377	0.000254922	0.000315858	0.000300571
K00575	chemotaxis protein methyltransferase CheR [EC:2.1.1.80]	0.000535822	0.000534284	0.000545667	0.000616469	0.000594738	0.000591618	0.000522337	0.000558984	0.000547445	0.000711445	0.000739914	0.000734236	0.000459402	0.00047808	0.000440145	0.000525921	0.000497952	0.000543946	0.000484705	0.000537936	0.00049459	0.000666447	0.000542142	0.000602355	0.000463467	0.000467929	0.00048079	0.000815111	0.000872247	0.000882522	0.000444537	0.000483339	0.000487257	0.000587919	0.000536768	0.000513773
K00577	tetrahydromethanopterin S-methyltransferase subunit A [EC:2.1.1.86]	5.75199e-05	6.01481e-05	6.37336e-05	4.74932e-05	3.97115e-05	5.07623e-05	0.000115278	0.000100337	0.000110142	0.000127345	0.000120979	0.000139778	0.000116256	6.59419e-05	4.04596e-05	8.8989e-05	5.13105e-05	0.000130195	7.05791e-05	0.000150142	5.69921e-05	0.000140244	9.57599e-05	0.000120996	0.000169132	0.000163494	0.000176485	0.00026907	0.000338809	0.000377474	0.000145024	0.000188038	0.000190956	0.000360572	0.00015581	0.000133965
K00578	tetrahydromethanopterin S-methyltransferase subunit B [EC:2.1.1.86]	1.12492e-05	1.18947e-05	1.25344e-05	9.54051e-06	7.80635e-06	1.00357e-05	2.2508e-05	1.96745e-05	2.15997e-05	2.47824e-05	2.35846e-05	2.72446e-05	2.26931e-05	1.29436e-05	7.90675e-06	1.73794e-05	1.0356e-05	2.54141e-05	1.38164e-05	2.93979e-05	1.11914e-05	2.78711e-05	1.91335e-05	2.41355e-05	3.31348e-05	3.20831e-05	3.44743e-05	5.24043e-05	6.6132e-05	7.37095e-05	2.84019e-05	3.68158e-05	3.74238e-05	7.04871e-05	3.05745e-05	2.6229e-05
K00579	tetrahydromethanopterin S-methyltransferase subunit C [EC:2.1.1.86]	3.48542e-05	3.57011e-05	3.81825e-05	2.74683e-05	2.35713e-05	2.9983e-05	6.99857e-05	6.05796e-05	6.65248e-05	7.67668e-05	7.32523e-05	8.43075e-05	7.06566e-05	3.97148e-05	2.45056e-05	5.40496e-05	2.98355e-05	7.91287e-05	4.26415e-05	9.08623e-05	3.42654e-05	8.1857e-05	5.56e-05	7.06316e-05	0.000102308	9.86829e-05	0.000107112	0.000162892	0.000205477	0.000229007	8.76954e-05	0.000113778	0.000115381	0.000218705	9.39124e-05	8.09182e-05
K00580	tetrahydromethanopterin S-methyltransferase subunit D [EC:2.1.1.86]	2.80219e-05	2.87725e-05	3.07571e-05	2.21673e-05	1.896e-05	2.41091e-05	5.62726e-05	4.87701e-05	5.35635e-05	6.16999e-05	5.8957e-05	6.78807e-05	5.68331e-05	3.15954e-05	1.97259e-05	4.34346e-05	2.42712e-05	6.3606e-05	3.42909e-05	7.30808e-05	2.75761e-05	6.34593e-05	4.28714e-05	5.50005e-05	8.23135e-05	7.94453e-05	8.60769e-05	0.000130955	0.000165163	0.000184112	7.01899e-05	9.11959e-05	9.24396e-05	0.000175805	7.55686e-05	6.50579e-05
K00581	tetrahydromethanopterin S-methyltransferase subunit E [EC:2.1.1.86]	3.63835e-05	3.71969e-05	3.98774e-05	2.84825e-05	2.45113e-05	3.10932e-05	7.30406e-05	6.33111e-05	6.95224e-05	7.98261e-05	7.64815e-05	8.80601e-05	7.37511e-05	4.05755e-05	2.55918e-05	5.64241e-05	3.14201e-05	8.25944e-05	4.44986e-05	9.48996e-05	3.57575e-05	7.87955e-05	5.28542e-05	6.85688e-05	0.000106888	0.000103145	0.000111788	0.000170058	0.00021449	0.000239094	9.0739e-05	0.000118063	0.000119574	0.000228338	9.80471e-05	8.44068e-05
K00582	tetrahydromethanopterin S-methyltransferase subunit F [EC:2.1.1.86]	8.38813e-06	8.43564e-06	9.12237e-06	6.35695e-06	5.58559e-06	7.04999e-06	1.68804e-05	1.45686e-05	1.60035e-05	1.84012e-05	1.76871e-05	2.03305e-05	1.70414e-05	9.31672e-06	5.90248e-06	1.30316e-05	7.02662e-06	1.90848e-05	1.02394e-05	2.18604e-05	8.19592e-06	1.76249e-05	1.17742e-05	1.5353e-05	2.46175e-05	2.37189e-05	2.58042e-05	3.92869e-05	4.95276e-05	5.52213e-05	2.08934e-05	2.71962e-05	2.75167e-05	5.26859e-05	2.25162e-05	1.94119e-05
K00583	tetrahydromethanopterin S-methyltransferase subunit G [EC:2.1.1.86]	1.34582e-06	1.64651e-06	1.62137e-06	1.54783e-06	1.05654e-06	1.4245e-06	2.59246e-06	2.40009e-06	2.61793e-06	2.84364e-06	2.67003e-06	3.15521e-06	2.65022e-06	1.68424e-06	9.43615e-07	2.0409e-06	1.6415e-06	2.968e-06	1.68172e-06	3.55509e-06	1.41721e-06	4.65921e-06	3.3527e-06	4.03686e-06	4.01447e-06	3.95329e-06	4.06555e-06	6.10128e-06	7.75743e-06	8.61472e-06	3.51188e-06	4.50893e-06	4.64595e-06	8.36756e-06	3.81108e-06	3.20892e-06
K00584	tetrahydromethanopterin S-methyltransferase subunit H [EC:2.1.1.86]	6.39181e-05	6.49421e-05	6.74479e-05	6.60114e-05	5.73171e-05	6.71668e-05	0.000122545	0.000113352	0.000119855	0.000175439	0.000180368	0.000196525	0.000114976	6.66938e-05	4.70102e-05	9.7738e-05	5.21908e-05	0.000144819	7.0196e-05	0.000148661	5.67982e-05	0.000146545	0.000102764	0.000126848	0.000167883	0.000161945	0.000174893	0.00027008	0.000337939	0.000375051	0.000144551	0.000186749	0.00019013	0.000356813	0.00015477	0.000134615
K00586	diphthine synthase [EC:2.1.1.98]	7.51167e-05	8.7225e-05	0.000101332	3.21682e-05	2.69365e-05	3.46489e-05	0.000123109	0.000116712	0.000118727	0.000186062	0.000177143	0.000190034	0.000182437	0.000170963	7.04499e-05	0.000109908	0.000107958	0.0001238	4.17513e-05	8.8681e-05	3.32073e-05	8.02891e-05	5.43408e-05	6.86854e-05	9.59813e-05	9.31365e-05	9.97598e-05	0.000156768	0.000196611	0.000215586	0.000107674	0.000230865	0.000167786	0.000297555	8.78335e-05	7.55713e-05
K00587	protein-S-isoprenylcysteine O-methyltransferase [EC:2.1.1.100]	2.70035e-06	2.67681e-06	2.90286e-06	1.94944e-06	1.74975e-06	2.19044e-06	5.41197e-06	4.6394e-06	5.10575e-06	5.85565e-06	5.71236e-06	6.51362e-06	6.21319e-06	2.81544e-06	2.35795e-06	4.14534e-06	2.24941e-06	6.43551e-06	3.25354e-06	6.95185e-06	2.59914e-06	4.41856e-06	2.80274e-06	3.93448e-06	7.83324e-06	7.54771e-06	8.20506e-06	1.25147e-05	1.57629e-05	1.75875e-05	6.49556e-06	8.51747e-06	8.58662e-06	1.67557e-05	7.14786e-06	6.17221e-06
K00588	caffeoyl-CoA O-methyltransferase [EC:2.1.1.104]	5.98947e-05	5.89516e-05	5.74653e-05	5.61093e-05	5.84166e-05	5.77777e-05	3.62611e-05	3.64466e-05	3.41585e-05	2.45969e-05	2.19287e-05	2.43796e-05	3.66531e-05	4.77191e-05	4.45098e-05	5.59077e-05	6.03354e-05	5.06436e-05	5.76147e-05	4.97867e-05	5.5472e-05	4.5249e-05	5.78627e-05	5.27438e-05	2.95284e-05	2.73611e-05	3.26378e-05	2.47185e-05	1.65242e-05	1.40478e-05	4.29257e-05	3.3599e-05	3.60475e-05	3.22034e-05	4.01153e-05	5.05224e-05
K00590	site-specific DNA-methyltransferase (cytosine-N4-specific) [EC:2.1.1.113]	3.13803e-05	3.22887e-05	3.27688e-05	3.2244e-05	3.28732e-05	3.39921e-05	3.95271e-05	3.91179e-05	3.78962e-05	4.77662e-05	5.00783e-05	5.03581e-05	3.99429e-05	3.67848e-05	2.52127e-05	3.66173e-05	3.39102e-05	4.3927e-05	3.41823e-05	4.29587e-05	3.13081e-05	5.14525e-05	4.0974e-05	4.63864e-05	4.0731e-05	3.93424e-05	4.37115e-05	8.07214e-05	8.8462e-05	9.3465e-05	4.08047e-05	4.90384e-05	4.66106e-05	7.28505e-05	4.06341e-05	4.07327e-05
K00594	xylitol oxidase [EC:1.1.3.41]	3.36258e-08	5.30728e-09	5.68441e-08	3.38645e-08	0	5.86742e-10	9.56269e-09	6.11504e-09	4.60459e-08	0	1.75862e-08	4.82374e-09	2.49966e-07	4.20607e-09	6.39798e-06	0	7.833e-07	1.22733e-07	4.06103e-10	1.53124e-08	0	0	0	0	0	0	0	0	0	2.90909e-08	6.72206e-10	8.4054e-10	8.54641e-08	1.30144e-08	0	4.51575e-09
K00595	precorrin-6Y C5,15-methyltransferase / precorrin-8W decarboxylase [EC:2.1.1.132 1.-.-.-]	0.000131058	0.000125404	0.000130066	0.000136222	0.0001312	0.000129562	0.000165348	0.000166788	0.000174071	0.000122283	0.000129511	0.000122503	0.00011493	8.84925e-05	0.000144953	0.000102295	9.68064e-05	9.26526e-05	0.000128037	0.00012816	0.000137098	0.000146073	0.000114997	0.000130423	0.000221142	0.000230541	0.00020225	0.000147241	0.000152393	0.000155291	0.00013609	0.000123764	0.000142524	9.43344e-05	0.00018423	0.000148758
K00596	2,2-dialkylglycine decarboxylase (pyruvate) [EC:4.1.1.64]	1.38274e-05	1.33119e-05	1.37749e-05	1.82708e-05	1.71032e-05	1.54697e-05	4.06328e-05	3.30278e-05	3.89782e-05	1.73142e-05	1.54037e-05	1.41178e-05	4.36709e-05	2.06221e-05	4.04675e-05	1.76875e-05	1.615e-05	1.14891e-05	1.74034e-05	1.98243e-05	2.00846e-05	1.04121e-05	8.91126e-06	9.07854e-06	6.52414e-05	6.88742e-05	5.71141e-05	1.03496e-05	1.25123e-05	9.33759e-06	4.03344e-05	3.73212e-05	4.38945e-05	2.02067e-05	4.10069e-05	3.01018e-05
K00598	trans-aconitate 2-methyltransferase [EC:2.1.1.144]	1.52183e-05	1.40321e-05	1.46517e-05	2.04002e-05	1.87184e-05	1.93812e-05	2.16557e-05	2.51189e-05	2.36316e-05	4.94825e-05	5.67067e-05	5.61251e-05	1.59226e-05	8.01604e-06	2.28463e-05	1.65927e-05	1.00881e-05	2.55145e-05	1.2122e-05	2.01877e-05	1.16017e-05	2.28953e-05	1.5437e-05	1.92802e-05	2.24183e-05	2.20655e-05	2.2788e-05	4.25976e-05	4.94692e-05	5.22625e-05	1.54552e-05	1.97787e-05	2.06179e-05	3.69275e-05	2.12321e-05	1.83458e-05
K00599	[EC:2.1.1.-]	0.00115366	0.00114303	0.00113034	0.00109818	0.00112337	0.00112449	0.00100491	0.00100685	0.000988232	0.000946707	0.000930754	0.000953299	0.000989941	0.00110094	0.00114724	0.00113091	0.00116711	0.00111559	0.00116325	0.0010922	0.00114325	0.00105129	0.00117209	0.00111626	0.000969993	0.000950214	0.000988471	0.000855969	0.000777182	0.00074704	0.00105434	0.0010073	0.00101503	0.000964021	0.00100706	0.00109176
K00600	glycine hydroxymethyltransferase [EC:2.1.2.1]	0.000854146	0.000870166	0.000852013	0.000871512	0.000866734	0.000874077	0.000802079	0.000801795	0.000801465	0.000828556	0.000827319	0.000821826	0.000848815	0.000911276	0.000822122	0.000893245	0.00089899	0.000914171	0.000864531	0.000862931	0.00085023	0.000845105	0.000890403	0.000869343	0.000723536	0.000710792	0.000749738	0.000795512	0.000787209	0.000798394	0.000829957	0.000850484	0.000822801	0.000916915	0.000793831	0.000837329
K00602	phosphoribosylaminoimidazolecarboxamide formyltransferase / IMP cyclohydrolase [EC:2.1.2.3 3.5.4.10]	0.000791815	0.00078298	0.000761538	0.000825312	0.00082908	0.000829652	0.000771347	0.000757476	0.000767432	0.000677301	0.000669319	0.000676089	0.000733177	0.00073776	0.000779991	0.000808595	0.000784483	0.000820831	0.00084157	0.000845136	0.000833815	0.000829225	0.000856201	0.00084312	0.000809466	0.0008036	0.000820789	0.000795582	0.000796472	0.000813079	0.000835026	0.000730214	0.000791925	0.000804125	0.000837245	0.000852873
K00603	glutamate formiminotransferase [EC:2.1.2.5]	0.000183788	0.000188434	0.00017697	0.000183711	0.000187319	0.000188439	0.000123493	0.00012506	0.000120194	0.000103223	0.000107076	9.68473e-05	0.000120977	0.000158579	0.000129352	0.000175072	0.000188393	0.000165918	0.000191769	0.000165679	0.000184853	0.000172973	0.00020175	0.000187952	0.000101435	9.51519e-05	0.000112139	0.000117911	9.19899e-05	8.45768e-05	0.000141917	0.000110401	0.00011877	0.000104632	0.00013056	0.000163613
K00604	methionyl-tRNA formyltransferase [EC:2.1.2.9]	0.000278638	0.0002762	0.000273464	0.000317303	0.000313448	0.000307513	0.000245553	0.000258112	0.000252025	0.000260676	0.000271501	0.000263152	0.000211652	0.000219943	0.000273773	0.000256418	0.000267065	0.0002385	0.000263243	0.000248127	0.000268212	0.000299492	0.000279024	0.000287584	0.000235352	0.000238437	0.000236012	0.000288372	0.000280667	0.0002812	0.000238543	0.000191894	0.000213277	0.000171774	0.000258314	0.000259412
K00605	aminomethyltransferase [EC:2.1.2.10]	0.000488257	0.000494775	0.000500294	0.000445037	0.000451046	0.000449145	0.000407661	0.000434378	0.000414299	0.000544046	0.00056263	0.000552979	0.000465529	0.00055515	0.000448922	0.000494923	0.000524608	0.000487079	0.000425775	0.000384645	0.000424183	0.000378593	0.000426214	0.000403666	0.000251611	0.00024445	0.000267954	0.00029947	0.000262171	0.000246733	0.000363421	0.000435842	0.000359161	0.000370633	0.000323195	0.000366024
K00606	3-methyl-2-oxobutanoate hydroxymethyltransferase [EC:2.1.2.11]	0.000396694	0.000407195	0.000407657	0.000398444	0.000396383	0.000393309	0.000402235	0.000401339	0.000401462	0.000416411	0.000417432	0.0004069	0.000446858	0.000469354	0.000412738	0.000410228	0.000433964	0.000385001	0.000368321	0.000341795	0.000370428	0.000340671	0.000362718	0.000349618	0.00035438	0.000357457	0.000348793	0.000284792	0.000259816	0.000248806	0.000380193	0.000426385	0.000384798	0.000343443	0.000349127	0.000356267
K00608	aspartate carbamoyltransferase [EC:2.1.3.2]	1.86562e-07	0	4.11231e-07	9.35747e-07	6.85866e-07	8.20625e-07	6.66725e-06	6.67686e-06	6.16049e-06	1.41266e-06	8.9195e-07	8.3904e-07	9.93701e-06	9.36354e-07	0	0	0	0	0	1.07994e-07	0	2.78015e-07	3.37153e-07	3.1058e-07	6.0414e-07	6.82642e-07	1.14101e-06	1.14946e-07	8.61985e-07	0	2.16887e-07	4.09157e-07	2.00442e-07	2.06338e-07	1.39488e-07	2.07149e-07
K00609	aspartate carbamoyltransferase catalytic subunit [EC:2.1.3.2]	0.000428395	0.000436254	0.00044315	0.000420657	0.000415258	0.000415078	0.000453788	0.000448381	0.000452366	0.000490178	0.00048525	0.000490949	0.000498424	0.00049232	0.000442586	0.000457853	0.000467372	0.000448553	0.000392747	0.000415587	0.000389394	0.000423308	0.000407357	0.00041478	0.000428834	0.00043029	0.000428253	0.000456222	0.000481915	0.00050124	0.000454792	0.000514921	0.000476425	0.000535257	0.000433646	0.000423655
K00610	aspartate carbamoyltransferase regulatory subunit	5.50337e-05	5.99069e-05	6.57261e-05	3.68886e-05	3.45757e-05	3.85776e-05	7.85133e-05	7.74636e-05	7.671e-05	0.000122139	0.000121577	0.000128226	0.000103778	9.89798e-05	5.11858e-05	7.5072e-05	6.95347e-05	8.65802e-05	3.9288e-05	6.35397e-05	3.40721e-05	5.41517e-05	4.46595e-05	5.06162e-05	6.2917e-05	6.05806e-05	6.58635e-05	9.72637e-05	0.000116887	0.00012675	7.07564e-05	0.000129641	9.9988e-05	0.0001693	6.05604e-05	5.66287e-05
K00611	ornithine carbamoyltransferase [EC:2.1.3.3]	0.000437062	0.000447028	0.00045154	0.000443814	0.000435307	0.000436517	0.000438488	0.000436832	0.000439177	0.000496181	0.000492801	0.000496325	0.000473529	0.000472316	0.00042268	0.000462216	0.000460982	0.000463794	0.000412529	0.000448921	0.000407285	0.000439982	0.00042509	0.000434249	0.000402175	0.000399237	0.000412348	0.000496973	0.000535263	0.000555453	0.000441496	0.000495591	0.000463957	0.000567992	0.000433045	0.000430538
K00612	carbamoyltransferase [EC:2.1.3.-]	0.000111992	0.000129227	0.000159069	2.63367e-05	2.38002e-05	2.69623e-05	0.000125024	0.000132368	0.00012787	0.000246076	0.000231751	0.000236047	0.000228153	0.000247683	0.000104779	0.000121159	0.000150085	0.000105101	4.31343e-05	5.38109e-05	4.92667e-05	1.34423e-05	9.86595e-06	1.23423e-05	2.56106e-05	2.75437e-05	2.40884e-05	4.84642e-05	4.97313e-05	3.15772e-05	5.14953e-05	0.000230637	0.000116922	0.000179074	2.78361e-05	1.90492e-05
K00613	glycine amidinotransferase [EC:2.1.4.1]	3.38656e-08	6.23354e-09	3.29224e-08	1.17116e-08	0	6.89144e-10	1.12316e-08	5.69007e-09	4.32398e-08	0	3.70019e-08	1.12703e-08	2.93591e-07	4.94014e-09	4.59017e-06	0	7.28864e-07	1.42266e-07	2.36392e-09	4.48633e-09	0	0	0	0	0	0	0	2.81535e-09	0	7.06087e-09	4.87857e-09	4.89277e-09	2.52657e-08	3.15882e-09	7.29172e-09	1.56717e-08
K00614	[EC:2.1.-.-]	0.000112311	0.000110905	0.000103386	0.000117122	0.000121935	0.00012143	8.70869e-05	8.71298e-05	8.4572e-05	6.4833e-05	5.97742e-05	6.21703e-05	9.10772e-05	0.000117557	0.000105898	0.000118642	0.000122884	0.000120372	0.000126382	0.000109152	0.000124029	0.000107994	0.000130938	0.00011919	6.89574e-05	6.57213e-05	7.62846e-05	7.00788e-05	5.30955e-05	4.71936e-05	0.000100727	7.76653e-05	8.43649e-05	6.78357e-05	8.90589e-05	0.000108638
K00615	transketolase [EC:2.2.1.1]	0.00112403	0.00111541	0.00109912	0.00120258	0.00119416	0.00118644	0.00102152	0.00106157	0.00104975	0.00112307	0.00117889	0.00114495	0.000933168	0.00100448	0.00106003	0.0010823	0.00106056	0.00108059	0.00109248	0.0010367	0.00110159	0.00102441	0.00107706	0.00105361	0.00094511	0.000943249	0.0009486	0.000905588	0.000843311	0.000839195	0.000984501	0.00089335	0.000918654	0.000844518	0.00101808	0.00103962
K00616	transaldolase [EC:2.2.1.2]	0.000254901	0.000252634	0.000249458	0.000262335	0.00026395	0.000261103	0.000227951	0.000225929	0.000226007	0.00017359	0.00016795	0.000166683	0.000218392	0.000216457	0.000276607	0.000241305	0.000257172	0.000221565	0.000259522	0.000245102	0.000260939	0.000241137	0.000251613	0.000247322	0.000238026	0.000238903	0.000237648	0.000215216	0.000205599	0.000202317	0.000242065	0.000199107	0.00022081	0.000180086	0.00024723	0.000252763
K00619	amino-acid N-acetyltransferase [EC:2.3.1.1]	2.88317e-05	2.82481e-05	3.14251e-05	3.36356e-05	3.08135e-05	3.16164e-05	4.52786e-05	4.8187e-05	4.86066e-05	3.79445e-05	3.85222e-05	3.66966e-05	2.06795e-05	1.34321e-05	2.88929e-05	1.3551e-05	1.27143e-05	1.04826e-05	2.88924e-05	2.9969e-05	3.26582e-05	6.26515e-05	3.77988e-05	4.76778e-05	6.85089e-05	7.2163e-05	6.16809e-05	6.97264e-05	7.35712e-05	8.05561e-05	4.22003e-05	3.34395e-05	3.96021e-05	2.3237e-05	5.17435e-05	3.56951e-05
K00620	glutamate N-acetyltransferase / amino-acid N-acetyltransferase [EC:2.3.1.35 2.3.1.1]	0.000454176	0.00044758	0.000443787	0.000467856	0.000464097	0.000464535	0.000458506	0.00044711	0.000456718	0.000429463	0.000427785	0.000440022	0.000432097	0.000402335	0.000440082	0.000466384	0.000448537	0.000470334	0.000457018	0.00049468	0.000450685	0.000496777	0.000476383	0.000488881	0.000501312	0.000499731	0.000505728	0.000551981	0.000590645	0.000620328	0.00050222	0.000454252	0.000492043	0.000556108	0.000513267	0.000504047
K00622	arylamine N-acetyltransferase [EC:2.3.1.5]	3.10866e-08	0	3.71525e-08	2.05984e-08	6.09512e-09	3.14701e-08	0	8.24116e-09	5.988e-08	0	0	0	0	0	4.03598e-06	0	1.05564e-06	1.04176e-08	1.85747e-10	1.51845e-09	0	0	0	0	0	0	0	0	0	2.94925e-09	0	3.84454e-10	8.83162e-09	1.3194e-09	0	3.25463e-10
K00624	carnitine O-acetyltransferase [EC:2.3.1.7]	1.1693e-07	2.85492e-06	1.08303e-06	1.05708e-05	8.25253e-06	8.19044e-06	0	5.90188e-09	7.59267e-07	3.307e-06	6.14903e-06	1.6542e-06	0	0	4.72819e-06	0	7.55997e-07	7.46053e-09	1.35419e-06	1.10394e-06	1.31682e-06	3.73057e-06	3.30472e-06	3.21672e-06	1.22624e-07	2.07837e-07	0	6.84304e-07	1.98919e-07	4.41179e-07	0	0	4.42447e-08	6.90445e-09	0	8.78813e-08
K00625	phosphate acetyltransferase [EC:2.3.1.8]	0.000378485	0.000377073	0.000366415	0.000426223	0.000423739	0.000414494	0.000349418	0.000345362	0.000347996	0.000274377	0.00027193	0.000261735	0.000331519	0.00033629	0.000378084	0.000370226	0.000395068	0.000323856	0.000367348	0.000336102	0.000371802	0.000391184	0.000388277	0.000386222	0.000357582	0.000363268	0.000353112	0.000312902	0.000289337	0.000279375	0.000356406	0.000286376	0.00032303	0.000228956	0.000369165	0.000377421
K00626	acetyl-CoA C-acetyltransferase [EC:2.3.1.9]	0.00102225	0.00104362	0.000996791	0.0015035	0.00148529	0.00140607	0.00114654	0.00105688	0.00110273	0.00115136	0.00109918	0.00112973	0.00155082	0.00146266	0.00176299	0.00135643	0.00149613	0.00128824	0.00099188	0.000976091	0.00100216	0.00121893	0.0012075	0.00118335	0.000912509	0.000935172	0.000947953	0.00113173	0.00108211	0.00100254	0.0011987	0.00114205	0.00117203	0.00101334	0.00104539	0.00112709
K00627	pyruvate dehydrogenase E2 component (dihydrolipoamide acetyltransferase) [EC:2.3.1.12]	0.000590302	0.00057803	0.000589853	0.000615677	0.00060628	0.000602944	0.000672752	0.00069359	0.000686885	0.000859209	0.00093528	0.000901593	0.000628557	0.000484544	0.0007323	0.000534609	0.000489106	0.000592068	0.00056776	0.000578478	0.000582752	0.00056725	0.000522229	0.000545522	0.000772514	0.000785052	0.000732139	0.00066197	0.000666904	0.000634933	0.000594245	0.000610239	0.0006477	0.000526306	0.000643422	0.000594534
K00630	glycerol-3-phosphate O-acyltransferase [EC:2.3.1.15]	0	0	0	0	0	0	0	0	0	0	0	0	0	0	4.69766e-09	0	0	0	4.64775e-11	0	0	0	0	0	0	0	0	0	0	0	0	9.61979e-11	9.42528e-11	0	0	8.14373e-11
K00631	glycerol-3-phosphate O-acyltransferase [EC:2.3.1.15]	3.18255e-05	3.11339e-05	3.92027e-05	5.82217e-06	6.96643e-06	6.74085e-06	0.000107749	8.63651e-05	0.000100481	5.90192e-05	5.31161e-05	4.90512e-05	0.000116968	3.31705e-05	0.000111505	2.19745e-05	1.67039e-05	1.4423e-05	5.81957e-05	7.00318e-05	6.61499e-05	7.03553e-06	5.5653e-06	6.08448e-06	0.000204802	0.000213646	0.000178753	5.5972e-05	6.34152e-05	4.62526e-05	0.000116335	0.000115291	0.000133911	6.19374e-05	0.000109706	7.5957e-05
K00632	acetyl-CoA acyltransferase [EC:2.3.1.16]	0.0003095	0.00031033	0.000306806	0.000353682	0.000361573	0.000351054	0.000298189	0.00028366	0.000285456	0.000281329	0.000265983	0.000271769	0.000356541	0.000326117	0.000446046	0.000316162	0.000342136	0.000318826	0.000354107	0.00032968	0.000359909	0.000318414	0.000341888	0.000327369	0.000304661	0.000306106	0.000307502	0.00033017	0.000292598	0.000249469	0.000333529	0.000283639	0.000314362	0.000210024	0.000294143	0.000317649
K00633	galactoside O-acetyltransferase [EC:2.3.1.18]	2.2886e-05	2.32345e-05	2.44912e-05	2.22113e-05	2.16472e-05	2.17516e-05	1.92774e-05	2.16731e-05	2.07755e-05	2.09369e-05	2.00111e-05	2.01236e-05	1.45642e-05	1.90741e-05	1.70521e-05	1.76238e-05	1.84884e-05	1.60611e-05	2.03141e-05	1.91144e-05	2.13734e-05	2.53199e-05	2.16131e-05	2.33162e-05	1.63983e-05	1.67057e-05	1.63603e-05	2.06445e-05	1.92896e-05	1.86656e-05	1.18933e-05	1.53888e-05	1.29033e-05	1.45588e-05	1.88309e-05	1.72778e-05
K00634	phosphate butyryltransferase [EC:2.3.1.19]	0.00072031	0.000718877	0.000680887	0.000696176	0.000718239	0.000727023	0.000522637	0.00054036	0.000515572	0.000444735	0.000438578	0.000431267	0.00049235	0.000652951	0.000549847	0.000698287	0.000724197	0.000694834	0.00078132	0.000680715	0.000764164	0.000676055	0.000794095	0.000736437	0.000433518	0.000411386	0.000474702	0.000484505	0.000385265	0.000351538	0.000578642	0.000451308	0.000487602	0.000416326	0.000543693	0.000658134
K00635	diacylglycerol O-acyltransferase [EC:2.3.1.20]	4.85615e-07	6.09738e-09	5.94082e-07	2.43359e-07	0	6.74091e-10	1.09863e-08	1.25522e-07	9.13895e-07	0	2.02042e-08	5.54186e-09	2.87179e-07	4.83224e-09	6.53596e-05	0	1.60787e-05	2.90795e-07	7.87976e-09	3.63819e-08	0	0	0	0	0	0	0	0	0	7.0664e-08	0	1.63093e-08	2.18559e-07	3.16129e-08	0	1.75607e-08
K00638	chloramphenicol O-acetyltransferase [EC:2.3.1.28]	0.00032022	0.000313088	0.000304513	0.000303603	0.000312122	0.000316012	0.000267865	0.000283036	0.000271534	0.000262455	0.000264369	0.000268	0.000237546	0.000299532	0.000252954	0.000309757	0.000299167	0.000323642	0.000340194	0.000307441	0.000337804	0.000277643	0.000328652	0.000305516	0.000232137	0.00022465	0.000242271	0.000198528	0.00016006	0.000147497	0.000259444	0.000235192	0.000236714	0.000223874	0.000264926	0.000293285
K00639	glycine C-acetyltransferase [EC:2.3.1.29]	0.000237756	0.000253228	0.000272042	0.000191843	0.000185615	0.00018785	0.000259553	0.00026238	0.000261677	0.000288657	0.000287179	0.000276145	0.00029443	0.000302667	0.000219403	0.000217836	0.000248656	0.000187155	0.000177073	0.00016986	0.000179945	0.000189992	0.000166467	0.000178639	0.000234541	0.000240511	0.000219154	0.000180531	0.000174759	0.000168718	0.000198041	0.000321566	0.000249788	0.000245433	0.000199138	0.000180862
K00640	serine O-acetyltransferase [EC:2.3.1.30]	0.000256423	0.000258029	0.000270203	0.000236568	0.000230727	0.000234679	0.000296081	0.000296016	0.000300845	0.000327954	0.000330081	0.000328337	0.000283604	0.000250155	0.000236924	0.000246667	0.000228976	0.000255211	0.00025152	0.000287415	0.000255145	0.000276697	0.000238229	0.000258255	0.000324748	0.00032759	0.000318782	0.000357792	0.000394481	0.000406682	0.000278604	0.000313492	0.000303766	0.000360067	0.00030033	0.00026948
K00641	homoserine O-acetyltransferase [EC:2.3.1.31]	0.000146234	0.000150859	0.000166732	0.000128202	0.00011466	0.000122994	0.000148555	0.000151455	0.000154453	0.000212775	0.000216662	0.000219425	0.000125253	7.18533e-05	9.85873e-05	0.000120841	0.000108521	0.000137797	0.00013233	0.000207374	0.000129319	0.000233668	0.000145923	0.000193437	0.000200247	0.000199702	0.000205008	0.000405901	0.000484704	0.000511142	0.00014753	0.000183817	0.000192098	0.000332505	0.000202474	0.000171111
K00643	5-aminolevulinate synthase [EC:2.3.1.37]	4.10334e-05	4.12141e-05	4.02114e-05	3.68523e-05	3.75798e-05	3.82897e-05	2.89398e-05	2.96488e-05	2.96697e-05	2.68713e-05	2.57228e-05	2.37031e-05	2.74268e-05	3.49058e-05	3.35027e-05	3.65718e-05	3.63673e-05	3.733e-05	4.85173e-05	4.48773e-05	4.94504e-05	3.24182e-05	4.11698e-05	3.7174e-05	2.57896e-05	2.47457e-05	2.78048e-05	2.5414e-05	2.17106e-05	1.86405e-05	3.35985e-05	2.46908e-05	2.70806e-05	2.3285e-05	3.1972e-05	3.57828e-05
K00645	[acyl-carrier-protein] S-malonyltransferase [EC:2.3.1.39]	0.000374991	0.000373135	0.000362921	0.000432148	0.000432023	0.00042337	0.000339617	0.000349472	0.000342424	0.000326787	0.000334768	0.000321785	0.000312794	0.000327145	0.000399204	0.000360174	0.000383395	0.000336811	0.000377175	0.000344548	0.000382016	0.000410061	0.000399181	0.000400097	0.000328661	0.000332176	0.000330699	0.000377942	0.000354942	0.000346353	0.000342039	0.000272063	0.000303651	0.000221427	0.000351883	0.000364385
K00646	malonyl-ACP decarboxylase	1.0924e-07	1.07711e-07	1.01011e-07	3.40156e-07	3.34869e-07	2.88094e-07	9.18337e-08	1.10616e-07	5.10927e-08	2.16958e-08	4.1966e-08	5.94873e-08	6.11631e-07	9.67553e-09	1.07201e-06	6.43741e-08	1.09718e-07	2.64998e-07	1.19404e-07	1.03942e-07	1.32056e-07	7.79587e-08	7.31432e-08	8.12289e-08	9.37615e-09	6.64088e-09	1.11e-08	4.77187e-09	3.76629e-09	3.8598e-09	1.76094e-08	6.43616e-08	3.73366e-08	9.53759e-08	3.77685e-08	4.04056e-08
K00647	3-oxoacyl-[acyl-carrier-protein] synthase I [EC:2.3.1.41]	0.00017082	0.000168429	0.000173455	0.000149935	0.000149638	0.000150184	0.000216925	0.000205574	0.000214871	0.000153228	0.000147817	0.000140393	0.000198737	0.0001391	0.00019049	0.000142697	0.000139256	0.000126169	0.000188498	0.000186913	0.000198215	0.00016992	0.000150815	0.000158694	0.000302577	0.000312392	0.00028006	0.000196738	0.000199244	0.000184082	0.000209687	0.000189096	0.000216787	0.000131812	0.000230415	0.000200334
K00648	3-oxoacyl-[acyl-carrier-protein] synthase III [EC:2.3.1.180]	0.000427966	0.000426203	0.000422836	0.00049468	0.000490082	0.000480771	0.000423899	0.000435358	0.000428587	0.000398672	0.00041588	0.00039584	0.000363595	0.000343973	0.000434744	0.000383987	0.000399824	0.00035447	0.000426314	0.000397224	0.000436207	0.000489987	0.000443641	0.000461325	0.000465746	0.000475731	0.000452278	0.000489796	0.000470341	0.000460228	0.000405009	0.000338588	0.000381549	0.000263906	0.000443251	0.000429499
K00651	homoserine O-succinyltransferase [EC:2.3.1.46]	0.000195968	0.000189699	0.000179136	0.000195506	0.000204115	0.000205029	0.000152103	0.000160557	0.000150858	0.000146014	0.000145842	0.00014962	0.000139121	0.000182334	0.000162033	0.000196305	0.000189786	0.000207933	0.000217117	0.000188223	0.000213079	0.00016366	0.000213356	0.00019004	0.000119415	0.000112198	0.000130335	9.77345e-05	6.5668e-05	5.45156e-05	0.00016188	0.000126585	0.000135593	0.000114172	0.000148778	0.000180439
K00652	8-amino-7-oxononanoate synthase [EC:2.3.1.47]	0.000132564	0.000139579	0.000156963	0.000120663	0.000110274	0.000113642	0.000211613	0.000213403	0.000217834	0.000213266	0.000216618	0.000204262	0.00018135	0.000124011	0.000157437	9.51032e-05	0.00010126	7.97687e-05	0.000116556	0.000134913	0.000127015	0.000173573	9.88273e-05	0.000133396	0.000285378	0.000298405	0.000258297	0.000259839	0.000284477	0.000289842	0.000165235	0.000216739	0.000203831	0.00017742	0.000203154	0.000147591
K00655	1-acyl-sn-glycerol-3-phosphate acyltransferase [EC:2.3.1.51]	0.000328462	0.000324018	0.000323769	0.000326208	0.000329696	0.000327209	0.000341216	0.000336156	0.000337535	0.000271442	0.000270413	0.000266694	0.000310517	0.000272799	0.000376306	0.000295929	0.000309194	0.000273555	0.000344721	0.000322344	0.000350594	0.000319203	0.000319687	0.000317858	0.000410337	0.000416813	0.000392538	0.000315067	0.000290982	0.000279672	0.000356227	0.000297327	0.000334623	0.000226445	0.000358492	0.000345806
K00656	formate C-acetyltransferase [EC:2.3.1.54]	0.00236809	0.00231431	0.00219719	0.00226441	0.00235876	0.00237637	0.0018071	0.00187633	0.00181001	0.00153316	0.00150934	0.00153965	0.00166502	0.00224253	0.00197787	0.00234621	0.00231438	0.00244488	0.00263013	0.00229826	0.0025989	0.00197511	0.00253225	0.00227401	0.00148524	0.00141172	0.00160165	0.00116829	0.000777656	0.00064915	0.00193737	0.00154978	0.00164618	0.00140195	0.00185713	0.00218584
K00657	diamine N-acetyltransferase [EC:2.3.1.57]	0.000134111	0.000133468	0.000127089	0.000136117	0.000140946	0.000141323	0.000100278	0.000101315	9.68576e-05	7.39622e-05	6.75475e-05	7.12143e-05	0.000104085	0.000130508	0.000116286	0.00013281	0.000135108	0.00013748	0.000150135	0.000132388	0.000146828	0.00011924	0.000150239	0.000135869	8.28587e-05	7.78876e-05	9.08767e-05	7.21386e-05	5.31661e-05	4.68389e-05	0.000114954	9.54056e-05	9.95145e-05	9.00599e-05	0.000103008	0.000124475
K00658	2-oxoglutarate dehydrogenase E2 component (dihydrolipoamide succinyltransferase) [EC:2.3.1.61]	0.000276727	0.00026919	0.000292487	0.000254384	0.000240033	0.000241653	0.000375755	0.000374081	0.000391189	0.00040186	0.000428327	0.000411798	0.000341877	0.000199929	0.000434005	0.000213865	0.000191334	0.000239114	0.000258328	0.000292551	0.000276676	0.000244452	0.000190073	0.000221302	0.000504214	0.000520989	0.000459056	0.000327204	0.000355889	0.000350682	0.000307644	0.000351317	0.000368863	0.000309102	0.000383353	0.000300963
K00661	maltose O-acetyltransferase [EC:2.3.1.79]	0.000380005	0.000378579	0.000371854	0.000346736	0.000356317	0.000364045	0.000331336	0.000337297	0.000329075	0.000294575	0.000281225	0.000289676	0.000319993	0.00037863	0.000312203	0.000374455	0.000368994	0.000393607	0.000416309	0.000399623	0.000409884	0.000362877	0.000404446	0.000387117	0.000304652	0.000294468	0.000321272	0.000322738	0.000300123	0.000293048	0.000341247	0.00033374	0.000330367	0.000360116	0.000339455	0.000369105
K00662	aminoglycoside N3'-acetyltransferase [EC:2.3.1.81]	7.36934e-06	6.63728e-06	7.75433e-06	9.40685e-06	8.79917e-06	8.24105e-06	5.0489e-06	5.82768e-06	6.10259e-06	2.36193e-06	1.99996e-06	2.23551e-06	6.13064e-07	7.67464e-07	3.02156e-06	3.37574e-06	2.24253e-06	2.0064e-06	5.5335e-06	5.70298e-06	6.454e-06	3.97433e-06	3.51178e-06	4.25006e-06	5.92657e-06	6.21622e-06	5.27326e-06	4.89313e-07	4.32889e-07	3.22382e-07	6.44652e-07	4.83396e-07	7.84709e-07	1.86457e-06	6.95653e-06	4.84354e-06
K00663	aminoglycoside N6'-acetyltransferase [EC:2.3.1.82]	1.02299e-06	1.03492e-06	1.30927e-06	4.82486e-06	4.61014e-06	3.99498e-06	2.46341e-07	6.68876e-08	6.88671e-08	3.24822e-07	1.7629e-08	5.21959e-07	7.61225e-08	9.08911e-10	8.61983e-07	2.57151e-07	7.99786e-08	2.52583e-08	1.66778e-07	4.70901e-08	2.18483e-07	1.11642e-06	1.02483e-06	1.21613e-06	7.3906e-09	4.00917e-09	6.70117e-09	6.38499e-08	4.21186e-08	4.7054e-09	2.70795e-08	1.25297e-08	3.01714e-08	3.67144e-08	3.8706e-08	1.20731e-07
K00666	fatty-acyl-CoA synthase [EC:6.2.1.-]	0.000471312	0.000460275	0.000511198	0.000629526	0.000592904	0.000574238	0.000821385	0.000774462	0.000828253	0.000841154	0.000886655	0.000892142	0.000754036	0.000373357	0.00104937	0.000447348	0.000430744	0.000509515	0.000483884	0.000668064	0.000505052	0.000738065	0.00048502	0.000611159	0.00117675	0.00121258	0.00110035	0.00121263	0.00133621	0.00138116	0.000783489	0.000825954	0.000910452	0.000984414	0.000918293	0.000714773
K00672	formylmethanofuran--tetrahydromethanopterin N-formyltransferase [EC:2.3.1.101]	5.30205e-05	5.6109e-05	5.919e-05	4.47196e-05	3.66364e-05	4.69501e-05	0.000105989	9.28673e-05	0.000101953	0.000116219	0.000111152	0.000128467	0.000107519	5.89932e-05	3.75657e-05	8.18421e-05	4.96139e-05	0.00011996	6.50883e-05	0.000138606	5.27652e-05	0.000116855	7.87764e-05	0.00010243	0.000156301	0.000151475	0.000162309	0.000246811	0.000311433	0.000347192	0.000131957	0.000171808	0.000174324	0.000332048	0.000144173	0.000123517
K00673	arginine N-succinyltransferase [EC:2.3.1.109]	3.69848e-07	2.67525e-07	1.66888e-07	1.16969e-07	1.01357e-07	4.11078e-07	3.34945e-07	0	5.65409e-08	0	6.15977e-07	1.68957e-07	8.75536e-06	1.47323e-07	9.67729e-06	0	0	4.02811e-06	2.68157e-07	2.21175e-07	2.25912e-07	2.2552e-08	4.2915e-08	6.38406e-08	0	0	1.01502e-08	0	0	0	6.65718e-08	1.09785e-07	2.30614e-07	1.63381e-07	1.77549e-08	2.60544e-07
K00674	2,3,4,5-tetrahydropyridine-2-carboxylate N-succinyltransferase [EC:2.3.1.117]	0.000132962	0.000132582	0.000131304	0.00011808	0.00012117	0.000122263	8.97002e-05	9.21931e-05	8.83792e-05	8.25515e-05	7.85648e-05	7.71261e-05	9.56519e-05	0.000105152	0.000147455	0.000119556	0.000133636	0.000115836	0.000139295	0.0001291	0.000138276	0.000110153	0.000128738	0.00012102	7.61783e-05	7.23692e-05	8.35772e-05	9.50128e-05	8.51016e-05	7.43581e-05	9.57192e-05	7.77707e-05	8.4612e-05	7.93163e-05	9.59079e-05	0.000113354
K00675	N-hydroxyarylamine O-acetyltransferase [EC:2.3.1.118]	1.42926e-05	1.29312e-05	1.41238e-05	3.51157e-05	3.34789e-05	3.07877e-05	1.2231e-05	1.6709e-05	1.42814e-05	3.8859e-05	4.56699e-05	4.52835e-05	3.57901e-06	2.26719e-06	1.47658e-05	9.29547e-06	3.88428e-06	1.36781e-05	6.44939e-06	6.00151e-06	7.3554e-06	1.74477e-05	1.23718e-05	1.50943e-05	7.56368e-06	7.81413e-06	7.07696e-06	1.9179e-05	1.9116e-05	1.85642e-05	2.24581e-06	2.53432e-06	3.50361e-06	2.48836e-06	7.74449e-06	6.99464e-06
K00676	ribosomal-protein-alanine N-acetyltransferase [EC:2.3.1.128]	0.000224028	0.000221563	0.000216971	0.000248267	0.000251061	0.000248911	0.000194474	0.000194253	0.000189663	0.000230604	0.000232846	0.00024529	0.000201019	0.000227838	0.000190606	0.000241002	0.000224068	0.000259349	0.000218897	0.00022147	0.0002094	0.000215997	0.000242372	0.000231719	0.000163847	0.000155254	0.000176947	0.000190804	0.000187022	0.000189616	0.000209141	0.000213066	0.000209127	0.000257934	0.000189893	0.000215788
K00677	UDP-N-acetylglucosamine acyltransferase [EC:2.3.1.129]	7.19268e-05	7.64637e-05	8.60385e-05	6.37052e-05	5.77637e-05	6.0447e-05	0.000102455	0.000103948	0.000105594	0.000121517	0.000122889	0.000119091	9.3268e-05	6.69091e-05	5.87697e-05	5.48685e-05	5.00083e-05	5.53007e-05	6.28375e-05	8.09428e-05	6.66639e-05	9.69435e-05	5.75793e-05	7.67419e-05	0.000128237	0.000132535	0.000120127	0.000156616	0.000174921	0.000182448	8.76966e-05	0.000115271	0.000107246	0.000121391	0.0001012	7.6156e-05
K00680	[EC:2.3.1.-]	0.000838614	0.000830352	0.000814334	0.00100175	0.00101147	0.000993277	0.000806239	0.000806052	0.000792292	0.000749044	0.000736447	0.000744157	0.000770759	0.000807611	0.000912921	0.000819913	0.000837394	0.000831747	0.000899316	0.000831456	0.000899571	0.000940847	0.000957806	0.000943599	0.000811398	0.000808108	0.000820494	0.000840249	0.000781499	0.000742544	0.000810652	0.000710823	0.000761427	0.000639155	0.000799065	0.000845802
K00681	gamma-glutamyltranspeptidase [EC:2.3.2.2]	0.000361013	0.000361246	0.000347033	0.000336036	0.000346001	0.000351157	0.000257013	0.00026009	0.000256272	0.000222742	0.000210452	0.000201186	0.000290621	0.000324129	0.000344454	0.000334155	0.000339448	0.000362759	0.00042208	0.000381234	0.00042325	0.000298755	0.000378729	0.000341824	0.000221638	0.000210722	0.00024177	0.000214537	0.000171541	0.000137229	0.000286196	0.000225153	0.000244422	0.000205806	0.000272684	0.000322035
K00683	glutaminyl-peptide cyclotransferase [EC:2.3.2.5]	1.24745e-05	1.09139e-05	1.24349e-05	6.57148e-06	5.89642e-06	6.34827e-06	2.84404e-05	2.52315e-05	2.92544e-05	6.88625e-06	6.03292e-06	5.03031e-06	2.06782e-05	7.30415e-06	2.60829e-05	7.34037e-06	5.0691e-06	5.00754e-06	1.53564e-05	1.65729e-05	1.73844e-05	7.14025e-06	5.90855e-06	6.66282e-06	5.04909e-05	5.27837e-05	4.37071e-05	2.93532e-06	3.29838e-06	3.1279e-06	2.38492e-05	2.29998e-05	2.69194e-05	1.44224e-05	3.24423e-05	2.18991e-05
K00684	leucyl/phenylalanyl-tRNA--protein transferase [EC:2.3.2.6]	4.68608e-05	4.28835e-05	4.86074e-05	3.81629e-05	3.56748e-05	3.6323e-05	6.79084e-05	7.15811e-05	7.4741e-05	7.15234e-05	7.76347e-05	7.27047e-05	4.04191e-05	1.82164e-05	3.90977e-05	2.73108e-05	1.44588e-05	2.6846e-05	4.77704e-05	5.22479e-05	5.51928e-05	3.65099e-05	2.48332e-05	3.08455e-05	9.86684e-05	0.000103326	8.74413e-05	5.24599e-05	5.44541e-05	5.25472e-05	4.58486e-05	4.15391e-05	4.80519e-05	3.19162e-05	7.35392e-05	5.049e-05
K00685	arginine-tRNA-protein transferase [EC:2.3.2.8]	8.83419e-06	9.01874e-06	1.10736e-05	5.49462e-06	5.08706e-06	5.39606e-06	6.17732e-06	8.05474e-06	7.15472e-06	1.85153e-05	1.83807e-05	1.63513e-05	9.33744e-06	2.31149e-06	5.91281e-06	3.40612e-06	3.24185e-06	4.8794e-06	1.13089e-05	1.37119e-05	1.3499e-05	1.11937e-05	5.68071e-06	8.14987e-06	6.49173e-06	6.95484e-06	6.97866e-06	2.63657e-05	3.0086e-05	2.59424e-05	1.74949e-06	1.99405e-06	2.79126e-06	2.56847e-06	6.52677e-06	4.82368e-06
K00686	protein-glutamine gamma-glutamyltransferase [EC:2.3.2.13]	1.14627e-06	1.09551e-06	1.38412e-06	6.37606e-06	6.10145e-06	5.38768e-06	1.12992e-06	1.70417e-06	7.02165e-07	7.37046e-07	2.33591e-08	8.69788e-07	5.65944e-07	0	1.27395e-06	9.09515e-07	9.92244e-07	0	1.91637e-07	8.2318e-08	2.54367e-07	1.47236e-06	1.37575e-06	1.54735e-06	1.11599e-07	1.0264e-07	1.71558e-07	8.84452e-08	6.81762e-08	2.62816e-08	1.47276e-07	3.75712e-07	1.81245e-07	1.75538e-07	5.86277e-07	5.29133e-07
K00687	penicillin-binding protein 2B [EC:2.3.2.-]	4.55712e-06	4.5746e-06	5.77115e-06	2.11543e-05	2.05823e-05	1.7577e-05	1.42161e-06	9.86922e-07	6.33859e-07	1.43425e-06	2.68592e-08	2.35821e-06	3.16756e-07	1.90953e-07	9.29266e-06	1.68204e-06	1.67275e-06	2.74541e-07	8.06552e-07	3.04934e-07	1.03825e-06	4.97107e-06	4.57687e-06	5.41017e-06	1.527e-07	6.8008e-08	1.04597e-07	3.23172e-07	2.70183e-07	1.14204e-07	4.1822e-07	7.2462e-07	8.34458e-07	2.99095e-07	4.36757e-07	7.59743e-07
K00688	starch phosphorylase [EC:2.4.1.1]	0.00126772	0.00128826	0.00132829	0.00123668	0.00122601	0.00124794	0.00153529	0.00157515	0.00153561	0.00176421	0.00181064	0.00178748	0.00140827	0.0013549	0.00121107	0.00124415	0.0012445	0.00124382	0.00123393	0.00129849	0.00123068	0.00161868	0.0013315	0.00145187	0.0016554	0.00167528	0.00161773	0.00203381	0.0021269	0.00216575	0.00141864	0.00162077	0.00154927	0.00159438	0.0014427	0.00134351
K00689	dextransucrase [EC:2.4.1.5]	7.57015e-05	7.46387e-05	6.97266e-05	6.87664e-05	7.32068e-05	7.43171e-05	5.55767e-05	5.57075e-05	5.35444e-05	3.75263e-05	3.392e-05	3.59492e-05	5.61148e-05	7.63838e-05	6.30174e-05	7.70472e-05	7.84851e-05	8.01717e-05	8.84378e-05	7.60701e-05	8.6049e-05	6.57866e-05	8.65606e-05	7.66666e-05	4.63296e-05	4.3179e-05	5.13243e-05	3.90409e-05	2.60353e-05	2.21376e-05	6.79287e-05	5.26897e-05	5.65152e-05	4.71315e-05	5.79765e-05	7.231e-05
K00690	sucrose phosphorylase [EC:2.4.1.7]	2.69936e-06	3.64504e-06	5.02551e-06	1.37061e-05	1.38268e-05	1.37406e-05	6.8905e-06	1.15564e-05	7.09973e-06	2.62315e-05	2.64452e-05	2.97358e-05	1.63299e-07	1.49508e-06	4.67428e-06	1.53113e-06	5.10708e-06	2.00123e-09	2.736e-06	2.07148e-06	2.4917e-06	3.16068e-05	1.45592e-05	2.06744e-05	6.22771e-06	6.87925e-06	7.05109e-06	6.18005e-05	5.59436e-05	5.55894e-05	2.49837e-06	3.62683e-06	2.58431e-06	2.03083e-06	5.02747e-06	4.60147e-06
K00691	maltose phosphorylase [EC:2.4.1.8]	0.000543589	0.000535691	0.000507059	0.000482482	0.000508801	0.000516522	0.000378861	0.000378719	0.000369333	0.000256558	0.000234934	0.000244303	0.000371262	0.000508125	0.000423622	0.000531344	0.00054559	0.00053646	0.000605885	0.000524679	0.000590689	0.00045009	0.000585656	0.000523819	0.000323565	0.000303267	0.000354609	0.000260566	0.000173999	0.000148057	0.000452055	0.00034987	0.000377091	0.000322574	0.000408252	0.000501197
K00692	levansucrase [EC:2.4.1.10]	9.93517e-06	8.49187e-06	9.81063e-06	7.9852e-06	7.2409e-06	7.36475e-06	8.44339e-06	1.01179e-05	1.04952e-05	3.5044e-06	3.46033e-06	2.97615e-06	3.17817e-06	1.35694e-06	6.02204e-06	4.59795e-06	2.76468e-06	4.40986e-06	9.01568e-06	9.50458e-06	1.06275e-05	4.80287e-06	4.17599e-06	5.03233e-06	1.01373e-05	1.06743e-05	9.036e-06	7.09588e-07	6.58374e-07	5.18744e-07	1.08252e-06	1.0235e-06	1.35549e-06	2.85733e-06	1.15546e-05	7.63427e-06
K00693	glycogen(starch) synthase [EC:2.4.1.11]	8.56861e-07	1.53706e-06	1.40259e-06	2.98325e-06	2.7997e-06	2.92618e-06	1.93909e-06	3.07779e-06	1.99987e-06	5.84467e-06	6.37892e-06	5.85413e-06	0	4.27165e-07	0	3.14784e-07	1.31942e-06	0	1.2139e-06	1.06497e-06	1.23887e-06	8.68786e-06	3.93556e-06	5.73688e-06	1.77831e-06	1.97729e-06	2.04835e-06	1.38966e-05	1.46551e-05	1.49882e-05	5.39403e-07	5.05781e-07	5.3685e-07	9.1592e-07	1.31627e-06	1.17078e-06
K00694	cellulose synthase (UDP-forming) [EC:2.4.1.12]	0.000427468	0.000423037	0.000406043	0.000368185	0.000388283	0.00039762	0.00032158	0.000322288	0.000314113	0.000269173	0.000247348	0.000255102	0.00033238	0.000416507	0.000356953	0.000421684	0.000422229	0.000446855	0.000500571	0.000459	0.000493466	0.00037755	0.000468941	0.000426202	0.000283225	0.000267307	0.000311125	0.000308974	0.000266712	0.000248927	0.000395862	0.000316971	0.000337388	0.0003193	0.000342632	0.000405495
K00695	sucrose synthase [EC:2.4.1.13]	0	2.04081e-08	1.14052e-08	6.26162e-09	6.82154e-09	3.14701e-08	0	0	0	0	0	0	0	0	1.35802e-07	5.75814e-10	0	0	5.47843e-08	4.71217e-08	5.64787e-08	0	0	0	1.38777e-10	0	0	0	0	2.22062e-10	0	2.08014e-09	2.67469e-09	4.09449e-08	0	1.76096e-09
K00696	sucrose-phosphate synthase [EC:2.4.1.14]	1.93021e-05	1.79197e-05	2.08319e-05	1.96245e-05	1.89681e-05	1.86428e-05	2.11797e-05	2.37501e-05	2.44271e-05	2.29925e-05	2.68629e-05	2.5242e-05	6.64566e-06	5.95828e-06	5.59764e-06	1.13264e-05	7.18085e-06	1.33907e-05	1.92875e-05	2.35299e-05	2.10227e-05	2.94051e-05	1.84636e-05	2.44837e-05	2.69645e-05	2.7725e-05	2.58811e-05	4.09108e-05	4.07545e-05	4.17035e-05	9.54078e-06	1.10749e-05	1.21627e-05	2.28235e-05	2.79325e-05	2.04518e-05
K00697	trehalose 6-phosphate synthase [EC:2.4.1.15]	6.58166e-05	7.65428e-05	7.98072e-05	0.000103496	9.09237e-05	9.5187e-05	8.80589e-05	0.000102045	9.66222e-05	0.000153334	0.000166128	0.000149454	5.6005e-05	3.49309e-05	9.26782e-05	4.25295e-05	5.03272e-05	5.28375e-05	7.37108e-05	9.76165e-05	7.7648e-05	0.000177965	9.88057e-05	0.000132499	0.000114496	0.000119249	0.000113961	0.000303056	0.000346456	0.000370869	9.29944e-05	8.67801e-05	9.50826e-05	0.00011863	0.000104033	7.938e-05
K00700	1,4-alpha-glucan branching enzyme [EC:2.4.1.18]	0.000587104	0.000569079	0.00056438	0.000548414	0.000556829	0.000566513	0.000668904	0.000653266	0.000670043	0.000509826	0.000507305	0.000501698	0.00057066	0.000507883	0.00062737	0.000542047	0.000498363	0.000563527	0.000681925	0.000670002	0.000690211	0.000546956	0.000589631	0.000571563	0.000844313	0.000849908	0.000809072	0.000536895	0.000513189	0.000513332	0.000699081	0.000606027	0.000669147	0.000564857	0.000720702	0.000675387
K00701	cyclomaltodextrin glucanotransferase [EC:2.4.1.19]	0.000110364	0.000110465	0.000111858	7.41383e-05	7.79299e-05	7.81566e-05	5.89387e-05	5.82487e-05	5.5852e-05	5.15685e-05	4.88447e-05	5.11619e-05	6.96997e-05	8.75742e-05	6.42491e-05	0.000100136	0.000115383	7.93772e-05	8.50502e-05	7.48002e-05	8.02226e-05	6.47389e-05	8.20845e-05	7.61078e-05	4.24053e-05	3.90101e-05	4.64877e-05	3.57985e-05	2.43734e-05	2.05203e-05	6.47367e-05	6.64391e-05	6.07282e-05	6.47012e-05	6.23156e-05	7.98881e-05
K00703	starch synthase [EC:2.4.1.21]	0.000478555	0.000487378	0.000486169	0.000486669	0.000492851	0.000489495	0.000488832	0.000495156	0.000483249	0.000531798	0.000530785	0.000527426	0.000535869	0.000581103	0.000477196	0.000497506	0.000518763	0.000495019	0.000472639	0.000436394	0.000473619	0.000476499	0.000488591	0.000477712	0.000415425	0.000416164	0.000419298	0.000454645	0.000428448	0.000419698	0.000492712	0.000526283	0.000484757	0.000420862	0.000419235	0.000439581
K00705	4-alpha-glucanotransferase [EC:2.4.1.25]	0.000506794	0.000499843	0.000493421	0.000503485	0.000505659	0.000512845	0.000498709	0.000511004	0.000499724	0.000568327	0.000588815	0.000588917	0.000432986	0.00042156	0.000475442	0.000494243	0.000465662	0.00052337	0.000529649	0.000552191	0.000520049	0.000558427	0.000538092	0.000548217	0.000544598	0.00053881	0.000551155	0.000669475	0.000707426	0.000736759	0.000548388	0.000492369	0.0005308	0.000566288	0.000537436	0.000539774
K00712	poly(glycerol-phosphate) alpha-glucosyltransferase [EC:2.4.1.52]	2.96628e-07	4.20829e-07	4.34937e-07	1.19691e-06	1.48821e-06	1.1503e-06	7.30951e-07	1.15984e-06	7.61582e-07	2.12874e-06	2.39105e-06	2.25003e-06	4.13651e-08	2.20436e-07	5.80372e-06	4.00502e-07	5.83038e-07	9.67582e-08	3.07559e-07	2.1304e-07	2.3691e-07	3.24968e-06	1.46742e-06	2.16463e-06	7.36299e-07	7.42671e-07	7.61894e-07	5.24206e-06	5.56464e-06	5.68881e-06	2.79519e-07	4.34759e-07	4.82355e-07	2.23557e-07	4.90788e-07	5.43169e-07
K00713	UDP-glucose:(glucosyl)LPS alpha-1,2-glucosyltransferase [EC:2.4.1.-]	0	0	4.21385e-09	0	0	0	0	0	0	0	0	0	0	0	4.17664e-07	0	0	0	4.13227e-09	4.4264e-09	0	0	0	0	0	0	0	0	0	0	8.88968e-09	8.55286e-09	2.48112e-08	0	0	1.43391e-08
K00720	ceramide glucosyltransferase [EC:2.4.1.80]	1.02498e-05	1.15485e-05	1.21111e-05	1.22815e-05	1.12533e-05	1.18783e-05	2.876e-05	2.78452e-05	2.73912e-05	2.3771e-05	2.60586e-05	2.44496e-05	2.50988e-05	1.24449e-05	1.92081e-05	6.19021e-06	7.15301e-06	7.5734e-06	1.01635e-05	1.06584e-05	1.03498e-05	3.16735e-05	1.54786e-05	2.23839e-05	4.61527e-05	4.853e-05	4.1285e-05	4.74124e-05	5.09969e-05	5.18197e-05	2.84665e-05	3.32642e-05	3.68888e-05	1.67122e-05	2.64684e-05	1.98264e-05
K00721	dolichol-phosphate mannosyltransferase [EC:2.4.1.83]	0.000496801	0.000507433	0.000557676	0.000447469	0.00041554	0.000429948	0.000718704	0.000703742	0.000729367	0.000784594	0.000776594	0.000802606	0.000716821	0.000579618	0.00048799	0.000518051	0.000471114	0.000539889	0.000406914	0.000572354	0.000406032	0.000624742	0.000432413	0.000530836	0.000820837	0.000835925	0.000790751	0.000925472	0.0010792	0.0011671	0.000635468	0.000877664	0.000794663	0.00108919	0.000722996	0.000585414
K00729	dolichyl-phosphate beta-glucosyltransferase [EC:2.4.1.117]	5.38375e-06	5.48904e-06	5.99208e-06	7.22964e-06	6.78419e-06	7.00765e-06	5.88007e-06	8.09111e-06	6.87568e-06	9.75651e-06	1.08085e-05	1.00602e-05	2.50238e-07	1.74139e-06	2.66852e-06	2.15236e-06	2.90562e-06	2.08635e-06	4.61155e-06	4.62039e-06	5.09624e-06	1.4766e-05	7.39563e-06	1.05736e-05	6.3832e-06	6.87407e-06	6.33767e-06	2.1272e-05	2.25979e-05	2.30419e-05	1.9691e-06	2.58784e-06	3.15915e-06	2.15835e-06	6.26725e-06	4.76861e-06
K00737	beta-1,4-mannosyl-glycoprotein beta-1,4-N-acetylglucosaminyltransferase [EC:2.4.1.144]	7.47376e-09	3.75648e-09	2.08566e-09	2.90723e-08	1.1675e-07	6.06953e-08	6.76845e-09	0	1.14256e-09	9.82468e-07	4.37774e-07	6.86117e-07	1.76925e-07	2.97705e-09	8.84107e-08	0	0	8.13986e-08	2.50259e-10	2.68072e-10	0	1.22843e-07	7.79206e-08	5.79577e-08	0	0	0	9.39984e-08	6.33182e-08	7.0373e-10	5.38377e-10	5.17978e-10	1.50262e-09	1.54716e-08	3.39115e-08	1.0196e-07
K00748	lipid-A-disaccharide synthase [EC:2.4.1.182]	6.73228e-05	7.43133e-05	7.78105e-05	8.8907e-05	7.87344e-05	8.0389e-05	0.000104862	0.000109586	0.000113283	0.000107337	0.000118275	9.76122e-05	6.50207e-05	2.94556e-05	5.76245e-05	3.15194e-05	2.48113e-05	2.87835e-05	7.78081e-05	8.34732e-05	8.78459e-05	0.000118019	6.87714e-05	8.99517e-05	0.000161389	0.000170072	0.000145425	0.000164167	0.000173441	0.000176332	8.63902e-05	7.71616e-05	9.09e-05	5.27771e-05	0.000117306	8.21126e-05
K00752	hyaluronan synthase [EC:2.4.1.212]	1.7659e-05	1.61323e-05	1.88299e-05	1.46527e-05	1.46604e-05	1.32011e-05	1.4907e-05	1.62813e-05	1.80574e-05	1.40188e-05	1.61088e-05	1.27671e-05	5.06585e-06	7.23726e-06	6.05826e-06	9.26291e-06	6.6925e-06	8.60505e-06	1.45236e-05	1.51933e-05	1.69006e-05	1.26673e-05	1.02153e-05	1.25127e-05	1.59689e-05	1.66786e-05	1.41648e-05	2.66696e-06	2.1762e-06	1.24535e-06	2.7597e-06	5.78005e-06	4.22895e-06	8.25437e-06	1.83978e-05	1.26405e-05
K00754	[EC:2.4.1.-]	0.000563026	0.000568236	0.000577294	0.000633551	0.000627668	0.000629871	0.000637041	0.000663407	0.000629588	0.000668164	0.000659048	0.000669237	0.000590851	0.000560031	0.000511187	0.000555606	0.000570474	0.000539233	0.000557039	0.000570311	0.0005556	0.000737713	0.000622466	0.000669204	0.000665457	0.000671878	0.000662116	0.000881118	0.000911174	0.000927391	0.000590626	0.000620072	0.000611563	0.000633489	0.000622926	0.000598805
K00756	pyrimidine-nucleoside phosphorylase [EC:2.4.2.2]	0.000422811	0.00042024	0.000395464	0.000478056	0.000486869	0.000474957	0.000311472	0.000303195	0.000301557	0.000226418	0.00020859	0.000214684	0.000346067	0.000418249	0.000417825	0.000450767	0.000483199	0.000417766	0.000427601	0.000373483	0.000419073	0.000370739	0.000454921	0.000414022	0.000230105	0.000221304	0.00025439	0.000207678	0.000159372	0.00014562	0.000361227	0.000272297	0.000296821	0.00024525	0.000324152	0.000392199
K00757	uridine phosphorylase [EC:2.4.2.3]	6.8298e-05	7.09246e-05	7.43045e-05	4.83364e-05	4.97431e-05	5.12952e-05	8.29105e-05	8.24804e-05	8.09745e-05	7.93884e-05	7.53813e-05	7.67482e-05	9.70606e-05	9.971e-05	7.02615e-05	7.00617e-05	7.64279e-05	6.56627e-05	6.04457e-05	5.5761e-05	6.018e-05	5.28661e-05	5.51208e-05	5.35784e-05	7.40412e-05	7.49474e-05	7.08011e-05	4.82355e-05	4.369e-05	4.06233e-05	7.11711e-05	0.000102706	8.36119e-05	7.5847e-05	6.11902e-05	5.96477e-05
K00758	thymidine phosphorylase [EC:2.4.2.4]	0.000220517	0.000237812	0.000265002	0.000148461	0.000140016	0.000149292	0.000286075	0.000273214	0.000280025	0.000391152	0.000369847	0.00039358	0.000396583	0.000377106	0.000246162	0.000281203	0.000284757	0.000293507	0.000151715	0.000235188	0.00013889	0.000211097	0.000169514	0.000192838	0.000223772	0.000219312	0.000233344	0.000337066	0.000414994	0.000451532	0.000261115	0.000466206	0.000357093	0.000587094	0.000231476	0.000209855
K00759	adenine phosphoribosyltransferase [EC:2.4.2.7]	0.000306467	0.000314004	0.000318788	0.000272	0.000274216	0.000278207	0.000283122	0.000285152	0.000278058	0.000336836	0.000331457	0.000341403	0.000330531	0.000363136	0.000275887	0.000330052	0.000340525	0.000336577	0.000278025	0.000291233	0.000267581	0.000285117	0.000293218	0.000291854	0.000219829	0.000211803	0.000235297	0.000298168	0.00030415	0.000306123	0.00027453	0.000350539	0.000305197	0.000394244	0.000254366	0.000276868
K00760	hypoxanthine phosphoribosyltransferase [EC:2.4.2.8]	0.000381495	0.000377426	0.000362123	0.000377886	0.000388613	0.000388398	0.000312847	0.000315505	0.000309407	0.000257575	0.000250285	0.000251163	0.000302892	0.000361635	0.000359517	0.000375388	0.000386632	0.000370751	0.000410458	0.000364212	0.000407135	0.000347047	0.000407116	0.000377531	0.000286084	0.000279587	0.000297056	0.000244126	0.000199824	0.000186104	0.000346683	0.000280465	0.000300658	0.000238452	0.000322082	0.000361879
K00761	uracil phosphoribosyltransferase [EC:2.4.2.9]	0.000210081	0.000216748	0.000222036	0.00018482	0.000183472	0.000185467	0.000172252	0.000183833	0.000177762	0.000219241	0.000222366	0.000214893	0.000186769	0.000220044	0.000179104	0.000196236	0.0002099	0.000190446	0.000186316	0.000176507	0.000187439	0.000159371	0.000173334	0.000168584	0.000121026	0.000118203	0.000125962	0.000134808	0.000123359	0.000117013	0.000146006	0.000187073	0.000152383	0.000174285	0.000146367	0.000156054
K00762	orotate phosphoribosyltransferase [EC:2.4.2.10]	0.000290593	0.000297532	0.000309411	0.000265861	0.000257894	0.000262497	0.000322694	0.000318805	0.000323426	0.000355948	0.000350224	0.000358852	0.000345633	0.000326467	0.000287036	0.000303904	0.000305524	0.000302063	0.000255314	0.000293616	0.000251343	0.000303525	0.00026933	0.000287521	0.000320438	0.000321172	0.000318496	0.000353691	0.000386755	0.000402605	0.000300043	0.000378764	0.0003443	0.000436282	0.000312886	0.000293923
K00763	nicotinate phosphoribosyltransferase [EC:2.4.2.11]	0.000539115	0.000549662	0.000553223	0.000474476	0.000484175	0.000491076	0.000516863	0.000516696	0.000502874	0.000560513	0.000550461	0.000562656	0.000588357	0.000622226	0.000528714	0.000557031	0.00057571	0.000566497	0.000520586	0.000509239	0.000504992	0.000472502	0.000519325	0.000498716	0.0004541	0.000443211	0.000465192	0.000453278	0.000437535	0.0004312	0.000526576	0.00061869	0.000556556	0.000595608	0.000458031	0.000494986
K00764	amidophosphoribosyltransferase [EC:2.4.2.14]	0.000611057	0.00061409	0.00061421	0.00062933	0.000623462	0.000626157	0.000705733	0.000685143	0.000696884	0.00065967	0.000653701	0.000661848	0.00070127	0.000633381	0.000660591	0.000640135	0.000632938	0.000635066	0.000619042	0.000658384	0.000612292	0.000685479	0.000638403	0.000658979	0.00078841	0.000793796	0.000775202	0.000778383	0.000815626	0.000840348	0.00072459	0.000734879	0.000748978	0.000785344	0.0007253	0.00069434
K00765	ATP phosphoribosyltransferase [EC:2.4.2.17]	0.00028011	0.000281799	0.00028539	0.000298646	0.00028852	0.000292827	0.000329102	0.000321657	0.000329176	0.000350998	0.000353488	0.000362741	0.000316175	0.000271505	0.000283352	0.000298897	0.00027629	0.00031966	0.000274418	0.000334032	0.000267521	0.000358791	0.000301451	0.000331324	0.000369941	0.000369894	0.000372097	0.000474503	0.00053161	0.000564178	0.000339613	0.000362817	0.000372241	0.000482353	0.000360551	0.000335688
K00766	anthranilate phosphoribosyltransferase [EC:2.4.2.18]	0.000243342	0.000247001	0.000261487	0.000275139	0.000259148	0.000255101	0.000343216	0.000331476	0.000345351	0.000379111	0.000388129	0.000383958	0.000335294	0.000242452	0.000295314	0.00025134	0.000241554	0.000235846	0.000205797	0.00026145	0.000210905	0.000312274	0.000226421	0.000266109	0.000413595	0.000426037	0.000391383	0.000420868	0.000478011	0.000496679	0.000314176	0.00035847	0.000359716	0.000397012	0.00034868	0.000291792
K00767	nicotinate-nucleotide pyrophosphorylase (carboxylating) [EC:2.4.2.19]	0.000279608	0.000285853	0.00029524	0.000285472	0.000277031	0.000279696	0.000331994	0.000332079	0.000333804	0.000386075	0.000379332	0.000389915	0.000364929	0.00034958	0.000295352	0.000310934	0.000304695	0.000322569	0.000257118	0.000295243	0.000256586	0.00031884	0.000280763	0.00029782	0.000305172	0.000306834	0.000307705	0.00038085	0.000418142	0.000437801	0.000313452	0.000383858	0.0003469	0.000434967	0.000308815	0.00028898
K00768	nicotinate-nucleotide--dimethylbenzimidazole phosphoribosyltransferase [EC:2.4.2.21]	0.000365392	0.000357717	0.000342996	0.000421823	0.000425325	0.000418358	0.000363103	0.000374399	0.00036949	0.000380791	0.000399162	0.00038784	0.000321954	0.000346788	0.000402363	0.000369233	0.000363168	0.000376594	0.000394038	0.000360571	0.00039914	0.000393349	0.000404596	0.000394257	0.000357499	0.00036061	0.000356533	0.000357453	0.000336828	0.000327689	0.000367548	0.000297806	0.00033041	0.000236615	0.000365117	0.000374571
K00769	xanthine phosphoribosyltransferase [EC:2.4.2.22]	3.94424e-05	4.67053e-05	5.41446e-05	2.32631e-05	1.99201e-05	2.1373e-05	4.67438e-05	5.09241e-05	4.98268e-05	8.03378e-05	7.96362e-05	7.65036e-05	6.85022e-05	8.02955e-05	3.7621e-05	4.08447e-05	5.09622e-05	3.40354e-05	1.59127e-05	1.75379e-05	1.7782e-05	2.11622e-05	1.42644e-05	1.70741e-05	1.66766e-05	1.78943e-05	1.5062e-05	2.11237e-05	2.14881e-05	2.31557e-05	2.29989e-05	7.50577e-05	3.8715e-05	6.05743e-05	1.8173e-05	1.18711e-05
K00772	5'-methylthioadenosine phosphorylase [EC:2.4.2.28]	0.000174374	0.000188422	0.000201094	0.000223294	0.000208388	0.000194695	0.000212993	0.000206207	0.000213741	0.000341281	0.000340373	0.00034572	0.000321814	0.000315283	0.000241993	0.000250968	0.000280074	0.000217222	7.32934e-05	0.000110782	7.40777e-05	0.000182119	0.00013196	0.000152438	0.000105729	0.000112977	0.000110422	0.000219667	0.000262236	0.000273784	0.000169535	0.000292345	0.000220171	0.000304978	0.000149392	0.000140444
K00773	queuine tRNA-ribosyltransferase [EC:2.4.2.29]	0.000475173	0.000497425	0.000519253	0.000436234	0.00042264	0.00042941	0.00053303	0.000532121	0.000531406	0.000652732	0.000646555	0.000657931	0.000615661	0.000609874	0.000469925	0.000518301	0.000535672	0.000515256	0.000393795	0.000452276	0.000384407	0.000495782	0.000431871	0.000463611	0.000469531	0.000469921	0.000472848	0.000603877	0.000661214	0.000691271	0.000493588	0.000677502	0.000578905	0.000741767	0.000470728	0.000450598
K00776	NAD-diphthamide ADP-ribosyltransferase [EC:2.4.2.36]	2.52549e-08	0	3.85844e-08	1.91565e-08	5.73638e-09	0	0	6.69516e-09	4.86468e-08	0	0	0	0	0	4.67412e-06	4.54711e-09	8.57611e-07	8.4633e-09	0	5.64624e-09	0	0	0	0	1.0959e-09	0	0	0	0	1.09666e-08	0	0	3.14391e-08	4.90612e-09	0	0
K00777	[EC:2.4.2.-]	3.8108e-06	4.29413e-06	3.03475e-06	1.67821e-05	1.56637e-05	1.38631e-05	7.21975e-06	6.46009e-06	7.14152e-06	9.32663e-06	9.55342e-06	9.11118e-06	1.29081e-05	1.1149e-05	1.70057e-05	1.06736e-05	1.37838e-05	8.15211e-06	1.29736e-06	1.20408e-06	1.8761e-06	1.19829e-05	8.17022e-06	9.15751e-06	1.78277e-06	2.73486e-06	2.27339e-06	1.05776e-05	1.12904e-05	1.0738e-05	5.94681e-06	3.63953e-06	4.89597e-06	1.65435e-06	5.56871e-06	6.12356e-06
K00782	hypothetical protein	9.00314e-05	8.56462e-05	9.86526e-05	8.05463e-05	7.48729e-05	7.32956e-05	0.000133757	0.000131437	0.000143716	8.40117e-05	8.28312e-05	7.51833e-05	7.73131e-05	3.46295e-05	9.39181e-05	4.34266e-05	3.15752e-05	3.06459e-05	0.000100049	0.000109969	0.000115565	7.96299e-05	5.25895e-05	6.82084e-05	0.000215924	0.000227062	0.000190678	0.000105769	0.000121027	0.000121183	0.00010779	9.60059e-05	0.000112891	6.71948e-05	0.000158058	0.000106317
K00783	23S rRNA (pseudouridine1915-N3)-methyltransferase [EC:2.1.1.177]	0.000183021	0.000180897	0.00017601	0.000194561	0.00019517	0.000192222	0.000160068	0.000158515	0.000159802	0.000143698	0.00014305	0.000141719	0.000156516	0.000161713	0.000165415	0.000182767	0.000183712	0.000172729	0.000182243	0.000174555	0.000182293	0.000172186	0.000182511	0.00017769	0.000156487	0.000156233	0.000158981	0.000151506	0.000147593	0.000146719	0.000171808	0.00014061	0.000155169	0.000137953	0.000172247	0.000180347
K00784	ribonuclease Z [EC:3.1.26.11]	0.000265087	0.000272146	0.000279202	0.000246779	0.000244978	0.000251704	0.000321795	0.000319875	0.000314267	0.000366385	0.000362874	0.000374248	0.000337174	0.000320067	0.000264692	0.00028484	0.00027976	0.000295624	0.000256228	0.000281978	0.000248694	0.000309083	0.000277243	0.000291112	0.000330031	0.000329308	0.000328364	0.000381661	0.000402274	0.000406401	0.00031249	0.000384004	0.000358781	0.000403375	0.000292667	0.000285805
K00785	beta-galactosamide-alpha-2,3-sialyltransferase [EC:2.4.99.-]	0	0	7.25017e-10	0	0	0	0	0	0	0	0	0	0	0	1.46864e-07	0	0	0	1.15186e-09	7.61588e-10	0	0	0	0	0	0	0	0	0	0	1.52952e-09	2.38409e-09	5.16298e-09	0	0	3.23963e-09
K00786	[EC:2.4.-.-]	0.000224774	0.000231754	0.000234807	0.000274378	0.000274983	0.000269453	0.000206224	0.000213965	0.000198436	0.000236951	0.000222802	0.000235175	0.000221963	0.000255236	0.000194267	0.000225678	0.00024228	0.000218231	0.000212761	0.000200868	0.000208817	0.000266825	0.000252695	0.000257069	0.000160672	0.000158105	0.000171248	0.000275768	0.00027564	0.000277217	0.000206878	0.000231063	0.000207125	0.000215689	0.000178575	0.000197017
K00788	thiamine-phosphate pyrophosphorylase [EC:2.5.1.3]	0.000455958	0.000454444	0.000444096	0.000460684	0.000465418	0.000466432	0.000434926	0.000435584	0.000433731	0.00040511	0.000401474	0.000402877	0.000421019	0.000454415	0.000436635	0.000458542	0.000459063	0.000460442	0.000476416	0.000455109	0.000474009	0.000457337	0.000479497	0.000467627	0.000432629	0.000430435	0.000436622	0.000422309	0.000405329	0.000409125	0.000464811	0.00042456	0.000437194	0.000405569	0.000445351	0.000460263
K00789	S-adenosylmethionine synthetase [EC:2.5.1.6]	0.000500837	0.000512857	0.00052129	0.000515566	0.000504647	0.000504394	0.000519181	0.000524232	0.000520163	0.000593108	0.000592245	0.000594687	0.000544591	0.000544427	0.000506021	0.000517614	0.000537613	0.000500322	0.000447355	0.000472707	0.000444506	0.00056528	0.000504118	0.000529516	0.000482326	0.000485199	0.00048521	0.000609861	0.000638331	0.00065404	0.00049736	0.000566224	0.000531482	0.000590445	0.000495669	0.00048624
K00790	UDP-N-acetylglucosamine 1-carboxyvinyltransferase [EC:2.5.1.7]	0.000674311	0.00066856	0.000638811	0.000842535	0.000839013	0.000802151	0.000566826	0.000551864	0.000563328	0.000500231	0.000497376	0.000488465	0.000615188	0.000651171	0.000764968	0.000727672	0.000786056	0.000634387	0.000621323	0.000561209	0.000627077	0.000645439	0.000687244	0.000660569	0.000472451	0.000479567	0.00048559	0.000461472	0.000422765	0.000409152	0.000609022	0.000456325	0.000514136	0.000372888	0.000591152	0.000642394
K00791	tRNA dimethylallyltransferase [EC:2.5.1.75]	0.000395148	0.000393743	0.000381009	0.000437978	0.000440404	0.000434177	0.000350014	0.000358038	0.000351061	0.00033511	0.000341525	0.000330872	0.000324543	0.000353706	0.00039277	0.000383793	0.000402645	0.000362224	0.000399757	0.000361843	0.000401683	0.000412061	0.000418232	0.000411353	0.000334803	0.000335896	0.000338712	0.000361467	0.000332325	0.00032104	0.000358724	0.000289724	0.000319911	0.000238111	0.0003589	0.000380949
K00793	riboflavin synthase [EC:2.5.1.9]	0.00016765	0.000167951	0.000172368	0.000174572	0.000169359	0.000168826	0.000192454	0.000190371	0.000194099	0.000199003	0.000201208	0.000201136	0.000185337	0.000156201	0.000180631	0.000166587	0.000162606	0.000162455	0.000157396	0.000176093	0.000158901	0.00018019	0.000157421	0.000168972	0.000215135	0.00021848	0.000208982	0.000218088	0.000238847	0.000249348	0.000188781	0.000195373	0.000197882	0.000214952	0.000200624	0.000181876
K00794	6,7-dimethyl-8-ribityllumazine synthase [EC:2.5.1.78]	0.000151284	0.000152693	0.000153697	0.00017271	0.00016651	0.000165364	0.00017377	0.000167974	0.000175098	0.000184626	0.000185307	0.000186844	0.000179729	0.000155654	0.000165666	0.000166191	0.000156986	0.000171231	0.000145686	0.000172463	0.000145085	0.000174555	0.000153905	0.0001646	0.000183063	0.00018445	0.000183676	0.000219845	0.000247391	0.000263279	0.00018012	0.00018545	0.000188011	0.000234425	0.000186673	0.000173297
K00795	farnesyl diphosphate synthase [EC:2.5.1.1 2.5.1.10]	9.13445e-05	9.24713e-05	9.61023e-05	0.000118431	0.000112339	0.000106801	8.73956e-05	9.15774e-05	9.35285e-05	0.000112681	0.00011699	0.000109432	9.1994e-05	8.28706e-05	9.58872e-05	8.66548e-05	8.88352e-05	7.53001e-05	7.79172e-05	7.96172e-05	8.60839e-05	8.02471e-05	7.21664e-05	7.57535e-05	7.2728e-05	7.68256e-05	6.99603e-05	7.96763e-05	8.38251e-05	8.21131e-05	7.40072e-05	6.85243e-05	6.63484e-05	5.61548e-05	8.52248e-05	7.44456e-05
K00796	dihydropteroate synthase [EC:2.5.1.15]	0.000288088	0.000298692	0.000303329	0.000332824	0.000320923	0.000315435	0.000313028	0.000310696	0.000313989	0.000378073	0.000379855	0.000377529	0.000354469	0.000342632	0.000349962	0.000320705	0.0003389	0.000303412	0.000240417	0.000266224	0.000239378	0.000338908	0.000293365	0.000310704	0.000271163	0.000274734	0.0002743	0.000361979	0.000392794	0.000407731	0.000295759	0.000349303	0.0003193	0.000375304	0.000290011	0.000280851
K00797	spermidine synthase [EC:2.5.1.16]	0.000358404	0.000368845	0.000369521	0.000392953	0.000392422	0.000378895	0.000342551	0.000336037	0.000336391	0.000397116	0.000394636	0.000392572	0.000442414	0.000459785	0.000399099	0.000405054	0.000440052	0.000375106	0.000305963	0.000289188	0.000305751	0.000309066	0.000329003	0.000316316	0.000238017	0.000239195	0.000246534	0.000264774	0.000245526	0.000225764	0.000320179	0.000375567	0.000329005	0.000318664	0.000279239	0.000306347
K00798	cob(I)alamin adenosyltransferase [EC:2.5.1.17]	0.000190644	0.000204733	0.000213823	0.000208994	0.00020166	0.000197193	0.000264408	0.000256529	0.000257567	0.000313097	0.000314804	0.000308645	0.000316088	0.000273693	0.000265036	0.000217277	0.000240543	0.000192862	0.000153503	0.000166477	0.000154433	0.000205886	0.000166534	0.000181329	0.000263964	0.000272207	0.000250286	0.000261307	0.000277491	0.00027192	0.000234592	0.000316186	0.000278787	0.000265445	0.000212387	0.000194125
K00799	glutathione S-transferase [EC:2.5.1.18]	5.34168e-05	5.41162e-05	6.45727e-05	1.93529e-05	1.96228e-05	2.03078e-05	2.34714e-05	2.40934e-05	2.41328e-05	8.11147e-05	7.62519e-05	6.68445e-05	8.83719e-05	2.34264e-05	6.69185e-05	2.698e-05	2.23359e-05	4.84324e-05	6.9949e-05	8.3587e-05	8.14804e-05	1.52655e-05	1.85566e-05	1.81613e-05	1.94452e-05	1.94898e-05	2.37763e-05	7.69175e-05	9.29107e-05	6.28256e-05	1.79669e-05	1.7729e-05	2.28722e-05	1.68042e-05	2.39864e-05	2.37758e-05
K00800	3-phosphoshikimate 1-carboxyvinyltransferase [EC:2.5.1.19]	0.00043332	0.000430594	0.000438827	0.000441237	0.000434096	0.000431635	0.000439802	0.000442547	0.000444964	0.000471927	0.000472276	0.000475212	0.000432081	0.000402022	0.000427064	0.000430639	0.00042841	0.000417511	0.000406918	0.000433988	0.000411336	0.00044952	0.000414178	0.000431555	0.000445413	0.00044929	0.000443307	0.00050127	0.000533543	0.000549928	0.000437006	0.000429423	0.000434891	0.000471513	0.000456129	0.000435284
K00801	farnesyl-diphosphate farnesyltransferase [EC:2.5.1.21]	2.96848e-07	2.53582e-07	2.8564e-07	1.06598e-06	1.02322e-06	8.9568e-07	1.94152e-07	1.33132e-07	7.33442e-08	7.06077e-08	1.50851e-07	1.68727e-07	2.16244e-06	3.56425e-08	1.07983e-06	1.01599e-07	7.75154e-08	9.7454e-07	3.58802e-08	1.14344e-08	4.50019e-08	2.46481e-07	2.28033e-07	2.64354e-07	9.82568e-09	8.01834e-09	1.34023e-08	1.4131e-08	1.02242e-08	2.05315e-09	1.34243e-08	2.69397e-08	1.75311e-08	1.69867e-08	4.70476e-08	8.36594e-08
K00802	spermine synthase [EC:2.5.1.22]	0	0	0	0	0	0	0	0	0	0	0	0	0	0	3.75334e-08	0	0	0	2.20629e-10	0	0	0	0	0	0	0	0	0	0	0	0	4.56652e-10	4.47418e-10	0	0	3.86583e-10
K00803	alkyldihydroxyacetonephosphate synthase [EC:2.5.1.26]	2.49954e-05	2.81255e-05	3.3906e-05	2.08979e-05	2.02998e-05	1.89457e-05	4.87069e-05	4.54948e-05	4.71517e-05	5.8437e-05	5.45684e-05	5.74464e-05	7.15733e-05	5.41062e-05	6.79032e-05	2.93311e-05	3.96288e-05	2.48943e-05	1.49955e-05	1.72686e-05	1.67144e-05	1.71587e-05	1.11401e-05	1.30771e-05	4.59785e-05	4.85912e-05	4.08476e-05	3.02955e-05	2.71951e-05	2.21953e-05	3.48913e-05	6.37253e-05	4.84005e-05	4.31713e-05	2.90119e-05	2.16358e-05
K00805	heptaprenyl diphosphate synthase [EC:2.5.1.30]	0.000143594	0.000142387	0.000137937	0.00021176	0.000207968	0.000190765	0.000125524	0.000116252	0.000122654	0.000127162	0.000128292	0.000129178	0.000154377	0.000149841	0.00022086	0.000171633	0.000198585	0.000130193	9.82998e-05	8.90685e-05	9.91911e-05	0.000129587	0.00013175	0.000128608	9.2325e-05	9.68564e-05	9.21944e-05	8.16689e-05	8.15936e-05	8.44262e-05	0.000135488	0.000105756	0.000114238	8.08701e-05	0.000122273	0.000131493
K00806	undecaprenyl diphosphate synthase [EC:2.5.1.31]	0.000387824	0.000390495	0.000386754	0.000375497	0.000377701	0.000380811	0.00037094	0.000368047	0.000366805	0.000363542	0.000353144	0.000362145	0.000391646	0.000415422	0.000386181	0.000406727	0.00041192	0.000411088	0.00038848	0.000392009	0.000381422	0.000386353	0.000402751	0.000395078	0.000344114	0.000338559	0.000354803	0.000365562	0.000366024	0.000371892	0.000387089	0.000400595	0.000388712	0.000431744	0.000370006	0.000386504
K00808	homospermidine synthase [EC:2.5.1.44]	1.01604e-05	1.04103e-05	1.10808e-05	7.93015e-06	6.85304e-06	8.7306e-06	2.04527e-05	1.75805e-05	1.93306e-05	2.26842e-05	2.18561e-05	2.47658e-05	2.12954e-05	1.17601e-05	7.84669e-06	1.57087e-05	8.4701e-06	2.33519e-05	1.24057e-05	2.63717e-05	9.95649e-06	2.55009e-05	1.74176e-05	2.17511e-05	2.9684e-05	2.8602e-05	3.11518e-05	4.74877e-05	5.97837e-05	6.67153e-05	2.56682e-05	3.32264e-05	3.37216e-05	6.357e-05	2.74261e-05	2.36471e-05
K00809	deoxyhypusine synthase [EC:2.5.1.46]	0.00012029	0.000134514	0.000154208	6.17836e-05	5.3459e-05	6.63057e-05	0.00023898	0.000219826	0.000229773	0.000282625	0.000269708	0.000287271	0.000298471	0.000241698	0.000130787	0.000166821	0.000150699	0.000186975	9.09947e-05	0.000168894	7.96836e-05	0.000163544	0.000108598	0.000135575	0.000268549	0.000268664	0.000260941	0.000299114	0.000369182	0.000411775	0.00024242	0.000387064	0.000320226	0.00048484	0.000208811	0.000167384
K00810	[EC:2.5.1.-]	6.39895e-06	6.33934e-06	6.8692e-06	6.23219e-06	5.81242e-06	5.81361e-06	2.38544e-05	2.07208e-05	2.28429e-05	9.8707e-06	1.0196e-05	9.63483e-06	1.92293e-05	7.31772e-06	1.47881e-05	4.41685e-06	2.98982e-06	2.70905e-06	8.94081e-06	9.72385e-06	9.48072e-06	1.21412e-05	6.4538e-06	8.86313e-06	4.3616e-05	4.58391e-05	3.79343e-05	2.02149e-05	2.39834e-05	2.6726e-05	2.80242e-05	2.66937e-05	3.0333e-05	1.36087e-05	2.52379e-05	1.72424e-05
K00812	aspartate aminotransferase [EC:2.6.1.1]	0.00146422	0.00151631	0.00154749	0.00129952	0.00128446	0.0013127	0.00157046	0.00154834	0.00155239	0.00168325	0.00167259	0.00168414	0.00173176	0.00173926	0.00130742	0.00154637	0.0015544	0.00153761	0.00134351	0.00143832	0.00130537	0.00138083	0.00136235	0.00137693	0.00149882	0.0014871	0.00149834	0.00150495	0.00158482	0.00166285	0.00155736	0.00192198	0.00170628	0.00204811	0.00145382	0.00143048
K00813	aspartate aminotransferase [EC:2.6.1.1]	3.33696e-06	3.65278e-06	4.68659e-06	2.11583e-07	1.74448e-07	3.50124e-07	8.57803e-07	9.22076e-07	8.78097e-07	7.26153e-06	6.6451e-06	5.82669e-06	6.35814e-06	8.91414e-07	8.34256e-06	1.08956e-06	7.08675e-07	2.55328e-06	5.27638e-06	6.79763e-06	6.36133e-06	9.09871e-08	1.37166e-07	2.57568e-07	5.40638e-07	5.70163e-07	9.76939e-07	6.96762e-06	8.82861e-06	5.86562e-06	5.98922e-07	8.85713e-07	1.40704e-06	9.23763e-07	7.18362e-07	7.38409e-07
K00817	histidinol-phosphate aminotransferase [EC:2.6.1.9]	0.00106474	0.00108362	0.0010708	0.00108555	0.00107826	0.00108304	0.00107973	0.00106808	0.00107851	0.00109262	0.0010939	0.00108028	0.00113508	0.00117241	0.0011096	0.00111363	0.00112766	0.00112169	0.00107272	0.00107121	0.00106409	0.00105285	0.00108503	0.00106775	0.0010358	0.00103144	0.00104309	0.00100854	0.000998076	0.000997691	0.00108076	0.0011399	0.00109919	0.00114972	0.00104696	0.00106652
K00818	acetylornithine aminotransferase [EC:2.6.1.11]	0.00066698	0.000668231	0.000664212	0.000743626	0.000736687	0.000724118	0.00069024	0.000693903	0.00069458	0.000770174	0.000790999	0.000779853	0.000701408	0.000699355	0.000714454	0.000695613	0.000700606	0.000679305	0.000631119	0.000621128	0.000635335	0.000679146	0.000665489	0.000666783	0.000651745	0.000658253	0.000646867	0.000663844	0.000661819	0.000658888	0.000666296	0.000664976	0.000659353	0.000619848	0.000654918	0.00065474
K00819	ornithine--oxo-acid transaminase [EC:2.6.1.13]	0.000248051	0.000252344	0.00024654	0.000356886	0.000344945	0.000328844	0.00024591	0.000244921	0.0002507	0.000302984	0.000317455	0.00030638	0.000273584	0.000276124	0.00030085	0.000288801	0.0002976	0.00027516	0.000210603	0.000222424	0.000213605	0.000296704	0.000267934	0.000278639	0.000181901	0.000185353	0.000191869	0.000284548	0.00030166	0.000309233	0.000228363	0.000222203	0.00022115	0.000254257	0.000237964	0.00024176
K00820	glucosamine--fructose-6-phosphate aminotransferase (isomerizing) [EC:2.6.1.16]	0.000855462	0.000876525	0.000895807	0.000838887	0.000820296	0.000825642	0.000903782	0.000911371	0.000909791	0.00098714	0.000988525	0.000987184	0.000963518	0.000951372	0.000846664	0.000873995	0.000899797	0.000858455	0.000778898	0.00081483	0.000777587	0.000865423	0.000811219	0.000838076	0.000836709	0.000840784	0.000833597	0.00090994	0.000940621	0.000960831	0.000838682	0.000984912	0.000898887	0.00101225	0.000842314	0.000816285
K00821	acetylornithine/N-succinyldiaminopimelate aminotransferase [EC:2.6.1.11 2.6.1.17]	0.000647115	0.000653516	0.000651189	0.000709964	0.000702469	0.000693505	0.000665497	0.000664354	0.000661537	0.000750612	0.00076647	0.000761138	0.000695917	0.000675989	0.000659281	0.000681336	0.000691105	0.000662285	0.000597223	0.000606223	0.000593132	0.000689399	0.000653869	0.000666224	0.000633173	0.000636206	0.000634473	0.000714318	0.000724709	0.00072555	0.000649181	0.000670409	0.000662044	0.00067364	0.000636729	0.000644382
K00822	beta-alanine--pyruvate transaminase [EC:2.6.1.18]	0.00012032	0.000122064	0.000126294	0.000102802	0.00010243	0.00010563	0.00014354	0.000135519	0.000139162	0.000138138	0.000132345	0.000133519	0.00016673	0.000124353	0.000139192	0.000117983	0.00011414	0.000128475	0.00013282	0.000148619	0.000133529	0.000120471	0.000112609	0.00011742	0.00017516	0.000176265	0.000171123	0.000173313	0.000187467	0.000182301	0.000148866	0.000162919	0.000165718	0.000171721	0.00014695	0.000137781
K00823	4-aminobutyrate aminotransferase [EC:2.6.1.19]	0.000733652	0.000771282	0.000798396	0.000666751	0.000662756	0.000661874	0.000820018	0.000817444	0.000808544	0.00100868	0.00100254	0.0010001	0.0010253	0.00106131	0.000808846	0.000819748	0.000886986	0.000778836	0.000602924	0.000593452	0.000597018	0.000619873	0.000622029	0.000614177	0.000648014	0.000652558	0.000638958	0.000607157	0.000590461	0.000568201	0.000716131	0.00102309	0.000826039	0.000876436	0.000612096	0.000621726
K00824	D-alanine transaminase [EC:2.6.1.21]	2.10499e-05	2.12889e-05	2.29536e-05	3.33648e-05	3.10064e-05	2.96269e-05	4.09125e-05	3.52911e-05	4.04935e-05	2.41093e-05	2.51116e-05	2.3878e-05	3.57312e-05	1.35336e-05	2.56894e-05	1.7072e-05	8.41802e-06	1.99801e-05	2.36211e-05	3.23486e-05	2.45821e-05	2.544e-05	2.00736e-05	2.35053e-05	6.71487e-05	6.87994e-05	6.10663e-05	3.63972e-05	4.58797e-05	5.86922e-05	5.43623e-05	4.48491e-05	4.95873e-05	5.45513e-05	5.01118e-05	3.58158e-05
K00826	branched-chain amino acid aminotransferase [EC:2.6.1.42]	0.000365641	0.000357228	0.000361179	0.000419913	0.000404715	0.000401126	0.000437407	0.000438468	0.000450271	0.000448182	0.000476452	0.000465483	0.000353151	0.000275003	0.000374866	0.000346062	0.000301831	0.000349404	0.000357317	0.000396393	0.000365727	0.000395918	0.000349749	0.000373851	0.000532807	0.000542657	0.000508099	0.000454827	0.000493397	0.000525389	0.000428035	0.00038409	0.00042457	0.000433652	0.000480039	0.000419533
K00830	alanine-glyoxylate transaminase / serine-glyoxylate transaminase / serine-pyruvate transaminase [EC:2.6.1.44 2.6.1.45 2.6.1.51]	9.12289e-05	0.000103411	0.000106031	0.000136708	0.000123881	0.00011586	0.000110083	0.000103693	0.000112259	0.000141722	0.000144598	0.00013732	0.000164958	0.000153786	0.000121698	0.000126218	0.000141202	0.000105229	4.51205e-05	6.35308e-05	4.70641e-05	8.43492e-05	6.77487e-05	7.54784e-05	6.03967e-05	6.4626e-05	6.10684e-05	7.71323e-05	9.59135e-05	0.000104928	8.7334e-05	0.000139679	0.000105686	0.00015298	8.59125e-05	7.65698e-05
K00831	phosphoserine aminotransferase [EC:2.6.1.52]	4.22467e-05	4.15392e-05	4.8041e-05	6.00174e-05	5.80036e-05	5.56327e-05	8.55239e-05	9.01009e-05	8.6231e-05	0.000147471	0.000159479	0.000152794	7.15866e-05	3.0292e-05	0.000102826	3.20611e-05	2.9985e-05	3.40375e-05	4.50211e-05	5.18674e-05	5.09796e-05	7.59737e-05	4.33609e-05	5.53991e-05	0.000120819	0.000126366	0.000108956	0.000137055	0.000144934	0.00013301	6.64424e-05	7.17556e-05	7.91443e-05	4.23906e-05	7.12551e-05	5.35345e-05
K00832	aromatic-amino-acid transaminase [EC:2.6.1.57]	0.000244672	0.000239979	0.000230038	0.000217543	0.000229488	0.000232408	0.000175501	0.000183544	0.000174344	0.00021758	0.000217777	0.000216738	0.000186331	0.000225455	0.000209351	0.000239765	0.000229821	0.000263772	0.000281269	0.000253498	0.000280203	0.000191974	0.000253706	0.000224251	0.000138319	0.000129066	0.000154173	0.000154178	0.000123771	9.57284e-05	0.000198813	0.000155664	0.000169657	0.000139735	0.000172031	0.000214633
K00833	adenosylmethionine-8-amino-7-oxononanoate aminotransferase [EC:2.6.1.62]	0.000222748	0.000222039	0.000230503	0.000275723	0.000264783	0.000258487	0.000273166	0.000280418	0.000282332	0.000281989	0.000285817	0.000275874	0.00023219	0.000178935	0.000284535	0.000192067	0.000200129	0.000174111	0.000210855	0.000218072	0.000226086	0.000294603	0.000219636	0.000251253	0.00032495	0.000339032	0.000305651	0.000352587	0.000372112	0.000379401	0.000244199	0.000219312	0.000240392	0.000183642	0.000284714	0.000239318
K00835	valine--pyruvate aminotransferase [EC:2.6.1.66]	9.35046e-07	1.61437e-06	1.7105e-06	7.5758e-06	7.20982e-06	7.17613e-06	4.28407e-06	6.89976e-06	4.39086e-06	1.26926e-05	1.41619e-05	1.3302e-05	4.42123e-08	9.78136e-07	3.93651e-06	6.45769e-07	3.11818e-06	1.91462e-10	1.29708e-06	9.78363e-07	1.12727e-06	1.9363e-05	8.75835e-06	1.2905e-05	3.98542e-06	4.42006e-06	4.54881e-06	3.11667e-05	3.30455e-05	3.37704e-05	1.3143e-06	1.25427e-06	1.44913e-06	1.08012e-06	2.7902e-06	2.65646e-06
K00836	diaminobutyrate-2-oxoglutarate transaminase [EC:2.6.1.76]	0.000100513	0.000103296	0.000107182	0.000134798	0.00012987	0.000122072	8.81487e-05	9.00595e-05	9.01192e-05	0.000154234	0.000152998	0.000152512	0.000118778	0.000112137	0.000142702	0.000113367	0.000124609	9.95017e-05	7.58299e-05	8.31569e-05	8.16526e-05	0.000108304	9.40414e-05	9.76824e-05	5.0264e-05	5.26834e-05	5.47296e-05	0.000117027	0.000123638	0.000116206	8.25232e-05	8.37192e-05	7.90905e-05	8.19045e-05	7.64631e-05	7.853e-05
K00837	[EC:2.6.1.-]	0.00106243	0.00108274	0.00108067	0.000974089	0.000983779	0.00100348	0.00111162	0.00109486	0.00109189	0.00104125	0.00101306	0.00102629	0.00120227	0.00123215	0.00102729	0.00109776	0.00111094	0.00112599	0.00108762	0.00107348	0.00106656	0.00100301	0.00105827	0.00103448	0.00108934	0.00107965	0.00109288	0.00100182	0.000984516	0.000989637	0.00111722	0.00125186	0.00116667	0.00122592	0.00104184	0.00106631
K00839	aminotransferase [EC:2.6.1.-]	0.000488221	0.000494456	0.000479516	0.000455136	0.000464222	0.000473707	0.000438257	0.000430432	0.000423408	0.000395096	0.000370913	0.000394498	0.000493899	0.000557418	0.000429792	0.000538276	0.000543967	0.000559606	0.000508198	0.000509448	0.000487194	0.000484361	0.000538798	0.0005149	0.000371253	0.00035516	0.000402258	0.000444719	0.000444012	0.000462421	0.000507426	0.000516968	0.000497664	0.00058869	0.000441527	0.000493635
K00840	succinylornithine aminotransferase [EC:2.6.1.81]	2.41024e-05	2.47573e-05	2.71928e-05	4.08219e-05	3.89095e-05	3.59819e-05	2.67646e-05	3.20838e-05	2.86102e-05	8.61242e-05	9.37757e-05	9.06417e-05	3.34795e-05	2.56284e-05	3.97413e-05	2.79145e-05	2.50221e-05	3.05318e-05	1.71751e-05	2.28181e-05	2.00772e-05	2.98878e-05	2.02228e-05	2.35903e-05	9.95968e-06	1.09132e-05	1.17549e-05	5.93658e-05	6.73246e-05	6.14856e-05	1.75929e-05	2.24327e-05	2.0407e-05	2.02609e-05	1.39779e-05	1.41016e-05
K00841	aminotransferase [EC:2.6.1.-]	0.000113496	0.000119662	0.000129314	0.000103482	9.97364e-05	9.86079e-05	0.000119964	0.000119129	0.000116421	0.000143789	0.000138491	0.000145815	0.00014805	0.00014062	9.39827e-05	0.000123556	0.000134955	0.000105978	7.24702e-05	9.14887e-05	6.82563e-05	0.000111913	9.12869e-05	0.00010185	9.94895e-05	9.95679e-05	9.99852e-05	0.000139897	0.000164085	0.000183774	0.000120576	0.000168769	0.000136453	0.000191956	0.000106197	9.86118e-05
K00842	aminotransferase [EC:2.6.1.-]	2.72611e-08	2.61024e-08	3.3716e-08	2.35432e-07	3.88793e-07	2.66573e-07	4.71992e-08	7.87563e-08	3.23361e-08	1.55535e-06	7.79691e-07	1.28675e-06	2.61137e-08	0	1.09568e-07	3.60879e-08	6.1526e-08	1.5535e-10	4.76404e-09	2.51266e-09	6.10393e-09	2.68697e-07	1.83437e-07	1.49931e-07	4.97543e-09	4.73599e-09	7.91602e-09	1.7506e-07	1.19116e-07	1.4433e-09	5.59066e-09	1.41931e-08	6.98675e-09	3.53531e-08	8.63442e-08	2.02878e-07
K00843	[EC:2.6.-.-]	2.76244e-06	3.70131e-06	3.4371e-06	9.80284e-06	8.58193e-06	8.02528e-06	1.67992e-06	1.76953e-06	2.22289e-06	2.24517e-06	3.07465e-06	1.62591e-06	1.84974e-07	2.44557e-07	1.89295e-06	1.01779e-06	4.61412e-07	6.47668e-07	2.3756e-06	2.25708e-06	2.70879e-06	3.37843e-06	2.98263e-06	3.30061e-06	1.92994e-06	2.0606e-06	1.67759e-06	4.71618e-07	2.53395e-07	2.73579e-07	2.03652e-07	1.28992e-07	2.37408e-07	5.44106e-07	2.12359e-06	1.50517e-06
K00844	hexokinase [EC:2.7.1.1]	4.50618e-07	2.01417e-07	2.54814e-07	1.00153e-06	1.17303e-06	9.17717e-07	4.06784e-08	5.56164e-11	8.28069e-09	2.46444e-06	1.03878e-06	1.77712e-06	0	0	3.88277e-08	4.24888e-08	7.12413e-09	7.03043e-11	5.1421e-08	5.05605e-08	1.02548e-07	5.17916e-07	3.89377e-07	3.77706e-07	0	0	0	2.41848e-07	1.64039e-07	1.04368e-10	8.81236e-08	3.94687e-07	1.97753e-07	6.12567e-08	8.14765e-08	2.60736e-07
K00845	glucokinase [EC:2.7.1.2]	0.000768393	0.000755984	0.000747673	0.000693063	0.000708186	0.000704564	0.000597827	0.000585392	0.000582973	0.000472694	0.000462268	0.000469807	0.000585749	0.000609437	0.000674131	0.000727655	0.000771414	0.000652906	0.000727153	0.000689302	0.000710525	0.000642446	0.000710675	0.000687004	0.000602884	0.000592249	0.000615711	0.000542315	0.00050785	0.000494251	0.000649157	0.000551351	0.000602278	0.000563763	0.000660862	0.000721597
K00846	ketohexokinase [EC:2.7.1.3]	1.8938e-10	0	3.01077e-10	1.53929e-10	1.77585e-10	0	0	5.02054e-11	3.64791e-10	0	0	0	0	0	5.19285e-08	1.40768e-10	6.43102e-09	6.34643e-11	2.32521e-10	4.85069e-11	0	0	0	0	3.39266e-11	0	0	0	0	9.42143e-11	0	4.81266e-10	7.41629e-10	4.21485e-11	0	4.07421e-10
K00847	fructokinase [EC:2.7.1.4]	0.000343804	0.000348498	0.000359013	0.000259511	0.000267675	0.000270161	0.000312191	0.000306334	0.000304301	0.000281462	0.000264962	0.000271973	0.000371299	0.000397689	0.000319884	0.00034036	0.000370265	0.000310997	0.000310004	0.000287423	0.000306286	0.000236396	0.000283329	0.000263952	0.000269084	0.00026616	0.000267022	0.000162717	0.000133462	0.000117367	0.000299672	0.000368959	0.000317147	0.000306689	0.000270976	0.000287577
K00848	rhamnulokinase [EC:2.7.1.5]	1.82199e-06	1.76213e-06	2.54805e-06	1.22604e-05	1.1659e-05	1.06668e-05	7.04346e-06	7.69694e-06	6.13523e-06	9.02975e-07	4.23783e-07	1.20407e-06	9.12993e-06	8.41687e-07	1.30427e-05	1.24619e-06	2.54483e-06	1.09224e-07	6.9656e-07	5.99186e-07	7.74988e-07	2.71336e-06	2.41393e-06	2.95968e-06	6.75358e-07	7.0843e-07	1.18012e-06	1.42008e-07	7.83225e-07	9.28112e-08	4.82715e-07	8.98775e-07	7.88124e-07	7.06851e-07	8.13576e-07	8.59196e-07
K00849	galactokinase [EC:2.7.1.6]	8.61496e-05	9.14873e-05	0.00010763	3.76796e-05	3.57298e-05	3.53974e-05	6.70709e-05	7.11793e-05	6.83058e-05	0.000102265	9.64153e-05	9.92412e-05	0.000102965	0.0001105	0.000105809	7.78208e-05	0.000110676	4.68371e-05	2.36921e-05	2.64346e-05	2.33508e-05	2.00317e-05	1.66384e-05	2.10878e-05	1.93466e-05	1.98646e-05	1.74817e-05	6.80849e-06	7.4257e-06	4.14641e-06	2.49746e-05	0.000104945	5.49077e-05	8.89736e-05	3.04639e-05	2.89443e-05
K00850	6-phosphofructokinase [EC:2.7.1.11]	0.000616154	0.00060875	0.000589246	0.000663135	0.000669317	0.000662938	0.000592557	0.000572209	0.000577808	0.000505853	0.000495922	0.000509627	0.000599435	0.000597713	0.000648328	0.000653802	0.00066454	0.000640966	0.000629184	0.000626474	0.000614394	0.000652872	0.000667742	0.000660808	0.000601512	0.000597465	0.000615301	0.000655125	0.000664635	0.000682674	0.000668977	0.000587657	0.000637414	0.000622316	0.000634691	0.000666579
K00851	gluconokinase [EC:2.7.1.12]	6.92362e-05	6.84445e-05	7.69889e-05	6.88427e-05	6.72009e-05	6.07293e-05	5.0092e-05	4.60546e-05	4.68228e-05	5.76492e-05	5.7563e-05	5.86595e-05	5.96351e-05	2.90037e-05	6.93633e-05	5.10761e-05	6.1149e-05	2.46201e-05	3.52951e-05	3.83269e-05	3.59582e-05	2.68521e-05	2.70137e-05	2.98803e-05	4.93299e-05	5.07338e-05	4.54677e-05	3.12948e-05	3.83997e-05	3.25386e-05	4.15871e-05	4.2132e-05	4.43717e-05	3.40389e-05	4.44116e-05	4.39893e-05
K00852	ribokinase [EC:2.7.1.15]	0.000359208	0.000370636	0.000377534	0.000309838	0.000311165	0.000317098	0.000349965	0.000346936	0.000339287	0.000377405	0.000362311	0.000381015	0.000430375	0.000452932	0.000364768	0.000393068	0.000422082	0.000390082	0.00031737	0.000326552	0.0003032	0.000316408	0.000335567	0.000329532	0.000278567	0.00027101	0.000290375	0.00031064	0.000311988	0.000316209	0.000341943	0.000445875	0.000381091	0.000469638	0.000301492	0.00032607
K00853	L-ribulokinase [EC:2.7.1.16]	1.48715e-05	1.41558e-05	1.59089e-05	1.72471e-05	1.70841e-05	1.5483e-05	2.3912e-06	3.29428e-06	1.4334e-06	2.89752e-06	1.69936e-06	3.32484e-06	1.66373e-06	1.04068e-08	2.18849e-05	9.7702e-06	1.59141e-05	3.87946e-07	3.30419e-06	3.25093e-06	2.55184e-06	5.36377e-06	4.61279e-06	6.05727e-06	8.28876e-07	5.48569e-07	8.26903e-07	5.43598e-07	4.0182e-07	3.30324e-07	9.15341e-07	1.8872e-06	1.66422e-06	3.83593e-06	5.17536e-06	6.94913e-06
K00854	xylulokinase [EC:2.7.1.17]	0.000442594	0.000424355	0.000411537	0.00044108	0.000456159	0.000451293	0.000321761	0.000352512	0.000325131	0.000476078	0.000529171	0.000523017	0.000300459	0.000343963	0.000369833	0.000431809	0.000413122	0.000451639	0.000418606	0.000371834	0.000407749	0.000322771	0.000415501	0.000374758	0.000219189	0.000203875	0.000241061	0.000255376	0.000205015	0.000182912	0.000325069	0.000250474	0.000269646	0.000235272	0.000288925	0.000359957
K00855	phosphoribulokinase [EC:2.7.1.19]	3.73033e-05	3.66596e-05	4.00612e-05	2.74474e-05	2.42571e-05	3.00414e-05	6.85594e-05	6.05147e-05	6.65257e-05	7.17674e-05	6.92201e-05	7.87778e-05	6.62183e-05	3.56746e-05	2.71438e-05	5.18338e-05	2.78042e-05	7.49319e-05	4.40148e-05	8.84259e-05	3.71261e-05	6.59145e-05	4.41201e-05	5.818e-05	9.92259e-05	9.61277e-05	0.000103075	0.000149546	0.000188368	0.00020992	7.95412e-05	0.000103461	0.000104831	0.000201581	9.19201e-05	7.79703e-05
K00856	adenosine kinase [EC:2.7.1.20]	5.37756e-05	4.9525e-05	5.51636e-05	3.57767e-05	3.20267e-05	3.46858e-05	8.77889e-05	8.419e-05	9.35588e-05	4.0989e-05	4.03691e-05	3.80055e-05	5.76651e-05	2.5246e-05	5.3578e-05	3.26895e-05	1.95005e-05	3.27638e-05	5.83643e-05	6.95383e-05	6.44774e-05	4.94485e-05	3.43955e-05	4.33865e-05	0.000141352	0.000146851	0.00012667	5.36545e-05	6.24743e-05	6.59378e-05	6.57519e-05	6.89041e-05	7.83505e-05	7.11913e-05	0.000106106	7.45125e-05
K00857	thymidine kinase [EC:2.7.1.21]	6.74507e-05	6.85728e-05	6.94927e-05	5.89924e-05	6.06087e-05	5.94912e-05	5.06009e-05	5.09153e-05	4.79445e-05	4.77932e-05	4.46905e-05	4.7051e-05	6.72984e-05	7.54984e-05	6.41341e-05	7.01953e-05	8.08703e-05	5.99507e-05	5.36657e-05	4.7081e-05	5.15435e-05	4.46165e-05	5.55839e-05	5.09579e-05	2.7658e-05	2.6059e-05	3.0825e-05	2.42956e-05	1.72759e-05	1.38166e-05	4.69953e-05	5.73362e-05	4.71289e-05	4.9563e-05	4.00461e-05	5.01808e-05
K00858	NAD+ kinase [EC:2.7.1.23]	0.000332533	0.000338601	0.000342604	0.000359166	0.000349346	0.000347006	0.0003544	0.000352376	0.000357631	0.000381411	0.000378667	0.000380703	0.000376728	0.000368194	0.000354879	0.000352407	0.000357973	0.000345315	0.000304557	0.00032489	0.000305523	0.000349042	0.000325717	0.000336602	0.000332207	0.000335013	0.000332039	0.000360799	0.000379462	0.00038902	0.000334533	0.000374681	0.00035438	0.00040168	0.000343337	0.000331674
K00859	dephospho-CoA kinase [EC:2.7.1.24]	0.000185374	0.000194718	0.000197809	0.000204385	0.000201989	0.000197505	0.000194867	0.000197924	0.000191085	0.000246632	0.000250235	0.000246877	0.000231356	0.00023705	0.000223115	0.000201609	0.00022809	0.000183722	0.000151559	0.000145205	0.000149583	0.000193859	0.000177184	0.000182055	0.00015408	0.000156017	0.000154437	0.000202625	0.000201238	0.000198166	0.00017895	0.000224594	0.000193676	0.000186106	0.000154095	0.000161107
K00860	adenylylsulfate kinase [EC:2.7.1.25]	8.60418e-05	8.61444e-05	9.73462e-05	5.97869e-05	5.75586e-05	5.88731e-05	0.000155231	0.000147137	0.00015659	0.000108565	0.000105761	0.000102435	0.000144148	0.000102684	0.00010831	7.00505e-05	6.7274e-05	5.779e-05	8.16523e-05	8.50629e-05	8.92167e-05	7.15142e-05	5.37147e-05	6.17633e-05	0.000215192	0.000224492	0.000190033	8.18705e-05	8.44218e-05	8.91601e-05	0.000136261	0.000162289	0.000152134	0.000112329	0.0001452	0.000104372
K00862	erythritol kinase [EC:2.7.1.27]	1.30522e-06	9.20437e-07	7.46031e-07	3.29478e-06	3.17925e-06	2.98031e-06	1.67359e-06	2.81866e-06	2.17039e-06	9.82211e-06	1.24997e-05	1.18043e-05	0	1.55782e-07	1.63012e-06	1.92435e-06	3.12319e-07	3.21199e-06	4.93328e-08	1.80857e-08	4.31742e-08	3.37417e-07	6.52113e-07	4.47733e-07	1.10563e-07	3.40716e-08	5.69493e-08	9.85598e-07	6.03277e-07	4.27732e-07	9.02092e-08	3.40359e-08	1.00704e-07	5.08472e-08	2.36617e-07	4.50225e-07
K00863	dihydroxyacetone kinase [EC:2.7.1.29]	4.51577e-05	4.35439e-05	4.31612e-05	6.26816e-05	6.32554e-05	6.07272e-05	3.26491e-05	3.62199e-05	3.1074e-05	2.9919e-05	2.89507e-05	3.26209e-05	2.98384e-05	3.43107e-05	5.93855e-05	4.26499e-05	4.67676e-05	4.07068e-05	4.26111e-05	3.6798e-05	4.19238e-05	3.71827e-05	4.60729e-05	4.26025e-05	2.3363e-05	2.1906e-05	2.54924e-05	1.89101e-05	1.26498e-05	1.05342e-05	3.11203e-05	2.52224e-05	2.65111e-05	2.3062e-05	3.16204e-05	3.77133e-05
K00864	glycerol kinase [EC:2.7.1.30]	0.00097377	0.000958542	0.000941088	0.000897389	0.000928043	0.000929568	0.00076717	0.000832838	0.000775735	0.00109309	0.00116304	0.00116097	0.000786515	0.000986986	0.000859199	0.000990826	0.000975317	0.00103915	0.000915129	0.000806724	0.000897605	0.000689648	0.000895236	0.000800589	0.000494685	0.000462947	0.000536868	0.000469096	0.000334342	0.000279886	0.000733643	0.000747933	0.000677645	0.000652615	0.000627542	0.000766954
K00865	glycerate kinase [EC:2.7.1.31]	0.000242776	0.000235482	0.000229981	0.000235187	0.000242777	0.000241316	0.000166117	0.000179399	0.000167666	0.000177383	0.000182901	0.000185796	0.000145729	0.000187886	0.000227163	0.000224449	0.000232667	0.000221695	0.000239721	0.000212062	0.000235821	0.000198535	0.000236042	0.000220136	0.000136041	0.000129654	0.000145852	0.000147196	0.000124415	0.000119573	0.000178788	0.000138279	0.000149345	0.000128721	0.000176428	0.000206136
K00867	type I pantothenate kinase [EC:2.7.1.33]	4.45472e-07	2.39469e-07	6.37622e-07	1.28794e-06	1.33815e-06	9.35938e-07	5.13939e-08	5.50406e-08	4.0979e-07	7.40018e-08	3.32829e-07	2.29361e-07	8.92199e-08	1.50127e-09	4.19118e-05	2.61213e-07	7.05038e-06	1.10624e-07	6.73692e-08	8.15629e-08	5.00936e-08	2.73196e-07	2.69604e-07	3.318e-07	5.08765e-08	0	8.70312e-09	7.01874e-08	9.45895e-09	1.42821e-07	6.37442e-08	6.04574e-08	4.06113e-07	7.06866e-08	1.63297e-07	1.97892e-07
K00868	pyridoxine kinase [EC:2.7.1.35]	0.000197869	0.000197499	0.000192118	0.000188603	0.000196952	0.000196584	0.000158232	0.000166011	0.00015622	0.000185787	0.000186738	0.000190707	0.000173579	0.000219228	0.000198354	0.000203915	0.000209477	0.000215447	0.000201032	0.000174983	0.000196705	0.00015726	0.000200423	0.000180103	0.00010802	0.000101253	0.00011824	0.000102363	7.1778e-05	5.95815e-05	0.000159985	0.000164403	0.000149151	0.000140912	0.000134589	0.000165725
K00869	mevalonate kinase [EC:2.7.1.36]	7.54788e-05	8.90743e-05	0.000104348	2.98504e-05	2.52834e-05	3.11315e-05	0.000113954	0.00011069	0.000110157	0.000182041	0.000173668	0.000184192	0.000180317	0.000178594	7.30178e-05	0.000106937	0.000115321	0.000110858	3.22586e-05	6.75796e-05	2.55152e-05	6.35389e-05	4.33578e-05	5.44922e-05	7.12405e-05	6.93137e-05	7.35793e-05	0.000117298	0.000146666	0.00015936	8.97429e-05	0.00021936	0.000147603	0.000256637	6.63955e-05	5.75728e-05
K00870	protein kinase [EC:2.7.1.37]	9.01352e-06	9.80717e-06	1.11154e-05	6.83085e-06	6.21421e-06	7.26879e-06	1.66484e-05	1.61083e-05	1.59588e-05	2.36395e-05	2.32974e-05	2.50639e-05	1.96625e-05	1.51444e-05	1.05379e-05	1.30125e-05	1.13441e-05	1.64999e-05	7.48838e-06	1.53996e-05	6.01144e-06	1.629e-05	9.49425e-06	1.31058e-05	1.78465e-05	1.73861e-05	1.87866e-05	3.60264e-05	4.34903e-05	4.73884e-05	1.61411e-05	2.70425e-05	2.30412e-05	4.20759e-05	1.61498e-05	1.39869e-05
K00872	homoserine kinase [EC:2.7.1.39]	0.00028903	0.000292763	0.000286115	0.000274065	0.000281905	0.000279418	0.0002321	0.000233455	0.000225565	0.00024332	0.000238491	0.000242339	0.000279738	0.000332786	0.00029266	0.000309274	0.000336643	0.000293506	0.000267707	0.00023375	0.000259677	0.000216829	0.00027377	0.000246505	0.000157315	0.000150555	0.000168985	0.0001317	9.81263e-05	8.7291e-05	0.000242928	0.000256168	0.00022851	0.000214294	0.000198122	0.000240706
K00873	pyruvate kinase [EC:2.7.1.40]	0.000665567	0.000677082	0.000683254	0.000694148	0.000686124	0.000679869	0.000728253	0.000716917	0.000722541	0.000761571	0.000758473	0.000753196	0.000778246	0.000740243	0.000733792	0.000698942	0.000715303	0.000668257	0.000634333	0.000649429	0.000636789	0.000671732	0.000646774	0.000654339	0.000722899	0.000730308	0.000712273	0.000700414	0.000721195	0.000719477	0.000712164	0.000765988	0.000737823	0.000732684	0.000687891	0.000671378
K00874	2-dehydro-3-deoxygluconokinase [EC:2.7.1.45]	0.000261686	0.000262647	0.000252838	0.000241985	0.000251295	0.000252228	0.000188533	0.000189095	0.000181423	0.000150401	0.000140542	0.000145172	0.000218832	0.000266171	0.000233628	0.000263178	0.000284623	0.000256332	0.000266674	0.000231399	0.000258399	0.000208024	0.000266349	0.000239894	0.000138209	0.000129747	0.000152674	0.000124969	9.19825e-05	8.38467e-05	0.00021695	0.000195584	0.000189325	0.00017195	0.000182913	0.000226562
K00875	D-ribulokinase [EC:2.7.1.47]	1.29178e-08	6.49277e-09	1.25234e-08	0	0	7.17803e-10	1.16987e-08	0	1.97482e-09	0	3.95739e-07	1.3421e-07	3.05801e-07	5.14559e-09	5.58262e-07	0	0	1.40691e-07	4.39808e-09	9.83172e-09	0	0	0	0	0	0	0	6.44523e-08	0	7.01742e-08	1.97453e-08	9.10303e-09	4.54153e-08	3.13938e-08	1.66931e-07	1.14382e-07
K00876	uridine kinase [EC:2.7.1.48]	0.000481	0.000479561	0.000451077	0.000501554	0.000515739	0.000509972	0.000340427	0.000335733	0.000326314	0.000243259	0.000224911	0.000230418	0.000369814	0.000460281	0.000418335	0.000497607	0.000530968	0.000466301	0.000495109	0.000427718	0.000481321	0.000407921	0.000514235	0.000463887	0.000256288	0.00024195	0.000285545	0.000220489	0.000150409	0.000125043	0.000393429	0.000302636	0.000327883	0.000273424	0.000351851	0.000439476
K00878	hydroxyethylthiazole kinase [EC:2.7.1.50]	0.000327443	0.000328571	0.000329125	0.000322195	0.000321543	0.000321302	0.000334683	0.000328095	0.000331305	0.000331154	0.000327033	0.000336351	0.000349232	0.000354105	0.000303217	0.000353722	0.000351154	0.000345185	0.000307752	0.000322637	0.00030099	0.000310811	0.000316835	0.000315652	0.000325692	0.000323612	0.000327827	0.000315789	0.000325895	0.000342447	0.000343538	0.000365545	0.000349731	0.00040708	0.00033597	0.00033625
K00879	L-fuculokinase [EC:2.7.1.51]	7.19189e-09	0	2.30732e-08	4.53841e-07	4.3598e-07	4.0359e-07	2.79566e-07	5.24314e-07	2.02852e-07	2.21676e-08	7.18679e-09	1.03492e-07	1.74122e-07	0	2.36439e-06	2.15245e-07	3.0528e-07	0	2.64831e-08	3.25633e-08	4.00154e-09	1.15347e-07	1.35811e-07	1.46704e-07	3.59065e-08	3.15788e-08	6.2912e-08	7.42664e-09	7.55593e-09	8.08596e-09	8.21196e-08	1.41565e-07	1.74584e-07	4.34089e-08	1.9468e-07	2.08784e-07
K00880	L-xylulokinase [EC:2.7.1.53]	2.56378e-05	2.085e-05	1.86839e-05	4.67118e-05	4.57229e-05	4.33606e-05	2.54433e-05	3.90744e-05	3.10741e-05	0.000121304	0.000149499	0.000143763	5.8423e-06	8.69338e-06	2.54389e-05	3.19603e-05	1.3118e-05	4.58208e-05	9.08115e-06	7.65046e-06	8.54723e-06	1.04654e-05	1.60276e-05	1.29285e-05	5.61291e-06	4.35845e-06	5.41523e-06	1.47035e-05	9.63982e-06	6.44601e-06	7.28431e-06	5.2602e-06	6.55949e-06	5.25728e-06	7.30406e-06	1.24743e-05
K00881	allose kinase [EC:2.7.1.55]	7.48271e-10	0	9.38497e-09	9.48342e-10	0	0	0	1.98369e-10	1.44135e-09	0	2.64285e-09	9.06141e-10	0	0	7.67042e-07	0	2.541e-08	2.50757e-10	5.79483e-09	8.59632e-09	0	0	0	0	0	0	0	4.55175e-10	0	1.26423e-09	1.64695e-08	1.1994e-08	4.43964e-08	5.65579e-10	1.1789e-09	2.39186e-08
K00882	1-phosphofructokinase [EC:2.7.1.56]	0.000502541	0.000497396	0.000470618	0.00046906	0.000491079	0.000496161	0.000366727	0.00037187	0.000356298	0.000312561	0.000304694	0.000309851	0.000369786	0.000469993	0.000430606	0.000502897	0.000511992	0.000517219	0.000556534	0.000494122	0.000540574	0.000424042	0.000543761	0.000488842	0.000302162	0.000282453	0.00033362	0.000293335	0.000230683	0.00021097	0.000436619	0.000346468	0.000370569	0.000335081	0.000380387	0.000467003
K00883	2-dehydro-3-deoxygalactonokinase [EC:2.7.1.58]	2.06102e-07	1.01469e-07	7.16927e-08	3.85841e-08	3.11049e-08	1.34698e-07	1.82828e-07	1.11915e-09	3.89943e-08	0	6.66058e-07	2.05312e-07	4.77908e-06	8.04156e-08	4.71191e-06	0	1.43357e-07	2.20014e-06	2.11974e-08	1.75851e-08	0	6.30374e-09	1.19956e-08	1.78447e-08	0	0	2.83719e-09	5.68061e-08	0	6.35941e-08	3.35124e-08	4.38738e-08	1.09932e-07	2.845e-08	1.5209e-07	2.02972e-07
K00884	N-acetylglucosamine kinase [EC:2.7.1.59]	6.29204e-05	6.20177e-05	5.83215e-05	5.49286e-05	5.84025e-05	5.9429e-05	4.41965e-05	4.39475e-05	4.25779e-05	3.00056e-05	2.76359e-05	2.88489e-05	4.59983e-05	6.11547e-05	5.45715e-05	6.2819e-05	6.49422e-05	6.4839e-05	7.11739e-05	6.13148e-05	6.90656e-05	5.28746e-05	6.94577e-05	6.17608e-05	3.70801e-05	3.4539e-05	4.10638e-05	3.12941e-05	2.08577e-05	1.78112e-05	5.44894e-05	4.23625e-05	4.56711e-05	3.82611e-05	4.70867e-05	5.89344e-05
K00885	N-acylmannosamine kinase [EC:2.7.1.60]	8.91721e-08	7.96561e-08	1.22776e-07	8.2522e-07	7.80167e-07	7.09856e-07	3.04076e-07	5.39803e-07	2.17398e-07	4.7489e-08	5.34287e-08	1.60709e-07	1.96031e-07	2.86443e-10	2.20822e-06	2.30934e-07	4.13328e-07	8.81367e-09	3.02269e-08	3.04244e-08	2.08335e-08	1.97938e-07	2.07096e-07	2.28076e-07	3.52081e-08	3.24649e-08	6.22577e-08	2.00128e-08	1.09251e-08	2.01569e-08	6.95012e-08	1.25386e-07	1.40391e-07	5.21928e-08	2.16717e-07	2.02581e-07
K00886	polyphosphate glucokinase [EC:2.7.1.63]	3.20926e-07	1.01331e-07	3.95319e-07	5.64748e-07	4.45008e-07	3.56811e-07	3.34766e-08	4.78151e-08	3.53542e-07	2.90303e-08	4.59184e-08	5.92747e-08	3.83055e-07	6.4455e-09	3.33903e-05	4.76779e-08	6.12483e-06	2.36676e-07	1.86349e-08	4.90968e-08	2.74134e-08	9.95867e-08	9.13285e-08	1.08689e-07	6.75258e-09	0	0	8.73775e-09	3.71067e-09	7.92467e-08	1.41801e-08	5.34801e-08	2.48733e-07	4.04562e-08	9.40608e-09	2.1584e-08
K00891	shikimate kinase [EC:2.7.1.71]	0.000274848	0.000277595	0.000282917	0.000276628	0.000269631	0.000271429	0.000299473	0.000299254	0.000303839	0.000320131	0.000316388	0.000321883	0.000302623	0.000298204	0.000271547	0.000287958	0.000282937	0.000290577	0.000256858	0.00028468	0.000256731	0.000313929	0.000281485	0.00029617	0.00029515	0.000296905	0.000295355	0.000338987	0.000367949	0.000389027	0.000293733	0.000326434	0.000310515	0.000373086	0.000303931	0.000285388
K00892	inosine kinase [EC:2.7.1.73]	0	0	3.40905e-08	1.26917e-07	8.49463e-08	8.77185e-08	0	0	0	0	0	0	0	0	3.85018e-06	0	0	0	3.79087e-08	3.58101e-08	0	5.95864e-08	1.13389e-07	1.68678e-07	0	0	2.68187e-08	0	0	0	7.19185e-08	7.84624e-08	2.09807e-07	0	4.69114e-08	1.23851e-07
K00895	pyrophosphate--fructose-6-phosphate 1-phosphotransferase [EC:2.7.1.90]	0.000111593	0.000102642	0.00011695	9.2859e-05	8.80549e-05	8.98343e-05	0.000232878	0.000224439	0.000242562	0.000120938	0.000126198	0.000114906	0.000137057	5.66801e-05	0.000118966	6.16174e-05	4.03941e-05	4.00321e-05	0.000131325	0.000139226	0.000148172	0.000140377	8.39831e-05	0.000109845	0.000389719	0.000408571	0.000342701	0.000185456	0.000187077	0.000195935	0.000190934	0.000170226	0.00019937	0.000115541	0.000263141	0.000178899
K00897	aminoglycoside 3'-phosphotransferase [EC:2.7.1.95]	1.22594e-06	1.20719e-06	1.53936e-06	5.50184e-06	5.26655e-06	4.54308e-06	2.72711e-07	4.86115e-09	8.73181e-08	3.70398e-07	9.18691e-08	6.06384e-07	8.50986e-07	1.43192e-08	4.34365e-06	2.82275e-07	6.22684e-07	3.97661e-07	1.94115e-07	5.6987e-08	2.50732e-07	1.27063e-06	1.16526e-06	1.38676e-06	7.57512e-09	0	0	7.53127e-08	4.73445e-08	1.28797e-08	2.87528e-08	6.45148e-09	5.498e-08	3.97613e-08	2.6326e-08	1.41101e-07
K00899	5-methylthioribose kinase [EC:2.7.1.100]	5.50801e-05	5.11404e-05	4.82392e-05	8.51889e-05	8.57128e-05	8.18297e-05	4.69679e-05	5.73014e-05	4.90306e-05	0.000101336	0.000116842	0.000117041	3.30829e-05	4.23832e-05	4.90413e-05	5.88406e-05	4.61639e-05	6.8432e-05	4.89462e-05	4.19574e-05	4.7845e-05	4.41362e-05	5.66966e-05	5.05943e-05	2.62706e-05	2.45158e-05	2.83884e-05	3.69924e-05	3.33801e-05	3.53898e-05	4.6284e-05	3.38006e-05	3.54141e-05	2.73281e-05	3.55784e-05	4.34062e-05
K00901	diacylglycerol kinase [EC:2.7.1.107]	0.000160827	0.000160286	0.000153428	0.000173751	0.000177411	0.000175237	0.00012243	0.000128009	0.000121407	0.00013484	0.000136085	0.000134321	0.000123904	0.000151755	0.000143305	0.000162701	0.000171612	0.000158828	0.000165533	0.000147837	0.000164663	0.000171368	0.000179268	0.000173604	9.2942e-05	9.05511e-05	0.000102894	0.000154555	0.000143648	0.000137418	0.000137499	0.000103933	0.000114607	8.98611e-05	0.000123288	0.000145623
K00903	protein-tyrosine kinase [EC:2.7.10.-]	6.09904e-05	6.17934e-05	7.42077e-05	4.38376e-05	4.1903e-05	4.02112e-05	5.66036e-05	5.92926e-05	5.82791e-05	0.000119964	0.000119682	0.00011225	5.32118e-05	2.06382e-05	5.21192e-05	3.1866e-05	2.37096e-05	2.47131e-05	6.63868e-05	8.13747e-05	7.77728e-05	3.91645e-05	2.50001e-05	3.26872e-05	7.98296e-05	8.32599e-05	7.45524e-05	0.000107649	0.000125388	9.83908e-05	4.42797e-05	4.77684e-05	5.79229e-05	3.07948e-05	5.52267e-05	4.27656e-05
K00906	isocitrate dehydrogenase kinase/phosphatase [EC:2.7.11.5 3.1.3.-]	1.12802e-05	1.20262e-05	1.57191e-05	2.30213e-07	2.31125e-07	3.69574e-07	2.79177e-06	3.16293e-06	2.98664e-06	2.49087e-05	2.22365e-05	1.98147e-05	1.78708e-05	2.99148e-06	1.17557e-05	3.73745e-06	2.43092e-06	6.94608e-06	1.68464e-05	2.22597e-05	2.06584e-05	1.297e-07	1.23405e-07	3.67157e-07	1.85451e-06	1.95579e-06	3.26903e-06	2.38522e-05	3.02842e-05	2.00675e-05	1.87353e-06	2.73604e-06	4.19524e-06	2.30441e-06	2.19538e-06	2.016e-06
K00908	Ca2+/calmodulin-dependent protein kinase [EC:2.7.11.17]	4.64417e-05	4.52052e-05	4.75814e-05	4.37896e-05	4.28093e-05	4.46072e-05	4.70479e-05	5.11061e-05	5.03571e-05	4.92875e-05	4.86698e-05	5.03055e-05	3.31672e-05	3.53725e-05	2.81308e-05	3.91779e-05	3.52068e-05	4.30407e-05	4.8348e-05	5.31332e-05	4.91912e-05	6.04272e-05	4.80037e-05	5.42843e-05	5.13863e-05	5.15759e-05	5.19717e-05	7.77438e-05	8.0464e-05	8.30107e-05	3.60869e-05	4.02035e-05	4.01011e-05	5.66575e-05	5.39965e-05	4.83341e-05
K00912	tetraacyldisaccharide 4'-kinase [EC:2.7.1.130]	6.13423e-05	7.02429e-05	7.11801e-05	9.27532e-05	8.10836e-05	8.26025e-05	0.000110167	0.000111371	0.000117466	0.000100798	0.000113053	9.02958e-05	7.09063e-05	3.04956e-05	6.03978e-05	3.04172e-05	2.33799e-05	2.60354e-05	7.41558e-05	7.86814e-05	8.29718e-05	0.000112906	6.7066e-05	8.62525e-05	0.000176336	0.000185643	0.000157335	0.000149658	0.000155952	0.000159457	9.3038e-05	8.50885e-05	9.98178e-05	5.56706e-05	0.000121799	8.51548e-05
K00917	tagatose 6-phosphate kinase [EC:2.7.1.144]	0.000154134	0.000151438	0.000143442	0.000136673	0.000144797	0.000146698	0.000110337	0.000109435	0.000106437	7.82815e-05	7.16276e-05	7.65632e-05	0.000113636	0.000146717	0.000128312	0.000154392	0.000157799	0.000158188	0.000171816	0.000152941	0.000166045	0.000131602	0.000167906	0.000151494	9.61579e-05	9.03215e-05	0.000105537	9.54343e-05	8.03816e-05	8.13538e-05	0.000143879	0.000113274	0.000120154	0.000110065	0.000121715	0.000146714
K00918	ADP-dependent phosphofructokinase/glucokinase [EC:2.7.1.146 2.7.1.147]	0.000129152	0.000162311	0.00019707	2.15471e-05	1.70299e-05	2.31447e-05	0.000177711	0.000182695	0.000172758	0.00034759	0.000328264	0.000336411	0.000351161	0.000405283	0.000142819	0.000180991	0.000235611	0.000155497	9.85984e-06	1.96617e-05	6.69968e-06	6.3483e-05	4.66816e-05	4.84934e-05	1.03483e-05	1.09849e-05	1.0138e-05	2.9922e-05	3.45485e-05	2.76853e-05	9.02127e-05	0.000384007	0.000194353	0.00029704	8.85037e-06	8.16502e-06
K00919	4-diphosphocytidyl-2-C-methyl-D-erythritol kinase [EC:2.7.1.148]	0.000358199	0.000354771	0.000343076	0.00038338	0.000386445	0.000380737	0.000305239	0.000307856	0.000306144	0.000278901	0.00028206	0.000274716	0.000292315	0.000320926	0.000353666	0.000351377	0.000363971	0.000331346	0.000362439	0.000327732	0.000363687	0.000329292	0.000361919	0.000345288	0.000285622	0.000284801	0.00028988	0.000254378	0.000222565	0.000206191	0.000311636	0.000252779	0.000277287	0.000211562	0.000314176	0.000338865
K00924	[EC:2.7.1.-]	3.70995e-05	3.8913e-05	4.34194e-05	3.12617e-05	3.11761e-05	3.15483e-05	3.31868e-05	3.55117e-05	3.31325e-05	6.23306e-05	6.06259e-05	5.98916e-05	4.03406e-05	3.41726e-05	4.18584e-05	3.20497e-05	3.39217e-05	3.46181e-05	3.96399e-05	4.81709e-05	4.15295e-05	4.35807e-05	3.28899e-05	3.8045e-05	3.01108e-05	2.97951e-05	3.29672e-05	8.52335e-05	9.66949e-05	9.55862e-05	3.66587e-05	4.14886e-05	3.85325e-05	5.12152e-05	3.22526e-05	3.06885e-05
K00925	acetate kinase [EC:2.7.2.1]	0.000492154	0.000490452	0.000475799	0.000535899	0.000537335	0.000528752	0.000402814	0.000414341	0.000406034	0.000391939	0.000397769	0.000388381	0.000373107	0.000427177	0.000467052	0.000472829	0.000497657	0.000439399	0.000483744	0.000438832	0.000486088	0.000498047	0.000510641	0.000501259	0.000362778	0.000362601	0.000373155	0.000418727	0.000389192	0.000378347	0.000425273	0.000335136	0.000372866	0.000278882	0.000419948	0.000453541
K00926	carbamate kinase [EC:2.7.2.2]	0.00019242	0.000202928	0.00021291	0.000158741	0.00015478	0.000157782	0.000211551	0.000209787	0.000206891	0.000275434	0.000281278	0.000280866	0.000246984	0.000232954	0.000168564	0.000204462	0.000208545	0.000192858	0.000150638	0.000171435	0.000143097	0.000156634	0.000147731	0.000153908	0.000199352	0.000198588	0.000195327	0.000211092	0.00023546	0.000248125	0.000205998	0.000285756	0.000241141	0.000293941	0.000179678	0.000173966
K00927	phosphoglycerate kinase [EC:2.7.2.3]	0.000630019	0.000640611	0.000648666	0.000598784	0.000593051	0.000601846	0.000665856	0.000656163	0.000660316	0.000721103	0.000712023	0.000729445	0.000718014	0.000706716	0.000610627	0.000677661	0.000667199	0.000697275	0.000602044	0.000662951	0.000586831	0.000637815	0.000617503	0.000631613	0.000638974	0.000631963	0.000651509	0.000741483	0.000792547	0.00082552	0.000669622	0.000774232	0.000722794	0.000902052	0.000653423	0.000648773
K00928	aspartate kinase [EC:2.7.2.4]	0.000835226	0.000840727	0.000838417	0.000816781	0.000822777	0.000826657	0.000802384	0.00080821	0.000796601	0.0008596	0.000851026	0.000867448	0.000842746	0.000898237	0.000789379	0.000871952	0.000869948	0.000886941	0.000834668	0.000839962	0.00082285	0.000802785	0.000844295	0.000826109	0.000715486	0.000703547	0.00073964	0.000810169	0.000812765	0.000820901	0.000825262	0.000863036	0.000824096	0.000910303	0.000772344	0.000807974
K00929	butyrate kinase [EC:2.7.2.7]	0.000825872	0.000820216	0.000778531	0.000764619	0.000792979	0.000803313	0.000578699	0.00059438	0.00056846	0.000465754	0.000458938	0.000457629	0.00054648	0.000731304	0.000611474	0.000794775	0.000817915	0.000788461	0.000881881	0.000765884	0.000858701	0.000709291	0.000877217	0.00080053	0.000478361	0.000450005	0.000523712	0.000450261	0.000328948	0.000291078	0.000652791	0.000511336	0.000551124	0.000473274	0.000607427	0.000742712
K00930	acetylglutamate kinase [EC:2.7.2.8]	0.000288024	0.000283715	0.000282995	0.000309785	0.00030415	0.000303895	0.000313175	0.0003061	0.000314496	0.000306486	0.00030887	0.000313667	0.000292644	0.000253175	0.000300575	0.000294818	0.000278912	0.000301818	0.000289747	0.000321675	0.000288477	0.000333649	0.000304019	0.000319182	0.000353835	0.00035559	0.000352151	0.000386353	0.000418139	0.000437154	0.00032833	0.000302656	0.000329418	0.000370668	0.000347852	0.000330154
K00931	glutamate 5-kinase [EC:2.7.2.11]	0.000240004	0.000237084	0.000238615	0.000297943	0.000288721	0.000277865	0.000253965	0.000254488	0.000260599	0.000260599	0.000268171	0.000258658	0.000232894	0.000201316	0.000289796	0.00023348	0.000244181	0.000200354	0.000212185	0.000212891	0.000222258	0.00027724	0.000237563	0.000252071	0.000271017	0.00028118	0.000259469	0.000267382	0.000275403	0.000277756	0.000239244	0.000199727	0.000224258	0.00017311	0.000266804	0.00024444
K00932	propionate kinase [EC:2.7.2.15]	4.97655e-06	4.61888e-06	5.24652e-06	2.94644e-06	2.75777e-06	2.70065e-06	2.08229e-06	2.3308e-06	2.59022e-06	9.83514e-07	1.00107e-06	8.94775e-07	1.92808e-07	3.41049e-07	2.82423e-06	2.62563e-06	2.74139e-06	9.09987e-07	2.8209e-06	2.95238e-06	3.0428e-06	1.69925e-06	1.4865e-06	1.89548e-06	2.70879e-06	2.80279e-06	2.39691e-06	2.30677e-07	2.06754e-07	1.69833e-07	3.72396e-07	2.6309e-07	5.36723e-07	1.29301e-06	3.64073e-06	3.04917e-06
K00934	arginine kinase [EC:2.7.3.3]	5.49411e-08	5.46861e-08	6.90931e-08	3.1216e-07	2.97274e-07	2.63356e-07	5.21864e-08	7.716e-08	3.19909e-08	2.02964e-08	1.05764e-09	4.18573e-08	2.56244e-08	0	1.02382e-08	4.11964e-08	4.49261e-08	0	9.34449e-09	3.6246e-09	1.21197e-08	7.20975e-08	6.72729e-08	7.59892e-08	4.7983e-09	4.64725e-09	7.76769e-09	4.30301e-09	3.28927e-09	1.18996e-09	6.12633e-09	1.39271e-08	6.79894e-09	7.9518e-09	2.65966e-08	2.44496e-08
K00936	[EC:2.7.3.-]	0.0095467	0.00933943	0.00953474	0.0093589	0.00918819	0.00936964	0.0106953	0.0108514	0.0109891	0.00965966	0.00975998	0.009698	0.00813798	0.00745002	0.00768331	0.00829461	0.00728538	0.00870678	0.0103532	0.0109688	0.0106083	0.0117875	0.010197	0.010972	0.0132214	0.0134011	0.0128187	0.0130409	0.0136082	0.0137918	0.0101411	0.00953516	0.0105502	0.0102876	0.011986	0.0107398
K00937	polyphosphate kinase [EC:2.7.4.1]	0.000128446	0.000129494	0.000140516	0.000151563	0.000137888	0.00014847	0.000203011	0.000203051	0.000201254	0.000368145	0.000385197	0.000402838	0.000203472	0.000103204	0.000197101	0.000158887	0.00010657	0.000242779	0.000132024	0.000250968	0.000117473	0.000240897	0.000153546	0.000202943	0.000256245	0.000248668	0.000269968	0.000521856	0.000632992	0.000673258	0.00021607	0.000285205	0.00029404	0.000522483	0.000237056	0.000209478
K00938	phosphomevalonate kinase [EC:2.7.4.2]	2.6532e-07	3.17326e-07	3.64904e-07	1.28357e-06	1.44317e-06	1.03962e-06	5.37621e-08	2.22841e-08	4.50691e-08	1.16896e-07	0	1.34623e-07	0	8.5665e-08	2.4303e-06	2.82566e-07	3.21825e-07	2.42985e-09	6.88832e-08	3.48097e-08	7.89589e-08	9.54251e-07	7.82073e-07	8.49224e-07	8.12005e-08	3.74725e-08	1.07288e-08	2.02484e-08	2.47423e-08	1.3002e-08	9.14332e-08	1.06661e-07	1.38714e-07	3.44711e-08	5.42432e-08	8.10839e-08
K00939	adenylate kinase [EC:2.7.4.3]	0.00030427	0.000316353	0.000329723	0.000276818	0.000271802	0.000273937	0.000335279	0.000335445	0.000333465	0.000395517	0.000388283	0.000393895	0.000393533	0.000393197	0.000314099	0.000329157	0.000349432	0.000315999	0.000255981	0.000274401	0.000253518	0.000287661	0.000266183	0.000276216	0.00028713	0.000288541	0.000286559	0.000324632	0.000339856	0.000345443	0.000300315	0.000405112	0.000342102	0.000407994	0.000284719	0.000277156
K00940	nucleoside-diphosphate kinase [EC:2.7.4.6]	9.38439e-05	9.81981e-05	0.000111026	7.53182e-05	6.92257e-05	7.05335e-05	0.000146029	0.000139929	0.000146417	0.000171295	0.00017008	0.000173875	0.000163897	0.000127884	0.000115427	0.000101557	9.71583e-05	9.98636e-05	6.87584e-05	9.96364e-05	6.9994e-05	8.73431e-05	5.98715e-05	7.47574e-05	0.000164467	0.000168748	0.000153855	0.000144732	0.000173525	0.000184779	0.000127742	0.000190676	0.000164053	0.000207973	0.000131603	0.000102765
K00941	hydroxymethylpyrimidine/phosphomethylpyrimidine kinase [EC:2.7.1.49 2.7.4.7]	0.000363611	0.000378756	0.00039311	0.000343717	0.000335332	0.000337665	0.000394035	0.000393538	0.000392206	0.000465936	0.000455867	0.000464244	0.000468744	0.000471644	0.000373999	0.000398655	0.000417801	0.000390693	0.000306983	0.000337285	0.00030273	0.000360557	0.000334375	0.000346455	0.000323773	0.0003234	0.000329045	0.00039091	0.000418214	0.000430228	0.000359291	0.000484443	0.000410026	0.000512848	0.000338895	0.000332548
K00942	guanylate kinase [EC:2.7.4.8]	0.000273085	0.000269135	0.000261377	0.000303983	0.000303782	0.000298429	0.000255623	0.000253386	0.000256025	0.000217954	0.000217817	0.000214973	0.000244623	0.000247195	0.000284441	0.000273859	0.000277504	0.000260366	0.000276419	0.000261917	0.000278256	0.000266009	0.000278985	0.000272339	0.000256579	0.000257963	0.000256649	0.000222995	0.000210044	0.000205127	0.000261362	0.000216719	0.000240295	0.000200807	0.000270635	0.000277341
K00943	dTMP kinase [EC:2.7.4.9]	0.000366856	0.000369595	0.000369417	0.000360171	0.000361178	0.000363781	0.000359487	0.00036504	0.000358515	0.000395103	0.000392904	0.000399628	0.000370235	0.00039463	0.000358761	0.00038148	0.000389601	0.000384952	0.000357611	0.000360413	0.000352702	0.000384027	0.0003761	0.000379351	0.000326891	0.000323932	0.000335757	0.000406188	0.000410996	0.000417151	0.000360542	0.000380622	0.000364502	0.00040011	0.000346745	0.000358577
K00945	cytidylate kinase [EC:2.7.4.14]	0.000286734	0.000294359	0.000306016	0.000276182	0.000270119	0.000269303	0.000303754	0.00030827	0.000305805	0.000370875	0.000374604	0.000373023	0.000329218	0.000325592	0.00028651	0.000295489	0.000310759	0.000276748	0.000234291	0.000249564	0.000233804	0.000280246	0.000248626	0.000263042	0.000271531	0.000274297	0.000268634	0.000317146	0.000333336	0.000341784	0.000269541	0.000340837	0.000298094	0.000344186	0.00027051	0.000259321
K00946	thiamine-monophosphate kinase [EC:2.7.4.16]	0.000177204	0.000190028	0.000212915	0.000141176	0.000126409	0.000135177	0.000307491	0.000289638	0.000306075	0.000342875	0.000329509	0.000343679	0.00035316	0.00027482	0.000236953	0.00021092	0.000200299	0.000223971	0.000146208	0.000229391	0.000144515	0.000231066	0.000152304	0.000191206	0.00035485	0.000362188	0.000339736	0.000386131	0.000466524	0.000504853	0.000291178	0.000424078	0.000371882	0.000508178	0.000291356	0.000229391
K00947	[EC:2.7.4.-]	5.76938e-05	5.8432e-05	6.4229e-05	6.53403e-05	6.03881e-05	6.45714e-05	8.46325e-05	8.90277e-05	8.52181e-05	0.000181718	0.00019246	0.000195802	7.36263e-05	4.23267e-05	5.15554e-05	6.56729e-05	3.88038e-05	9.60246e-05	6.02439e-05	0.000107759	5.67138e-05	0.000113202	6.98375e-05	9.15983e-05	0.000101687	9.89385e-05	0.000108393	0.000244127	0.000291509	0.000304901	9.03175e-05	0.000111859	0.000116412	0.000201174	9.34044e-05	8.24587e-05
K00948	ribose-phosphate pyrophosphokinase [EC:2.7.6.1]	0.000397858	0.000403165	0.000412088	0.000375399	0.00037279	0.000375269	0.000436658	0.000430714	0.000433949	0.000452246	0.000446085	0.000448403	0.000453019	0.000426979	0.000407763	0.000405139	0.000406369	0.000399641	0.000391266	0.000415661	0.000391289	0.000403091	0.000382167	0.000392509	0.000454978	0.000457207	0.000449275	0.000462251	0.00048756	0.000492234	0.000431904	0.000476527	0.000457911	0.000491413	0.000427025	0.000409682
K00949	thiamine pyrophosphokinase [EC:2.7.6.2]	0.000322742	0.000320061	0.000300253	0.000340954	0.000350655	0.000346729	0.000233511	0.000235244	0.000227548	0.0002075	0.000207876	0.000206872	0.000241734	0.000307798	0.000280184	0.000336106	0.000350405	0.000324555	0.000331535	0.000286553	0.000322936	0.000283234	0.000348359	0.000316651	0.000175542	0.000166143	0.000194584	0.00017124	0.000124187	0.000107146	0.000262733	0.00020099	0.000218645	0.000182098	0.000236727	0.000294484
K00950	2-amino-4-hydroxy-6-hydroxymethyldihydropteridine diphosphokinase [EC:2.7.6.3]	0.000146508	0.000144431	0.000142861	0.000153578	0.00015478	0.000151021	0.000124533	0.000124612	0.000124476	0.000120109	0.000119473	0.000117494	0.000124716	0.000124087	0.000154445	0.000139966	0.000147077	0.000128494	0.000144275	0.00013433	0.000146858	0.00013134	0.000139503	0.000135399	0.000119142	0.000119898	0.000119971	0.00011459	0.000106944	9.75047e-05	0.000126842	0.000101568	0.000114129	8.31746e-05	0.00012883	0.000135712
K00951	GTP pyrophosphokinase [EC:2.7.6.5]	0.00101992	0.00100626	0.000975793	0.00110163	0.00111214	0.00109685	0.000981862	0.000979981	0.000977433	0.00088113	0.00089634	0.00087145	0.000927147	0.000919595	0.00108397	0.000996079	0.0010116	0.000953995	0.00106985	0.000978666	0.00107975	0.000989522	0.0010519	0.00101415	0.00103447	0.00104191	0.00101892	0.000849431	0.000772706	0.000729691	0.00101845	0.00082597	0.000922354	0.00065189	0.00100386	0.00103361
K00952	nicotinamide-nucleotide adenylyltransferase [EC:2.7.7.1]	3.34987e-05	3.80482e-05	4.43254e-05	1.64104e-05	1.43611e-05	1.70302e-05	6.66968e-05	6.3244e-05	6.48643e-05	7.86515e-05	7.56511e-05	7.83904e-05	8.38656e-05	7.11336e-05	3.98039e-05	4.24985e-05	4.41108e-05	4.18481e-05	2.16749e-05	3.4734e-05	2.03487e-05	3.51873e-05	2.12785e-05	2.78465e-05	7.13277e-05	7.2946e-05	6.64126e-05	6.48174e-05	7.60365e-05	8.0776e-05	5.53303e-05	0.000101569	7.90453e-05	0.000103985	4.97425e-05	3.82902e-05
K00954	pantetheine-phosphate adenylyltransferase [EC:2.7.7.3]	0.000132903	0.000130126	0.000130964	0.000144979	0.0001435	0.000139565	0.000166134	0.000159561	0.000165026	0.000122775	0.000124928	0.000120372	0.000146659	0.00010958	0.000161454	0.000123337	0.000126542	0.000101424	0.00013051	0.000125539	0.000135112	0.000132092	0.000120515	0.000124889	0.000215419	0.000222673	0.000199111	0.000130876	0.000128835	0.000126597	0.000161401	0.000138007	0.00015729	9.81959e-05	0.000173646	0.000154143
K00955	bifunctional enzyme CysN/CysC [EC:2.7.7.4 2.7.1.25]	0.000122919	0.000126404	0.00013056	0.00012125	0.000120927	0.000123689	0.000145422	0.000148051	0.000143042	0.000156171	0.000155582	0.000150822	0.000135004	0.000111163	0.000152024	9.98965e-05	0.000108499	0.000105252	0.00014017	0.000141496	0.000144325	0.000176533	0.000138225	0.000154422	0.000182901	0.000187062	0.000176645	0.000240019	0.000249602	0.000239344	0.000146913	0.000148207	0.000161121	0.000113557	0.00014438	0.000134112
K00956	sulfate adenylyltransferase subunit 1 [EC:2.7.7.4]	5.65266e-05	6.40755e-05	7.15137e-05	4.58016e-05	4.30744e-05	4.49158e-05	5.78383e-05	6.20292e-05	5.73102e-05	0.000113392	0.00011054	0.000109726	9.29383e-05	9.00749e-05	8.96152e-05	5.74297e-05	7.2238e-05	6.15867e-05	4.22686e-05	5.13455e-05	4.39512e-05	6.25005e-05	4.28801e-05	5.23507e-05	2.99407e-05	3.04609e-05	3.3421e-05	0.000103878	0.000116418	0.00010907	4.52222e-05	9.36477e-05	7.02415e-05	8.35117e-05	3.33003e-05	3.42037e-05
K00957	sulfate adenylyltransferase subunit 2 [EC:2.7.7.4]	5.51555e-05	5.64554e-05	5.86204e-05	5.27695e-05	5.19393e-05	5.40091e-05	4.64252e-05	5.22988e-05	4.77515e-05	6.94129e-05	6.94279e-05	6.77636e-05	4.19469e-05	4.00744e-05	6.50497e-05	4.20196e-05	4.56949e-05	5.04035e-05	5.9838e-05	6.44189e-05	6.14302e-05	8.11427e-05	6.11575e-05	7.06001e-05	4.61513e-05	4.60486e-05	4.9792e-05	0.00011666	0.000125659	0.000121908	4.33944e-05	4.60694e-05	5.08693e-05	5.0716e-05	4.97331e-05	5.00147e-05
K00958	sulfate adenylyltransferase [EC:2.7.7.4]	0.000139813	0.000136023	0.000158949	0.000108166	0.000102137	0.00010225	0.000238121	0.000234369	0.000249872	0.000169943	0.000171473	0.000164115	0.000182063	0.000130739	0.000127699	9.61565e-05	8.37789e-05	7.22142e-05	0.000127783	0.000136042	0.000145406	0.000128177	8.47664e-05	0.000105531	0.000331552	0.000347619	0.000291128	0.000148619	0.0001513	0.000173094	0.000201346	0.000217436	0.000203921	0.000162631	0.000239039	0.000159128
K00960	DNA-directed RNA polymerase [EC:2.7.7.6]	2.44796e-06	2.52745e-06	2.16689e-06	1.10279e-05	1.04513e-05	9.01605e-06	3.02173e-06	2.0705e-06	2.75602e-06	3.25952e-06	2.65711e-06	3.0315e-06	6.30362e-06	5.18809e-06	7.82126e-06	5.16975e-06	5.86434e-06	3.88868e-06	5.25273e-07	3.919e-07	8.5393e-07	4.44306e-06	3.90625e-06	3.9293e-06	2.38565e-07	6.04918e-07	4.41866e-07	7.61602e-07	8.0457e-07	3.82678e-07	2.66321e-06	1.47839e-06	2.05495e-06	5.81e-07	2.17756e-06	2.60132e-06
K00962	polyribonucleotide nucleotidyltransferase [EC:2.7.7.8]	0.00102537	0.00101542	0.000978127	0.00113454	0.00114071	0.00112192	0.000895383	0.000905022	0.000902124	0.000816489	0.000826655	0.000804072	0.000852431	0.000939875	0.00104358	0.00101668	0.00104835	0.000971495	0.00104992	0.000950503	0.00105739	0.000986354	0.00106771	0.00102288	0.00083336	0.000833279	0.000845862	0.000768628	0.00068348	0.00065577	0.000931748	0.000736254	0.000810448	0.000619432	0.000924716	0.000984894
K00963	UTP--glucose-1-phosphate uridylyltransferase [EC:2.7.7.9]	0.000600445	0.000603884	0.000601001	0.000531564	0.000541852	0.00055035	0.000487869	0.000503571	0.000488661	0.000503342	0.000491748	0.000501696	0.000503079	0.000603348	0.000497942	0.000588377	0.000601596	0.00059809	0.000595913	0.000571062	0.000586512	0.000526514	0.00058935	0.000563843	0.000402507	0.000387458	0.000427419	0.00045025	0.000426109	0.000436961	0.000523969	0.000527281	0.000491978	0.000553195	0.000484489	0.000529565
K00965	UDPglucose--hexose-1-phosphate uridylyltransferase [EC:2.7.7.12]	0.000317754	0.000320305	0.000320939	0.000301513	0.000303815	0.000294824	0.000219628	0.000219906	0.000214182	0.000214303	0.000207016	0.000209956	0.000259798	0.000304304	0.000279791	0.000319312	0.000373229	0.00025381	0.000240345	0.000214179	0.000233782	0.000274568	0.000283126	0.000278736	0.000137243	0.000134859	0.000150064	0.000183518	0.000165374	0.000156443	0.000213599	0.000217549	0.000202352	0.000190842	0.000207725	0.000246912
K00966	mannose-1-phosphate guanylyltransferase [EC:2.7.7.13]	0.000286153	0.00031428	0.000347774	0.000236116	0.000222312	0.000220014	0.000343882	0.000334488	0.000334768	0.000507511	0.000491893	0.000508881	0.000508142	0.00050489	0.000329375	0.000365551	0.000420795	0.000318608	0.000135372	0.000196118	0.000125203	0.000257518	0.000188548	0.000220873	0.000215496	0.000219006	0.000219417	0.000358441	0.000418622	0.00043867	0.000277064	0.000539966	0.000390594	0.000567846	0.000231262	0.00021881
K00968	choline-phosphate cytidylyltransferase [EC:2.7.7.15]	1.55911e-07	2.10508e-07	1.59377e-07	5.18599e-07	4.02676e-07	3.71973e-07	6.52856e-08	2.08046e-07	1.49881e-07	5.24405e-07	2.66608e-07	5.03865e-07	7.0346e-08	5.67543e-10	1.18583e-06	9.05433e-08	5.17072e-07	1.64305e-08	7.0233e-08	1.20279e-07	1.11714e-07	2.05175e-07	1.71399e-07	2.39469e-07	1.41363e-07	1.85267e-07	4.09566e-08	8.62273e-08	9.26636e-08	5.8736e-08	7.17974e-08	2.43139e-07	1.84701e-07	1.37818e-07	2.42076e-07	2.057e-07
K00969	nicotinate-nucleotide adenylyltransferase [EC:2.7.7.18]	0.000246481	0.000241327	0.000233658	0.000257384	0.000260936	0.000257859	0.000214266	0.000215726	0.00021573	0.0001804	0.0001787	0.000177138	0.000198745	0.000218439	0.000244712	0.000238942	0.000244208	0.000228861	0.000255357	0.000230607	0.000257114	0.000224826	0.000250662	0.000237621	0.000208587	0.000208213	0.000209926	0.000168545	0.000145634	0.000139689	0.000225308	0.000175671	0.000194958	0.000147402	0.000225774	0.000238358
K00970	poly(A) polymerase [EC:2.7.7.19]	0.000363029	0.000357542	0.000366899	0.000327137	0.000324529	0.000323604	0.000232799	0.000260035	0.00024713	0.000261031	0.000266993	0.000257597	0.000165371	0.000208712	0.000264329	0.000286891	0.000324216	0.000233124	0.000308772	0.000289839	0.00031458	0.000353993	0.000314456	0.00033542	0.000214423	0.000215045	0.000221152	0.000350846	0.000342314	0.000344359	0.000215393	0.00015688	0.000178378	0.000166293	0.00027906	0.00028634
K00971	mannose-1-phosphate guanylyltransferase [EC:2.7.7.13]	0.000380762	0.000386042	0.000402484	0.000370517	0.000361335	0.00036162	0.000440319	0.000436124	0.000441683	0.000445656	0.000434168	0.000437467	0.000468328	0.000426247	0.000380825	0.000394256	0.000402142	0.000372354	0.000340154	0.000377645	0.000346158	0.000418736	0.000352016	0.000381957	0.000440156	0.000448557	0.000433121	0.000499107	0.000538864	0.000559594	0.000413556	0.000469467	0.000441499	0.000496656	0.000429235	0.000390539
K00972	UDP-N-acetylglucosamine pyrophosphorylase [EC:2.7.7.23]	8.58183e-06	8.42362e-06	9.44347e-06	8.23711e-06	8.46468e-06	8.44758e-06	5.55757e-05	4.67015e-05	5.17164e-05	2.14944e-05	2.19876e-05	2.05491e-05	4.76512e-05	1.5157e-05	3.73215e-05	8.68524e-06	6.60089e-06	3.20395e-06	1.75864e-05	1.9044e-05	1.85615e-05	2.03407e-05	1.03141e-05	1.38144e-05	0.000104443	0.000109165	9.07799e-05	3.70165e-05	3.72335e-05	3.7354e-05	5.77808e-05	5.64923e-05	6.47025e-05	3.05232e-05	5.55968e-05	3.86637e-05
K00973	glucose-1-phosphate thymidylyltransferase [EC:2.7.7.24]	0.000419733	0.000436772	0.000474013	0.000324033	0.000309393	0.000322452	0.00055553	0.000541954	0.000552142	0.000638726	0.000631651	0.000648351	0.000615641	0.000536181	0.000407571	0.000445659	0.000434364	0.000446559	0.000340113	0.000434817	0.000332521	0.000421477	0.00034091	0.000383369	0.000584104	0.000589254	0.000564294	0.00058816	0.000673821	0.000716478	0.000507744	0.000725001	0.000624988	0.000812618	0.000503472	0.000436189
K00974	tRNA nucleotidyltransferase (CCA-adding enzyme) [EC:2.7.7.72 3.1.3.- 3.1.4.-]	0.000762087	0.000756777	0.00074021	0.000938883	0.000918471	0.000899201	0.000852485	0.000847554	0.000870391	0.000721196	0.000734907	0.000701751	0.000756894	0.00071298	0.000787424	0.000757691	0.000749412	0.000707593	0.000782332	0.000759772	0.000809548	0.00090033	0.000821053	0.000847576	0.000920495	0.000945881	0.00089338	0.000845936	0.000830506	0.000830701	0.000804881	0.000671594	0.000752843	0.000595993	0.000892665	0.0008354
K00975	glucose-1-phosphate adenylyltransferase [EC:2.7.7.27]	0.000459638	0.000457049	0.000441564	0.000460525	0.00047734	0.00047734	0.000429931	0.000436277	0.000417479	0.000421839	0.000425302	0.000428837	0.000450826	0.00051605	0.000477923	0.00048148	0.000499132	0.000494295	0.000481509	0.000424292	0.000469541	0.000427013	0.000497943	0.00046261	0.000361643	0.000351509	0.000375392	0.000325515	0.000269872	0.000248998	0.000445281	0.000435437	0.00042143	0.000358819	0.00037665	0.00043457
K00978	glucose-1-phosphate cytidylyltransferase [EC:2.7.7.33]	6.92301e-05	6.97146e-05	7.57443e-05	6.76204e-05	6.37433e-05	6.57631e-05	7.57081e-05	8.50553e-05	8.04527e-05	0.000131458	0.000140291	0.000141946	5.80275e-05	5.58808e-05	4.03994e-05	6.29103e-05	5.3634e-05	7.03264e-05	4.92379e-05	6.68331e-05	4.82668e-05	8.87947e-05	5.82609e-05	7.39334e-05	7.20785e-05	7.21094e-05	7.28946e-05	0.000139018	0.000154411	0.000162049	5.16167e-05	8.2272e-05	7.24892e-05	0.000116573	7.31776e-05	6.37318e-05
K00979	3-deoxy-manno-octulosonate cytidylyltransferase (CMP-KDO synthetase) [EC:2.7.7.38]	4.78107e-05	5.04763e-05	5.43955e-05	5.18111e-05	4.69995e-05	4.81322e-05	7.82029e-05	8.03134e-05	8.27027e-05	7.13145e-05	7.57084e-05	6.61489e-05	5.03698e-05	2.20636e-05	4.37774e-05	2.26553e-05	1.75436e-05	2.0458e-05	5.40699e-05	5.84226e-05	6.12068e-05	7.90388e-05	4.49887e-05	5.99938e-05	0.000122249	0.000128655	0.000109922	0.000113089	0.000120504	0.000123208	6.77215e-05	6.02927e-05	7.07534e-05	4.00146e-05	8.70637e-05	6.06651e-05
K00980	glycerol-3-phosphate cytidylyltransferase [EC:2.7.7.39]	2.93937e-06	2.83732e-06	3.21651e-06	5.39737e-06	5.10966e-06	4.92394e-06	4.04964e-06	5.28532e-06	4.58668e-06	5.51328e-06	6.23147e-06	5.60064e-06	1.11229e-06	8.24421e-07	3.65142e-06	1.38817e-06	2.10216e-06	1.03365e-06	2.72669e-06	2.7586e-06	3.17032e-06	9.07901e-06	5.21562e-06	6.79794e-06	3.96534e-06	4.23677e-06	3.84918e-06	1.13083e-05	1.22933e-05	1.398e-05	3.71773e-06	1.34727e-06	1.60744e-06	1.79175e-06	4.27117e-06	2.87429e-06
K00981	phosphatidate cytidylyltransferase [EC:2.7.7.41]	0.000205361	0.000201738	0.000200042	0.000220444	0.000219881	0.000215528	0.00019231	0.000194786	0.000196074	0.000186611	0.000191033	0.000184521	0.000175969	0.000167875	0.000222072	0.000188914	0.000192037	0.000178715	0.000205057	0.000192538	0.00021088	0.000195747	0.000196351	0.000195268	0.000201254	0.000204788	0.000196672	0.000182161	0.0001766	0.000171631	0.000192808	0.000154079	0.000173887	0.000122169	0.000201084	0.000197865
K00982	glutamate-ammonia-ligase adenylyltransferase [EC:2.7.7.42]	6.35968e-05	6.72513e-05	7.75805e-05	4.88339e-05	4.67815e-05	4.72899e-05	0.000163852	0.000147501	0.000155962	0.000131201	0.000138804	0.000125394	0.000157803	5.7058e-05	0.000249684	3.43897e-05	5.0605e-05	3.62839e-05	8.51772e-05	9.8443e-05	9.38006e-05	0.000116208	5.92233e-05	8.41988e-05	0.000285645	0.000299103	0.000254115	0.000217557	0.000238633	0.000222687	0.000170304	0.000182586	0.000211036	9.18829e-05	0.000161405	0.000117295
K00983	N-acylneuraminate cytidylyltransferase [EC:2.7.7.43]	5.77097e-05	5.19163e-05	5.75382e-05	5.17209e-05	4.78793e-05	4.83042e-05	5.24154e-05	6.35855e-05	6.41829e-05	7.21427e-05	8.22004e-05	7.87217e-05	1.23368e-05	1.35882e-05	2.05317e-05	3.51656e-05	1.79894e-05	3.87475e-05	4.86824e-05	5.6596e-05	5.4928e-05	4.66097e-05	3.59995e-05	4.28629e-05	5.84097e-05	6.06071e-05	5.39447e-05	5.16076e-05	6.0881e-05	7.08274e-05	3.35771e-05	2.63548e-05	2.93167e-05	4.25668e-05	6.66609e-05	4.6789e-05
K00984	"streptomycin 3""""-adenylyltransferase [EC:2.7.7.47]"	4.87889e-05	4.77478e-05	4.73205e-05	4.00411e-05	4.18637e-05	4.27243e-05	3.41976e-05	3.54063e-05	3.4565e-05	3.09488e-05	2.72751e-05	2.73979e-05	3.17532e-05	4.14248e-05	3.6567e-05	4.3757e-05	4.29238e-05	4.40524e-05	5.70824e-05	5.29047e-05	5.81463e-05	3.6837e-05	4.7285e-05	4.27231e-05	3.0326e-05	2.90401e-05	3.28344e-05	2.93799e-05	2.49421e-05	1.91091e-05	3.65555e-05	2.90042e-05	3.16226e-05	2.68876e-05	3.72347e-05	4.23577e-05
K00986	RNA-directed DNA polymerase [EC:2.7.7.49]	0.00082365	0.000827867	0.000815695	0.00100166	0.000986506	0.000940475	0.000647228	0.000638877	0.000627033	0.000814425	0.000844318	0.000846572	0.000700159	0.000705631	0.000765804	0.000907854	0.001017	0.000722347	0.000583797	0.000612018	0.000563909	0.00100933	0.000851319	0.000910748	0.000538999	0.000544271	0.00057434	0.00107588	0.00115181	0.00123069	0.000807807	0.00061715	0.000696135	0.000725425	0.000719681	0.000780923
K00988	ATP adenylyltransferase [EC:2.7.7.53]	1.98025e-08	9.95319e-09	4.85e-09	0	0	1.10037e-09	1.79337e-08	0	3.02733e-09	0	3.29808e-08	9.04637e-09	4.68782e-07	7.88801e-09	2.15441e-07	0	0	2.15674e-07	3.81435e-10	0	0	0	0	0	0	0	0	0	0	0	0	7.89484e-10	7.73521e-10	0	0	6.796e-09
K00989	ribonuclease PH [EC:2.7.7.56]	0.000227233	0.000227039	0.000215022	0.000259831	0.00026424	0.000259218	0.000167913	0.000174066	0.000165327	0.000194526	0.000198171	0.000195732	0.000177088	0.000217285	0.000241146	0.000236049	0.000254699	0.000229861	0.000228264	0.000201024	0.000224597	0.000236956	0.000254951	0.000243377	0.000122784	0.000118672	0.000137164	0.000199855	0.000180988	0.000170689	0.000190175	0.000146844	0.000161168	0.000125374	0.00016715	0.000204652
K00990	[protein-PII] uridylyltransferase [EC:2.7.7.59]	0.000166931	0.000159755	0.000182625	0.000122678	0.000114695	0.000118496	0.000322218	0.000306477	0.00033074	0.000196115	0.000200966	0.000183038	0.000231508	9.09056e-05	0.000242	8.84544e-05	6.71421e-05	7.23847e-05	0.000197042	0.000218108	0.000222778	0.00019383	0.000115387	0.000152816	0.000536764	0.000562221	0.000475101	0.000293889	0.000317874	0.000323165	0.000298894	0.000272881	0.000318587	0.00017658	0.000358125	0.000246443
K00991	2-C-methyl-D-erythritol 4-phosphate cytidylyltransferase [EC:2.7.7.60]	0.00026955	0.000265734	0.000258342	0.000281283	0.000286109	0.000282104	0.000224159	0.000228198	0.000223127	0.00021136	0.000208073	0.000209439	0.000221123	0.000248739	0.000270848	0.000267916	0.000283291	0.000255466	0.000269358	0.000243967	0.000268382	0.000257013	0.000276972	0.000266823	0.000198121	0.000196263	0.000205215	0.000209637	0.000187945	0.000176418	0.000229505	0.000192308	0.000206806	0.000167904	0.000228682	0.000252675
K00992	[EC:2.7.7.-]	1.73917e-05	2.19644e-05	2.63437e-05	1.42951e-05	1.20285e-05	1.18258e-05	1.81035e-05	1.93269e-05	1.82051e-05	3.99741e-05	3.69215e-05	3.87878e-05	3.73263e-05	3.98167e-05	1.73679e-05	1.89017e-05	2.66314e-05	1.60173e-05	5.1504e-06	7.10052e-06	6.08415e-06	4.14627e-06	3.43431e-06	4.63214e-06	1.65578e-06	2.19202e-06	1.09902e-06	7.65098e-06	9.08701e-06	5.87881e-06	8.47248e-06	3.79024e-05	1.95748e-05	2.90789e-05	2.19413e-06	1.65067e-06
K00995	CDP-diacylglycerol--glycerol-3-phosphate 3-phosphatidyltransferase [EC:2.7.8.5]	0.000320015	0.000316699	0.000318766	0.000295009	0.000293664	0.000297239	0.000393267	0.000373674	0.000388595	0.000321195	0.000321856	0.000320355	0.000374626	0.000313935	0.000379969	0.000316829	0.000307517	0.000310154	0.000331189	0.00034359	0.000331358	0.000307974	0.000304024	0.000306679	0.000491028	0.000497626	0.000466119	0.000324631	0.000333252	0.000338246	0.000402118	0.000401573	0.000418952	0.00038154	0.000406143	0.000373822
K00996	undecaprenyl-phosphate galactose phosphotransferase [EC:2.7.8.6]	0.000138396	0.000136811	0.000135744	0.000167397	0.000163721	0.000160812	0.000147776	0.000159048	0.00015349	0.000181259	0.000198368	0.000188185	0.000106475	9.80285e-05	0.000132182	0.000121526	0.000114786	0.000115995	0.000132296	0.000125581	0.000136896	0.000154178	0.000134653	0.000142716	0.000166135	0.000170417	0.000157744	0.000160944	0.000157545	0.000152116	0.000123478	0.000108273	0.000122749	8.28986e-05	0.000148178	0.000137688
K00997	holo-[acyl-carrier protein] synthase [EC:2.7.8.7]	0.000102911	0.000101408	0.000100967	9.85135e-05	9.93075e-05	0.00010062	9.71189e-05	9.76251e-05	9.69671e-05	7.93601e-05	7.63291e-05	7.85687e-05	8.81327e-05	9.0794e-05	9.33481e-05	9.82008e-05	9.87727e-05	9.793e-05	0.000105259	0.000105253	0.000103998	0.000107686	0.000105617	0.000107413	0.00010119	0.000100324	0.000102853	0.000108371	0.000108864	0.000111622	9.75804e-05	9.14396e-05	9.57298e-05	0.000102711	0.000105051	0.000106129
K00998	phosphatidylserine synthase [EC:2.7.8.8]	0.000115626	0.000114307	0.000116399	0.000128858	0.000126559	0.000125019	0.000161766	0.000156079	0.000162273	0.000115872	0.000113736	0.00010906	0.000141239	0.000101998	0.000146152	9.93447e-05	9.701e-05	9.27803e-05	0.00013051	0.000127588	0.000138455	0.000150953	0.000126007	0.000134836	0.000220895	0.000229165	0.000203862	0.000156075	0.000154442	0.0001521	0.000159127	0.000136408	0.00015678	9.37862e-05	0.000171858	0.000144859
K01000	phospho-N-acetylmuramoyl-pentapeptide-transferase [EC:2.7.8.13]	0.000271956	0.000268938	0.00026674	0.000318596	0.000313267	0.000305238	0.000281204	0.000283522	0.000287039	0.000256795	0.000266195	0.000253142	0.000248114	0.000227332	0.000318321	0.000253395	0.000266417	0.000229368	0.000268826	0.000254019	0.000278586	0.000296929	0.000273094	0.000282301	0.000308984	0.000318071	0.00029662	0.000284528	0.000280114	0.000277606	0.000273007	0.000219389	0.000249443	0.000169924	0.000295423	0.000278611
K01001	UDP-N-acetylglucosamine--dolichyl-phosphate N-acetylglucosaminephosphotransferase [EC:2.7.8.15]	3.57851e-05	4.53347e-05	5.51289e-05	6.2234e-06	4.62139e-06	6.13838e-06	4.85829e-05	5.07901e-05	4.77249e-05	9.55432e-05	9.09098e-05	9.32268e-05	9.7515e-05	0.000111745	3.9873e-05	4.99425e-05	6.75225e-05	4.2026e-05	1.90649e-06	3.82997e-06	1.30762e-06	3.27582e-06	2.07978e-06	2.5172e-06	1.09756e-06	1.59335e-06	4.15657e-07	4.73568e-06	5.08399e-06	2.68428e-06	2.19819e-05	0.000104638	5.07741e-05	7.91452e-05	9.18951e-07	6.14049e-07
K01002	phosphoglycerol transferase [EC:2.7.8.20]	2.41889e-06	2.37546e-06	3.00337e-06	1.08439e-05	1.04555e-05	9.24775e-06	6.82107e-07	1.67663e-07	1.85197e-07	1.36815e-06	5.63698e-07	1.7444e-06	3.40037e-06	5.62867e-08	8.8672e-06	5.97778e-07	2.57229e-07	1.54058e-06	4.24279e-07	1.57988e-07	4.87171e-07	2.5864e-06	2.34768e-06	2.7584e-06	2.18422e-08	1.00227e-08	1.67526e-08	2.09752e-07	1.42876e-07	3.64937e-09	1.69511e-07	1.39585e-07	3.68598e-07	9.18146e-08	1.05065e-07	5.62802e-07
K01003	carboxyvinyl-carboxyphosphonate phosphorylmutase [EC:2.7.8.23]	1.21842e-05	2.02004e-05	1.91327e-05	3.96573e-05	3.26449e-05	3.15245e-05	3.71156e-06	4.05569e-06	5.57607e-06	3.15848e-05	3.64958e-05	2.36382e-05	1.34534e-05	2.79376e-06	1.69455e-05	3.70524e-06	4.21704e-06	5.21342e-06	1.78701e-05	2.13622e-05	2.09507e-05	1.65261e-05	1.30921e-05	1.45549e-05	2.50241e-06	2.88644e-06	3.38687e-06	2.58231e-05	3.01265e-05	2.23846e-05	1.97235e-06	2.91349e-06	4.20934e-06	2.32397e-06	2.48476e-06	2.57451e-06
K01004	phosphatidylcholine synthase [EC:2.7.8.24]	5.46512e-08	2.65144e-08	1.71979e-08	1.55193e-09	7.99494e-08	1.26769e-07	4.77738e-08	5.03442e-10	1.17225e-08	0	3.79863e-07	1.24217e-07	1.24879e-06	2.10129e-08	1.36566e-06	0	6.4488e-08	5.75173e-07	4.67769e-08	9.73639e-08	3.2148e-07	5.04731e-07	1.01383e-06	4.23349e-07	5.34585e-08	0	0	2.43689e-06	3.72894e-06	1.01712e-05	1.15176e-05	1.81656e-06	2.49689e-06	2.55746e-06	1.54312e-06	9.15816e-08
K01005	[EC:2.7.8.-]	3.599e-05	3.78095e-05	3.92018e-05	5.79451e-05	5.36463e-05	5.20782e-05	3.89177e-05	4.82325e-05	4.19709e-05	8.04404e-05	9.07787e-05	8.36173e-05	2.03614e-05	1.46095e-05	3.11988e-05	2.75749e-05	2.99276e-05	2.00752e-05	2.49882e-05	2.68407e-05	2.74039e-05	6.12156e-05	3.55095e-05	4.60826e-05	4.08017e-05	4.3299e-05	3.86394e-05	8.93872e-05	9.44471e-05	9.16231e-05	2.12721e-05	2.1994e-05	2.60275e-05	1.62354e-05	3.58224e-05	3.07012e-05
K01006	pyruvate,orthophosphate dikinase [EC:2.7.9.1]	0.000913685	0.000906999	0.000859031	0.00107428	0.00108146	0.00106124	0.0010595	0.00102154	0.00102895	0.000954957	0.00101395	0.000991183	0.00101671	0.000931028	0.0010466	0.000994322	0.000979135	0.000961638	0.000951736	0.0008942	0.000935382	0.00101499	0.00104205	0.00101303	0.00120252	0.00121442	0.00116279	0.000898834	0.000840354	0.000823358	0.00113926	0.000993738	0.00110097	0.00081691	0.00105021	0.00106529
K01007	pyruvate, water dikinase [EC:2.7.9.2]	0.0017198	0.00170619	0.00180335	0.00141677	0.00137681	0.00142956	0.002123	0.00211914	0.00219433	0.00174455	0.00171445	0.00169061	0.00176696	0.00158247	0.00136293	0.00149446	0.00134973	0.00149061	0.00176035	0.00191523	0.00182067	0.00175737	0.00152028	0.00165302	0.00260179	0.00265112	0.00246262	0.00197063	0.00210106	0.00222267	0.00188542	0.00206739	0.00200835	0.00221103	0.00225543	0.00188436
K01008	selenide, water dikinase [EC:2.7.9.3]	0.000349672	0.000346524	0.000332371	0.000391852	0.000393233	0.000389074	0.000346474	0.000344971	0.000349246	0.000306942	0.000314528	0.000303477	0.000318015	0.00033392	0.000346876	0.000352902	0.00034355	0.000353855	0.000381824	0.000358821	0.000385841	0.000361612	0.000379554	0.000368258	0.000360265	0.000362356	0.000358694	0.00032122	0.0003022	0.000299421	0.000367381	0.000298189	0.000331008	0.000266013	0.000364552	0.00036919
K01011	thiosulfate/3-mercaptopyruvate sulfurtransferase [EC:2.8.1.1 2.8.1.2]	0.000555461	0.000553338	0.000528885	0.000529785	0.000549968	0.000557773	0.000445558	0.000453855	0.000439985	0.000356773	0.000348979	0.000343457	0.000418545	0.000524498	0.000529438	0.000534985	0.000551909	0.000563381	0.000644353	0.000582206	0.000636604	0.000563106	0.000643919	0.000603866	0.000416014	0.000400269	0.000442714	0.000439183	0.000375219	0.000355129	0.000511454	0.00041227	0.000445402	0.00039133	0.000475792	0.000541276
K01012	biotin synthetase [EC:2.8.1.6]	0.000859472	0.00084776	0.000826877	0.000861217	0.000877351	0.000869745	0.000818723	0.000809853	0.00081086	0.000700641	0.000686172	0.0006933	0.000819166	0.000870284	0.000875165	0.00088074	0.000905325	0.000841516	0.000875717	0.000804475	0.000874176	0.000776607	0.000862308	0.000818369	0.000795752	0.000795824	0.000794885	0.000619035	0.000549772	0.000524461	0.000842144	0.000754884	0.000783846	0.000644129	0.000813929	0.000854846
K01014	aryl sulfotransferase [EC:2.8.2.1]	3.63535e-08	1.79538e-08	1.01571e-08	6.85545e-10	0	1.98487e-09	3.23493e-08	1.67861e-10	6.68045e-09	0	6.32155e-08	1.75948e-08	8.45602e-07	1.42286e-08	5.82889e-07	0	2.1502e-08	3.89251e-07	1.37379e-09	4.81843e-10	0	0	0	0	0	0	0	6.41346e-10	0	1.21243e-09	4.36068e-10	2.84344e-09	5.06592e-09	5.42404e-10	1.66108e-09	1.46734e-08
K01023	arylsulfate sulfotransferase [EC:2.8.2.22]	6.60734e-06	8.06425e-06	8.56289e-06	1.87051e-05	1.65806e-05	1.64994e-05	7.26728e-06	1.08456e-05	7.39424e-06	1.97339e-05	2.24982e-05	2.12595e-05	4.9599e-07	3.47633e-06	5.6647e-06	1.92555e-06	4.5319e-06	2.98925e-06	3.72751e-06	3.35798e-06	3.47902e-06	3.57537e-05	1.77766e-05	2.59232e-05	6.07374e-06	6.72872e-06	6.90764e-06	4.74321e-05	5.0818e-05	5.15616e-05	4.54784e-06	6.97808e-06	8.30703e-06	2.9868e-06	5.23969e-06	5.30184e-06
K01025	[EC:2.8.2.-]	1.43175e-08	0	1.57798e-08	5.52526e-09	0	0	0	3.79562e-09	2.75789e-08	0	0	0	0	0	1.74904e-06	0	4.86197e-07	4.79802e-09	0	0	0	0	0	0	0	0	0	0	0	0	0	0	0	0	0	0
K01026	propionate CoA-transferase [EC:2.8.3.1]	0.000242084	0.0002389	0.000230373	0.000233004	0.000241292	0.000242727	0.000346369	0.000326932	0.000332793	0.000260282	0.000267994	0.000264532	0.000334022	0.000282129	0.000302145	0.000256643	0.000242561	0.000253894	0.000279721	0.000254425	0.000276632	0.000215963	0.000249849	0.000229876	0.000449013	0.000456303	0.000416298	0.000196915	0.000177874	0.000177895	0.000380268	0.000359589	0.000375078	0.000245535	0.000327498	0.000308165
K01027	3-oxoacid CoA-transferase [EC:2.8.3.5]	1.49597e-05	1.50124e-05	1.53759e-05	1.52894e-05	1.5131e-05	1.50328e-05	4.86916e-05	4.10314e-05	4.54674e-05	1.85965e-05	1.778e-05	1.6456e-05	4.451e-05	1.90606e-05	3.81836e-05	1.42302e-05	1.21612e-05	9.9845e-06	2.30924e-05	2.37273e-05	2.40635e-05	1.71554e-05	1.40443e-05	1.49177e-05	8.67877e-05	9.02182e-05	7.62791e-05	2.40739e-05	2.50472e-05	2.40045e-05	5.26877e-05	5.16361e-05	5.77418e-05	2.8306e-05	4.9125e-05	3.68691e-05
K01028	3-oxoacid CoA-transferase subunit A [EC:2.8.3.5]	9.03291e-05	8.90251e-05	8.64254e-05	8.03007e-05	8.38104e-05	8.51498e-05	9.35608e-05	8.96421e-05	8.98643e-05	7.31374e-05	7.10048e-05	7.00844e-05	9.78064e-05	8.88715e-05	0.000109684	8.73349e-05	8.78028e-05	9.15861e-05	0.00010908	0.000100242	0.000109141	8.17944e-05	9.60904e-05	8.89201e-05	0.000110964	0.00011064	0.000108581	7.44571e-05	6.60854e-05	5.69261e-05	0.00010545	9.07442e-05	0.000100066	6.74758e-05	9.37024e-05	9.82766e-05
K01029	3-oxoacid CoA-transferase subunit B [EC:2.8.3.5]	0.00013424	0.000133008	0.000126844	0.000132522	0.000136578	0.000137691	0.000126759	0.000125982	0.000122875	0.000113456	0.000115757	0.000113098	0.000128362	0.000128152	0.000145276	0.00013277	0.00013165	0.000139406	0.000155194	0.00013969	0.000153776	0.000119419	0.000144634	0.000132167	0.000135104	0.000133028	0.000135154	9.61488e-05	8.00677e-05	6.87815e-05	0.000140498	0.000118115	0.000129317	9.22753e-05	0.000124884	0.000137574
K01031	3-oxoadipate CoA-transferase, alpha subunit [EC:2.8.3.6]	2.59887e-05	2.57053e-05	2.4434e-05	3.25158e-05	3.18041e-05	3.1655e-05	4.94362e-05	4.61393e-05	4.77062e-05	4.10198e-05	4.61419e-05	4.2888e-05	4.71633e-05	2.65994e-05	4.76125e-05	2.63597e-05	2.23944e-05	2.85446e-05	3.11886e-05	2.95858e-05	3.1401e-05	2.80064e-05	2.76392e-05	2.72682e-05	7.28304e-05	7.4842e-05	6.56435e-05	2.90179e-05	2.72237e-05	2.56125e-05	5.02142e-05	4.68329e-05	5.26867e-05	2.87034e-05	4.63009e-05	3.99569e-05
K01032	3-oxoadipate CoA-transferase, beta subunit [EC:2.8.3.6]	6.57075e-05	6.53043e-05	6.10998e-05	5.95241e-05	6.22507e-05	6.33652e-05	6.56524e-05	6.08338e-05	6.2608e-05	3.47492e-05	3.29092e-05	3.21448e-05	7.03492e-05	6.74897e-05	7.5532e-05	6.60583e-05	6.70417e-05	6.85395e-05	7.8459e-05	6.91282e-05	7.68144e-05	5.5252e-05	7.17568e-05	6.37492e-05	7.78248e-05	7.70575e-05	7.6158e-05	3.40504e-05	2.37575e-05	2.06928e-05	7.76773e-05	6.52723e-05	7.13519e-05	5.00193e-05	6.83276e-05	7.35283e-05
K01034	acetate CoA-transferase alpha subunit [EC:2.8.3.8]	0.000192765	0.000189728	0.000177221	0.000189367	0.000197738	0.000199575	0.000172369	0.000171736	0.000167153	0.00013908	0.000141091	0.00014129	0.000164771	0.000191009	0.000180195	0.000197491	0.000193439	0.000205741	0.000221327	0.000192684	0.000216074	0.000167514	0.000214545	0.000191506	0.000172369	0.000167396	0.000175752	0.000109356	7.80831e-05	6.81126e-05	0.000196413	0.000159901	0.000173819	0.000130521	0.000171797	0.00019716
K01035	acetate CoA-transferase beta subunit [EC:2.8.3.8]	0.000149051	0.000146233	0.000138154	0.000144816	0.000150777	0.000151925	0.000148223	0.000145452	0.000143523	0.000121982	0.000124639	0.000123865	0.000140322	0.000146426	0.000149834	0.000151492	0.000145739	0.000156224	0.000172283	0.000153046	0.000169594	0.000126319	0.000160103	0.000143479	0.000163769	0.000161645	0.000161493	9.10107e-05	6.96788e-05	5.98127e-05	0.000165412	0.0001385	0.000151972	0.000107192	0.000146313	0.000159212
K01036	butyrate-acetoacetate CoA-transferase [EC:2.8.3.9]	1.75619e-08	0	0	2.30084e-07	2.19824e-07	2.09992e-07	1.5847e-07	2.97204e-07	1.14985e-07	1.25655e-08	4.07378e-09	5.86638e-08	9.86997e-08	0	3.94353e-08	1.1478e-07	1.73046e-07	0	3.18048e-09	6.94998e-09	5.48388e-09	5.26266e-08	5.27078e-08	4.70451e-08	1.86108e-08	1.79002e-08	2.99195e-08	4.20974e-09	4.28302e-09	4.58347e-09	2.34365e-08	7.47694e-08	3.22488e-08	2.5575e-08	1.00309e-07	7.37964e-08
K01039	glutaconate CoA-transferase, subunit A [EC:2.8.3.12]	8.17189e-05	8.37941e-05	6.93959e-05	0.000260048	0.000246035	0.000215012	0.000240649	0.000192973	0.000227317	0.000159442	0.000153914	0.000146085	0.00031958	0.000213042	0.000337844	0.000191054	0.000213811	0.000131872	6.76538e-05	7.37545e-05	8.1716e-05	0.000158983	0.000119006	0.000125784	0.000280963	0.000305673	0.000253085	0.000131167	0.000141717	0.000123893	0.000239184	0.000199184	0.000240111	9.8728e-05	0.000218078	0.00018492
K01040	glutaconate CoA-transferase, subunit B [EC:2.8.3.12]	7.17401e-05	7.33867e-05	6.07007e-05	0.000225468	0.000213576	0.000186669	0.000216843	0.000173776	0.000204739	0.000140014	0.000134307	0.000127644	0.000286146	0.000188129	0.000300147	0.000168134	0.000187666	0.000115575	6.09368e-05	6.65194e-05	7.34175e-05	0.000136844	0.000102732	0.000107954	0.000258384	0.000280569	0.000232221	0.000114289	0.000124	0.00010857	0.000216156	0.000180789	0.000217535	8.98615e-05	0.000197218	0.000166118
K01041	[EC:2.8.3.-]	9.13475e-05	9.22452e-05	9.12579e-05	8.77503e-05	9.07363e-05	9.03379e-05	6.2222e-05	6.1815e-05	6.08165e-05	6.88294e-05	6.24822e-05	6.2427e-05	6.98044e-05	8.34357e-05	0.000121603	8.43076e-05	9.29411e-05	8.82314e-05	0.000106291	9.99311e-05	0.000106965	7.47512e-05	9.38629e-05	8.53387e-05	5.20848e-05	4.88846e-05	5.84587e-05	6.7276e-05	6.06603e-05	4.86951e-05	7.4005e-05	6.23949e-05	6.6786e-05	5.96912e-05	6.41775e-05	7.81585e-05
K01042	L-seryl-tRNA(Ser) seleniumtransferase [EC:2.9.1.1]	0.000618696	0.000616859	0.000583645	0.000678254	0.000684978	0.000680361	0.000539524	0.000543	0.000543438	0.000462808	0.00046524	0.000450349	0.000506668	0.000597228	0.00058342	0.000622503	0.000622478	0.000621576	0.000684644	0.000613671	0.00068847	0.000590955	0.000677216	0.000632335	0.000508154	0.000503975	0.000520075	0.000431748	0.00036202	0.000339029	0.000587617	0.000454124	0.000503729	0.000380738	0.000563046	0.000610647
K01043	[EC:2.-.-.-]	5.62157e-05	5.60849e-05	6.46045e-05	3.60201e-05	3.29397e-05	3.42548e-05	7.97042e-05	7.7881e-05	8.30696e-05	7.40568e-05	7.37114e-05	7.37525e-05	7.28475e-05	5.57915e-05	7.78459e-05	4.49372e-05	4.6728e-05	3.93097e-05	4.25481e-05	5.16123e-05	4.61116e-05	3.66232e-05	2.62856e-05	3.27621e-05	0.0001011	0.000104819	9.05012e-05	4.69816e-05	5.32622e-05	5.68336e-05	6.24841e-05	8.7891e-05	7.78786e-05	8.08819e-05	7.63703e-05	5.52596e-05
K01046	triacylglycerol lipase [EC:3.1.1.3]	1.95248e-05	1.87106e-05	2.48018e-05	4.24311e-05	4.10023e-05	3.68492e-05	1.40512e-05	1.8879e-05	1.28597e-05	2.61436e-05	2.09494e-05	2.90947e-05	1.96471e-05	3.68451e-06	0.000101888	1.29122e-05	2.95783e-05	9.43762e-06	1.58101e-05	2.0205e-05	1.81279e-05	1.43626e-05	1.19984e-05	1.4054e-05	8.85002e-06	8.79954e-06	9.92715e-06	3.2641e-05	3.0623e-05	2.41118e-05	5.81931e-06	8.83396e-06	8.93433e-06	1.26747e-05	1.3061e-05	1.1258e-05
K01048	lysophospholipase [EC:3.1.1.5]	0.000154015	0.000152235	0.000144778	0.000153515	0.000161528	0.000161404	0.000114196	0.000115918	0.000109112	8.56215e-05	7.91848e-05	8.40708e-05	0.000118131	0.000154265	0.000137786	0.000154651	0.000159544	0.000159821	0.000175446	0.000151774	0.000171412	0.000136966	0.000174742	0.000157106	9.13243e-05	8.52766e-05	0.000101503	8.79506e-05	6.20693e-05	5.25579e-05	0.000134081	0.00010899	0.000113734	9.62899e-05	0.000115289	0.000143033
K01051	pectinesterase [EC:3.1.1.11]	3.9118e-06	1.99335e-06	2.39938e-06	5.22498e-06	4.90022e-06	4.85985e-06	3.27932e-06	3.86497e-06	3.5027e-06	9.2539e-07	9.60447e-07	8.8057e-07	3.92021e-06	5.83823e-07	9.09479e-06	1.26095e-06	1.59444e-06	1.61312e-06	2.09002e-06	2.34533e-06	2.66243e-06	2.6934e-06	2.15287e-06	2.58473e-06	2.28745e-06	2.41131e-06	2.17078e-06	1.67313e-07	2.8335e-07	1.37157e-07	9.9602e-07	2.9619e-06	1.89847e-06	8.30469e-07	2.71272e-06	1.95107e-06
K01053	gluconolactonase [EC:3.1.1.17]	7.12476e-06	7.64208e-06	9.36885e-06	3.46324e-06	3.22944e-06	3.471e-06	3.59105e-06	4.42704e-06	3.8276e-06	1.54736e-05	1.51233e-05	1.34227e-05	1.31337e-05	2.13717e-06	1.03853e-05	2.4027e-06	2.68749e-06	6.00735e-06	9.56733e-06	1.19204e-05	1.14598e-05	7.22365e-06	3.84882e-06	5.29441e-06	3.07646e-06	3.30585e-06	3.76534e-06	2.00687e-05	2.35321e-05	1.91125e-05	1.59272e-06	2.12842e-06	2.95451e-06	2.11973e-06	3.15732e-06	2.63437e-06
K01054	acylglycerol lipase [EC:3.1.1.23]	1.64197e-06	1.92017e-06	2.38939e-06	5.69961e-07	5.03515e-07	5.20291e-07	2.13454e-06	2.19454e-06	2.0904e-06	4.05051e-06	3.8614e-06	3.90492e-06	5.80294e-06	4.60954e-06	8.95182e-06	2.10526e-06	4.37553e-06	2.55169e-06	7.95863e-08	1.46446e-07	5.03043e-08	1.21289e-07	8.55645e-08	9.75067e-08	2.92598e-08	3.99829e-08	2.2552e-08	1.95208e-07	2.02997e-07	1.07966e-07	8.97024e-07	4.30008e-06	2.08935e-06	3.24412e-06	4.27262e-08	6.55033e-08
K01055	3-oxoadipate enol-lactonase [EC:3.1.1.24]	5.85752e-05	5.64155e-05	5.86297e-05	3.94964e-05	4.09782e-05	4.2233e-05	0.000125343	0.00010699	0.000118805	5.18966e-05	4.68474e-05	4.57343e-05	0.000126786	6.35943e-05	0.000115314	5.28389e-05	4.69535e-05	4.86239e-05	8.02583e-05	8.10186e-05	8.4067e-05	4.32776e-05	4.77518e-05	4.47372e-05	0.000209523	0.000216526	0.000186321	5.35333e-05	5.24547e-05	5.19233e-05	0.00014529	0.000129271	0.000146501	7.99375e-05	0.000130306	0.000102547
K01056	peptidyl-tRNA hydrolase, PTH1 family [EC:3.1.1.29]	0.00015401	0.000150315	0.000147116	0.000178898	0.000177986	0.000173444	0.000150539	0.000152622	0.000153321	0.000146289	0.000150412	0.000147164	0.000137321	0.000134115	0.000182592	0.000150858	0.000153486	0.000141823	0.000152374	0.000141257	0.000156342	0.000146536	0.00015084	0.000147772	0.000151312	0.000154025	0.000148022	0.000123606	0.000113714	0.000106797	0.000142586	0.0001157	0.000130445	9.12267e-05	0.00015264	0.000152327
K01057	6-phosphogluconolactonase [EC:3.1.1.31]	5.36759e-05	5.21535e-05	5.70989e-05	3.74845e-05	3.65016e-05	3.81117e-05	4.17469e-05	4.61764e-05	4.66867e-05	4.86353e-05	4.54775e-05	4.29023e-05	3.15986e-05	2.83246e-05	4.97323e-05	3.51898e-05	3.37918e-05	3.55412e-05	6.04339e-05	6.45307e-05	6.62768e-05	4.12111e-05	3.87978e-05	4.11282e-05	4.25469e-05	4.3121e-05	4.32514e-05	5.61823e-05	6.08107e-05	5.50204e-05	3.19622e-05	2.46351e-05	2.86147e-05	3.13475e-05	4.8419e-05	4.18458e-05
K01058	phospholipase A1 [EC:3.1.1.32]	1.47319e-06	1.97658e-06	2.07179e-06	7.18394e-06	7.40143e-06	6.83249e-06	4.09874e-06	5.76916e-06	3.87896e-06	1.13238e-05	1.52307e-05	1.27874e-05	6.16532e-06	1.27645e-06	7.23098e-06	5.73849e-07	2.51772e-06	4.08242e-06	1.43783e-06	1.08908e-06	1.25393e-06	1.81755e-05	8.74508e-06	1.26829e-05	3.41055e-06	3.71406e-06	3.87486e-06	2.75768e-05	2.84046e-05	2.87151e-05	1.62435e-06	1.97761e-06	2.3411e-06	1.1715e-06	2.74429e-06	2.75566e-06
K01060	cephalosporin-C deacetylase [EC:3.1.1.41]	8.85575e-06	8.12936e-06	9.50195e-06	8.78468e-06	8.38883e-06	7.83553e-06	6.44464e-06	6.46816e-06	5.64747e-06	7.91197e-07	8.64059e-07	9.99333e-07	8.89751e-06	8.07447e-07	9.18483e-06	5.32539e-06	8.53229e-06	1.23872e-07	1.61412e-06	1.74633e-06	1.17819e-06	2.69085e-06	2.4217e-06	3.25722e-06	9.38506e-07	8.40752e-07	1.35134e-06	2.00729e-07	8.31556e-07	1.83021e-07	6.11315e-07	1.2789e-06	9.89354e-07	2.12127e-06	2.70828e-06	3.69916e-06
K01061	carboxymethylenebutenolidase [EC:3.1.1.45]	1.85465e-05	1.91575e-05	2.29067e-05	1.06887e-05	9.77491e-06	1.08065e-05	1.7763e-05	1.75713e-05	1.79704e-05	3.8793e-05	3.8826e-05	3.6307e-05	2.94825e-05	1.01372e-05	3.8303e-05	1.3027e-05	1.25217e-05	2.19207e-05	2.31677e-05	3.50189e-05	2.51168e-05	2.75077e-05	1.73297e-05	2.24338e-05	2.21284e-05	2.18889e-05	2.39914e-05	5.89819e-05	7.1406e-05	6.74876e-05	1.69961e-05	2.20684e-05	2.40056e-05	3.81988e-05	2.12837e-05	1.80556e-05
K01062	1-alkyl-2-acetylglycerophosphocholine esterase [EC:3.1.1.47]	8.04231e-08	4.04224e-08	1.96971e-08	0	0	4.46887e-09	7.28334e-08	0	1.22948e-08	0	1.3718e-07	3.78492e-08	1.90384e-06	3.20352e-08	1.00926e-06	0	0	8.75909e-07	3.26578e-09	0	0	0	0	0	0	0	0	5.57388e-10	0	6.06871e-10	0	6.75942e-09	6.62275e-09	2.71495e-10	1.44363e-09	3.13598e-08
K01066	esterase / lipase [EC:3.1.1.-]	2.5092e-05	2.20941e-05	2.43037e-05	5.02626e-05	4.75357e-05	4.51417e-05	2.87846e-05	3.61883e-05	3.21111e-05	7.44385e-05	8.56919e-05	8.70293e-05	3.01485e-05	8.03751e-06	9.63081e-05	2.18289e-05	2.52899e-05	3.82872e-05	1.4778e-05	2.01702e-05	1.5044e-05	3.37318e-05	2.37318e-05	2.87728e-05	2.38548e-05	2.38041e-05	2.36047e-05	5.18433e-05	5.29663e-05	5.4277e-05	1.35788e-05	1.71937e-05	1.84662e-05	3.03306e-05	2.40087e-05	2.11478e-05
K01067	acetyl-CoA hydrolase [EC:3.1.2.1]	0.000407257	0.000409359	0.000391817	0.000433769	0.000442667	0.000439108	0.000510861	0.000472932	0.00048769	0.000343741	0.000335942	0.000324633	0.000504387	0.000447697	0.000536155	0.000413919	0.0004246	0.000406644	0.000479408	0.000440134	0.000480622	0.00046936	0.000473679	0.000465341	0.0006499	0.000661568	0.000618042	0.000435398	0.000402228	0.000372479	0.000571243	0.000508344	0.000573026	0.000342161	0.000514141	0.00050566
K01068	palmitoyl-CoA hydrolase [EC:3.1.2.2]	8.3385e-08	7.79337e-08	9.33672e-08	3.29416e-07	3.14515e-07	2.73261e-07	2.62478e-08	0	4.78859e-09	2.22296e-08	2.17645e-08	4.07181e-08	3.09357e-07	5.20542e-09	1.85644e-07	1.57058e-08	0	1.42327e-07	1.19654e-08	3.13107e-09	1.50477e-08	7.62572e-08	6.99336e-08	8.32271e-08	1.56981e-10	0	0	4.18917e-09	2.8414e-09	0	1.57205e-09	1.04025e-09	2.47207e-09	2.04048e-09	7.23327e-10	1.18286e-08
K01069	hydroxyacylglutathione hydrolase [EC:3.1.2.6]	0.000547542	0.000548296	0.000551158	0.000575504	0.000569055	0.000567768	0.000683295	0.000648757	0.000674413	0.000595684	0.000582935	0.000589942	0.000695947	0.000603514	0.000648869	0.000586631	0.000572803	0.00058626	0.000572578	0.00061547	0.000573593	0.000614311	0.000573366	0.000590571	0.000789428	0.000799949	0.000766451	0.000688057	0.000717638	0.000723519	0.000680658	0.000705237	0.000722207	0.000732773	0.000699925	0.000653017
K01070	S-formylglutathione hydrolase [EC:3.1.2.12]	5.98864e-06	6.53165e-06	8.33482e-06	1.78657e-06	1.71459e-06	1.6671e-06	1.49842e-06	1.60079e-06	1.5032e-06	1.22509e-05	1.11695e-05	9.94824e-06	9.30513e-06	1.46933e-06	7.90855e-06	1.89661e-06	1.18598e-06	3.65862e-06	8.37667e-06	1.09786e-05	1.02665e-05	6.09517e-07	4.84861e-07	7.55752e-07	9.39199e-07	9.96639e-07	1.6663e-06	1.17548e-05	1.48484e-05	9.87454e-06	9.28734e-07	1.3653e-06	2.0986e-06	1.16366e-06	1.26642e-06	1.144e-06
K01071	oleoyl-[acyl-carrier-protein] hydrolase [EC:3.1.2.14]	8.94726e-07	8.95511e-07	9.75307e-07	3.97489e-06	4.12246e-06	3.40803e-06	1.57611e-06	2.43639e-06	1.09438e-06	7.7471e-07	1.2326e-06	1.0771e-06	2.42643e-06	1.36578e-07	5.86042e-06	1.14667e-06	2.05012e-06	1.21572e-06	2.7467e-07	2.54417e-07	3.07678e-07	1.69864e-06	1.38514e-06	1.64341e-06	2.32208e-07	1.78196e-07	3.11553e-07	3.23363e-07	2.75566e-07	1.91302e-07	3.49724e-07	7.99786e-07	6.21954e-07	3.32321e-07	1.00274e-06	8.37695e-07
K01073	acyl-CoA hydrolase [EC:3.1.2.20]	1.2998e-05	1.29837e-05	1.28339e-05	1.66653e-05	1.68908e-05	1.6337e-05	8.49849e-06	8.73732e-06	7.99041e-06	8.23242e-06	7.77076e-06	8.32095e-06	8.5411e-06	1.01534e-05	9.60509e-06	1.14036e-05	1.22719e-05	1.10009e-05	1.23022e-05	1.05101e-05	1.19322e-05	1.44142e-05	1.46502e-05	1.45703e-05	6.96193e-06	6.6161e-06	7.71608e-06	1.20952e-05	1.07521e-05	1.03785e-05	9.16473e-06	7.13385e-06	7.70511e-06	6.79155e-06	8.64259e-06	1.07786e-05
K01075	4-hydroxybenzoyl-CoA thioesterase [EC:3.1.2.23]	3.24795e-06	3.50115e-06	4.59665e-06	7.55712e-08	7.42765e-08	1.37177e-07	7.55726e-07	9.30954e-07	8.71708e-07	7.32685e-06	6.43013e-06	5.79875e-06	3.54535e-06	8.51141e-07	2.17031e-06	1.09936e-06	7.89919e-07	1.25659e-06	4.94413e-06	6.53481e-06	6.07664e-06	3.8151e-08	3.62994e-08	1.07998e-07	5.45502e-07	5.75292e-07	9.61578e-07	7.01775e-06	8.90803e-06	5.9055e-06	5.24417e-07	7.81624e-07	1.16446e-06	6.79036e-07	6.50097e-07	5.31965e-07
K01076	[EC:3.1.2.-]	3.63637e-05	3.43825e-05	3.99563e-05	2.81556e-05	2.59064e-05	2.61356e-05	2.64173e-05	3.15453e-05	3.29141e-05	3.00556e-05	2.9492e-05	2.64757e-05	9.50593e-06	7.20431e-06	1.5355e-05	1.45165e-05	8.75561e-06	1.49496e-05	3.58217e-05	3.96374e-05	4.24759e-05	2.69322e-05	1.90664e-05	2.43434e-05	3.17767e-05	3.35751e-05	2.95944e-05	3.36859e-05	3.76428e-05	3.69944e-05	1.49368e-05	9.10068e-06	1.25354e-05	1.23301e-05	3.65456e-05	2.42609e-05
K01077	alkaline phosphatase [EC:3.1.3.1]	0.000170417	0.000174396	0.00018057	0.000195921	0.000191038	0.000189492	0.000161453	0.000182138	0.000171257	0.000234142	0.000250004	0.000239373	0.000150626	0.000171837	0.000141272	0.000149098	0.000149121	0.000155849	0.000144734	0.000133304	0.000149417	0.000190313	0.000169296	0.00017687	0.000109547	0.000109928	0.000111587	0.000167542	0.000161069	0.000166658	0.000122944	0.000145135	0.000118036	0.000127163	0.000126552	0.000123239
K01078	acid phosphatase [EC:3.1.3.2]	2.91041e-06	2.78154e-06	2.42389e-06	1.1852e-05	1.13044e-05	9.73456e-06	3.54172e-06	2.48354e-06	3.02848e-06	3.01154e-06	3.11352e-06	3.17288e-06	1.3836e-05	5.25064e-06	1.72423e-05	5.41782e-06	7.22483e-06	7.30345e-06	5.6105e-07	4.05188e-07	8.75233e-07	4.13043e-06	3.70061e-06	3.73899e-06	2.8023e-07	6.29265e-07	4.79334e-07	7.5768e-07	7.98852e-07	3.96933e-07	2.63597e-06	1.53792e-06	2.07679e-06	6.15722e-07	2.30725e-06	2.81675e-06
K01079	phosphoserine phosphatase [EC:3.1.3.3]	0.000170435	0.000178448	0.000194037	0.000122015	0.00011655	0.00011991	0.000160502	0.000166888	0.000169703	0.000202959	0.000191865	0.000191788	0.000199652	0.000225396	0.000184015	0.000165183	0.000186348	0.000157946	0.000139954	0.000146982	0.000147931	0.000117825	0.000122103	0.000121774	0.000107232	0.000108558	0.000106336	9.27223e-05	9.66597e-05	9.41073e-05	0.000127606	0.000201561	0.000147007	0.000191156	0.000128201	0.000116641
K01081	5'-nucleotidase [EC:3.1.3.5]	0.000360577	0.00035468	0.00035523	0.000383023	0.000383132	0.000388526	0.000425362	0.00041627	0.000419722	0.000413275	0.000417405	0.000428154	0.000379667	0.000325204	0.000369718	0.000370377	0.000331476	0.000410934	0.000400754	0.000453311	0.000390408	0.000450668	0.000402704	0.000429639	0.000512179	0.00050873	0.000514191	0.000607536	0.000655423	0.000678661	0.000434564	0.000431361	0.00046157	0.000565479	0.000468513	0.000448871
K01082	3'(2'), 5'-bisphosphate nucleotidase [EC:3.1.3.7]	3.29414e-05	3.06195e-05	3.64995e-05	1.48752e-05	1.36853e-05	1.48116e-05	6.09468e-05	5.46163e-05	6.25693e-05	3.35395e-05	3.00325e-05	2.80044e-05	5.0439e-05	1.74609e-05	6.64252e-05	1.88895e-05	1.44261e-05	1.46825e-05	4.31065e-05	5.09853e-05	4.95317e-05	1.40358e-05	1.20933e-05	1.36843e-05	0.000105431	0.000109847	9.30736e-05	3.35956e-05	4.03083e-05	4.19195e-05	6.62255e-05	5.41229e-05	6.36251e-05	4.22096e-05	7.08879e-05	4.75275e-05
K01083	3-phytase [EC:3.1.3.8]	1.34377e-05	1.46694e-05	1.92812e-05	1.23555e-06	1.19041e-06	1.2644e-06	2.9814e-06	3.85533e-06	3.59252e-06	3.03955e-05	2.62524e-05	2.40003e-05	9.78848e-06	3.44159e-06	7.87342e-06	4.60658e-06	3.40089e-06	2.95407e-06	2.07101e-05	2.72527e-05	2.54256e-05	3.77343e-07	3.61015e-07	7.03392e-07	2.26175e-06	2.38181e-06	3.98545e-06	2.90618e-05	3.68885e-05	2.44513e-05	2.17076e-06	3.22354e-06	4.82211e-06	2.981e-06	2.68981e-06	2.13723e-06
K01085	glucose-1-phosphatase [EC:3.1.3.10]	1.0658e-06	1.23351e-06	1.44346e-06	1.65023e-06	1.69051e-06	1.63742e-06	8.16899e-07	1.18641e-06	8.57894e-07	4.484e-06	3.62023e-06	3.69404e-06	1.11761e-06	7.65432e-07	6.04699e-06	3.41956e-07	9.57219e-07	1.11094e-06	1.22541e-06	1.43458e-06	1.39456e-06	3.2581e-06	1.6468e-06	2.33299e-06	6.83381e-07	7.57154e-07	8.32517e-07	5.89397e-06	6.51464e-06	6.0759e-06	9.56962e-07	1.61995e-06	2.06786e-06	4.80215e-07	6.97757e-07	8.74742e-07
K01087	trehalose 6-phosphate phosphatase [EC:3.1.3.12]	2.25849e-05	3.08704e-05	3.01324e-05	5.15774e-05	4.37718e-05	4.46487e-05	2.04075e-05	2.9376e-05	2.57829e-05	6.00522e-05	6.92589e-05	5.5719e-05	1.11195e-05	8.36762e-06	6.05093e-05	8.01126e-06	2.2551e-05	1.06586e-05	2.48516e-05	2.72331e-05	2.80421e-05	7.2256e-05	3.97037e-05	5.25546e-05	2.13886e-05	2.39933e-05	2.16826e-05	0.000116108	0.000131485	0.000143439	3.22021e-05	1.89715e-05	2.26057e-05	1.35071e-05	2.41945e-05	1.67337e-05
K01089	imidazoleglycerol-phosphate dehydratase / histidinol-phosphatase [EC:4.2.1.19 3.1.3.15]	7.42601e-05	7.4066e-05	7.06803e-05	6.94112e-05	7.20133e-05	7.2311e-05	5.36403e-05	5.29854e-05	5.1863e-05	4.57707e-05	4.11447e-05	4.32213e-05	6.21034e-05	7.21037e-05	7.13978e-05	7.56999e-05	7.91684e-05	7.68683e-05	8.23189e-05	7.55016e-05	8.10647e-05	6.52359e-05	8.04574e-05	7.32824e-05	4.45045e-05	4.22809e-05	4.92406e-05	4.90258e-05	4.26268e-05	3.83633e-05	6.6269e-05	5.32375e-05	5.72742e-05	5.15838e-05	5.79255e-05	6.97226e-05
K01090	protein phosphatase [EC:3.1.3.16]	0.000351944	0.000354065	0.000353674	0.000363759	0.000367244	0.000361404	0.000386326	0.00036353	0.000371246	0.000365099	0.00034697	0.00036229	0.000449603	0.000424878	0.000458054	0.000395662	0.000409789	0.000385199	0.000347595	0.000355496	0.000342117	0.000334691	0.000354582	0.000343473	0.000386921	0.000386886	0.00038556	0.000332062	0.000335749	0.000329386	0.000410269	0.000438179	0.000426414	0.00042497	0.000364935	0.000373497
K01091	phosphoglycolate phosphatase [EC:3.1.3.18]	0.000477688	0.000472201	0.000474918	0.000457061	0.000461316	0.000462658	0.00047473	0.000487925	0.000476014	0.000551582	0.000574412	0.000566572	0.000443732	0.000432029	0.000451341	0.000451527	0.000438938	0.000458209	0.000470075	0.000456731	0.000471248	0.000458007	0.000456924	0.000456676	0.00049746	0.000497755	0.000488385	0.000481417	0.000469955	0.000461742	0.000470309	0.000455475	0.000462962	0.000414626	0.000460367	0.00046056
K01092	myo-inositol-1(or 4)-monophosphatase [EC:3.1.3.25]	0.000144753	0.000152809	0.000174708	0.000105928	9.45764e-05	0.000100237	0.000241271	0.000230541	0.000243751	0.000245156	0.000237778	0.000237217	0.000260311	0.000186372	0.000223218	0.000137657	0.000139299	0.000133742	0.00012588	0.000171192	0.000133717	0.000146057	9.58428e-05	0.000121221	0.000293516	0.000303123	0.000271654	0.000241724	0.000284277	0.00029575	0.000208735	0.00029292	0.00026156	0.000300461	0.000221947	0.000165643
K01093	4-phytase / acid phosphatase [EC:3.1.3.26 3.1.3.2]	4.68818e-07	8.87247e-07	6.84429e-07	3.77409e-07	3.91626e-07	3.12786e-07	2.13002e-07	1.44204e-07	8.96883e-08	1.36768e-07	2.30724e-07	1.74182e-07	2.29905e-06	3.86851e-08	2.80108e-06	0	0	1.05773e-06	2.50053e-07	2.74135e-07	3.02653e-07	4.88445e-07	2.09803e-07	3.99005e-07	8.2202e-08	1.06152e-07	1.58578e-07	1.42006e-07	1.59056e-07	8.27651e-08	4.46587e-08	4.03667e-08	1.22096e-07	2.03808e-08	1.479e-07	1.79025e-07
K01095	phosphatidylglycerophosphatase A [EC:3.1.3.27]	7.42575e-05	7.38417e-05	7.8398e-05	6.45856e-05	6.18693e-05	6.18593e-05	7.38131e-05	7.34512e-05	7.75016e-05	5.48662e-05	5.62175e-05	5.01701e-05	4.97358e-05	3.58468e-05	4.74916e-05	4.89781e-05	4.6942e-05	3.5396e-05	7.07381e-05	7.15392e-05	7.55052e-05	6.48522e-05	5.39135e-05	6.0155e-05	0.000106606	0.000110372	9.73309e-05	7.26937e-05	7.58254e-05	7.82427e-05	7.09109e-05	5.75419e-05	6.65361e-05	4.6511e-05	8.90993e-05	7.24137e-05
K01096	phosphatidylglycerophosphatase B [EC:3.1.3.27]	1.16931e-05	1.35588e-05	1.28507e-05	3.15735e-05	2.87669e-05	2.61402e-05	1.08616e-05	1.04068e-05	1.17583e-05	1.7007e-05	1.75301e-05	1.46318e-05	1.45593e-05	1.22481e-05	2.24975e-05	1.38892e-05	1.56173e-05	9.78508e-06	9.04662e-06	9.88521e-06	1.09899e-05	1.73493e-05	1.33328e-05	1.46728e-05	5.75589e-06	6.89795e-06	6.0822e-06	1.3801e-05	1.52462e-05	1.26967e-05	6.79711e-06	4.54556e-06	6.32236e-06	3.25633e-06	1.04199e-05	9.73106e-06
K01101	4-nitrophenyl phosphatase [EC:3.1.3.41]	0.000142384	0.000151889	0.000159928	0.000103218	0.000106774	0.000108733	0.000139415	0.000142307	0.000135841	0.000197399	0.000191618	0.000197398	0.000200352	0.000238361	0.000143428	0.000164628	0.000182363	0.000163636	0.000109869	0.00010341	0.000105163	8.71627e-05	0.000107906	9.84359e-05	6.68388e-05	6.29109e-05	7.26976e-05	7.30011e-05	6.26911e-05	5.73758e-05	0.000117116	0.000210041	0.000144494	0.000183574	7.84257e-05	9.4272e-05
K01103	6-phosphofructo-2-kinase / fructose-2,6-bisphosphatase [EC:2.7.1.105 3.1.3.46]	2.66267e-05	2.55666e-05	2.82193e-05	2.30754e-05	2.1141e-05	2.19453e-05	2.46829e-05	3.06623e-05	3.07705e-05	2.14615e-05	2.2804e-05	2.00958e-05	1.0803e-06	4.42818e-06	3.93718e-06	1.11864e-05	7.7419e-06	8.68134e-06	2.5495e-05	2.66404e-05	3.01411e-05	3.27165e-05	2.04063e-05	2.64132e-05	3.06695e-05	3.25355e-05	2.84058e-05	3.6934e-05	4.07774e-05	5.04952e-05	2.1003e-05	5.44723e-06	7.90166e-06	1.2098e-05	3.45355e-05	2.1769e-05
K01104	protein-tyrosine phosphatase [EC:3.1.3.48]	0.000259623	0.000253164	0.000245545	0.000280983	0.000287044	0.000280388	0.000222472	0.000225383	0.000219106	0.000235549	0.000243155	0.000246084	0.000215454	0.000231658	0.000276335	0.000261652	0.000263834	0.00025259	0.000255512	0.000228906	0.000253162	0.000211073	0.000252314	0.000232865	0.000210411	0.00020776	0.00021136	0.000157011	0.000128047	0.000113359	0.000234969	0.000196518	0.000213601	0.000158908	0.000219005	0.000243332
K01112	[EC:3.1.3.-]	3.32431e-06	3.12739e-06	2.83736e-06	1.00508e-05	9.38302e-06	8.22243e-06	5.32109e-06	4.7193e-06	5.41245e-06	3.62914e-06	3.62934e-06	3.40572e-06	1.04901e-05	6.07431e-06	2.16305e-05	6.00336e-06	8.12943e-06	5.48268e-06	1.73306e-06	1.79417e-06	2.21174e-06	6.42126e-06	5.39984e-06	5.44734e-06	1.69116e-06	2.24994e-06	1.79888e-06	2.5398e-06	3.88357e-06	4.64267e-06	5.00202e-06	2.91015e-06	3.58572e-06	1.30828e-06	4.39925e-06	3.93137e-06
K01113	alkaline phosphatase D [EC:3.1.3.1]	1.14932e-05	1.20383e-05	1.58454e-05	3.22362e-06	3.01132e-06	2.9685e-06	2.99149e-06	3.30266e-06	3.21216e-06	2.38451e-05	2.14469e-05	1.92497e-05	1.92262e-05	2.87747e-06	3.84949e-05	3.80301e-06	6.63126e-06	7.6343e-06	1.60821e-05	2.11678e-05	1.97419e-05	7.80352e-07	7.2386e-07	1.05662e-06	1.78521e-06	1.87347e-06	3.13143e-06	2.27197e-05	2.87877e-05	1.91754e-05	1.72197e-06	2.62441e-06	4.06443e-06	2.27745e-06	2.25765e-06	2.01628e-06
K01114	phospholipase C [EC:3.1.4.3]	2.3789e-05	2.24845e-05	2.15049e-05	3.21969e-05	3.2732e-05	3.16505e-05	1.98104e-05	2.11403e-05	1.7324e-05	1.11149e-05	1.16969e-05	1.25947e-05	5.10907e-05	2.09976e-05	5.90812e-05	2.33805e-05	2.92033e-05	3.71038e-05	2.40668e-05	2.06388e-05	2.3491e-05	2.09394e-05	2.61679e-05	2.38131e-05	1.28016e-05	1.20442e-05	1.42874e-05	1.22773e-05	9.96783e-06	1.01698e-05	2.04e-05	1.63985e-05	1.67798e-05	1.3434e-05	1.80924e-05	2.1627e-05
K01115	phospholipase D [EC:3.1.4.4]	3.66965e-06	3.15957e-06	3.85682e-06	2.98171e-06	2.81288e-06	2.86507e-06	2.95829e-06	3.45018e-06	3.80547e-06	2.34515e-06	2.2268e-06	2.74539e-06	2.10493e-06	6.75305e-07	4.98962e-06	1.5291e-06	1.41271e-06	2.35235e-06	3.4851e-06	3.60257e-06	4.06009e-06	2.03875e-06	1.65768e-06	2.01343e-06	3.78009e-06	3.99618e-06	3.35662e-06	2.76082e-06	1.18203e-06	8.58262e-07	5.60296e-07	6.14196e-07	9.11978e-07	1.09768e-06	4.32814e-06	2.90966e-06
K01117	sphingomyelin phosphodiesterase [EC:3.1.4.12]	1.46061e-06	1.48239e-06	1.87456e-06	6.84399e-06	6.57536e-06	5.66104e-06	2.99385e-07	0	5.79701e-08	4.61748e-07	0	7.21785e-07	0	0	1.553e-06	3.59774e-07	0	0	2.44968e-07	6.58955e-08	3.12569e-07	1.584e-06	1.45265e-06	1.72878e-06	1.1343e-08	0	0	8.70166e-08	5.9021e-08	1.66565e-09	3.26544e-08	1.42071e-08	4.88733e-08	4.31296e-08	1.50248e-08	1.5544e-07
K01118	FMN-dependent NADH-azoreductase [EC:1.7.-.-]	0.00013458	0.000133269	0.000129529	0.000135218	0.000139961	0.000140572	0.000104293	0.000104507	0.000100651	8.91294e-05	8.18715e-05	8.71673e-05	0.000110318	0.000123925	0.000115818	0.000130434	0.0001275	0.000141565	0.000153143	0.000145083	0.000150641	0.000125277	0.000147045	0.000138107	9.44574e-05	8.95646e-05	0.000103319	0.000112107	0.000103649	9.75194e-05	0.000119444	0.000102308	0.000109188	0.000112225	0.000111336	0.000128997
K01119	2',3'-cyclic-nucleotide 2'-phosphodiesterase [EC:3.1.4.16]	0.000802791	0.000790641	0.000764122	0.000709852	0.000744105	0.000744435	0.000530114	0.000524973	0.000506419	0.000360774	0.000327906	0.000351562	0.000530261	0.000680952	0.0006035	0.000767942	0.000814897	0.00071281	0.000809238	0.000707886	0.00078258	0.000626822	0.00079518	0.000723306	0.000464764	0.000438179	0.000502267	0.000375096	0.000267709	0.0002335	0.000627787	0.000495637	0.000535811	0.00047035	0.000584057	0.000714369
K01120	3',5'-cyclic-nucleotide phosphodiesterase [EC:3.1.4.17]	3.7291e-06	4.14923e-06	5.18305e-06	1.14526e-06	1.10686e-06	1.16767e-06	1.37237e-06	1.94948e-06	1.55512e-06	8.54894e-06	7.89705e-06	7.32717e-06	1.98214e-06	1.15855e-06	1.46947e-06	1.22231e-06	1.09126e-06	9.30704e-07	4.93142e-06	6.35408e-06	5.93865e-06	2.9574e-06	1.40474e-06	2.10901e-06	1.09195e-06	1.18066e-06	1.55269e-06	1.10164e-05	1.30483e-05	1.04157e-05	1.00884e-06	1.55936e-06	2.07745e-06	9.78442e-07	1.14958e-06	1.0392e-06
K01126	glycerophosphoryl diester phosphodiesterase [EC:3.1.4.46]	0.000573736	0.000569419	0.000566008	0.000519185	0.000537741	0.000540226	0.000492953	0.000503636	0.000487035	0.000491142	0.000483984	0.00049323	0.00051628	0.00059349	0.000553149	0.000567145	0.000575171	0.000579681	0.000591386	0.000542424	0.000585905	0.000451826	0.000553521	0.000508569	0.00041868	0.000405187	0.000434234	0.000338434	0.000278526	0.000247182	0.000494609	0.000501833	0.000474935	0.00045339	0.000455685	0.000508694
K01127	glycosylphosphatidylinositol phospholipase D [EC:3.1.4.50]	1.50022e-09	7.54043e-10	6.27791e-10	2.27912e-10	0	8.33626e-11	1.35864e-09	0	2.29347e-10	0	1.06324e-08	3.47413e-09	3.55144e-08	5.97587e-10	3.53607e-08	0	0	1.63393e-08	5.76979e-11	1.36747e-10	0	0	0	0	0	0	0	1.40087e-09	0	1.79084e-09	0	1.19422e-10	8.78434e-10	8.01166e-10	3.62825e-09	2.45434e-09
K01128	[EC:3.1.4.-]	3.99868e-06	3.2406e-06	3.25657e-06	1.37433e-05	1.31945e-05	1.19397e-05	4.10803e-06	6.53325e-06	4.73623e-06	2.06572e-05	2.44599e-05	2.42776e-05	2.97866e-07	3.11556e-07	3.5377e-06	4.50609e-06	1.03777e-06	6.42274e-06	3.30015e-07	1.1159e-07	3.8834e-07	2.32936e-06	2.83495e-06	2.66985e-06	2.81096e-07	1.22162e-07	2.0419e-07	1.9711e-06	1.27518e-06	7.65468e-07	2.6846e-07	2.29963e-07	2.94669e-07	1.69533e-07	5.44296e-07	1.13057e-06
K01129	dGTPase [EC:3.1.5.1]	0.000199808	0.000198849	0.000205574	0.000240842	0.000232058	0.000226125	0.000232889	0.000231793	0.000234713	0.000292219	0.000300797	0.000297991	0.000216322	0.000167566	0.000247972	0.000206358	0.000205047	0.000192668	0.000185775	0.000223478	0.000190508	0.000262903	0.000199739	0.00022839	0.000267547	0.000274382	0.000263113	0.00037864	0.000419488	0.000420273	0.000223266	0.000220775	0.000244051	0.000258772	0.000253046	0.000229532
K01130	arylsulfatase [EC:3.1.6.1]	3.68798e-05	3.27837e-05	3.74628e-05	2.53735e-05	2.1372e-05	2.33276e-05	3.87708e-05	4.11565e-05	4.75635e-05	1.68888e-05	1.46204e-05	1.18742e-05	2.19727e-05	1.16765e-05	0.000151022	1.64665e-05	4.07416e-05	1.76655e-05	3.66506e-05	3.84138e-05	4.26585e-05	4.81019e-05	3.83874e-05	4.15777e-05	5.62155e-05	5.90474e-05	4.96747e-05	4.81274e-06	4.27328e-06	3.51515e-06	1.85409e-05	1.68523e-05	2.14471e-05	1.66915e-05	5.18505e-05	3.48773e-05
K01133	choline-sulfatase [EC:3.1.6.6]	1.0004e-06	1.22442e-06	1.25517e-06	7.15291e-07	8.64436e-07	9.92329e-07	5.32475e-07	4.04127e-07	3.00955e-07	1.40129e-06	1.93224e-06	1.53308e-06	7.32203e-06	2.5219e-07	5.72041e-06	2.72549e-07	5.20804e-07	3.28009e-06	1.53663e-06	1.8193e-06	2.31556e-06	1.30707e-06	2.21976e-06	1.11482e-06	2.32788e-07	1.3782e-07	2.22801e-07	6.40511e-06	9.11064e-06	2.13775e-05	2.31363e-05	3.80315e-06	5.21425e-06	5.63608e-06	3.17186e-06	3.44524e-07
K01134	arylsulfatase A [EC:3.1.6.8]	1.29276e-06	1.23949e-06	1.35331e-06	8.38218e-07	7.50816e-07	7.79703e-07	1.01851e-06	1.18052e-06	1.30446e-06	4.35389e-07	4.34955e-07	3.45414e-07	1.80895e-07	1.71942e-07	2.97999e-07	5.23927e-07	2.32324e-07	4.86012e-07	1.25256e-06	1.31319e-06	1.47255e-06	6.50886e-07	5.22305e-07	6.67985e-07	1.31233e-06	1.3874e-06	1.18096e-06	1.12502e-07	1.10547e-07	7.9081e-08	1.23161e-07	7.81293e-08	1.4596e-07	3.97601e-07	1.46695e-06	9.53559e-07
K01135	arylsulfatase B [EC:3.1.6.12]	2.93842e-09	1.47692e-09	7.19673e-10	0	0	1.63279e-10	2.66112e-09	0	4.49214e-10	0	4.8939e-09	1.34236e-09	6.95609e-08	1.17047e-09	4.95046e-08	0	0	3.20031e-08	2.44272e-10	0	0	0	0	0	0	0	0	0	0	0	0	5.05587e-10	4.95364e-10	0	0	1.33727e-09
K01136	iduronate 2-sulfatase [EC:3.1.6.13]	1.44364e-06	1.25409e-06	1.39202e-06	3.67068e-07	3.9367e-07	4.32738e-07	1.0421e-05	8.26836e-06	9.60343e-06	1.63792e-06	1.3468e-06	1.24377e-06	9.82662e-06	2.86459e-06	7.5915e-06	1.67317e-06	8.52632e-07	6.61885e-07	3.1552e-06	3.52066e-06	3.36544e-06	3.94695e-07	3.59398e-07	3.18458e-07	2.01891e-05	2.10632e-05	1.73708e-05	1.129e-06	1.32214e-06	1.30766e-06	1.13438e-05	1.11289e-05	1.27496e-05	5.83268e-06	1.06303e-05	7.2775e-06
K01137	N-acetylglucosamine-6-sulfatase [EC:3.1.6.14]	3.85895e-10	0	3.58667e-08	8.6497e-08	1.0204e-07	9.03174e-08	0	1.43222e-08	0	1.66521e-07	1.18771e-07	2.66546e-07	0	0	1.82128e-08	0	0	0	1.30846e-08	3.6482e-09	9.01779e-09	4.87669e-08	2.54452e-08	2.72142e-08	9.99709e-10	2.25922e-09	1.41608e-09	3.87331e-07	1.41088e-07	9.38589e-08	8.97241e-10	0	4.12849e-10	2.39361e-09	9.08231e-09	1.07469e-08
K01138	uncharacterized sulfatase [EC:3.1.6.-]	1.57513e-05	1.56123e-05	1.97738e-05	7.2058e-05	6.93754e-05	6.03991e-05	1.85654e-05	1.70419e-05	1.42651e-05	8.2318e-06	2.66041e-06	1.19813e-05	1.48643e-05	3.32011e-06	2.29027e-05	7.94181e-06	5.11996e-06	9.07138e-07	5.96672e-06	4.6551e-06	6.87085e-06	1.92943e-05	1.72993e-05	1.97849e-05	2.09075e-05	2.16702e-05	1.83876e-05	5.62068e-06	3.47636e-06	2.28649e-06	1.25689e-05	1.32064e-05	1.4321e-05	7.13112e-06	1.3393e-05	1.07913e-05
K01139	guanosine-3',5'-bis(diphosphate) 3'-pyrophosphohydrolase [EC:3.1.7.2]	6.33889e-05	6.36974e-05	6.52475e-05	8.25408e-05	7.99064e-05	7.45925e-05	9.97167e-05	8.80007e-05	9.72381e-05	8.39512e-05	8.08623e-05	7.33079e-05	0.000124659	7.2039e-05	0.000127143	6.91366e-05	6.95283e-05	6.06337e-05	7.42799e-05	7.97985e-05	8.29953e-05	6.14474e-05	5.47761e-05	5.59424e-05	0.000130641	0.000137517	0.000120173	7.84813e-05	8.46462e-05	6.83052e-05	9.51558e-05	8.42671e-05	9.8942e-05	5.18883e-05	9.92296e-05	8.36845e-05
K01141	exodeoxyribonuclease I [EC:3.1.11.1]	9.35452e-06	9.96254e-06	1.3045e-05	1.25663e-06	1.58391e-06	1.31749e-06	2.5505e-06	2.61808e-06	2.56726e-06	2.08717e-05	2.05416e-05	1.7101e-05	1.51688e-05	2.48249e-06	1.21836e-05	3.09363e-06	2.01216e-06	6.52471e-06	1.40429e-05	1.84585e-05	1.71622e-05	1.65585e-06	1.25932e-06	1.85156e-06	1.59737e-06	1.62827e-06	2.78194e-06	2.01475e-05	2.53471e-05	1.67477e-05	1.61754e-06	2.30674e-06	3.53371e-06	1.9623e-06	2.06174e-06	1.90842e-06
K01142	exodeoxyribonuclease III [EC:3.1.11.2]	0.000294038	0.000291126	0.000287519	0.000293834	0.000294567	0.000297145	0.000288394	0.000288006	0.000290661	0.000285124	0.000285413	0.000282246	0.000272979	0.0002605	0.000320737	0.000286925	0.000277027	0.000304688	0.000329002	0.000337558	0.000331526	0.000304583	0.000310597	0.000308408	0.000314853	0.000313011	0.000317754	0.000325441	0.000328776	0.000320363	0.000296351	0.000265069	0.000289679	0.000298326	0.000314052	0.000313752
K01143	exodeoxyribonuclease (lambda-induced) [EC:3.1.11.3]	0	0	8.68997e-09	0	0	0	0	0	0	0	1.74172e-07	5.97174e-08	0	0	8.42419e-07	0	0	0	8.3347e-09	9.1283e-09	0	0	0	0	0	0	0	2.99974e-08	0	3.26605e-08	1.83326e-08	1.72509e-08	5.07873e-08	1.46113e-08	7.7693e-08	6.96931e-08
K01144	exodeoxyribonuclease V [EC:3.1.11.5]	0.000323686	0.000317776	0.000301022	0.000345704	0.000356054	0.000346369	0.00022562	0.000223129	0.000217655	0.000180664	0.000170608	0.000179969	0.000249897	0.000308739	0.000291423	0.000342333	0.000364458	0.000315684	0.000317154	0.000275438	0.000309448	0.000270431	0.000335892	0.000304318	0.000165428	0.000158629	0.000183012	0.000166294	0.000137289	0.000139532	0.000286833	0.000209227	0.000226297	0.000182035	0.000242485	0.000293182
K01145	exodeoxyribonuclease VII [EC:3.1.11.6]	0	0	0	0	0	0	0	0	0	0	0	0	0	0	1.34188e-07	0	0	0	8.74002e-10	0	0	0	0	0	0	0	0	0	0	0	0	1.80898e-09	1.77241e-09	0	0	1.53141e-09
K01146	protein Xni	2.97051e-06	2.22004e-06	1.89882e-06	6.88178e-06	6.63415e-06	6.21932e-06	3.4273e-06	5.68509e-06	4.39885e-06	1.96716e-05	2.44088e-05	2.34775e-05	5.1061e-07	4.29011e-07	5.25319e-06	3.91685e-06	5.15536e-07	6.80789e-06	2.27345e-07	1.63178e-07	1.96476e-07	7.96807e-07	1.43251e-06	1.06413e-06	2.28021e-07	7.41623e-08	1.2811e-07	1.89798e-06	1.25952e-06	7.84228e-07	3.58957e-07	3.90138e-07	6.49573e-07	1.33907e-07	2.61227e-07	9.05161e-07
K01147	exoribonuclease II [EC:3.1.13.1]	0.000173347	0.000162351	0.000181556	0.000122948	0.000112627	0.000124016	0.000280152	0.000264206	0.000291041	0.000192631	0.00019049	0.00019896	0.000202535	9.78628e-05	0.000119871	0.000145126	8.12591e-05	0.000169147	0.000189041	0.0002723	0.000193852	0.000193782	0.000132929	0.000171414	0.000432398	0.000439591	0.000406865	0.000336242	0.000403822	0.000454474	0.000266929	0.000278161	0.000300506	0.000427966	0.000357553	0.000267584
K01150	deoxyribonuclease I [EC:3.1.21.1]	1.42502e-05	1.38764e-05	1.66712e-05	6.79268e-06	6.4087e-06	6.2706e-06	8.69146e-06	1.00855e-05	1.09347e-05	1.4922e-05	1.47297e-05	1.21226e-05	4.97042e-06	2.56358e-06	5.53449e-06	5.59227e-06	2.87435e-06	5.07294e-06	1.6479e-05	1.94325e-05	1.97822e-05	5.68648e-06	4.59795e-06	5.93453e-06	1.04418e-05	1.09822e-05	1.00986e-05	1.21078e-05	1.49701e-05	9.93766e-06	1.80929e-06	1.84604e-06	2.996e-06	3.70978e-06	1.18393e-05	7.94609e-06
K01151	deoxyribonuclease IV [EC:3.1.21.2]	0.000299758	0.000309713	0.000319766	0.000269505	0.000265578	0.000268935	0.000310548	0.000312195	0.000308713	0.000358376	0.000356087	0.000362414	0.000345847	0.000360989	0.000264181	0.000315993	0.000325852	0.000306849	0.000252596	0.000268456	0.0002458	0.000279096	0.000269224	0.000275524	0.000267635	0.000265632	0.000269375	0.000289499	0.000302926	0.000317309	0.000292386	0.000380753	0.000325597	0.000398025	0.000273466	0.000271755
K01153	type I restriction enzyme, R subunit [EC:3.1.21.3]	0.00146147	0.00146587	0.00144644	0.00172047	0.00169645	0.00168587	0.00145149	0.00151724	0.00147817	0.00203801	0.0021039	0.0021192	0.00138893	0.00146864	0.00142676	0.00159012	0.00151669	0.00169055	0.00143902	0.00156137	0.00142719	0.00192945	0.00171763	0.00179437	0.00127784	0.00126512	0.00135486	0.00222266	0.00232231	0.00233361	0.00139875	0.0014216	0.00145224	0.00176122	0.00146546	0.00150845
K01154	type I restriction enzyme, S subunit [EC:3.1.21.3]	0.000548324	0.000553726	0.00055041	0.000640225	0.000629035	0.000628021	0.000545991	0.000575541	0.000556815	0.00080142	0.000821402	0.000830421	0.000521323	0.000549996	0.000515507	0.000590961	0.000564663	0.000630274	0.000543582	0.000600012	0.000539904	0.000754192	0.000653907	0.00069154	0.000483646	0.000478923	0.000514346	0.000906081	0.000955617	0.000960129	0.000527756	0.000549366	0.000555181	0.000688957	0.000551904	0.000564417
K01155	type II restriction enzyme [EC:3.1.21.4]	2.88956e-05	3.01124e-05	3.07147e-05	2.95403e-05	2.69307e-05	2.60295e-05	4.81431e-05	4.25319e-05	4.69053e-05	3.70292e-05	4.3321e-05	3.90103e-05	3.82961e-05	1.2602e-05	3.16247e-05	2.26606e-05	2.17084e-05	9.86792e-06	2.01968e-05	2.14931e-05	2.01669e-05	1.67757e-05	1.28649e-05	1.50709e-05	8.55008e-05	8.89524e-05	7.35673e-05	2.05799e-05	1.84116e-05	1.77645e-05	4.71341e-05	4.65974e-05	5.37476e-05	2.88427e-05	5.17565e-05	4.04227e-05
K01156	type III restriction enzyme [EC:3.1.21.5]	0.000244294	0.000253955	0.000236944	0.000335229	0.000328255	0.000317144	0.00033683	0.000309779	0.000322202	0.000248962	0.000246202	0.000228749	0.000346737	0.000277984	0.000364739	0.000276689	0.0003081	0.00022502	0.000254798	0.000236034	0.000256776	0.000322275	0.000288017	0.000293974	0.000424955	0.000440199	0.000398193	0.00031159	0.000302341	0.000290009	0.00035421	0.000308063	0.000349834	0.000206995	0.000335791	0.000321109
K01157	[EC:3.1.21.-]	0	0	0	0	7.56934e-10	0	0	0	0	0	1.01617e-07	3.48408e-08	0	0	0	6.00006e-10	0	0	0	0	0	0	0	0	1.44608e-10	0	0	1.75013e-08	0	1.90551e-08	0	0	0	8.52464e-09	4.53283e-08	2.35998e-08
K01158	deoxyribonuclease II [EC:3.1.22.1]	4.23294e-09	2.12757e-09	3.90317e-09	2.5092e-09	0	2.35212e-10	3.83347e-09	0	6.47114e-10	0	7.04989e-09	1.93373e-09	1.00206e-07	1.68612e-09	4.0556e-07	0	0	4.6102e-08	0	1.50552e-09	0	0	0	0	0	0	0	0	0	2.92414e-09	0	0	8.38295e-09	1.30817e-09	0	1.30983e-09
K01159	crossover junction endodeoxyribonuclease RuvC [EC:3.1.22.4]	0.000131179	0.00013051	0.000129394	0.000138248	0.000136345	0.000135166	0.000126783	0.000123704	0.000128974	0.000107934	0.000105587	0.000102269	0.000119492	0.00011324	0.000136063	0.000125759	0.000126513	0.000120121	0.000136292	0.000138391	0.000139062	0.000133516	0.000129676	0.000131766	0.000137979	0.000139647	0.000137166	0.000136659	0.000140583	0.000141239	0.000130402	0.00011086	0.000123079	0.000116677	0.000141677	0.000136901
K01160	crossover junction endodeoxyribonuclease RusA [EC:3.1.22.4]	0	0	1.44381e-08	0	0	0	0	0	0	0	8.60459e-10	2.95021e-10	0	0	1.40019e-06	0	0	0	1.38532e-08	1.51663e-08	0	0	0	0	0	0	0	1.48196e-10	0	1.61352e-10	3.0459e-08	2.86729e-08	8.43922e-08	7.2184e-11	3.83826e-10	4.87953e-08
K01161	deoxyribonuclease (pyrimidine dimer) [EC:3.1.25.1]	4.90701e-09	2.46637e-09	1.20182e-09	0	0	2.72668e-10	4.44393e-09	0	7.50163e-10	0	3.28453e-08	1.07011e-08	1.16163e-07	1.95463e-09	6.05147e-08	0	0	5.34435e-08	1.88722e-10	0	0	0	0	0	0	0	0	4.24936e-09	0	4.6266e-09	0	3.90612e-10	3.82714e-10	2.0698e-09	1.10058e-08	7.57916e-09
K01163	hypothetical protein	0.000238317	0.000233239	0.000232158	0.000216955	0.000218851	0.000228354	0.000232952	0.000235003	0.000234992	0.000208448	0.000202025	0.000212426	0.000191281	0.000204526	0.000161378	0.000233191	0.000204586	0.000264377	0.000267677	0.000296728	0.000260926	0.000283561	0.000269492	0.000280285	0.000257204	0.000250247	0.000269015	0.000337005	0.000360097	0.000384143	0.000251358	0.000241592	0.00025344	0.000349513	0.000276742	0.000272364
K01166	ribonuclease T2 [EC:3.1.27.1]	9.31905e-09	4.68396e-09	2.40477e-09	0	0	5.17832e-10	8.4396e-09	0	1.42466e-09	0	1.17437e-07	3.92007e-08	2.20608e-07	3.71209e-09	1.85923e-07	0	0	1.01496e-07	8.16001e-10	1.28541e-10	0	0	0	0	0	0	0	1.75529e-08	0	1.91112e-08	2.58153e-10	1.68894e-09	2.13194e-09	8.54976e-09	4.54618e-08	2.81889e-08
K01167	ribonuclease T1 [EC:3.1.27.3]	1.27132e-07	4.18047e-08	8.88436e-08	3.44929e-08	1.49774e-08	4.62168e-09	7.5324e-08	1.16537e-08	9.73906e-08	0	1.38524e-07	3.79959e-08	1.96895e-06	3.31306e-08	9.2095e-06	1.18722e-08	1.49277e-06	9.20592e-07	2.54899e-09	1.05172e-08	0	0	0	0	2.86133e-09	0	0	0	0	2.04274e-08	0	5.27582e-09	6.37305e-08	9.13858e-09	0	3.02032e-08
K01169	ribonuclease I (enterobacter ribonuclease) [EC:3.1.27.6]	1.44719e-08	6.66931e-09	3.36438e-08	7.10944e-07	9.73579e-07	5.42239e-07	1.80951e-07	0	7.15393e-08	1.90325e-07	1.64329e-06	5.38832e-07	3.14116e-07	5.2855e-09	1.32874e-06	0	0	5.95992e-07	7.06148e-08	3.33198e-08	4.68494e-08	1.13601e-06	8.19598e-07	1.08891e-06	4.67431e-08	7.0423e-09	4.56121e-08	3.09855e-07	2.09785e-07	1.10158e-07	6.69171e-08	2.48046e-08	7.04473e-08	4.4441e-08	1.80973e-07	1.97104e-07
K01170	tRNA-intron endonuclease, archaea type [EC:3.1.27.9]	5.88777e-05	6.61186e-05	7.50856e-05	3.15741e-05	2.66563e-05	3.41646e-05	0.00010286	9.46516e-05	9.87111e-05	0.000141279	0.000134414	0.00014703	0.00013604	0.000114673	5.11562e-05	8.76448e-05	7.45998e-05	0.000107745	4.42624e-05	9.41084e-05	3.53959e-05	8.73273e-05	5.94031e-05	7.4803e-05	0.000103808	0.000100441	0.000108296	0.000167468	0.000210631	0.000232773	0.000103321	0.000184465	0.000150365	0.000273106	9.52026e-05	8.19868e-05
K01172	[EC:3.1.27.-]	1.50672e-09	7.5731e-10	3.69023e-10	0	0	8.37238e-11	1.36453e-09	0	2.30341e-10	0	1.344e-08	4.43602e-09	3.56683e-08	6.00176e-10	2.25824e-08	0	0	1.64101e-08	5.79479e-11	0	0	0	0	0	0	0	0	1.88256e-09	0	2.04968e-09	0	1.19939e-10	1.17514e-10	9.16965e-10	4.8758e-09	3.10632e-09
K01173	endonuclease G, mitochondrial	6.23254e-06	7.66636e-06	7.70997e-06	1.4014e-05	1.30039e-05	1.40438e-05	1.31466e-05	1.64864e-05	1.30093e-05	2.77693e-05	3.01984e-05	2.9343e-05	1.10063e-05	6.9857e-06	1.0916e-05	5.60049e-06	7.90673e-06	1.05559e-05	6.33051e-06	9.65316e-06	5.44641e-06	4.53665e-05	2.41148e-05	3.24182e-05	1.48569e-05	1.52975e-05	1.62227e-05	6.55679e-05	7.23107e-05	7.54298e-05	1.15038e-05	1.51124e-05	1.62504e-05	1.99651e-05	1.27468e-05	1.15925e-05
K01174	micrococcal nuclease [EC:3.1.31.1]	3.40047e-05	4.11499e-05	4.42043e-05	4.66848e-05	4.15968e-05	3.93838e-05	5.26119e-05	4.92487e-05	5.21406e-05	7.22088e-05	7.01122e-05	6.75955e-05	8.12991e-05	7.62995e-05	5.5328e-05	4.80923e-05	5.49071e-05	3.9554e-05	1.8108e-05	2.40623e-05	2.00196e-05	3.04904e-05	2.48397e-05	2.61275e-05	3.40943e-05	3.63486e-05	3.18804e-05	2.67937e-05	3.19795e-05	3.21061e-05	4.40308e-05	7.6261e-05	5.55972e-05	6.45071e-05	3.13272e-05	2.56524e-05
K01175	[EC:3.1.-.-]	0.000114888	0.00011325	0.000110478	0.000116852	0.0001204	0.000120841	9.51393e-05	9.58203e-05	9.3024e-05	7.71289e-05	7.32595e-05	7.5223e-05	0.000101329	0.000105145	0.000187693	0.000107198	0.000127673	0.000115787	0.000129438	0.000117221	0.000128179	0.000116962	0.00012921	0.000123248	9.31529e-05	9.06303e-05	9.74603e-05	0.000102519	9.24095e-05	8.92201e-05	0.000110565	8.83368e-05	9.65651e-05	8.00326e-05	9.8869e-05	0.000110974
K01176	alpha-amylase [EC:3.2.1.1]	0.000223925	0.0002393	0.000259346	0.000161983	0.000164438	0.000166288	0.000187111	0.000198305	0.00018045	0.000281201	0.000261363	0.000265369	0.000263234	0.00029825	0.000189633	0.000221449	0.000259874	0.00018788	0.000178606	0.000173204	0.000179993	0.00016906	0.00017467	0.00017053	8.361e-05	7.98071e-05	9.56784e-05	0.000169832	0.000167103	0.000136358	0.00014643	0.000253369	0.000180017	0.000206193	0.00010816	0.000131628
K01178	glucoamylase [EC:3.2.1.3]	2.13544e-05	2.14983e-05	2.10313e-05	3.00053e-05	2.8263e-05	2.52362e-05	1.06678e-05	7.8466e-06	1.01537e-05	1.01401e-05	9.84526e-06	9.32038e-06	2.51439e-05	1.83921e-05	5.09681e-05	2.54839e-05	3.60573e-05	1.59467e-05	6.06426e-06	6.01342e-06	6.39488e-06	2.48197e-05	2.09941e-05	2.16156e-05	2.72831e-06	3.65786e-06	3.17369e-06	3.8608e-06	4.80252e-06	6.85083e-06	1.65779e-05	8.70712e-06	1.18124e-05	7.5482e-06	1.38508e-05	1.58119e-05
K01179	endoglucanase [EC:3.2.1.4]	0.00101095	0.00102806	0.00105662	0.000765798	0.000787162	0.000804235	0.000875103	0.000870296	0.000844182	0.000977557	0.000935821	0.000970271	0.00107332	0.00117245	0.000832991	0.00102954	0.00109438	0.000988199	0.000891595	0.000882175	0.000861737	0.000746477	0.000853569	0.00081375	0.000680034	0.000654499	0.000713536	0.00070452	0.000679164	0.000644641	0.000861436	0.00112386	0.00094927	0.00109982	0.000736967	0.000829899
K01180	endo-1,3(4)-beta-glucanase [EC:3.2.1.6]	6.97311e-07	7.06781e-07	8.92983e-07	3.31396e-06	3.17724e-06	2.74613e-06	1.78235e-07	6.65658e-08	5.33929e-08	2.22969e-07	9.1242e-10	3.57275e-07	2.21062e-08	0	4.83438e-07	1.91674e-07	3.87577e-08	0	1.14008e-07	3.20662e-08	1.49536e-07	7.67015e-07	7.04406e-07	8.34792e-07	8.2345e-09	4.00917e-09	6.70117e-09	4.24311e-08	2.90996e-08	1.02658e-09	1.98151e-08	1.20149e-08	1.92936e-08	2.57194e-08	2.96302e-08	8.49057e-08
K01181	endo-1,4-beta-xylanase [EC:3.2.1.8]	9.78808e-05	8.78118e-05	8.73996e-05	0.000103722	0.000103087	0.000103094	8.94943e-05	8.68698e-05	8.51944e-05	6.77876e-05	6.8022e-05	7.03885e-05	0.000108389	8.01815e-05	0.000114922	9.55149e-05	0.000100632	9.23206e-05	8.00884e-05	8.6199e-05	7.65984e-05	8.1238e-05	8.71866e-05	8.69936e-05	6.49176e-05	6.2334e-05	7.16272e-05	7.80613e-05	8.40907e-05	8.61278e-05	8.40045e-05	9.05366e-05	8.69056e-05	0.000104022	7.91257e-05	8.85733e-05
K01182	oligo-1,6-glucosidase [EC:3.2.1.10]	0.000516939	0.000512082	0.000494747	0.000488667	0.000512277	0.000512165	0.000360437	0.000365286	0.000344729	0.000277323	0.000247276	0.000266306	0.000372614	0.000488455	0.000425246	0.000505361	0.00052949	0.00049368	0.000554618	0.000484518	0.000541901	0.000416992	0.000539161	0.000484742	0.000284426	0.00026522	0.000315602	0.000256226	0.000183253	0.000150376	0.000416808	0.000347888	0.000358328	0.00031368	0.00036663	0.000455584
K01183	chitinase [EC:3.2.1.14]	0.000188171	0.000195224	0.000204073	0.000185046	0.000183391	0.000185423	0.000223284	0.000226338	0.000214281	0.000236177	0.000225199	0.000241413	0.000263349	0.000259415	0.000217914	0.000214939	0.00022286	0.000218426	0.000164819	0.00018512	0.000157901	0.000185717	0.000174514	0.000182202	0.000189451	0.00018697	0.000194091	0.000226486	0.00024294	0.000251944	0.000203964	0.000293225	0.000247939	0.000314054	0.000189126	0.000186749
K01184	polygalacturonase [EC:3.2.1.15]	2.43358e-07	1.22002e-07	6.79046e-08	4.3499e-09	2.05252e-09	1.34878e-08	2.19824e-07	1.66108e-10	3.83147e-08	0	4.10782e-07	1.13121e-07	5.74614e-06	9.66879e-08	3.88122e-06	1.62699e-09	2.12775e-08	2.64386e-06	1.09479e-08	5.69155e-09	0	0	0	0	3.92122e-10	0	0	1.12234e-09	0	6.00941e-09	6.48028e-09	2.26597e-08	4.7904e-08	2.68842e-09	2.90684e-09	1.00981e-07
K01185	lysozyme [EC:3.2.1.17]	6.01968e-05	5.92034e-05	5.57729e-05	5.5093e-05	5.81357e-05	5.944e-05	4.81776e-05	4.76112e-05	4.60848e-05	3.45668e-05	3.23437e-05	3.44431e-05	5.34645e-05	6.0469e-05	5.9491e-05	6.26166e-05	6.23095e-05	6.91707e-05	7.00199e-05	6.47518e-05	6.75024e-05	5.4516e-05	6.82819e-05	6.21404e-05	4.33172e-05	4.06482e-05	4.75101e-05	4.2955e-05	3.66467e-05	3.57626e-05	5.82041e-05	4.91794e-05	5.21483e-05	5.36382e-05	5.16944e-05	6.14625e-05
K01186	sialidase-1 [EC:3.2.1.18]	4.86079e-06	3.97059e-06	4.97026e-06	8.26015e-06	7.96159e-06	7.4439e-06	6.76009e-06	1.05861e-05	7.16333e-06	2.19799e-06	1.69755e-06	2.8704e-06	2.79242e-06	5.14338e-07	5.74944e-05	5.08984e-06	1.55546e-05	1.52123e-06	3.67645e-06	3.98503e-06	4.22903e-06	3.14982e-06	2.87456e-06	3.1076e-06	4.43707e-06	4.54822e-06	4.19053e-06	4.36459e-07	3.97813e-07	4.22958e-07	8.45132e-07	1.53449e-06	1.31672e-06	1.89533e-06	6.96678e-06	4.99916e-06
K01187	alpha-glucosidase [EC:3.2.1.20]	0.00102042	0.00101039	0.000992374	0.000877702	0.000917295	0.000917015	0.0006581	0.000670923	0.000633467	0.000571536	0.000532239	0.000556496	0.000697493	0.000880269	0.000832612	0.000973539	0.00105722	0.000891247	0.000999406	0.000885886	0.000974473	0.000753149	0.000957071	0.000870518	0.000506424	0.000473537	0.000560661	0.000497724	0.000384441	0.000323844	0.000748374	0.00063254	0.000648695	0.000585672	0.000685232	0.000849462
K01190	beta-galactosidase [EC:3.2.1.23]	0.000145602	0.000158243	0.000186551	6.59704e-05	6.37421e-05	6.2928e-05	0.000128274	0.000134628	0.000119994	0.000189952	0.000181665	0.000188058	0.000234087	0.000214332	0.000127321	0.000147429	0.000205285	8.56413e-05	2.15402e-05	2.76187e-05	1.51362e-05	2.50611e-05	2.03966e-05	2.77224e-05	1.1758e-05	1.08476e-05	1.33261e-05	1.72463e-05	2.2011e-05	1.54086e-05	4.89924e-05	0.000209253	0.000106563	0.00017728	3.12992e-05	4.00519e-05
K01191	alpha-mannosidase [EC:3.2.1.24]	0.000225607	0.000231111	0.000245103	0.000141006	0.000145379	0.000145449	0.00015803	0.000161865	0.000148743	0.000153219	0.000145828	0.000151655	0.000216751	0.000222202	0.000165401	0.000213838	0.000264199	0.000153823	0.00014037	0.000126088	0.000130517	0.00010961	0.000136243	0.000128647	7.11285e-05	6.56485e-05	7.93691e-05	6.02293e-05	4.52327e-05	3.46298e-05	0.000119578	0.000183849	0.000134572	0.000166895	0.000109251	0.000139398
K01192	beta-mannosidase [EC:3.2.1.25]	5.97226e-05	5.83576e-05	6.47461e-05	2.8069e-05	2.77047e-05	2.60696e-05	1.08765e-05	9.42642e-06	8.23488e-06	2.35522e-06	5.2788e-06	4.63864e-06	2.51422e-05	1.37453e-06	2.47376e-05	3.76803e-05	5.79505e-05	6.21984e-06	1.24336e-05	1.28685e-05	8.42033e-06	1.23866e-05	1.10146e-05	1.57428e-05	3.56338e-06	2.53226e-06	3.84477e-06	1.22139e-06	1.93006e-06	1.11881e-06	2.21677e-06	2.45697e-06	3.28924e-06	1.52125e-05	1.8843e-05	2.66194e-05
K01193	beta-fructofuranosidase [EC:3.2.1.26]	0.000321329	0.000316391	0.000305089	0.000279424	0.000294253	0.000294094	0.000205371	0.000204738	0.000195932	0.000141538	0.000126674	0.000136406	0.000211253	0.000273362	0.00027252	0.000309739	0.000337874	0.000285462	0.000320559	0.000277487	0.000308962	0.000246521	0.000317583	0.000286773	0.000165454	0.000153841	0.000183201	0.000138955	9.36542e-05	7.89329e-05	0.000242564	0.000188328	0.000203183	0.000178659	0.000222651	0.000280365
K01194	alpha,alpha-trehalase [EC:3.2.1.28]	3.39295e-05	4.20563e-05	4.19582e-05	5.46409e-05	4.42488e-05	4.49412e-05	2.10367e-05	2.46824e-05	3.00161e-05	4.39293e-05	5.15582e-05	3.09418e-05	1.23364e-05	5.998e-06	3.66884e-05	1.3376e-05	1.16263e-05	1.22769e-05	4.25721e-05	4.78356e-05	4.97681e-05	2.48148e-05	2.17217e-05	2.36484e-05	2.65459e-05	2.82848e-05	2.46353e-05	2.64064e-05	3.04322e-05	2.14995e-05	4.27188e-06	4.36121e-06	7.24932e-06	8.88359e-06	2.91308e-05	1.99588e-05
K01195	beta-glucuronidase [EC:3.2.1.31]	1.34281e-06	8.70597e-07	1.49033e-06	6.41953e-06	6.03775e-06	6.07708e-06	8.19218e-06	8.66163e-06	7.5115e-06	5.15419e-07	6.25054e-07	3.22606e-07	1.17061e-05	1.17065e-06	9.96392e-06	1.01464e-06	2.64657e-06	1.54438e-07	2.31577e-07	3.86742e-07	1.82988e-07	1.37561e-06	1.10069e-06	1.60334e-06	8.13993e-07	8.68908e-07	1.44332e-06	5.04429e-08	9.53719e-07	7.92335e-08	5.58315e-07	1.20924e-06	9.16638e-07	5.80044e-07	7.61829e-07	8.4083e-07
K01197	hyaluronoglucosaminidase [EC:3.2.1.35]	3.23423e-07	7.74686e-08	7.59215e-08	1.07502e-05	1.05745e-05	9.84758e-06	7.38025e-06	1.3661e-05	5.31726e-06	2.08405e-06	9.90599e-07	3.7782e-06	6.94175e-06	4.04806e-08	5.53868e-06	5.42383e-06	8.23942e-06	1.10965e-06	1.07909e-07	2.22467e-07	1.09807e-07	2.63109e-06	2.56508e-06	2.27981e-06	8.89831e-07	8.22649e-07	1.37503e-06	3.35356e-07	2.92883e-07	2.19508e-07	8.71812e-07	2.47449e-06	1.04047e-06	1.15829e-06	4.65934e-06	3.5805e-06
K01198	xylan 1,4-beta-xylosidase [EC:3.2.1.37]	0.000291251	0.000286386	0.000267483	0.000269558	0.000286072	0.000291173	0.000212967	0.000212895	0.000205229	0.000143938	0.000130791	0.000137914	0.000219847	0.000293282	0.000252956	0.000294892	0.000301435	0.00030994	0.00033949	0.000292093	0.000330387	0.000253565	0.000332659	0.000295421	0.000177671	0.000165687	0.000196915	0.000149847	9.99147e-05	8.50075e-05	0.000260891	0.000203027	0.000217461	0.00018094	0.00022226	0.000277433
K01199	glucan endo-1,3-beta-D-glucosidase [EC:3.2.1.39]	3.99587e-06	4.8235e-06	5.93596e-06	3.63069e-06	3.49409e-06	3.51705e-06	5.42674e-06	5.81114e-06	5.21364e-06	1.01743e-05	9.71385e-06	1.00398e-05	1.05986e-05	1.18266e-05	6.48396e-06	5.49637e-06	7.4996e-06	4.50594e-06	2.06268e-07	3.84319e-07	1.38972e-07	7.64647e-07	4.94985e-07	7.6957e-07	8.68853e-08	1.13803e-07	8.67763e-08	5.03836e-07	5.25058e-07	2.71821e-07	2.34633e-06	1.12418e-05	5.4289e-06	8.40401e-06	1.87366e-07	1.49736e-07
K01200	pullulanase [EC:3.2.1.41]	0.000176345	0.00017493	0.000173348	0.000200906	0.000206906	0.000203756	0.000141161	0.000147021	0.000133527	0.000116388	0.000101125	0.000109627	0.000152437	0.0001717	0.000173782	0.000171429	0.000181272	0.00016653	0.000194769	0.000174861	0.000194155	0.000147414	0.000187052	0.00017	9.65941e-05	9.04457e-05	0.00010938	0.000102266	8.37987e-05	6.41402e-05	0.000142238	0.00012579	0.000125851	0.000108422	0.000122921	0.000150627
K01201	glucosylceramidase [EC:3.2.1.45]	1.26504e-05	1.2377e-05	1.3659e-05	9.47156e-06	9.36172e-06	8.82788e-06	2.26762e-06	3.55547e-06	1.39532e-06	5.39015e-07	9.44395e-07	1.60805e-06	2.46553e-06	2.23511e-08	8.46977e-06	9.28136e-06	1.41704e-05	6.96523e-07	2.71836e-06	2.82175e-06	1.87237e-06	3.40594e-06	2.96487e-06	4.01899e-06	8.05723e-07	5.57249e-07	8.43417e-07	2.96151e-07	2.50915e-07	3.06469e-07	6.3684e-07	1.05e-06	1.0012e-06	3.51039e-06	5.05548e-06	6.42518e-06
K01205	alpha-N-acetylglucosaminidase [EC:3.2.1.50]	6.81619e-08	2.62746e-08	2.24379e-08	5.74972e-07	5.46951e-07	5.2313e-07	4.39928e-07	7.37815e-07	3.03999e-07	3.11293e-08	9.71554e-08	1.69212e-07	1.48201e-06	2.08229e-08	1.84886e-06	2.86228e-07	6.25231e-07	5.7128e-07	7.48851e-09	1.34707e-08	5.61925e-09	1.30375e-07	1.30576e-07	1.16548e-07	4.65579e-08	4.43452e-08	7.41213e-08	1.0429e-08	1.06106e-08	1.45442e-08	4.7238e-08	1.37321e-07	6.82385e-08	6.23847e-08	2.48502e-07	2.02961e-07
K01206	alpha-L-fucosidase [EC:3.2.1.51]	4.05004e-06	3.69211e-06	2.83689e-06	2.06216e-05	1.95626e-05	1.75037e-05	1.26803e-05	1.24062e-05	1.14645e-05	6.60735e-06	6.44042e-06	6.44986e-06	2.82245e-05	1.10651e-05	3.38525e-05	1.13533e-05	1.60385e-05	1.11009e-05	1.20791e-06	1.21498e-06	1.81354e-06	7.49284e-06	6.582e-06	6.54266e-06	1.14966e-06	1.91384e-06	2.05399e-06	1.52466e-06	2.198e-06	8.52376e-07	5.6012e-06	4.03782e-06	4.58649e-06	1.86309e-06	5.5346e-06	6.08051e-06
K01207	beta-N-acetylhexosaminidase [EC:3.2.1.52]	0.000224682	0.000217955	0.000226934	0.000171724	0.000174096	0.000176057	0.000193678	0.000192052	0.000195197	0.000143605	0.00013613	0.000138483	0.000168472	0.000142182	0.000197045	0.000181963	0.000189448	0.000159882	0.000211185	0.000213521	0.000212992	0.000175801	0.000176979	0.000181104	0.000228393	0.000228877	0.000222559	0.000183417	0.000182918	0.000183678	0.000188624	0.000164092	0.000180326	0.000179596	0.000221968	0.000212174
K01208	cyclomaltodextrinase [EC:3.2.1.54]	2.21563e-06	2.70054e-06	3.38622e-06	3.09056e-07	2.38204e-07	3.09079e-07	2.94663e-06	3.05816e-06	2.96263e-06	5.79479e-06	5.52845e-06	5.64697e-06	6.02528e-06	6.77318e-06	1.17369e-05	3.02727e-06	5.68555e-06	2.61846e-06	1.00506e-07	2.14428e-07	5.49742e-08	5.59422e-08	1.06454e-08	1.58362e-08	3.25569e-08	4.82041e-08	1.51071e-08	2.8058e-07	2.94115e-07	1.66535e-07	1.31137e-06	6.32053e-06	3.09627e-06	4.78328e-06	0	5.53455e-09
K01209	alpha-N-arabinofuranosidase [EC:3.2.1.55]	1.3377e-05	1.21246e-05	1.41295e-05	1.48167e-05	1.39848e-05	1.35738e-05	1.3797e-05	1.43819e-05	1.2189e-05	1.32293e-06	1.77044e-06	1.64072e-06	2.11822e-05	1.73907e-06	1.95919e-05	8.2282e-06	1.39898e-05	1.22252e-06	3.34686e-06	3.55734e-06	2.77885e-06	4.2867e-06	3.80221e-06	5.15671e-06	1.77805e-06	1.68588e-06	2.73789e-06	3.05565e-07	1.65854e-06	3.0829e-07	1.20559e-06	2.8635e-06	1.94966e-06	4.11463e-06	4.49704e-06	5.85444e-06
K01210	glucan 1,3-beta-glucosidase [EC:3.2.1.58]	0.000133264	0.000132228	0.000123725	0.000124453	0.000131731	0.000134358	0.00010116	0.000103704	9.80729e-05	8.13596e-05	7.69824e-05	7.86827e-05	9.96688e-05	0.000134712	0.000111176	0.000134445	0.00013976	0.000140962	0.000156677	0.000135044	0.000152512	0.000136431	0.000160363	0.000147814	8.54881e-05	8.05565e-05	9.49111e-05	0.000105719	8.55449e-05	7.90758e-05	0.000120041	9.32146e-05	0.000100213	8.35212e-05	0.000103977	0.00012885
K01212	levanase [EC:3.2.1.65]	1.16373e-05	1.13169e-05	1.27702e-05	9.52447e-06	9.2797e-06	8.3798e-06	2.75229e-06	3.49141e-06	1.96161e-06	7.30671e-07	8.39467e-07	1.64502e-06	3.63776e-06	1.49122e-07	1.54402e-05	8.01518e-06	1.35603e-05	7.7906e-07	2.21851e-06	2.26096e-06	1.51316e-06	3.29438e-06	3.03799e-06	3.89368e-06	7.56977e-07	5.41558e-07	8.29547e-07	2.93901e-07	3.42966e-07	2.66124e-07	5.49255e-07	8.03864e-07	8.55284e-07	2.83948e-06	4.21439e-06	5.49547e-06
K01215	glucan 1,6-alpha-glucosidase [EC:3.2.1.70]	0.000163756	0.000161657	0.000153927	0.000154268	0.000162743	0.00016344	0.000115043	0.000117327	0.000109997	8.37727e-05	7.49522e-05	8.04816e-05	0.000114833	0.000153335	0.000134424	0.000162182	0.000168754	0.000160651	0.000182081	0.000158267	0.000177603	0.000139012	0.000178667	0.000160385	9.41953e-05	8.77811e-05	0.000104615	8.81243e-05	6.38895e-05	5.57516e-05	0.000139784	0.00010766	0.000115477	9.78672e-05	0.000121185	0.000150268
K01216	licheninase [EC:3.2.1.73]	4.23172e-09	1.43228e-09	9.0716e-10	6.7363e-08	6.40919e-08	6.15718e-08	4.89262e-08	8.69695e-08	3.44294e-08	3.67487e-09	5.93741e-09	1.84584e-08	9.63241e-08	1.1351e-09	9.34755e-08	3.34119e-08	5.70552e-08	3.10996e-08	8.80026e-10	1.3803e-09	6.63362e-10	1.5391e-08	1.54147e-08	1.37586e-08	5.40518e-09	5.23502e-09	8.75014e-09	1.23116e-09	1.2526e-09	1.34046e-09	5.54418e-09	1.62027e-08	6.90842e-09	7.19618e-09	2.93361e-08	2.28992e-08
K01218	mannan endo-1,4-beta-mannosidase [EC:3.2.1.78]	4.30059e-05	4.12162e-05	4.50834e-05	4.3041e-05	3.92073e-05	4.56118e-05	8.16625e-05	7.23717e-05	7.72892e-05	8.96967e-05	8.66652e-05	9.93882e-05	8.60243e-05	4.78141e-05	4.32034e-05	6.35138e-05	3.9023e-05	9.07222e-05	4.74856e-05	0.000101295	3.84222e-05	7.84837e-05	5.18685e-05	6.94982e-05	0.000113545	0.000109492	0.000118888	0.000181058	0.000228075	0.000254288	9.74481e-05	0.000133721	0.000130476	0.000246822	0.00010451	8.99326e-05
K01219	agarase [EC:3.2.1.81]	8.49879e-07	1.03142e-06	1.20495e-06	9.63164e-08	8.22351e-08	1.13193e-07	1.11402e-06	1.06434e-06	1.01626e-06	2.02552e-06	2.087e-06	2.01625e-06	4.30321e-06	2.40448e-06	2.8138e-06	1.05734e-06	1.39693e-06	1.92028e-06	1.49072e-07	1.67115e-07	1.32172e-07	1.95541e-08	3.72101e-09	5.53541e-09	1.11838e-08	1.68493e-08	5.28056e-09	9.80743e-08	1.02805e-07	5.23818e-08	4.60689e-07	2.2225e-06	1.08278e-06	1.75104e-06	0	4.36852e-08
K01220	6-phospho-beta-galactosidase [EC:3.2.1.85]	3.68751e-07	3.03857e-07	3.86244e-07	2.48163e-06	2.78204e-06	2.16873e-06	7.8882e-07	1.36444e-06	5.40674e-07	1.10971e-06	3.31351e-07	9.19718e-07	4.53079e-07	0	2.52001e-06	8.69499e-07	8.11193e-07	1.66083e-10	7.87782e-08	4.4416e-08	8.64401e-08	6.56711e-07	5.97084e-07	6.12992e-07	1.52555e-07	8.21705e-08	1.37345e-07	1.06282e-07	7.83775e-08	2.29303e-08	1.11118e-07	3.58471e-07	1.83757e-07	1.37249e-07	4.88292e-07	4.69857e-07
K01222	6-phospho-beta-glucosidase [EC:3.2.1.86]	0.000386797	0.000381057	0.000362117	0.000346155	0.000365557	0.000369347	0.000270981	0.000272381	0.000259302	0.000178073	0.000161315	0.000172352	0.000274886	0.000359192	0.00031354	0.000381677	0.00039977	0.000376188	0.000420948	0.000363092	0.000407768	0.000317011	0.000413878	0.000369924	0.000219443	0.000204271	0.000243485	0.000183842	0.000123528	0.000104422	0.000320102	0.000249139	0.000267271	0.000228791	0.000282618	0.000353621
K01223	6-phospho-beta-glucosidase [EC:3.2.1.86]	0.00200083	0.00197339	0.00185487	0.00177511	0.00188741	0.00191726	0.00143185	0.00143222	0.00137884	0.000981079	0.000886675	0.000938871	0.0014528	0.00197228	0.00164969	0.00201334	0.00207284	0.00205978	0.00227701	0.00196102	0.00221159	0.00169483	0.00222563	0.0019762	0.00118915	0.00110784	0.0013171	0.00100215	0.000669002	0.00056839	0.00174508	0.00136567	0.00145809	0.00123176	0.00150176	0.00187759
K01224	arabinogalactan endo-1,4-beta-galactosidase [EC:3.2.1.89]	2.55513e-06	1.73908e-06	2.40285e-06	9.35444e-06	8.75421e-06	8.01672e-06	6.9795e-06	6.96995e-06	6.14498e-06	1.78363e-06	8.6566e-07	1.39494e-06	1.17836e-05	9.10952e-07	9.49443e-06	6.1425e-07	1.2665e-06	1.05567e-06	1.05909e-06	9.97213e-07	1.29482e-06	2.11977e-06	1.94026e-06	2.3187e-06	6.17075e-07	6.80817e-07	1.13796e-06	1.62014e-07	8.43912e-07	3.93208e-08	5.83372e-07	1.8663e-06	1.0615e-06	9.41784e-07	3.81842e-07	5.39089e-07
K01225	cellulose 1,4-beta-cellobiosidase [EC:3.2.1.91]	8.0705e-05	7.77036e-05	8.58976e-05	4.09702e-05	4.08432e-05	3.86604e-05	8.8928e-06	6.51559e-06	6.21074e-06	8.66829e-06	1.09275e-05	1.25351e-05	9.25263e-06	3.21715e-06	7.92722e-06	5.29664e-05	7.39212e-05	8.07581e-06	1.82805e-05	2.27954e-05	1.26004e-05	2.23817e-05	1.81573e-05	2.57687e-05	1.18588e-05	1.01087e-05	1.17461e-05	1.46238e-05	1.77976e-05	1.97422e-05	9.91746e-06	1.36418e-05	1.39898e-05	3.59552e-05	3.1353e-05	4.0361e-05
K01226	trehalose-6-phosphate hydrolase [EC:3.2.1.93]	0.000568507	0.000561193	0.000535133	0.000536385	0.00056435	0.000567959	0.000415014	0.000424235	0.000400469	0.000322997	0.000297051	0.000314143	0.000418205	0.000551977	0.000479723	0.000566089	0.000582147	0.000573007	0.000633862	0.000551552	0.000619788	0.00047844	0.000617787	0.00055336	0.000331716	0.000310086	0.000367147	0.000299868	0.000213892	0.000179203	0.000478671	0.000389284	0.000407366	0.000348422	0.00041995	0.000518806
K01227	mannosyl-glycoprotein endo-beta-N-acetylglucosaminidase [EC:3.2.1.96]	1.46349e-06	1.39183e-06	1.76187e-06	9.99786e-06	1.00135e-05	8.57418e-06	2.74046e-06	4.61261e-06	1.84014e-06	7.90514e-07	6.32229e-08	1.58812e-06	1.53177e-06	0	4.25772e-06	2.4586e-06	2.70677e-06	2.09162e-10	2.77868e-07	1.40422e-07	3.35404e-07	2.30397e-06	2.18191e-06	2.35328e-06	3.81297e-07	2.77801e-07	4.64334e-07	1.47034e-07	1.21886e-07	7.37786e-08	3.34403e-07	9.15341e-07	4.3558e-07	4.24878e-07	1.57085e-06	1.31275e-06
K01230	mannosyl-oligosaccharide alpha-1,2-mannosidase [EC:3.2.1.113]	5.71332e-10	0	1.07502e-09	6.10317e-10	0	0	0	1.51462e-10	1.10052e-09	0	0	0	0	0	1.27249e-07	0	1.94014e-08	1.91462e-10	0	2.339e-10	0	0	0	0	0	0	0	0	0	4.543e-10	0	0	1.30239e-09	2.0324e-10	0	0
K01232	maltose-6'-phosphate glucosidase [EC:3.2.1.122]	0.00103566	0.00102103	0.000953048	0.000932406	0.000991745	0.00101046	0.000762635	0.000765506	0.000734982	0.000514857	0.000465487	0.000492493	0.000770237	0.00104753	0.000866989	0.00105483	0.00107704	0.00109932	0.0012124	0.00104311	0.0011795	0.000899777	0.00118486	0.00104867	0.000635039	0.000592239	0.000704012	0.000535319	0.000357038	0.000303597	0.000931607	0.000722829	0.000775172	0.000646379	0.000795461	0.000991809
K01233	chitosanase [EC:3.2.1.132]	1.36815e-08	4.29723e-09	1.48845e-08	6.97254e-08	6.93941e-08	5.60342e-08	4.96704e-08	7.9708e-08	3.9537e-08	3.32456e-09	1.53171e-08	1.94268e-08	2.28508e-07	3.4056e-09	1.9493e-06	3.92728e-08	1.83425e-07	9.44744e-08	9.83686e-10	5.62032e-09	6.00126e-10	1.39238e-08	1.39453e-08	1.24471e-08	7.07008e-09	4.73599e-09	7.91602e-09	1.1138e-09	1.13319e-09	9.70357e-09	5.01567e-09	1.50463e-08	3.09719e-08	1.03088e-08	2.65396e-08	2.28928e-08
K01234	neopullulanase [EC:3.2.1.135]	0.000356485	0.00035209	0.000339874	0.000307358	0.000323766	0.000324917	0.000226924	0.000226778	0.000217289	0.00016345	0.000149957	0.000159703	0.00022919	0.000308563	0.000253406	0.000340189	0.000363209	0.000318126	0.000359392	0.000311068	0.00034647	0.000281319	0.000356424	0.000323754	0.00018656	0.00017389	0.000205892	0.000175468	0.000129775	0.000119451	0.000277781	0.000219884	0.000231757	0.000205016	0.000247363	0.000309105
K01235	alpha-glucuronidase [EC:3.2.1.139]	1.90084e-05	1.78076e-05	2.02467e-05	1.22695e-05	1.17917e-05	1.13509e-05	9.50313e-06	8.97649e-06	8.22385e-06	1.12938e-06	1.88913e-06	1.46278e-06	1.64201e-05	1.28876e-06	7.18913e-06	1.14376e-05	1.73855e-05	1.65819e-06	3.53791e-06	3.83121e-06	2.38894e-06	4.47375e-06	3.93229e-06	5.61699e-06	1.64121e-06	1.40144e-06	2.21637e-06	3.66073e-07	1.32847e-06	3.28599e-07	1.03133e-06	1.86571e-06	1.57184e-06	4.6026e-06	5.71993e-06	8.12999e-06
K01236	maltooligosyltrehalose trehalohydrolase [EC:3.2.1.141]	7.26444e-05	7.04446e-05	8.14029e-05	4.7691e-05	4.44122e-05	4.58268e-05	0.000153549	0.000139776	0.00015435	9.28328e-05	8.96235e-05	8.23197e-05	0.000128058	4.80524e-05	0.000158387	3.91477e-05	3.64595e-05	3.3308e-05	9.34322e-05	0.000105835	0.000106338	7.37372e-05	4.52383e-05	5.83796e-05	0.000267145	0.000280224	0.000234982	0.000134564	0.000158005	0.000165719	0.000174208	0.000153737	0.000179459	8.84281e-05	0.000170692	0.000115528
K01238	[EC:3.2.1.-]	8.04237e-06	8.78431e-06	9.69025e-06	2.93295e-05	2.80813e-05	2.59834e-05	8.71678e-06	1.3086e-05	8.3937e-06	2.05056e-05	2.24895e-05	2.25284e-05	1.67176e-06	2.27383e-06	1.73802e-05	3.36539e-06	8.73366e-06	1.33689e-06	3.7133e-06	3.21374e-06	3.85632e-06	3.46063e-05	1.78538e-05	2.5018e-05	6.32358e-06	7.10236e-06	7.08051e-06	4.98719e-05	5.48145e-05	5.838e-05	6.75515e-06	6.80944e-06	6.39263e-06	3.25206e-06	6.92414e-06	5.6708e-06
K01239	purine nucleosidase [EC:3.2.2.1]	0.000157618	0.000154956	0.000146981	0.000163847	0.000171276	0.000170411	0.000113806	0.000113472	0.000109023	7.70539e-05	6.89345e-05	7.52796e-05	0.000119846	0.000152954	0.000193927	0.000155776	0.000168597	0.000163359	0.000177862	0.000152586	0.000173355	0.000137701	0.000178712	0.000159925	9.28156e-05	8.65196e-05	0.000102912	7.85513e-05	5.24179e-05	4.45291e-05	0.000136212	0.00010611	0.000113997	9.46682e-05	0.000116728	0.000145859
K01241	AMP nucleosidase [EC:3.2.2.4]	1.1154e-05	1.18612e-05	1.54583e-05	4.32398e-07	4.27041e-07	5.08347e-07	2.639e-06	3.06813e-06	3.05394e-06	2.31555e-05	2.10308e-05	1.86571e-05	1.47507e-05	2.99185e-06	2.53021e-05	3.64727e-06	5.06266e-06	5.96912e-06	1.5862e-05	2.0926e-05	1.94053e-05	2.61284e-07	2.48602e-07	5.17896e-07	1.74766e-06	1.82911e-06	3.05191e-06	2.23033e-05	2.82279e-05	1.88687e-05	2.06015e-06	3.16092e-06	4.7643e-06	2.38872e-06	2.39425e-06	2.12853e-06
K01243	S-adenosylhomocysteine/5'-methylthioadenosine nucleosidase [EC:3.2.2.9]	0.000172299	0.000168643	0.000161106	0.000188775	0.000194194	0.000193157	0.000142794	0.000150741	0.000141083	0.000146801	0.000152853	0.000155087	0.000127082	0.000155803	0.000160239	0.000164626	0.000160435	0.000178998	0.000183117	0.000159348	0.000179791	0.000168301	0.000192189	0.000181035	0.000121721	0.000117201	0.000128597	0.000127259	0.00010421	9.5544e-05	0.000149279	0.000125474	0.00013651	0.000101982	0.00013558	0.000159022
[truncated: 5,572 more rows]
